# Supplementary material for: Investigation of microbial community interactions between Lake Washington methanotrophs using ­­­­­­­genome-scale metabolic modeling
Source: PeerJ. 2020 Jun 30;8:e9464. doi: 10.7717/peerj.9464 (PMC7333651; doi:10.7717/peerj.9464)
Supplement: Data S4 — Biomass contributions of Methylobacter (MB) and Methylomonas (ML) across methane and Oxygen gradient, Maximum and minimum flux ranges of Methylobacter and Methylomonas at different nutrient conditions, and Optcom-predicted flux distribution in Methylobacter and Methylomonas at different nutrient conditions. [file peerj-08-9464-s004.xlsx]

## Sheet: Readme
	Sheet	Description
	CH4_O2_gradient	Biomass contribution of Methylobacter (MB) and Methylomonas (ML) across methane and Oxygen gradient
	FVA MB conditions	Maximum and minimum flux range of Methylobacter at different nutrient conditions
	FVA ML conditions	Maximum and minimum flux range of Methylomonas at different nutrient conditions
	MB flux_conditions	Optcom-predicted flux distribution in Methylobacter at different nutrient conditions
	ML flux_conditions	Optcom-predicted flux distribution in Methylomonas at different nutrient conditions
	Consistency_FVA_FBA	Consistency of FVA predicted flux range shifts and Optcom-predicted single flux values in different conidtions

## Sheet: CH4_O2_gradient
			Methylobacter biomass							Methylomonas biomass
			Methane uptake (mmol/gDCW.hr)							Methane uptake (mmol/gDCW.hr)
			10	20	50	100				10	20	50	100
	Oxygen uptake (mmol/gDCW.hr)	10	0.190736	0.305463	0.305463	0.305463		Oxygen uptake (mmol/gDCW.hr)	10	0	0.003	0.003	0.005
		20	0.190736	0.425246	0.504522	0.504522			20	0.0001	0.005	0.0924608	0.0924608
		50	0.190736	0.425246	0.504522	0.504522			50	0.003	0.005	0.395101	0.631543
		100	0.190736	0.425246	0.504522	0.504522			100	0.003	0.009	0.395101	1.0886

## Sheet: FVA MB  conditions
id	Name	equation	eqn_modelseed	CH4:O2	Rich FVA min	Rich FVA max	O2-limited FVA min	O2-limited FVA max	N2-limited FVA min	N2-limited FVA mAX	CH4-limited FVA min	CH42-limited FVA mAX	natural FVA min MB:ML = 9.3:1.0	natural FVA max MB:ML = 9.3:1.0	synthetic FVA min MB:ML = 0.05:1.0	synthetic FVA max MB:ML = 0.05:1.0
EX_cpd00001_export_MB	H2O export	1.000000 H2O[e0] =>	1.000000 M_cpd00001_e0 =>		19.8429	1021.43	19.8429	1019.84	19.8429	1019.84	19.8429	1050.83	15.3626	1049.21	2.64918	1002.65
EX_cpd00001_uptake_MB	H2O uptake	=> 1.000000 H2O[e0]	=> 1.000000 M_cpd00001_e0		0	1000	0	1000	0	1000	0	1000	0	1000	0	1000
EX_cpd00003_export_MB	NADH export	1.0 NADH[e0] =>	1.0 M_cpd00004_e0 =>		0	0	0	0	0	0	0	0	0	0	0	0
EX_cpd00003_uptake_MB	NADH uptake	=> 1.0 NADH[e0]	=> 1.0 M_cpd00004_e0		0	0	0	0	0	0	0	0	0	0	0	0
EX_cpd00007_export_MB	O2 export	1.000000 O2[e0] =>	1.000000 M_cpd00007_e0 =>		0	-2.27e-08	0	-2.27e-08	0	-2.27e-08	0	15.4949	0	13.2147	0	7.9e-09
EX_cpd00007_uptake_MB	O2 uptake	=> 1.000000 O2[e0]	=> 1.000000 M_cpd00007_e0		21.5138	21.5138	21.5138	21.5138	21.5138	21.5138	37.0088	37.0088	34.7285	34.7285	2.87226	2.87226
EX_cpd00009_export_MB	Phosphate export	1.000000 Phosphate[e0] =>	1.000000 M_cpd00009_e0 =>		0	-6e-10	0	-6e-10	0	-6e-10	0	-6e-10	0	-6e-10	0	0
EX_cpd00009_uptake_MB	Phosphate uptake	=> 1.000000 Phosphate[e0]	=> 1.000000 M_cpd00009_e0		0.20813	0.20813	0.20813	0.20813	0.20813	0.20813	0.20813	0.20813	0.20813	0.20813	0.027787	0.027787
EX_cpd00011_export_MB	CO2 export	1.000000 CO2[e0] =>	1.000000 M_cpd00011_e0 =>		0	4.48027	0	4.48027	0	4.48027	0	4.48027	0	8.96053	0	0.598151
EX_cpd00011_uptake_MB	CO2 uptake	=> 1.000000 CO2[e0]	=> 1.000000 M_cpd00011_e0		0	0	0	0	0	0	0	0	0	0	0	0
EX_cpd00012_export_MB	PPi export	1.000000 PPi[e0] =>	1.000000 M_cpd00012_e0 =>		0	-3e-10	0	-3e-10	0	-3e-10	0	-3e-10	0	-3e-10	0	0
EX_cpd00012_uptake_MB	PPi uptake	=> 1.000000 PPi[e0]	=> 1.000000 M_cpd00012_e0		0	0	0	0	0	0	0	0	0	0	0	0
EX_cpd00013_export_MB	NH3 export	1.000000 NH3[e0] =>	1.000000 M_cpd00013_e0 =>		0	-2.1e-09	0	-2.1e-09	0	-2.1e-09	0	-2.1e-09	0	-2.1e-09	0	0
EX_cpd00013_uptake_MB	NH3 uptake	=> 1.000000 NH3[e0]	=> 1.000000 M_cpd00013_e0		0	0	0	0	0	0	0	0	0	0	0	0
EX_cpd00023_export_MB	L-Glutamate export	1.0 L-Glutamate[e0] =>	1.0 M_cpd00023_e0 =>		0	0	0	0	0	0	0	0	0	0	0	0
EX_cpd00023_uptake_MB	L-Glutamate uptake	=> 1.0 L-Glutamate[e0]	=> 1.0 M_cpd00023_e0		0	0	0	0	0	0	0	0	0	0	0	0
EX_cpd00029_export_MB	Acetate export	1.0 Acetate[e0] =>	1.0 M_cpd00029_e0 =>		0	4.48027	0	-1.76e-08	0	-1.76e-08	0	-1.76e-08	0	4.48027	0	5.9e-09
EX_cpd00029_uptake_MB	Acetate uptake	=> 1.0 Acetate[e0]	=> 1.0 M_cpd00029_e0		0	0	0	0	0	0	0	0	0	0	0	0
EX_cpd00030_export_MB	Mn2+ export	1.000000 Mn2+[e0] =>	1.000000 M_cpd00030_e0 =>		999.999	999.999	999.999	999.999	999.999	999.999	999.999	999.999	999.999	999.999	1000	1000
EX_cpd00030_uptake_MB	Mn2+ uptake	=> 1.000000 Mn2+[e0]	=> 1.000000 M_cpd00030_e0		1000	1000	1000	1000	1000	1000	1000	1000	1000	1000	1000	1000
EX_cpd00034_export_MB	Zn2+ export	1.000000 Zn2+[e0] =>	1.000000 M_cpd00034_e0 =>		0	0	0	0	0	0	0	0	0	0	0	0
EX_cpd00034_uptake_MB	Zn2+ uptake	=> 1.000000 Zn2+[e0]	=> 1.000000 M_cpd00034_e0		0.0009	0.0009	0.0009	0.0009	0.0009	0.0009	0.0009	0.0009	0.0009	0.0009	0.000120157	0.000120157
EX_cpd00035_export_MB	L-Alanine export	1.0 L-Alanine[e0] =>	1.0 M_cpd00035_e0 =>		0	0	0	0	0	0	0	0	0	0	0	0
EX_cpd00035_uptake_MB	L-Alanine uptake	=> 1.0 L-Alanine[e0]	=> 1.0 M_cpd00035_e0		0	0	0	0	0	0	0	0	0	0	0	0
EX_cpd00036_export_MB	Succinate export	1.0 Succinate[e0] =>	1.0 M_cpd00036_e0 =>		0	-1.52e-08	0	-8.8e-09	0	-8.8e-09	0	-8.8e-09	0	2.24013	0	2.9e-09
EX_cpd00036_uptake_MB	Succinate uptake	=> 1.0 Succinate[e0]	=> 1.0 M_cpd00036_e0		0	0	0	0	0	0	0	0	0	0	0	0
EX_cpd00039_export_MB	L-Lysine export	1.000000 L-Lysine[e0] =>	1.000000 M_cpd00039_e0 =>		0	0	0	0	0	0	0	0	0	0	0	0
EX_cpd00039_uptake_MB	L-Lysine uptake	=> 1.000000 L-Lysine[e0]	=> 1.000000 M_cpd00039_e0		0	0	0	0	0	0	0	0	0	0	0	0
EX_cpd00041_export_MB	L-Aspartate export	1.0 L-Aspartate[e0] =>	1.0 M_cpd00041_e0 =>		0	0	0	0	0	0	0	0	0	0	0	0
EX_cpd00041_uptake_MB	L-Aspartate uptake	=> 1.0 L-Aspartate[e0]	=> 1.0 M_cpd00041_e0		0	0	0	0	0	0	0	0	0	0	0	0
EX_cpd00047_export_MB	Formate export	1.0 Formate[e0] =>	1.0 M_cpd00047_e0 =>		0	4.48027	0	4.48027	0	4.48027	0	4.48027	0	8.96053	0	0.598151
EX_cpd00047_export_MB	Formate export	1.0 Formate[e0] =>	1.0 M_cpd00047_e0 =>		0	4.48027	0	4.48027	0	4.48027	0	4.48027	0	8.96053	0	0.598151
EX_cpd00047_uptake_MB	Formate uptake	=> 1.0 Formate[e0]	=> 1.0 M_cpd00047_e0		0	0	0	0	0	0	0	0	0	0	0	0
EX_cpd00047_uptake_MB	Formate uptake	=> 1.0 Formate[e0]	=> 1.0 M_cpd00047_e0		0	0	0	0	0	0	0	0	0	0	0	0
EX_cpd00048_export_MB	Sulfate export	1.000000 Sulfate[e0] =>	1.000000 M_cpd00048_e0 =>		0	2e-10	0	2e-10	0	2e-10	0	2e-10	0	2e-10	0	-2e-10
EX_cpd00048_uptake_MB	Sulfate uptake	=> 1.000000 Sulfate[e0]	=> 1.000000 M_cpd00048_e0		0.051532	0.051532	0.051532	0.051532	0.051532	0.051532	0.051532	0.051532	0.051532	0.051532	0.00687992	0.00687992
EX_cpd00051_export_MB	L-Arginine export	1.000000 L-Arginine[e0] =>	1.000000 M_cpd00051_e0 =>		0	0	0	0	0	0	0	0	0	0	0	0
EX_cpd00051_uptake_MB	L-Arginine uptake	=> 1.000000 L-Arginine[e0]	=> 1.000000 M_cpd00051_e0		0	0	0	0	0	0	0	0	0	0	0	0
EX_cpd00053_export_MB	L-Glutamine export	1.0 L-Glutamine[e0] =>	1.0 M_cpd00053_e0 =>		0	0	0	0	0	0	0	0	0	0	0	0
EX_cpd00053_uptake_MB	L-Glutamine uptake	=> 1.0 L-Glutamine[e0]	=> 1.0 M_cpd00053_e0		0	0	0	0	0	0	0	0	0	0	0	0
EX_cpd00055_export_MB	Formaldehyde export	1.0 Formaldehyde[e0] =>	1.0 M_cpd00055_e0 =>		0	0	0	0	0	0	0	0	0	0	0	0
EX_cpd00055_uptake_MB	Formaldehyde uptake	=> 1.0 Formaldehyde[e0]	=> 1.0 M_cpd00055_e0		0	0	0	0	0	0	0	0	0	0	0	0
EX_cpd00058_export_MB	Cu2+ export	1.000000 Cu2+[e0] =>	1.000000 M_cpd00058_e0 =>		999.997	999.997	999.997	999.997	999.997	999.997	999.997	999.997	999.997	999.997	1000	1000
EX_cpd00058_uptake_MB	Cu2+ uptake	=> 1.000000 Cu2+[e0]	=> 1.000000 M_cpd00058_e0		1000	1000	1000	1000	1000	1000	1000	1000	1000	1000	1000	1000
EX_cpd00060_export_MB	L-Methionine export	1.000000 L-Methionine[e0] =>	1.000000 M_cpd00060_e0 =>		0	0	0	0	0	0	0	0	0	0	0	0
EX_cpd00060_uptake_MB	L-Methionine uptake	=> 1.000000 L-Methionine[e0]	=> 1.000000 M_cpd00060_e0		0	0	0	0	0	0	0	0	0	0	0	0
EX_cpd00063_export_MB	Ca2+ export	1.000000 Ca2+[e0] =>	1.000000 M_cpd00063_e0 =>		999.997	999.997	999.997	999.997	999.997	999.997	999.997	999.997	999.997	999.997	1000	1000
EX_cpd00063_uptake_MB	Ca2+ uptake	=> 1.000000 Ca2+[e0]	=> 1.000000 M_cpd00063_e0		1000	1000	1000	1000	1000	1000	1000	1000	1000	1000	1000	1000
EX_cpd00065_export_MB	L-Tryptophan export	1.000000 L-Tryptophan[e0] =>	1.000000 M_cpd00065_e0 =>		0	0	0	0	0	0	0	0	0	0	0	0
EX_cpd00065_uptake_MB	L-Tryptophan uptake	=> 1.000000 L-Tryptophan[e0]	=> 1.000000 M_cpd00065_e0		0	0	0	0	0	0	0	0	0	0	0	0
EX_cpd00066_export_MB	L-Phenylalanine export	1.000000 L-Phenylalanine[e0] =>	1.000000 M_cpd00066_e0 =>		0	0	0	0	0	0	0	0	0	0	0	0
EX_cpd00066_uptake_MB	L-Phenylalanine uptake	=> 1.000000 L-Phenylalanine[e0]	=> 1.000000 M_cpd00066_e0		0	0	0	0	0	0	0	0	0	0	0	0
EX_cpd00067_export_MB	H+ export	1.000000 H+[e0] =>	1.000000 M_cpd00067_e0 =>		0	111.981	0	66.6035	0	71.0838	0	1022.46	0	961.233	0	83.757
EX_cpd00067_uptake_MB	H+ uptake	=> 1.000000 H+[e0]	=> 1.000000 M_cpd00067_e0		232.845	232.845	198.093	198.093	202.573	202.573	0	1000	38.767	1000	101.312	101.312
EX_cpd00069_export_MB	L-Tyrosine export	1.000000 L-Tyrosine[e0] =>	1.000000 M_cpd00069_e0 =>		0	0	0	0	0	0	0	0	0	0	0	0
EX_cpd00069_uptake_MB	L-Tyrosine uptake	=> 1.000000 L-Tyrosine[e0]	=> 1.000000 M_cpd00069_e0		0	0	0	0	0	0	0	0	0	0	0	0
EX_cpd00075_export_MB	Nitrite export	1.000000 Nitrite[e0] =>	1.000000 M_cpd00075_e0 =>		0	0	0	0	0	0	0	0	0	0	0	0
EX_cpd00075_uptake_MB	Nitrite uptake	=> 1.000000 Nitrite[e0]	=> 1.000000 M_cpd00075_e0		0	0	0	0	0	0	0	0	0	0	0	0
EX_cpd00084_export_MB	L-Cysteine export	1.000000 L-Cysteine[e0] =>	1.000000 M_cpd00084_e0 =>		0	0	0	0	0	0	0	0	0	0	0	0
EX_cpd00084_uptake_MB	L-Cysteine uptake	=> 1.000000 L-Cysteine[e0]	=> 1.000000 M_cpd00084_e0		0	0	0	0	0	0	0	0	0	0	0	0
Ex_cpd00097_export_MB	Pyrroloquinoline-quinone export	1.0 Pyrroloquinoline-quinone[e0] =>	1.0 M_cpd00097_e0 =>		0	0	0	0	0	0	0	0	0	0	0	0
Ex_cpd00097_uptake_MB	Pyrroloquinoline-quinone uptake	=> 1.0 Pyrroloquinoline-quinone[e0]	=> 1.0 M_cpd00097_e0		0	0	0	0	0	0	0	0	0	0	0	0
EX_cpd00099_export_MB	Cl- export	1.000000 Cl-[e0] =>	1.000000 M_cpd00099_e0 =>		999.999	999.999	999.999	999.999	999.999	999.999	999.999	999.999	999.999	999.999	1000	1000
EX_cpd00099_uptake_MB	Cl- uptake	=> 1.000000 Cl-[e0]	=> 1.000000 M_cpd00099_e0		1000	1000	1000	1000	1000	1000	1000	1000	1000	1000	1000	1000
EX_cpd00116_export_MB	Methanol export	1.0 Methanol[e0] =>	1.0 M_cpd00116_e0 =>		0	-2.27e-08	0	-1.76e-08	0	-1.76e-08	0	-1.76e-08	0	4.48027	0	5.9e-09
EX_cpd00116_uptake_MB	Methanol uptake	=> 1.0 Methanol[e0]	=> 1.0 M_cpd00116_e0		0	0	0	0	0	0	0	0	0	0	0	0
EX_cpd00119_export_MB	L-Histidine export	1.000000 L-Histidine[e0] =>	1.000000 M_cpd00119_e0 =>		0	0	0	0	0	0	0	0	0	0	0	0
EX_cpd00119_uptake_MB	L-Histidine uptake	=> 1.000000 L-Histidine[e0]	=> 1.000000 M_cpd00119_e0		0	0	0	0	0	0	0	0	0	0	0	0
EX_cpd00132_export_MB	L-Asparagine export	1.000000 L-Asparagine[e0] =>	1.000000 M_cpd00132_e0 =>		0	0	0	0	0	0	0	0	0	0	0	0
EX_cpd00132_uptake_MB	L-Asparagine uptake	=> 1.000000 L-Asparagine[e0]	=> 1.000000 M_cpd00132_e0		0	0	0	0	0	0	0	0	0	0	0	0
EX_cpd00137_export_MB	Citrate export	1.000000 Citrate[e0] =>	1.000000 M_cpd00137_e0 =>		0	0	0	0	0	0	0	0	0	0	0	0
EX_cpd00137_uptake_MB	Citrate uptake	=> 1.000000 Citrate[e0]	=> 1.000000 M_cpd00137_e0		0	0	0	0	0	0	0	0	0	0	0	0
EX_cpd00149_export_MB	Co2+ export	1.000000 Co2+[e0] =>	1.000000 M_cpd00149_e0 =>		0	-4e-10	0	-4e-10	0	-4e-10	0	-4e-10	0	-4e-10	0	0
EX_cpd00149_uptake_MB	Co2+ uptake	=> 1.000000 Co2+[e0]	=> 1.000000 M_cpd00149_e0		0.00027888	0.00027888	0.00027888	0.00027888	0.00027888	0.00027888	0.00027888	0.00027888	0.00027888	0.00027888	3.72327e-05	3.72327e-05
EX_cpd00156_export_MB	L-Valine export	1.0 L-Valine[e0] =>	1.0 M_cpd00156_e0 =>		0	0	0	0	0	0	0	0	0	0	0	0
EX_cpd00156_uptake_MB	L-Valine uptake	=> 1.0 L-Valine[e0]	=> 1.0 M_cpd00156_e0		0	0	0	0	0	0	0	0	0	0	0	0
EX_cpd00159_export_MB	L-Lactate export	1.0 L-Lactate[e0] =>	1.0 M_cpd00159_e0 =>		0	-1.14e-08	0	-8.8e-09	0	-8.8e-09	0	-8.8e-09	0	2.24013	0	2.9e-09
EX_cpd00159_uptake_MB	L-Lactate uptake	=> 1.0 L-Lactate[e0]	=> 1.0 M_cpd00159_e0		0	0	0	0	0	0	0	0	0	0	0	0
EX_cpd00187_export_MB	Methanamine	1.0 Methanamine =>	1.0 M_cpd00187_c0 =>		0	0	0	0	0	0	0	0	0	0	0	0
EX_cpd00187_uptake_MB	Methanamine	=> 1.0 Methanamine	=> 1.0 M_cpd00187_c0		0	0	0	0	0	0	0	0	0	0	0	0
EX_cpd00205_export_MB	K+ export	1.000000 K+[e0] =>	1.000000 M_cpd00205_e0 =>		0	0	0	0	0	0	0	0	0	0	0	0
EX_cpd00205_uptake_MB	K+ uptake	=> 1.000000 K+[e0]	=> 1.000000 M_cpd00205_e0		0.0009	0.0009	0.0009	0.0009	0.0009	0.0009	0.0009	0.0009	0.0009	0.0009	0.000120157	0.000120157
EX_cpd00209_export_MB	Nitrate export	1.000000 Nitrate[e0] =>	1.000000 M_cpd00209_e0 =>		0	0	0	0	0	0	0	0	0	0	0	0
EX_cpd00209_uptake_MB	Nitrate uptake	=> 1.000000 Nitrate[e0]	=> 1.000000 M_cpd00209_e0		0	0	0	0	0	0	0	0	0	0	0	0
EX_cpd00215_export_MB	Pyridoxal export	1.000000 Pyridoxal[e0] =>	1.000000 M_cpd00215_e0 =>		0	0	0	0	0	0	0	0	0	0	0	0
EX_cpd00215_uptake_MB	Pyridoxal uptake	=> 1.000000 Pyridoxal[e0]	=> 1.000000 M_cpd00215_e0		0	0	0	0	0	0	0	0	0	0	0	0
EX_cpd00218_export_MB	Niacin export	1.0 Niacin[e0] =>	1.0 M_cpd00218_e0 =>		0	0	0	0	0	0	0	0	0	0	0	0
EX_cpd00218_uptake_MB	Niacin uptake	=> 1.0 Niacin[e0]	=> 1.0 M_cpd00218_e0		0	0	0	0	0	0	0	0	0	0	0	0
EX_cpd00220_export_MB	Riboflavin export	1.000000 Riboflavin[e0] =>	1.000000 M_cpd00220_e0 =>		0	0	0	0	0	0	0	0	0	0	0	0
EX_cpd00220_uptake_MB	Riboflavin uptake	=> 1.000000 Riboflavin[e0]	=> 1.000000 M_cpd00220_e0		0	0	0	0	0	0	0	0	0	0	0	0
Ex_cpd00239_export_MB	H2S export	1.0 H2S[e0] =>	1.0 M_cpd00239_e0 =>		0	0	0	0	0	0	0	0	0	0	0	0
Ex_cpd00239_uptake_MB	H2S uptake	=> 1.0 H2S[e0]	=> 1.0 M_cpd00239_e0		0	0	0	0	0	0	0	0	0	0	0	0
EX_cpd00254_export_MB	Mg export	1.000000 Mg[e0] =>	1.000000 M_cpd00254_e0 =>		0	-2e-10	0	-2e-10	0	-2e-10	0	-2e-10	0	-2e-10	0	-3e-10
EX_cpd00254_uptake_MB	Mg uptake	=> 1.000000 Mg[e0]	=> 1.000000 M_cpd00254_e0		0.0195216	0.0195216	0.0195216	0.0195216	0.0195216	0.0195216	0.0195216	0.0195216	0.0195216	0.0195216	0.00260629	0.00260629
EX_cpd00268_export_MB	H2S2O3 export	1.000000 H2S2O3[e0] =>	1.000000 M_cpd00268_e0 =>		0	0	0	0	0	0	0	0	0	0	0	0
EX_cpd00268_uptake_MB	H2S2O3 uptake	=> 1.000000 H2S2O3[e0]	=> 1.000000 M_cpd00268_e0		0	0	0	0	0	0	0	0	0	0	0	0
EX_cpd00305_export_MB	Thiamin export	1.000000 Thiamin[e0] =>	1.000000 M_cpd00305_e0 =>		0	0	0	0	0	0	0	0	0	0	0	0
EX_cpd00305_uptake_MB	Thiamin uptake	=> 1.000000 Thiamin[e0]	=> 1.000000 M_cpd00305_e0		0.0009	0.0009	0.0009	0.0009	0.0009	0.0009	0.0009	0.0009	0.0009	0.0009	0.000120157	0.000120157
EX_cpd00322_export_MB	L-Isoleucine export	1.000000 L-Isoleucine[e0] =>	1.000000 M_cpd00322_e0 =>		0	0	0	0	0	0	0	0	0	0	0	0
EX_cpd00322_uptake_MB	L-Isoleucine uptake	=> 1.000000 L-Isoleucine[e0]	=> 1.000000 M_cpd00322_e0		0	0	0	0	0	0	0	0	0	0	0	0
Ex_cpd00393_export_MB	Folate export	1.000000 Folate[e0] =>	1.000000 M_cpd00393_e0 =>		0	0	0	0	0	0	0	0	0	0	0	0
Ex_cpd00393_uptake_MB	Folate uptake	=> 1.000000 Folate[e0]	=> 1.000000 M_cpd00393_e0		0	0	0	0	0	0	0	0	0	0	0	0
EX_cpd00528_export_MB	N2 export	1.0 N2[e0] =>	1.0 M_cpd00528_e0 =>		0	-1.1e-09	0	-1.1e-09	0	-1.1e-09	0	-1.1e-09	0	-1.1e-09	0	0
EX_cpd00528_uptake_MB	N2 uptake	=> 1.0 N2[e0]	=> 1.0 M_cpd00528_e0		1.04499	1.04499	1.04499	1.04499	1.04499	1.04499	1.04499	1.04499	1.04499	1.04499	0.139515	0.139515
EX_cpd00531_export_MB	Hg2+ export	1.000000 Hg2+[e0] =>	1.000000 M_cpd00531_e0 =>		0	0	0	0	0	0	0	0	0	0	0	0
EX_cpd00531_uptake_MB	Hg2+ uptake	=> 1.000000 Hg2+[e0]	=> 1.000000 M_cpd00531_e0		0	0	0	0	0	0	0	0	0	0	0	0
EX_cpd00635_export_MB	Cbl export	1.000000 Cbl[e0] =>	1.000000 M_cpd00635_e0 =>		0	0	0	0	0	0	0	0	0	0	0	0
EX_cpd00635_uptake_MB	Cbl uptake	=> 1.000000 Cbl[e0]	=> 1.000000 M_cpd00635_e0		0	0	0	0	0	0	0	0	0	0	0	0
EX_cpd00643_export_MB	Methanofuran export	1.0 Methanofuran[e0] =>	1.0 M_cpd00643_e0 =>		0	0	0	0	0	0	0	0	0	0	0	0
EX_cpd00643_uptake_MB	Methanofuran uptake	=> 1.0 Methanofuran[e0]	=> 1.0 M_cpd00643_e0		0	0	0	0	0	0	0	0	0	0	0	0
Ex_cpd00895_export_MB	H4MPT export	1.0 H4MPT[e0] =>	1.0 M_cpd00895_e0 =>		0	0	0	0	0	0	0	0	0	0	0	0
Ex_cpd00895_uptake_MB	H4MPT uptake	=> 1.0 H4MPT[e0]	=> 1.0 M_cpd00895_e0		0	0	0	0	0	0	0	0	0	0	0	0
EX_cpd00971_export_MB	Na+ export	1.000000 Na+[e0] =>	1.000000 M_cpd00971_e0 =>		0	1000	0	1000	0	1000	0	1000	0	1000	0	1000
EX_cpd00971_uptake_MB	Na+ uptake	=> 1.000000 Na+[e0]	=> 1.000000 M_cpd00971_e0		0	1000	0	1000	0	1000	0	1000	0	1000	0	1000
EX_cpd00986_export_MB	PQQH2 export	1.0 PQQH2[e0] =>	1.0 M_cpd00986_e0 =>		0	0	0	0	0	0	0	0	0	0	0	0
EX_cpd00986_uptake_MB	PQQH2 uptake	=> 1.0 PQQH2[e0]	=> 1.0 M_cpd00986_e0		0	0	0	0	0	0	0	0	0	0	0	0
EX_cpd01012_export_MB	Cd2+ export	1.000000 Cd2+[e0] =>	1.000000 M_cpd01012_e0 =>		0	1000	0	1000	0	1000	0	1000	0	1000	0	1000
EX_cpd01012_uptake_MB	Cd2+ uptake	=> 1.000000 Cd2+[e0]	=> 1.000000 M_cpd01012_e0		0	1000	0	1000	0	1000	0	1000	0	1000	0	1000
EX_cpd01017_export_MB	Cys-Gly export	1.000000 Cys-Gly[e0] =>	1.000000 M_cpd01017_e0 =>		0	0	0	0	0	0	0	0	0	0	0	0
EX_cpd01017_uptake_MB	Cys-Gly uptake	=> 1.000000 Cys-Gly[e0]	=> 1.000000 M_cpd01017_e0		0	0	0	0	0	0	0	0	0	0	0	0
EX_cpd01024_export_MB	Methane export	1.000000 Methane[e0] =>	1.000000 M_cpd01024_e0 =>		0	4.48027	0	-1.76e-08	0	-1.76e-08	0	-1.76e-08	0	4.48027	0	5.9e-09
EX_cpd01024_uptake_MB	Methane uptake	=> 1.000000 Methane[e0]	=> 1.000000 M_cpd01024_e0		19.3742	19.3742	14.894	14.894	14.894	14.894	14.894	14.894	19.3742	19.3742	1.98846	1.98846
EX_cpd01048_export_MB	Arsenate export	1.000000 Arsenate[e0] =>	1.000000 M_cpd01048_e0 =>		0	0	0	0	0	0	0	0	0	0	0	0
EX_cpd01048_uptake_MB	Arsenate uptake	=> 1.000000 Arsenate[e0]	=> 1.000000 M_cpd01048_e0		0	0	0	0	0	0	0	0	0	0	0	0
EX_cpd04097_export_MB	Pb export	1.000000 Pb[e0] =>	1.000000 M_cpd04097_e0 =>		0	0	0	0	0	0	0	0	0	0	0	0
EX_cpd04097_uptake_MB	Pb uptake	=> 1.000000 Pb[e0]	=> 1.000000 M_cpd04097_e0		0	0	0	0	0	0	0	0	0	0	0	0
EX_cpd04098_export_MB	Arsenite export	1.000000 Arsenite[e0] =>	1.000000 M_cpd04098_e0 =>		0	0	0	0	0	0	0	0	0	0	0	0
EX_cpd04098_uptake_MB	Arsenite uptake	=> 1.000000 Arsenite[e0]	=> 1.000000 M_cpd04098_e0		0	0	0	0	0	0	0	0	0	0	0	0
EX_cpd10515_export_MB	Fe+2 export	1.000000 Fe+2[e0] =>	1.000000 M_cpd10515_e0 =>		0	1000	0	1000	0	1000	0	1000	0	1000	0	1000
EX_cpd10515_uptake_MB	Fe+2 uptake	=> 1.000000 Fe+2[e0]	=> 1.000000 M_cpd10515_e0		1e-10	1000	1e-10	1000	1e-10	1000	1e-10	1000	1e-10	1000	2e-10	1000
EX_cpd10516_export_MB	Fe+3 export	1.000000 Fe+3[e0] =>	1.000000 M_cpd10516_e0 =>		0	-9.09e-08	0	-9.09e-08	0	-9.09e-08	0	0.00344539	0	0.00344539	0	3.17e-08
EX_cpd10516_uptake_MB	Fe+3 uptake	=> 1.000000 Fe+3[e0]	=> 1.000000 M_cpd10516_e0		0.00434539	0.00434539	0.00434539	0.00434539	0.00434539	0.00434539	0.00434539	0.00434539	0.00434539	0.00434539	0.000580144	0.000580144
EX_cpd11416_export_MB	Biomass[c0]	1.000000 Biomass[c0] =>	1.000000 M_cpd11416_c0 =>		0.504522	0.504522	0.504522	0.504522	0.504522	0.504522	0.504522	0.504522	0.504522	0.504522	0.0673577	0.0673576
EX_cpd11416_uptake_MB	Biomass[c0]	=> 1.000000 Biomass[c0]	=> 1.000000 M_cpd11416_c0		0	0	0	0	0	0	0	0	0	0	0	0
EX_cpd11493_export_MB	ACP export	1.0 ACP[e0] =>	1.0 M_cpd11493_e0 =>		0	0	0	0	0	0	0	0	0	0	0	0
EX_cpd11493_uptake_MB	ACP uptake	=> 1.0 ACP[e0]	=> 1.0 M_cpd11493_e0		0	0	0	0	0	0	0	0	0	0	0	0
EX_cpd11580_export_MB	Gly-Gln export	1.000000 Gly-Gln[e0] =>	1.000000 M_cpd11580_e0 =>		0	0	0	0	0	0	0	0	0	0	0	0
EX_cpd11580_uptake_MB	Gly-Gln uptake	=> 1.000000 Gly-Gln[e0]	=> 1.000000 M_cpd11580_e0		0	0	0	0	0	0	0	0	0	0	0	0
EX_cpd11581_export_MB	gly-asn-L export	1.000000 gly-asn-L[e0] =>	1.000000 M_cpd11581_e0 =>		0	0	0	0	0	0	0	0	0	0	0	0
EX_cpd11581_uptake_MB	gly-asn-L uptake	=> 1.000000 gly-asn-L[e0]	=> 1.000000 M_cpd11581_e0		0	0	0	0	0	0	0	0	0	0	0	0
EX_cpd11582_export_MB	ala-L-Thr-L export	1.000000 ala-L-Thr-L[e0] =>	1.000000 M_cpd11582_e0 =>		0	0	0	0	0	0	0	0	0	0	0	0
EX_cpd11582_uptake_MB	ala-L-Thr-L uptake	=> 1.000000 ala-L-Thr-L[e0]	=> 1.000000 M_cpd11582_e0		0	0	0	0	0	0	0	0	0	0	0	0
EX_cpd11583_export_MB	Ala-Leu export	1.000000 Ala-Leu[e0] =>	1.000000 M_cpd11583_e0 =>		0	0	0	0	0	0	0	0	0	0	0	0
EX_cpd11583_uptake_MB	Ala-Leu uptake	=> 1.000000 Ala-Leu[e0]	=> 1.000000 M_cpd11583_e0		0	0	0	0	0	0	0	0	0	0	0	0
EX_cpd11584_export_MB	Ala-His export	1.000000 Ala-His[e0] =>	1.000000 M_cpd11584_e0 =>		0	0	0	0	0	0	0	0	0	0	0	0
EX_cpd11584_uptake_MB	Ala-His uptake	=> 1.000000 Ala-His[e0]	=> 1.000000 M_cpd11584_e0		0	0	0	0	0	0	0	0	0	0	0	0
EX_cpd11585_export_MB	L-alanylglycine export	1.000000 L-alanylglycine[e0] =>	1.000000 M_cpd11585_e0 =>		0	0	0	0	0	0	0	0	0	0	0	0
EX_cpd11585_uptake_MB	L-alanylglycine uptake	=> 1.000000 L-alanylglycine[e0]	=> 1.000000 M_cpd11585_e0		0	0	0	0	0	0	0	0	0	0	0	0
EX_cpd11586_export_MB	ala-L-glu-L export	1.000000 ala-L-glu-L[e0] =>	1.000000 M_cpd11586_e0 =>		0	0	0	0	0	0	0	0	0	0	0	0
EX_cpd11586_uptake_MB	ala-L-glu-L uptake	=> 1.000000 ala-L-glu-L[e0]	=> 1.000000 M_cpd11586_e0		0	0	0	0	0	0	0	0	0	0	0	0
EX_cpd11587_export_MB	Ala-Gln export	1.000000 Ala-Gln[e0] =>	1.000000 M_cpd11587_e0 =>		0	0	0	0	0	0	0	0	0	0	0	0
EX_cpd11587_uptake_MB	Ala-Gln uptake	=> 1.000000 Ala-Gln[e0]	=> 1.000000 M_cpd11587_e0		0	0	0	0	0	0	0	0	0	0	0	0
EX_cpd11588_export_MB	gly-pro-L export	1.000000 gly-pro-L[e0] =>	1.000000 M_cpd11588_e0 =>		0	0	0	0	0	0	0	0	0	0	0	0
EX_cpd11588_uptake_MB	gly-pro-L uptake	=> 1.000000 gly-pro-L[e0]	=> 1.000000 M_cpd11588_e0		0	0	0	0	0	0	0	0	0	0	0	0
EX_cpd11589_export_MB	gly-asp-L export	1.000000 gly-asp-L[e0] =>	1.000000 M_cpd11589_e0 =>		0	0	0	0	0	0	0	0	0	0	0	0
EX_cpd11589_uptake_MB	gly-asp-L uptake	=> 1.000000 gly-asp-L[e0]	=> 1.000000 M_cpd11589_e0		0	0	0	0	0	0	0	0	0	0	0	0
EX_cpd11590_export_MB	met-L-ala-L export	1.000000 met-L-ala-L[e0] =>	1.000000 M_cpd11590_e0 =>		0	0	0	0	0	0	0	0	0	0	0	0
EX_cpd11590_uptake_MB	met-L-ala-L uptake	=> 1.000000 met-L-ala-L[e0]	=> 1.000000 M_cpd11590_e0		0	0	0	0	0	0	0	0	0	0	0	0
EX_cpd11591_export_MB	Gly-Met export	1.000000 Gly-Met[e0] =>	1.000000 M_cpd11591_e0 =>		0	0	0	0	0	0	0	0	0	0	0	0
EX_cpd11591_uptake_MB	Gly-Met uptake	=> 1.000000 Gly-Met[e0]	=> 1.000000 M_cpd11591_e0		0	0	0	0	0	0	0	0	0	0	0	0
EX_cpd11592_export_MB	gly-glu-L export	1.000000 gly-glu-L[e0] =>	1.000000 M_cpd11592_e0 =>		0	0	0	0	0	0	0	0	0	0	0	0
EX_cpd11592_uptake_MB	gly-glu-L uptake	=> 1.000000 gly-glu-L[e0]	=> 1.000000 M_cpd11592_e0		0	0	0	0	0	0	0	0	0	0	0	0
EX_cpd11593_export_MB	ala-L-asp-L export	1.000000 ala-L-asp-L[e0] =>	1.000000 M_cpd11593_e0 =>		0	0	0	0	0	0	0	0	0	0	0	0
EX_cpd11593_uptake_MB	ala-L-asp-L uptake	=> 1.000000 ala-L-asp-L[e0]	=> 1.000000 M_cpd11593_e0		0	0	0	0	0	0	0	0	0	0	0	0
EX_cpd11912_export_MB	tRNA-Glu export	1.0 tRNA-Glu[e0] =>	1.0 M_cpd11912_e0 =>		0	0	0	0	0	0	0	0	0	0	0	0
EX_cpd11912_uptake_MB	tRNA-Glu uptake	=> 1.0 tRNA-Glu[e0]	=> 1.0 M_cpd11912_e0		0	0	0	0	0	0	0	0	0	0	0	0
EX_cpd15302_export_MB	glycogen(n-1)[c0]	1.000000 glycogen(n-1)[c0] =>	1.000000 M_cpd15302_c0 =>		0	0	0	0	0	0	0	0	0	0	0	0
EX_cpd15302_uptake_MB	glycogen(n-1)[c0]	=> 1.000000 glycogen(n-1)[c0]	=> 1.000000 M_cpd15302_c0		0	0	0	0	0	0	0	0	0	0	0	0
Ex_cpd15560_export_MB	Ubiquinol-8 export	1.0 Ubiquinol-8[e0] =>	1.0 M_cpd15561_e0 =>		0	0	0	0	0	0	0	0	0	0	0	0
Ex_cpd15560_uptake_MB	Ubiquinol-8 uptake	=> 1.0 Ubiquinol-8[e0]	=> 1.0 M_cpd15561_e0		0	0	0	0	0	0	0	0	0	0	0	0
EX_cpd15603_export_MB	Gly-Cys export	1.000000 Gly-Cys[e0] =>	1.000000 M_cpd15603_e0 =>		0	0	0	0	0	0	0	0	0	0	0	0
EX_cpd15603_uptake_MB	Gly-Cys uptake	=> 1.000000 Gly-Cys[e0]	=> 1.000000 M_cpd15603_e0		0	0	0	0	0	0	0	0	0	0	0	0
EX_cpd15604_export_MB	Gly-Leu export	1.000000 Gly-Leu[e0] =>	1.000000 M_cpd15604_e0 =>		0	0	0	0	0	0	0	0	0	0	0	0
EX_cpd15604_uptake_MB	Gly-Leu uptake	=> 1.000000 Gly-Leu[e0]	=> 1.000000 M_cpd15604_e0		0	0	0	0	0	0	0	0	0	0	0	0
EX_cpd15605_export_MB	Gly-Phe export	1.000000 Gly-Phe[e0] =>	1.000000 M_cpd15605_e0 =>		0	0	0	0	0	0	0	0	0	0	0	0
EX_cpd15605_uptake_MB	Gly-Phe uptake	=> 1.000000 Gly-Phe[e0]	=> 1.000000 M_cpd15605_e0		0	0	0	0	0	0	0	0	0	0	0	0
EX_cpd15606_export_MB	Gly-Tyr export	1.000000 Gly-Tyr[e0] =>	1.000000 M_cpd15606_e0 =>		0	0	0	0	0	0	0	0	0	0	0	0
EX_cpd15606_uptake_MB	Gly-Tyr uptake	=> 1.000000 Gly-Tyr[e0]	=> 1.000000 M_cpd15606_e0		0	0	0	0	0	0	0	0	0	0	0	0
EX_cpd23263_export_MB	2-amino-4-[5-(2-amino-2-carboxylatoethyl)-2-hydroxyphenyl]pentanedioate export	1.0 2-amino-4-[5-(2-amino-2-carboxylatoethyl)-2-hydroxyphenyl]pentanedioate[e0] =>	1.0 M_cpd23263_e0 =>		0	1000	0	1000	0	1000	0	1000	0	1000	0	1000
EX_cpd23263_uptake_MB	2-amino-4-[5-(2-amino-2-carboxylatoethyl)-2-hydroxyphenyl]pentanedioate uptake	=> 1.0 2-amino-4-[5-(2-amino-2-carboxylatoethyl)-2-hydroxyphenyl]pentanedioate[e0]	=> 1.0 M_cpd23263_e0		0	1000	0	1000	0	1000	0	1000	0	1000	0	1000
Formaldehyde_Symport	0	1.0 Formaldehyde[e0] + 1.0 H+[e0] => 1.0 Formaldehyde[c0] + 1.0 H+[c0]	1.0 M_cpd00055_e0 + 1.0 M_cpd00067_e0 => 1.0 M_cpd00055_c0 + 1.0 M_cpd00067_c0		0	0	0	0	0	0	0	0	0	0	0	0
R_rxn00006_c0	hydrogen-peroxide:hydrogen-peroxide oxidoreductase	2.0 H2O2[c0] => 1.0 O2[c0] + 2.0 H2O[c0]	2.0 M_cpd00025_c0 => 1.0 M_cpd00007_c0 + 2.0 M_cpd00001_c0		0	-2.27e-08	0	-2.27e-08	0	-2.27e-08	0	15.4949	0	13.2147	0	7.9e-09
R_rxn00011_c0	pyruvate:thiamin diphosphate acetaldehydetransferase (decarboxylating)	1.000000 H+[c0] + 1.000000 Pyruvate[c0] + 1.000000 TPP[c0] => 1.000000 2-Hydroxyethyl-ThPP[c0] + 1.000000 CO2[c0]	1.000000 M_cpd00067_c0 + 1.000000 M_cpd00020_c0 + 1.000000 M_cpd00056_c0 => 1.000000 M_cpd03049_c0 + 1.000000 M_cpd00011_c0		0	-1.14e-08	0	-1.14e-08	0	-1.14e-08	0	-1.76e-08	0	4.48027	0	4e-09
R_rxn00012_c0	sucrose:sucrose 1'-beta-D-fructosyltransferase	2.000000 Sucrose[c0] <=> 1.000000 D-Glucose[c0] + 1.000000 1F-beta-D-Fructosylsucrose[c0]	2.000000 M_cpd00076_c0 <=> 1.000000 M_cpd00027_c0 + 1.000000 M_cpd02298_c0		0	0	0	0	0	0	0	0	0	0	0	0
R_rxn00020_c0	cellobiose glucohydrolase	1.000000 H2O[c0] + 1.000000 CELB[c0] => 2.000000 beta-D-Glucose[c0]	1.000000 M_cpd00001_c0 + 1.000000 M_cpd00158_c0 => 2.000000 M_cpd00190_c0		0	0	0	0	0	0	0	0	0	0	0	0
R_rxn00029_c0	5-aminolevulinate hydro-lyase (adding 5-aminolevulinate and cyclizing; porphobilinogen-forming)	2.000000 5-Aminolevulinate[c0] => 1.000000 H+[c0] + 2.000000 H2O[c0] + 1.000000 Porphobilinogen[c0]	2.000000 M_cpd00338_c0 => 1.000000 M_cpd00067_c0 + 2.000000 M_cpd00001_c0 + 1.000000 M_cpd00689_c0		0.0072	0.0072	0.0072	0.0072	0.0072	0.0072	0.0072	0.0072	0.0072	0.0072	0.000961257	0.000961254
R_rxn00048_c0	6,7-Dimethyl-8-(1-D-ribityl)lumazine:6,7-dimethyl-8-(1-D-ribityl)lumazine 2,3-butanediyltransferase	1.000000 H+[c0] + 2.000000 6-7-Dimethyl-8--1-D-ribityllumazine[c0] => 1.000000 Riboflavin[c0] + 1.000000 4--1-D-Ribitylamino-5-aminouracil[c0]	1.000000 M_cpd00067_c0 + 2.000000 M_cpd02656_c0 => 1.000000 M_cpd00220_c0 + 1.000000 M_cpd02882_c0		6.13702e-05	6.13698e-05	6.13702e-05	6.13698e-05	6.13702e-05	6.13698e-05	6.13702e-05	6.13698e-05	6.13702e-05	6.13698e-05	8.1934e-06	8.1928e-06
R_rxn00055_c0	S-adenosyl-L-methionine:S-adenosyl-L-methionine 3-amino-3-carboxypropyltransferase	3.000000 S-Adenosyl-L-methionine[c0] <=> 4.000000 H+[c0] + 3.000000 5-Methylthioadenosine[c0] + 1.000000 Nicotianamine[c0]	3.000000 M_cpd00017_c0 <=> 4.000000 M_cpd00067_c0 + 3.000000 M_cpd00147_c0 + 1.000000 M_cpd03158_c0		0	0	0	0	0	0	0	0	0	0	0	0
R_rxn00056_c0	Fe(II):oxygen oxidoreductase	2.000000 H2O[c0] + 4.000000 Fe+3[c0] => 4.000000 H+[c0] + 1.000000 O2[c0] + 4.000000 Fe+2[c0]	2.000000 M_cpd00001_c0 + 4.000000 M_cpd10516_c0 => 4.000000 M_cpd00067_c0 + 1.000000 M_cpd00007_c0 + 4.000000 M_cpd10515_c0		0.000861371	0.000861349	0.000861371	0.000861349	0.000861371	0.000861349	0	0.000861349	0	0.000861349	0.000114989	0.000114997
R_rxn00058_c0	Ferrocytochrome-c:oxygen oxidoreductase	4.000000 H+[c0] + 1.000000 O2[c0] + 4.000000 Cytochrome c2+[c0] => 2.000000 H2O[c0] + 4.000000 Cytochrome c3+[c0]	4.000000 M_cpd00067_c0 + 1.000000 M_cpd00007_c0 + 4.000000 M_cpd00110_c0 => 2.000000 M_cpd00001_c0 + 4.000000 M_cpd00109_c0		0	13.9976	0	8.32544	0	8.88547	0	131.806	0	120.154	0	10.4696
R_rxn00060_c0	porphobilinogen:(4-[2-carboxyethyl]-3-[carboxymethyl]pyrrol-2-yl)methyltransferase (hydrolysing)	1.000000 H2O[c0] + 4.000000 Porphobilinogen[c0] => 4.000000 NH3[c0] + 1.000000 Hydroxymethylbilane[c0]	1.000000 M_cpd00001_c0 + 4.000000 M_cpd00689_c0 => 4.000000 M_cpd00013_c0 + 1.000000 M_cpd00755_c0		0.0018	0.0018	0.0018	0.0018	0.0018	0.0018	0.0018	0.0018	0.0018	0.0018	0.000240314	0.000240314
R_rxn00062_c0	ATP phosphohydrolase	1.000000 ATP[c0] + 1.000000 H2O[c0] => 1.000000 H+[c0] + 1.000000 ADP[c0] + 1.000000 Phosphate[c0]	1.000000 M_cpd00002_c0 + 1.000000 M_cpd00001_c0 => 1.000000 M_cpd00067_c0 + 1.000000 M_cpd00008_c0 + 1.000000 M_cpd00009_c0		0	21.6	0	16.6509	0	17.7709	0	21.6	21.6	21.6	0	20.9393
R_rxn00065_c0	ATP diphosphate-lyase (cyclizing; 3',5'-cyclic-AMP-forming)	1.000000 ATP[c0] => 1.000000 PPi[c0] + 1.000000 H+[c0] + 1.000000 cAMP[c0]	1.000000 M_cpd00002_c0 => 1.000000 M_cpd00012_c0 + 1.000000 M_cpd00067_c0 + 1.000000 M_cpd00446_c0		0	13.9976	0	8.32544	0	8.88547	0	131.806	0	124.27	0	10.4696
R_rxn00077_c0	ATP:NAD+ 2'-phosphotransferase	1.000000 ATP[c0] + 1.000000 NAD[c0] <=> 1.000000 H+[c0] + 1.000000 ADP[c0] + 1.000000 NADP[c0]	1.000000 M_cpd00002_c0 + 1.000000 M_cpd00003_c0 <=> 1.000000 M_cpd00067_c0 + 1.000000 M_cpd00008_c0 + 1.000000 M_cpd00006_c0		0	-2e-10	0	-2e-10	0	-2e-10	0	-2e-10	0	-2e-10	0	-3e-10
R_rxn00083_c0	NADPH:NAD+ oxidoreductase	1.000000 NAD[c0] + 1.000000 NADPH[c0] <=> 1.000000 NADH[c0] + 1.000000 NADP[c0]	1.000000 M_cpd00003_c0 + 1.000000 M_cpd00005_c0 <=> 1.000000 M_cpd00004_c0 + 1.000000 M_cpd00006_c0		182.852	324.694	198.79	285.599	198.79	290.639	96.5164	1272.97	133.592	1249.62	26.5401	122.353
R_rxn00086_c0	glutathione:NADP+ oxidoreductase	2.000000 GSH[c0] + 1.000000 NADP[c0] <=> 1.000000 H+[c0] + 1.000000 NADPH[c0] + 1.000000 Oxidized glutathione[c0]	2.000000 M_cpd00042_c0 + 1.000000 M_cpd00006_c0 <=> 1.000000 M_cpd00067_c0 + 1.000000 M_cpd00005_c0 + 1.000000 M_cpd00111_c0		-21.4309	0.0144257	-14.8468	0.0144257	-15.4068	0.0144257	-138.328	0.0144257	-126.763	0.0144257	-11.3403	0.00192594
R_rxn00095_c0	P1,P4-bis(5'-adenosyl)-tetraphosphate nucleotidebisphosphohydrolase	1.000000 H2O[c0] + 1.000000 AppppA[c0] => 2.000000 ADP[c0]	1.000000 M_cpd00001_c0 + 1.000000 M_cpd00924_c0 => 2.000000 M_cpd00008_c0		0	0	0	0	0	0	0	0	0	0	0	0
R_rxn00097_c0	ATP:AMP phosphotransferase	1.000000 H+[c0] + 1.000000 ATP[c0] + 1.000000 AMP[c0] <=> 2.000000 ADP[c0]	1.000000 M_cpd00067_c0 + 1.000000 M_cpd00002_c0 + 1.000000 M_cpd00018_c0 <=> 2.000000 M_cpd00008_c0		0.30066	14.2983	0.30066	8.6261	0.30066	9.18613	0.28626	132.107	0.28626	124.571	0.0401404	10.5098
R_rxn00100_c0	ATP:dephospho-CoA 3'-phosphotransferase	1.000000 ATP[c0] + 1.000000 Dephospho-CoA[c0] => 1.000000 H+[c0] + 1.000000 ADP[c0] + 1.000000 CoA[c0]	1.000000 M_cpd00002_c0 + 1.000000 M_cpd00655_c0 => 1.000000 M_cpd00067_c0 + 1.000000 M_cpd00008_c0 + 1.000000 M_cpd00010_c0		0	2e-10	0	2e-10	0	2e-10	0	2e-10	0	2e-10	0	-2e-10
R_rxn00101_c0	Urea amidohydrolase	2.000000 H+[c0] + 1.000000 H2O[c0] + 1.000000 Urea[c0] => 1.000000 CO2[c0] + 2.000000 NH3[c0]	2.000000 M_cpd00067_c0 + 1.000000 M_cpd00001_c0 + 1.000000 M_cpd00073_c0 => 1.000000 M_cpd00011_c0 + 2.000000 M_cpd00013_c0		0	7.17463	0	2.69436	0	2.69436	0	2.69436	0	7.17463	0	0.359719
R_rxn00102_c0	0	1.0 H2CO3[c0] <=> 1.0 H2O[c0] + 1.0 CO2[c0]	1.0 M_cpd00242_c0 <=> 1.0 M_cpd00001_c0 + 1.0 M_cpd00011_c0		-29.2336	-1.23829	-17.8892	-1.23829	-19.0092	-1.23829	-264.851	-1.23829	-241.547	-1.23829	-21.1046	-0.165321
R_rxn00105_c0	ATP:nicotinamide-nucleotide adenylyltransferase	1.000000 ATP[c0] + 1.000000 Nicotinamide ribonucleotide[c0] <=> 1.000000 PPi[c0] + 1.000000 NAD[c0]	1.000000 M_cpd00002_c0 + 1.000000 M_cpd00355_c0 <=> 1.000000 M_cpd00012_c0 + 1.000000 M_cpd00003_c0		0	0	0	0	0	0	0	0	0	0	0	0
R_rxn00109_c0	ammonia:NAD+ oxidoreductase	1.000000 H2O[c0] + 1.000000 NAD[c0] + 1.000000 NH3[c0] <=> 2.000000 H+[c0] + 1.000000 NADH[c0] + 1.000000 Hydroxylamine[c0]	1.000000 M_cpd00001_c0 + 1.000000 M_cpd00003_c0 + 1.000000 M_cpd00013_c0 <=> 2.000000 M_cpd00067_c0 + 1.000000 M_cpd00004_c0 + 1.000000 M_cpd00165_c0		0	0	0	0	0	0	0	0	0	0	0	0
R_rxn00113_c0	Carbon-dioxide:ammonia ligase (ADP-forming,carbamate-phosphorylating)	2.000000 ATP[c0] + 1.000000 H2O[c0] + 1.000000 CO2[c0] + 1.000000 NH3[c0] <=> 3.000000 H+[c0] + 2.000000 ADP[c0] + 1.000000 Phosphate[c0] + 1.000000 Carbamoylphosphate[c0]	2.000000 M_cpd00002_c0 + 1.000000 M_cpd00001_c0 + 1.000000 M_cpd00011_c0 + 1.000000 M_cpd00013_c0 <=> 3.000000 M_cpd00067_c0 + 2.000000 M_cpd00008_c0 + 1.000000 M_cpd00009_c0 + 1.000000 M_cpd00146_c0		-27.906	7.26386	-16.5616	2.7836	-17.6817	2.7836	-263.523	2.7836	-240.219	7.26386	-20.9273	0.371632
R_rxn00117_c0	ATP:UDP phosphotransferase	1.000000 ATP[c0] + 1.000000 UDP[c0] <=> 1.000000 ADP[c0] + 1.000000 UTP[c0]	1.000000 M_cpd00002_c0 + 1.000000 M_cpd00014_c0 <=> 1.000000 M_cpd00008_c0 + 1.000000 M_cpd00062_c0		0.060517	0.0658057	0.060517	0.0658057	0.060517	0.0658057	0.060517	0.0658057	0.060517	0.0658057	0.0080795	0.00878554
R_rxn00119_c0	ATP:UMP phosphotransferase	1.000000 H+[c0] + 1.000000 ATP[c0] + 1.000000 UMP[c0] <=> 1.000000 ADP[c0] + 1.000000 UDP[c0]	1.000000 M_cpd00067_c0 + 1.000000 M_cpd00002_c0 + 1.000000 M_cpd00091_c0 <=> 1.000000 M_cpd00008_c0 + 1.000000 M_cpd00014_c0		0.0482363	0.0482363	0.0482363	0.0482363	0.0482363	0.0482363	0.0482363	0.0482363	0.0482363	0.0482363	0.00643992	0.0064399
R_rxn00122_c0	ATP:FMN adenylyltransferase	1.000000 ATP[c0] + 1.000000 FMN[c0] => 1.000000 PPi[c0] + 1.000000 FAD[c0]	1.000000 M_cpd00002_c0 + 1.000000 M_cpd00050_c0 => 1.000000 M_cpd00012_c0 + 1.000000 M_cpd00015_c0		6.13535e-05	6.13533e-05	6.13535e-05	6.13533e-05	6.13535e-05	6.13533e-05	6.13535e-05	6.13533e-05	6.13535e-05	6.13533e-05	8.1912e-06	8.1909e-06
R_rxn00124_c0	ATP:pyridoxal 5'-phosphotransferase	1.000000 ATP[c0] + 1.000000 Pyridoxal[c0] <=> 1.000000 H+[c0] + 1.000000 ADP[c0] + 1.000000 Pyridoxal phosphate[c0]	1.000000 M_cpd00002_c0 + 1.000000 M_cpd00215_c0 <=> 1.000000 M_cpd00067_c0 + 1.000000 M_cpd00008_c0 + 1.000000 M_cpd00016_c0		0	0	0	0	0	0	0	0	0	0	0	0
R_rxn00126_c0	ATP:L-methionine S-adenosyltransferase	1.000000 ATP[c0] + 1.000000 H2O[c0] + 1.000000 L-Methionine[c0] => 1.000000 PPi[c0] + 1.000000 H+[c0] + 1.000000 Phosphate[c0] + 1.000000 S-Adenosyl-L-methionine[c0]	1.000000 M_cpd00002_c0 + 1.000000 M_cpd00001_c0 + 1.000000 M_cpd00060_c0 => 1.000000 M_cpd00012_c0 + 1.000000 M_cpd00067_c0 + 1.000000 M_cpd00009_c0 + 1.000000 M_cpd00017_c0		0.0045	0.0045	0.0045	0.0045	0.0045	0.0045	0.0045	0.0045	0.0045	0.343344	0.000600785	0.000600786
R_rxn00127_c0	S-adenosyl-L-methionine carboxy-lyase [(5-deoxy-5-adenosyl)(3-aminopropyl)methylsulfonium-forming]	1.000000 H+[c0] + 1.000000 S-Adenosyl-L-methionine[c0] => 1.000000 CO2[c0] + 1.000000 S-Adenosylmethioninamine[c0]	1.000000 M_cpd00067_c0 + 1.000000 M_cpd00017_c0 => 1.000000 M_cpd00011_c0 + 1.000000 M_cpd00837_c0		0.0009	0.0009	0.0009	0.0009	0.0009	0.0009	0.0009	0.0009	0.0009	0.0009	0.000120157	0.000120157
R_rxn00130_c0	AMP aminohydrolase	1.000000 H+[c0] + 1.000000 H2O[c0] + 1.000000 AMP[c0] <=> 1.000000 IMP[c0] + 1.000000 NH3[c0]	1.000000 M_cpd00067_c0 + 1.000000 M_cpd00001_c0 + 1.000000 M_cpd00018_c0 <=> 1.000000 M_cpd00114_c0 + 1.000000 M_cpd00013_c0		-0.0260885	7.14854	-0.0260885	2.66828	-0.0260885	2.66828	-0.0260885	2.66828	-0.0260885	7.14854	-0.00348302	0.356236
R_rxn00132_c0	Adenosine 5'-monophosphate phosphohydrolase	1.000000 H2O[c0] + 1.000000 AMP[c0] => 1.000000 Phosphate[c0] + 1.000000 Adenosine[c0]	1.000000 M_cpd00001_c0 + 1.000000 M_cpd00018_c0 => 1.000000 M_cpd00009_c0 + 1.000000 M_cpd00182_c0		0	27.9953	0	16.6509	0	17.7709	0	263.613	0	240.308	0	20.9393
R_rxn00134_c0	ATP:adenosine 5'-phosphotransferase	1.000000 ATP[c0] + 1.000000 Adenosine[c0] <=> 1.000000 H+[c0] + 1.000000 ADP[c0] + 1.000000 AMP[c0]	1.000000 M_cpd00002_c0 + 1.000000 M_cpd00182_c0 <=> 1.000000 M_cpd00067_c0 + 1.000000 M_cpd00008_c0 + 1.000000 M_cpd00018_c0		0.0027	27.998	0.0027	16.6536	0.0027	17.7736	0.0027	263.615	0.0027	240.311	0.000360471	20.9396
R_rxn00138_c0	deamido-NAD+:ammonia ligase (AMP-forming)	1.000000 ATP[c0] + 1.000000 NH3[c0] + 1.000000 Deamido-NAD[c0] => 1.000000 PPi[c0] + 2.000000 H+[c0] + 1.000000 AMP[c0] + 1.000000 NAD[c0]	1.000000 M_cpd00002_c0 + 1.000000 M_cpd00013_c0 + 1.000000 M_cpd00638_c0 => 1.000000 M_cpd00012_c0 + 2.000000 M_cpd00067_c0 + 1.000000 M_cpd00018_c0 + 1.000000 M_cpd00003_c0		0	-3e-10	0	-4e-10	0	-4e-10	0	-4e-10	0	-3e-10	0	1e-10
R_rxn00139_c0	AMP:diphosphate phospho-D-ribosyltransferase	1.000000 PRPP[c0] + 1.000000 Adenine[c0] => 1.000000 PPi[c0] + 1.000000 H+[c0] + 1.000000 AMP[c0]	1.000000 M_cpd00103_c0 + 1.000000 M_cpd00128_c0 => 1.000000 M_cpd00012_c0 + 1.000000 M_cpd00067_c0 + 1.000000 M_cpd00018_c0		0.0009	0.0009	0.0009	0.0009	0.0009	0.0009	0.0009	0.0009	0.0009	0.0009	0.000120157	0.000120157
R_rxn00140_c0	adenosine 3',5'-phosphate 5'-nucleotidohydrolase	1.000000 H2O[c0] + 1.000000 cAMP[c0] <=> 1.000000 H+[c0] + 1.000000 AMP[c0]	1.000000 M_cpd00001_c0 + 1.000000 M_cpd00446_c0 <=> 1.000000 M_cpd00067_c0 + 1.000000 M_cpd00018_c0		0	13.9976	0	8.32544	0	8.88547	0	131.806	0	124.27	0	10.4696
R_rxn00141_c0	S-Adenosyl-L-homocysteine hydrolase	1.000000 H2O[c0] + 1.000000 S-Adenosyl-homocysteine[c0] <=> 1.000000 Homocysteine[c0] + 1.000000 Adenosine[c0]	1.000000 M_cpd00001_c0 + 1.000000 M_cpd00019_c0 <=> 1.000000 M_cpd00135_c0 + 1.000000 M_cpd00182_c0		0.0027	0.0027	0.0027	0.0027	0.0027	0.0027	0.0027	0.0027	0.0027	0.341544	0.000360471	0.000360472
R_rxn00148_c0	ATP:pyruvate 2-O-phosphotransferase	1.000000 ATP[c0] + 1.000000 Pyruvate[c0] <=> 1.000000 H+[c0] + 1.000000 ADP[c0] + 1.000000 Phosphoenolpyruvate[c0]	1.000000 M_cpd00002_c0 + 1.000000 M_cpd00020_c0 <=> 1.000000 M_cpd00067_c0 + 1.000000 M_cpd00008_c0 + 1.000000 M_cpd00061_c0		-31.0296	24.9609	-19.6852	13.6165	-20.8053	14.7366	-266.647	260.578	-245.722	238.33	-21.3444	20.5341
R_rxn00162_c0	oxaloacetate carboxy-lyase (pyruvate-forming)	1.000000 H+[c0] + 1.000000 Oxaloacetate[c0] => 1.000000 Pyruvate[c0] + 1.000000 CO2[c0]	1.000000 M_cpd00067_c0 + 1.000000 M_cpd00032_c0 => 1.000000 M_cpd00020_c0 + 1.000000 M_cpd00011_c0		0	27.9953	0	16.6509	0	17.7709	0	263.613	0	240.308	0	20.9393
R_rxn00177_c0	(3S)-citramalyl-CoA pyruvate-lyase (acetyl-CoA-forming)	1.000000 L-Citramalyl-CoA[c0] <=> 1.000000 H+[c0] + 1.000000 Acetyl-CoA[c0] + 1.000000 Pyruvate[c0]	1.000000 M_cpd00743_c0 <=> 1.000000 M_cpd00067_c0 + 1.000000 M_cpd00022_c0 + 1.000000 M_cpd00020_c0		0	0	0	0	0	0	0	0	0	0	0	0
R_rxn00178_c0	Acetyl-CoA:acetyl-CoA C-acetyltransferase	2 Acetyl-CoA[c0] <=> 1 CoA[c0] + 1 Acetoacetyl-CoA[c0]	2 M_cpd00022_c0 <=> 1 M_cpd00010_c0 + 1 M_cpd00279_c0		0	0	0	0	0	0	0	0	0	0	0	0
R_rxn00179_c0	ATP:L-glutamate 5-phosphotransferase	1.000000 ATP[c0] + 1.000000 L-Glutamate[c0] <=> 1.000000 ADP[c0] + 1.000000 L-Glutamyl 5-phosphate[c0]	1.000000 M_cpd00002_c0 + 1.000000 M_cpd00023_c0 <=> 1.000000 M_cpd00008_c0 + 1.000000 M_cpd02097_c0		0	27.9953	0	16.6509	0	17.7709	0	263.613	0	240.308	0	20.9393
R_rxn00181_c0	ATP:L-glutamate 1-phosphotransferase	1.000000 H+[c0] + 1.000000 ATP[c0] + 1.000000 L-Glutamate[c0] <=> 1.000000 ADP[c0] + 1.000000 L-Glutamyl 1-phosphate[c0]	1.000000 M_cpd00067_c0 + 1.000000 M_cpd00002_c0 + 1.000000 M_cpd00023_c0 <=> 1.000000 M_cpd00008_c0 + 1.000000 M_cpd03413_c0		0	0	0	0	0	0	0	0	0	0	0	0
R_rxn00183_c0	L-Glutamate 5-semialdehyde:NAD+ oxidoreductase	1.000000 H2O[c0] + 1.000000 NAD[c0] + 1.000000 L-Glutamate5-semialdehyde[c0] => 2.000000 H+[c0] + 1.000000 L-Glutamate[c0] + 1.000000 NADH[c0]	1.000000 M_cpd00001_c0 + 1.000000 M_cpd00003_c0 + 1.000000 M_cpd00858_c0 => 2.000000 M_cpd00067_c0 + 1.000000 M_cpd00023_c0 + 1.000000 M_cpd00004_c0		0	27.9953	0	16.6509	0	17.7709	0	263.613	0	240.308	0	20.9393
R_rxn00187_c0	L-Glutamate:ammonia ligase (ADP-forming)	1.000000 ATP[c0] + 1.000000 L-Glutamate[c0] + 1.000000 NH3[c0] => 1.000000 H+[c0] + 1.000000 ADP[c0] + 1.000000 Phosphate[c0] + 1.000000 L-Glutamine[c0]	1.000000 M_cpd00002_c0 + 1.000000 M_cpd00023_c0 + 1.000000 M_cpd00013_c0 => 1.000000 M_cpd00067_c0 + 1.000000 M_cpd00008_c0 + 1.000000 M_cpd00009_c0 + 1.000000 M_cpd00053_c0		0.147271	28.1426	0.147271	16.7982	0.147271	17.9182	0.147271	263.76	0.147271	240.456	0.0196618	20.9589
R_rxn00189_c0	L-Glutamine amidohydrolase	1.000000 H2O[c0] + 1.000000 L-Glutamine[c0] => 1.000000 L-Glutamate[c0] + 1.000000 NH3[c0]	1.000000 M_cpd00001_c0 + 1.000000 M_cpd00053_c0 => 1.000000 M_cpd00023_c0 + 1.000000 M_cpd00013_c0		0	27.9953	0	16.6509	0	17.7709	0	263.613	0	240.308	0	20.9393
R_rxn00190_c0	Deamido-NAD+:L-glutamine amido-ligase (AMP-forming)	1.000000 ATP[c0] + 1.000000 H2O[c0] + 1.000000 L-Glutamine[c0] + 1.000000 Deamido-NAD[c0] => 1.000000 PPi[c0] + 2.000000 H+[c0] + 1.000000 AMP[c0] + 1.000000 L-Glutamate[c0] + 1.000000 NAD[c0]	1.000000 M_cpd00002_c0 + 1.000000 M_cpd00001_c0 + 1.000000 M_cpd00053_c0 + 1.000000 M_cpd00638_c0 => 1.000000 M_cpd00012_c0 + 2.000000 M_cpd00067_c0 + 1.000000 M_cpd00018_c0 + 1.000000 M_cpd00023_c0 + 1.000000 M_cpd00003_c0		0	-3e-10	0	-4e-10	0	-4e-10	0	-4e-10	0	-3e-10	0	1e-10
R_rxn00192_c0	acetyl-CoA:L-glutamate N-acetyltransferase	1.000000 Acetyl-CoA[c0] + 1.000000 L-Glutamate[c0] => 1.000000 H+[c0] + 1.000000 CoA[c0] + 1.000000 N-Acetyl-L-glutamate[c0]	1.000000 M_cpd00022_c0 + 1.000000 M_cpd00023_c0 => 1.000000 M_cpd00067_c0 + 1.000000 M_cpd00010_c0 + 1.000000 M_cpd00477_c0		0	0	0	0	0	0	0	0	0	0	0	0
R_rxn00202_c0	acetyl-CoA:2-oxoglutarate C-acetyltransferase (thioester-hydrolysing, carboxymethyl forming)	1.000000 H2O[c0] + 1.000000 Acetyl-CoA[c0] + 1.000000 2-Oxoglutarate[c0] => 1.000000 H+[c0] + 1.000000 CoA[c0] + 1.000000 Homocitrate[c0]	1.000000 M_cpd00001_c0 + 1.000000 M_cpd00022_c0 + 1.000000 M_cpd00024_c0 => 1.000000 M_cpd00067_c0 + 1.000000 M_cpd00010_c0 + 1.000000 M_cpd00919_c0		0	0	0	0	0	0	0	0	0	0	0	0
R_rxn00206_c0	superoxide:superoxide oxidoreductase	2.000000 H+[c0] + 2.000000 O2-[c0] => 1.000000 O2[c0] + 1.000000 H2O2[c0]	2.000000 M_cpd00067_c0 + 2.000000 M_cpd00532_c0 => 1.000000 M_cpd00007_c0 + 1.000000 M_cpd00025_c0		0	0	0	0	0	0	0	0	0	0	0	0
R_rxn00211_c0	UDP-glucose:NAD+ 6-oxidoreductase	1.000000 H2O[c0] + 2.000000 NAD[c0] + 1.000000 UDP-glucose[c0] <=> 3.000000 H+[c0] + 2.000000 NADH[c0] + 1.000000 UDPglucuronate[c0]	1.000000 M_cpd00001_c0 + 2.000000 M_cpd00003_c0 + 1.000000 M_cpd00026_c0 <=> 3.000000 M_cpd00067_c0 + 2.000000 M_cpd00004_c0 + 1.000000 M_cpd00144_c0		0	0	0	0	0	0	0	0	0	0	0	0
R_rxn00213_c0	UTP:alpha-D-glucose-1-phosphate uridylyltransferase	1.000000 Glucose-1-phosphate[c0] + 1.000000 UTP[c0] <=> 1.000000 PPi[c0] + 1.000000 UDP-glucose[c0]	1.000000 M_cpd00089_c0 + 1.000000 M_cpd00062_c0 <=> 1.000000 M_cpd00012_c0 + 1.000000 M_cpd00026_c0		0.00223104	0.00223104	0.00223104	0.00223104	0.00223104	0.00223104	0.00223104	0.00223104	0.00223104	0.00223104	0.000297862	0.000297852
R_rxn00214_c0	UDP-glucose 4-epimerase	1.000000 UDP-glucose[c0] <=> 1.000000 UDP-galactose[c0]	1.000000 M_cpd00026_c0 <=> 1.000000 M_cpd00043_c0		0	0	0	0	0	0	0	0	0	0	0	0
R_rxn00216_c0	ATP:D-glucose 6-phosphotransferase	1.000000 ATP[c0] + 1.000000 D-Glucose[c0] <=> 1.000000 H+[c0] + 1.000000 ADP[c0] + 1.000000 D-glucose-6-phosphate[c0]	1.000000 M_cpd00002_c0 + 1.000000 M_cpd00027_c0 <=> 1.000000 M_cpd00067_c0 + 1.000000 M_cpd00008_c0 + 1.000000 M_cpd00079_c0		-0.011713	-0.011713	-0.011713	-0.011713	-0.011713	-0.011713	-0.011713	-0.011713	-0.011713	-0.011713	-0.00156377	-0.00156377
R_rxn00222_c0	cellobiose glucohydrolase	1.000000 H2O[c0] + 1.000000 CELB[c0] => 2.000000 D-Glucose[c0]	1.000000 M_cpd00001_c0 + 1.000000 M_cpd00158_c0 => 2.000000 M_cpd00027_c0		0	0	0	0	0	0	0	0	0	0	0	0
R_rxn00224_c0	protoheme ferro-lyase (protoporphyrin-forming)	1.000000 Fe+2[c0] + 1.000000 Protoporphyrin[c0] <=> 2.000000 H+[c0] + 1.000000 Heme[c0]	1.000000 M_cpd10515_c0 + 1.000000 M_cpd01476_c0 <=> 2.000000 M_cpd00067_c0 + 1.000000 M_cpd00028_c0		0.0009	0.0009	0.0009	0.0009	0.0009	0.0009	0.0009	0.0009	0.0009	0.0009	0.000120157	0.000120157
R_rxn00225_c0	ATP:acetate phosphotransferase	1.000000 ATP[c0] + 1.000000 Acetate[c0] <=> 1.000000 ADP[c0] + 1.000000 Acetylphosphate[c0]	1.000000 M_cpd00002_c0 + 1.000000 M_cpd00029_c0 <=> 1.000000 M_cpd00008_c0 + 1.000000 M_cpd00196_c0		2.09281	31.9119	6.57307	23.224	6.57307	24.344	6.57307	270.186	2.09281	244.86	0.877557	21.8168
R_rxn00227_c0	Acetyl phosphate phosphohydrolase	1.000000 H2O[c0] + 1.000000 Acetylphosphate[c0] => 1.000000 H+[c0] + 1.000000 Phosphate[c0] + 1.000000 Acetate[c0]	1.000000 M_cpd00001_c0 + 1.000000 M_cpd00196_c0 => 1.000000 M_cpd00067_c0 + 1.000000 M_cpd00009_c0 + 1.000000 M_cpd00029_c0		0	27.9953	0	16.6509	0	17.7709	0	263.613	0	240.308	0	20.9393
R_rxn00237_c0	ATP:GDP phosphotransferase	1.000000 ATP[c0] + 1.000000 GDP[c0] <=> 1.000000 ADP[c0] + 1.000000 GTP[c0]	1.000000 M_cpd00002_c0 + 1.000000 M_cpd00031_c0 <=> 1.000000 M_cpd00008_c0 + 1.000000 M_cpd00038_c0		0.0173265	33.3634	0.0173265	19.3626	0.0173265	20.4826	0.0173265	266.324	0.0173265	244.883	0.00231322	21.3013
R_rxn00239_c0	ATP:GMP phosphotransferase	1.000000 H+[c0] + 1.000000 ATP[c0] + 1.000000 GMP[c0] <=> 1.000000 ADP[c0] + 1.000000 GDP[c0]	1.000000 M_cpd00067_c0 + 1.000000 M_cpd00002_c0 + 1.000000 M_cpd00126_c0 <=> 1.000000 M_cpd00008_c0 + 1.000000 M_cpd00031_c0		0.0173265	0.0173265	0.0173265	0.0173265	0.0173265	0.0173265	0.0173265	0.0173265	0.0173265	0.0173265	0.00231322	0.00231321
R_rxn00242_c0	guanosine-3',5'-bis(diphosphate) 3'-diphosphohydrolase	1.000000 H2O[c0] + 1.000000 Guanosine 3',5'-bis(diphosphate)[c0] => 1.000000 PPi[c0] + 1.000000 GDP[c0]	1.000000 M_cpd00001_c0 + 1.000000 M_cpd00905_c0 => 1.000000 M_cpd00012_c0 + 1.000000 M_cpd00031_c0		0	0	0	0	0	0	0	0	0	0	0	0
R_rxn00248_c0	(S)-malate:NAD+ oxidoreductase	1.000000 NAD[c0] + 1.000000 L-Malate[c0] <=> 1.000000 H+[c0] + 1.000000 NADH[c0] + 1.000000 Oxaloacetate[c0]	1.000000 M_cpd00003_c0 + 1.000000 M_cpd00130_c0 <=> 1.000000 M_cpd00067_c0 + 1.000000 M_cpd00004_c0 + 1.000000 M_cpd00032_c0		0.158808	7.33344	0.158808	2.85317	0.158808	2.85317	-2.54996	2.85317	-7.03022	11.8137	0.0212021	0.380921
R_rxn00256_c0	acetyl-CoA:oxaloacetate C-acetyltransferase (thioester-hydrolysing)	1.000000 H2O[c0] + 1.000000 Acetyl-CoA[c0] + 1.000000 Oxaloacetate[c0] => 1.000000 H+[c0] + 1.000000 CoA[c0] + 1.000000 Citrate[c0]	1.000000 M_cpd00001_c0 + 1.000000 M_cpd00022_c0 + 1.000000 M_cpd00032_c0 => 1.000000 M_cpd00067_c0 + 1.000000 M_cpd00010_c0 + 1.000000 M_cpd00137_c0		0.308261	0.308261	0.308261	0.308261	0.308261	0.308261	0.293861	0.308261	0.293861	4.78853	0.0411553	0.0411553
R_rxn00258_c0	Malonyl-CoA:pyruvate carboxytransferase	1.000000 Pyruvate[c0] + 1.000000 Malonyl-CoA[c0] <=> 1.000000 Acetyl-CoA[c0] + 1.000000 Oxaloacetate[c0]	1.000000 M_cpd00020_c0 + 1.000000 M_cpd00070_c0 <=> 1.000000 M_cpd00022_c0 + 1.000000 M_cpd00032_c0		0.507602	28.5029	0.507602	17.1585	0.507602	18.2786	0.507602	264.12	0.507602	240.816	0.0677689	21.007
R_rxn00259_c0	(3S)-citryl-CoA oxaloacetate-lyase (acetyl-CoA-forming)	1.000000 (3S)-Citryl-CoA[c0] <=> 1.000000 H+[c0] + 1.000000 Acetyl-CoA[c0] + 1.000000 Oxaloacetate[c0]	1.000000 M_cpd00442_c0 <=> 1.000000 M_cpd00067_c0 + 1.000000 M_cpd00022_c0 + 1.000000 M_cpd00032_c0		0	0	0	0	0	0	0	0	0	0	0	0
R_rxn00260_c0	L-Aspartate:2-oxoglutarate aminotransferase	1.000000 L-Aspartate[c0] + 1.000000 2-Oxoglutarate[c0] <=> 1.000000 L-Glutamate[c0] + 1.000000 Oxaloacetate[c0]	1.000000 M_cpd00041_c0 + 1.000000 M_cpd00024_c0 <=> 1.000000 M_cpd00023_c0 + 1.000000 M_cpd00032_c0		-7.53278	-0.358149	-3.05251	-0.358149	-3.05251	-0.358149	-3.05251	-0.358149	-7.53278	-0.358149	-0.407535	-0.0478157
R_rxn00262_c0	L-Aspartic acid:oxygen oxidoreductase (deaminating)	1.000000 H2O[c0] + 1.000000 L-Aspartate[c0] + 1.000000 O2[c0] => 1.000000 Oxaloacetate[c0] + 1.000000 NH3[c0] + 1.000000 H2O2[c0]	1.000000 M_cpd00001_c0 + 1.000000 M_cpd00041_c0 + 1.000000 M_cpd00007_c0 => 1.000000 M_cpd00032_c0 + 1.000000 M_cpd00013_c0 + 1.000000 M_cpd00025_c0		0	-4.55e-08	0	-4.55e-08	0	-4.55e-08	0	2.69436	0	7.17463	0	1.58e-08
R_rxn00269_c0	glycine:oxygen oxidoreductase (deaminating)	1.000000 Glycine[c0] + 1.000000 H2O[c0] + 1.000000 O2[c0] => 1.000000 NH3[c0] + 1.000000 H2O2[c0] + 1.000000 Glyoxalate[c0]	1.000000 M_cpd00033_c0 + 1.000000 M_cpd00001_c0 + 1.000000 M_cpd00007_c0 => 1.000000 M_cpd00013_c0 + 1.000000 M_cpd00025_c0 + 1.000000 M_cpd00040_c0		0	-4.55e-08	0	-4.55e-08	0	-4.55e-08	0	2.69436	0	7.17463	0	1.58e-08
R_rxn00274_c0	Acetyl-CoA:glycine C-acetyltransferase	1.000000 Glycine[c0] + 1.000000 Acetyl-CoA[c0] <=> 1.000000 CoA[c0] + 1.000000 L-2-Amino-acetoacetate[c0]	1.000000 M_cpd00033_c0 + 1.000000 M_cpd00022_c0 <=> 1.000000 M_cpd00010_c0 + 1.000000 M_cpd02211_c0		0.0829669	0.0829669	0.0829669	0.0829669	0.0829669	0.0829669	-2.6114	0.0829669	-7.09166	0.0829669	0.0110767	0.0110767
R_rxn00278_c0	L-Alanine:NAD+ oxidoreductase (deaminating)	1.000000 H2O[c0] + 1.000000 NAD[c0] + 1.000000 L-Alanine[c0] <=> 1.000000 H+[c0] + 1.000000 Pyruvate[c0] + 1.000000 NADH[c0] + 1.000000 NH3[c0]	1.000000 M_cpd00001_c0 + 1.000000 M_cpd00003_c0 + 1.000000 M_cpd00035_c0 <=> 1.000000 M_cpd00067_c0 + 1.000000 M_cpd00020_c0 + 1.000000 M_cpd00004_c0 + 1.000000 M_cpd00013_c0		-0.183503	-0.183503	-0.183503	-0.183503	-0.183503	-0.183503	-0.183503	-0.183503	-0.183503	-0.183503	-0.0244991	-0.0244991
R_rxn00283_c0	alanine racemase	1.000000 L-Alanine[c0] <=> 1.000000 D-Alanine[c0]	1.000000 M_cpd00035_c0 <=> 1.000000 M_cpd00117_c0		0.044342	0.044342	0.044342	0.044342	0.044342	0.044342	0.044342	0.044342	0.044342	0.044342	0.00592	0.00591999
R_rxn00285_c0	Succinate:CoA ligase (ADP-forming)	1.000000 ATP[c0] + 1.000000 CoA[c0] + 1.000000 Succinate[c0] <=> 1.000000 ADP[c0] + 1.000000 Phosphate[c0] + 1.000000 Succinyl-CoA[c0]	1.000000 M_cpd00002_c0 + 1.000000 M_cpd00010_c0 + 1.000000 M_cpd00036_c0 <=> 1.000000 M_cpd00008_c0 + 1.000000 M_cpd00009_c0 + 1.000000 M_cpd00078_c0		4.55e-08	14.9096	1.76e-08	8.32544	1.76e-08	8.88547	1.76e-08	131.806	-4.48027	120.242	-5.9e-09	10.4696
R_rxn00288_c0	Succinate:(acceptor) oxidoreductase	1.000000 Fumarate[c0] + 1.000000 FADH2[c0] => 1.000000 H+[c0] + 1.000000 FAD[c0] + 1.000000 Succinate[c0]	1.000000 M_cpd00106_c0 + 1.000000 M_cpd00982_c0 => 1.000000 M_cpd00067_c0 + 1.000000 M_cpd00015_c0 + 1.000000 M_cpd00036_c0		0	-4.54e-08	0	-4.55e-08	0	-4.55e-08	0	30.9899	0	26.4293	0	1.58e-08
R_rxn00292_c0	UDP-N-acetyl-D-glucosamine 2-epimerase	1 H2O[c0] + 1 UDP-N-acetylglucosamine[c0] => 1 UDP[c0] + 1 N-Acetyl-D-mannosamine[c0]	1 M_cpd00001_c0 + 1 M_cpd00037_c0 => 1 M_cpd00014_c0 + 1 M_cpd00492_c0		0	0	0	0	0	0	0	0	0	0	0	0
R_rxn00293_c0	UTP:N-acetyl-alpha-D-glucosamine-1-phosphate uridylyltransferase	1.000000 UTP[c0] + 1.000000 N-Acetyl-D-glucosamine1-phosphate[c0] <=> 1.000000 PPi[c0] + 1.000000 UDP-N-acetylglucosamine[c0]	1.000000 M_cpd00062_c0 + 1.000000 M_cpd02611_c0 <=> 1.000000 M_cpd00012_c0 + 1.000000 M_cpd00037_c0		0.0306768	0.0306768	0.0306768	0.0306768	0.0306768	0.0306768	0.0306768	0.0306768	0.0306768	0.0306768	0.0040956	0.00409559
R_rxn00295_c0	UDP-N-acetyl-D-glucosamine 4-epimerase	1.000000 UDP-N-acetylglucosamine[c0] <=> 1.000000 UDP-N-acetyl-D-galactosamine[c0]	1.000000 M_cpd00037_c0 <=> 1.000000 M_cpd00175_c0		0	0	0	0	0	0	0	0	0	0	0	0
R_rxn00298_c0	UDP-N-acetyl-D-glucosamine:NAD+ 6-oxidoreductase	1 H2O[c0] + 2 NAD[c0] + 1 UDP-N-acetylglucosamine[c0] <=> 2 NADH[c0] + 3 H+[c0] + 1 UDP-N-acetyl-D-glucosaminouronate[c0]	1 M_cpd00001_c0 + 2 M_cpd00003_c0 + 1 M_cpd00037_c0 <=> 2 M_cpd00004_c0 + 3 M_cpd00067_c0 + 1 M_cpd02782_c0		0	0	0	0	0	0	0	0	0	0	0	0
R_rxn00299_c0	GTP 7,8-8,9-dihydrolase	1.000000 H2O[c0] + 1.000000 GTP[c0] => 1.000000 H+[c0] + 1.000000 Formate[c0] + 1.000000 7,8-Dihydroneopterin 3'-triphosphate[c0]	1.000000 M_cpd00001_c0 + 1.000000 M_cpd00038_c0 => 1.000000 M_cpd00067_c0 + 1.000000 M_cpd00047_c0 + 1.000000 M_cpd02978_c0		0	0.0027	0	0.0027	0	0.0027	0	0.0027	0	0.0027	0	0.00036047
R_rxn00300_c0	GTP 7,8-8,9-dihydrolase (diphosphate-forming)	3.000000 H2O[c0] + 1.000000 GTP[c0] => 1.000000 PPi[c0] + 3.000000 H+[c0] + 1.000000 Formate[c0] + 1.000000 2,5-Diamino-6-(5'-phosphoribosylamino)-4-pyrimidineone[c0]	3.000000 M_cpd00001_c0 + 1.000000 M_cpd00038_c0 => 1.000000 M_cpd00012_c0 + 3.000000 M_cpd00067_c0 + 1.000000 M_cpd00047_c0 + 1.000000 M_cpd00957_c0		6.13702e-05	6.137e-05	6.13702e-05	6.13698e-05	6.13702e-05	6.13698e-05	6.13702e-05	6.13698e-05	6.13702e-05	6.13698e-05	8.1934e-06	8.1928e-06
R_rxn00302_c0	GTP 8,9-hydrolase	1.000000 H2O[c0] + 1.000000 GTP[c0] => 1.000000 Formamidopyrimidine nucleoside triphosphate[c0]	1.000000 M_cpd00001_c0 + 1.000000 M_cpd00038_c0 => 1.000000 M_cpd03518_c0		0	0.0027	0	0.0027	0	0.0027	0	0.0027	0	0.0027	0	0.00036047
R_rxn00303_c0	ATP:GTP 3'-diphosphotransferase	1.000000 ATP[c0] + 1.000000 GTP[c0] <=> 2.000000 H+[c0] + 1.000000 AMP[c0] + 1.000000 Guanosine 5'-triphosphate,3'-diphosphate[c0]	1.000000 M_cpd00002_c0 + 1.000000 M_cpd00038_c0 <=> 2.000000 M_cpd00067_c0 + 1.000000 M_cpd00018_c0 + 1.000000 M_cpd02740_c0		0	0	0	0	0	0	0	0	0	0	0	0
R_rxn00305_c0	GTP:oxaloacetate carboxy-lyase (adding GTP;phosphoenolpyruvate-forming)	1.000000 GTP[c0] + 1.000000 Oxaloacetate[c0] => 1.000000 CO2[c0] + 1.000000 GDP[c0] + 1.000000 Phosphoenolpyruvate[c0]	1.000000 M_cpd00038_c0 + 1.000000 M_cpd00032_c0 => 1.000000 M_cpd00011_c0 + 1.000000 M_cpd00031_c0 + 1.000000 M_cpd00061_c0		0	27.9953	0	16.6509	0	17.7709	0	263.613	0	240.308	0	20.9393
R_rxn00310_c0	L-lysine:oxygen 2-oxidoreductase (deaminating)	1 H2O[c0] + 1 O2[c0] + 1 L-Lysine[c0] => 1 NH3[c0] + 1 H2O2[c0] + 1 2-Oxo-6-aminocaproate[c0]	1 M_cpd00001_c0 + 1 M_cpd00007_c0 + 1 M_cpd00039_c0 => 1 M_cpd00013_c0 + 1 M_cpd00025_c0 + 1 M_cpd02074_c0		0	0	0	0	0	0	0	0	0	0	0	0
R_rxn00313_c0	meso-2,6-diaminoheptanedioate carboxy-lyase (L-lysine-forming)	1.000000 H+[c0] + 1.000000 meso-2,6-Diaminopimelate[c0] <=> 1.000000 CO2[c0] + 1.000000 L-Lysine[c0]	1.000000 M_cpd00067_c0 + 1.000000 M_cpd00516_c0 <=> 1.000000 M_cpd00011_c0 + 1.000000 M_cpd00039_c0		0.0697201	0.0697201	0.0697201	0.0697201	0.0697201	0.0697201	0.0697201	0.0697201	0.0697201	0.0697201	0.00930818	0.00930815
R_rxn00314_c0	N2-(D-1-carboxylethyl)-L-lysine:NADP+ oxidoreductase (L-lysine-forming)	1.000000 H2O[c0] + 1.000000 NADP[c0] + 1.000000 Lysopine[c0] <=> 1.000000 H+[c0] + 1.000000 Pyruvate[c0] + 1.000000 NADPH[c0] + 1.000000 L-Lysine[c0]	1.000000 M_cpd00001_c0 + 1.000000 M_cpd00006_c0 + 1.000000 M_cpd02490_c0 <=> 1.000000 M_cpd00067_c0 + 1.000000 M_cpd00020_c0 + 1.000000 M_cpd00005_c0 + 1.000000 M_cpd00039_c0		0	0	0	0	0	0	0	0	0	0	0	0
R_rxn00320_c0	lysine racemase	1 L-Lysine[c0] <=> 1 D-Lysine[c0]	1 M_cpd00039_c0 <=> 1 M_cpd00549_c0		0	0	0	0	0	0	0	0	0	0	0	0
R_rxn00321_c0	L-Lysine 2,3-aminomutase	1.000000 L-Lysine[c0] <=> 1.000000 L-beta-Lysine[c0]	1.000000 M_cpd00039_c0 <=> 1.000000 M_cpd00840_c0		0	0	0	0	0	0	0	0	0	0	0	0
R_rxn00328_c0	4-hydroxy-2-oxoglutarate glyoxylate-lyase (pyruvate-forming)	1.000000 4-Hydroxy-2-oxoglutarate[c0] <=> 1.000000 Pyruvate[c0] + 1.000000 Glyoxalate[c0]	1.000000 M_cpd00830_c0 <=> 1.000000 M_cpd00020_c0 + 1.000000 M_cpd00040_c0		0	0	0	0	0	0	0	0	0	0	0	0
R_rxn00331_c0	(3S)-3-carboxy-3-hydroxypropanoyl-CoA glyoxylate-lyase (acetyl-CoA-forming)	1.000000 Malyl-CoA[c0] <=> 1.000000 Acetyl-CoA[c0] + 1.000000 Glyoxalate[c0]	1.000000 M_cpd02662_c0 <=> 1.000000 M_cpd00022_c0 + 1.000000 M_cpd00040_c0		0	-2.27e-08	0	-2.27e-08	0	-2.27e-08	0	2.69436	0	7.17463	0	7.9e-09
R_rxn00337_c0	ATP:L-aspartate 4-phosphotransferase	1.000000 ATP[c0] + 1.000000 L-Aspartate[c0] <=> 1.000000 ADP[c0] + 1.000000 4-Phospho-L-aspartate[c0]	1.000000 M_cpd00002_c0 + 1.000000 M_cpd00041_c0 <=> 1.000000 M_cpd00008_c0 + 1.000000 M_cpd01977_c0		0.120707	0.120707	0.120707	0.120707	0.120707	0.120707	0.120707	2.81507	0.120707	7.29534	0.0161153	0.0161153
R_rxn00338_c0	L-aspartate:oxygen oxidoreductase	1.000000 L-Aspartate[c0] + 1.000000 O2[c0] => 1.000000 H+[c0] + 1.000000 H2O2[c0] + 1.000000 Iminoaspartate[c0]	1.000000 M_cpd00041_c0 + 1.000000 M_cpd00007_c0 => 1.000000 M_cpd00067_c0 + 1.000000 M_cpd00025_c0 + 1.000000 M_cpd03470_c0		0	-3e-10	0	-4e-10	0	-4e-10	0	-4e-10	0	-3e-10	0	1e-10
R_rxn00340_c0	L-aspartate:ammonia ligase (AMP-forming)	1.0 ATP[c0] + 1.0 L-Aspartate[c0] + 1.0 NH3[c0] => 1.0 AMP[c0] + 1.0 PPi[c0] + 1.0 L-Asparagine[c0] + 2.0 H+[c0]	1.0 M_cpd00002_c0 + 1.0 M_cpd00041_c0 + 1.0 M_cpd00013_c0 => 1.0 M_cpd00018_c0 + 1.0 M_cpd00012_c0 + 1.0 M_cpd00132_c0 + 2.0 M_cpd00067_c0		0	14.0308	0	8.35863	0	8.91866	0	131.839	0	124.304	0	10.4741
R_rxn00342_c0	L-Asparagine amidohydrolase	1.000000 H2O[c0] + 1.000000 L-Asparagine[c0] => 1.000000 L-Aspartate[c0] + 1.000000 NH3[c0]	1.000000 M_cpd00001_c0 + 1.000000 M_cpd00132_c0 => 1.000000 M_cpd00041_c0 + 1.000000 M_cpd00013_c0		0	13.9976	0	8.32544	0	8.88547	0	131.806	0	124.27	0	10.4696
R_rxn00343_c0	3-Cyano-L-alanine aminohydrolase	2 H2O[c0] + 1 L-3-Cyanoalanine[c0] => 1 NH3[c0] + 1 L-Aspartate[c0]	2 M_cpd00001_c0 + 1 M_cpd01651_c0 => 1 M_cpd00013_c0 + 1 M_cpd00041_c0		0	13.9976	0	8.32544	0	8.88547	0	131.806	0	124.27	0	10.4696
R_rxn00345_c0	N-Acetyl-L-aspartate amidohydrolase	1.000000 H2O[c0] + 1.000000 N-Acetyl-L-aspartate[c0] <=> 1.000000 L-Aspartate[c0] + 1.000000 Acetate[c0]	1.000000 M_cpd00001_c0 + 1.000000 M_cpd00767_c0 <=> 1.000000 M_cpd00041_c0 + 1.000000 M_cpd00029_c0		0	0	0	0	0	0	0	0	0	0	0	0
R_rxn00346_c0	L-aspartate 1-carboxy-lyase (beta-alanine-forming)	1.000000 H+[c0] + 1.000000 L-Aspartate[c0] => 1.000000 CO2[c0] + 1.000000 beta-Alanine[c0]	1.000000 M_cpd00067_c0 + 1.000000 M_cpd00041_c0 => 1.000000 M_cpd00011_c0 + 1.000000 M_cpd00085_c0		0	2e-10	0	2e-10	0	2e-10	0	2e-10	0	2e-10	0	-2e-10
R_rxn00350_c0	glutathione gamma-glutamylaminopeptidase	1.000000 GSH[c0] + 1.000000 H2O[c0] <=> 1.000000 L-Glutamate[c0] + 1.000000 Cys-Gly[c0]	1.000000 M_cpd00042_c0 + 1.000000 M_cpd00001_c0 <=> 1.000000 M_cpd00023_c0 + 1.000000 M_cpd01017_c0		-0.0009	13.9967	-0.0009	8.32454	-0.0009	8.88457	-0.0009	131.805	-0.0009	120.153	-0.000120157	10.4695
R_rxn00351_c0	gamma-L-glutamyl-L-cysteine:glycine ligase (ADP-forming)	1.000000 ATP[c0] + 1.000000 Glycine[c0] + 1.000000 gamma-Glutamylcysteine[c0] => 1.000000 H+[c0] + 1.000000 ADP[c0] + 1.000000 Phosphate[c0] + 1.000000 GSH[c0]	1.000000 M_cpd00002_c0 + 1.000000 M_cpd00033_c0 + 1.000000 M_cpd00506_c0 => 1.000000 M_cpd00067_c0 + 1.000000 M_cpd00008_c0 + 1.000000 M_cpd00009_c0 + 1.000000 M_cpd00042_c0		0	13.9976	0	8.32544	0	8.88547	0	131.806	0	120.154	0	10.4696
R_rxn00361_c0	ATP:adenylylsulfate 3'-phosphotransferase	1.000000 ATP[c0] + 1.000000 APS[c0] <=> 1.000000 H+[c0] + 1.000000 ADP[c0] + 1.000000 3-phosphoadenylylsulfate[c0]	1.000000 M_cpd00002_c0 + 1.000000 M_cpd00193_c0 <=> 1.000000 M_cpd00067_c0 + 1.000000 M_cpd00008_c0 + 1.000000 M_cpd00044_c0		-0.0009	-0.0009	-0.0009	-0.0009	-0.0009	-0.0009	-0.0009	-0.0009	-0.0009	-0.0009	-0.000120157	-0.000120157
R_rxn00363_c0	Cytidine-5'-monophosphate phosphohydrolase	1.000000 H2O[c0] + 1.000000 CMP[c0] => 1.000000 Phosphate[c0] + 1.000000 Cytidine[c0]	1.000000 M_cpd00001_c0 + 1.000000 M_cpd00046_c0 => 1.000000 M_cpd00009_c0 + 1.000000 M_cpd00367_c0		0	27.9953	0	16.6509	0	17.7709	0	263.613	0	240.308	0	20.9393
R_rxn00364_c0	ATP:CMP phosphotransferase	1.000000 H+[c0] + 1.000000 ATP[c0] + 1.000000 CMP[c0] <=> 1.000000 ADP[c0] + 1.000000 CDP[c0]	1.000000 M_cpd00067_c0 + 1.000000 M_cpd00002_c0 + 1.000000 M_cpd00046_c0 <=> 1.000000 M_cpd00008_c0 + 1.000000 M_cpd00096_c0		0.161179	0.161179	0.161179	0.161179	0.161179	0.161179	0.161179	0.161179	0.161179	1.06476	0.0215187	0.0215187
R_rxn00371_c0	Formate:NAD+ oxidoreductase	1.000000 NAD[c0] + 1.000000 Formate[c0] <=> 1.000000 NADH[c0] + 1.000000 CO2[c0]	1.000000 M_cpd00003_c0 + 1.000000 M_cpd00047_c0 <=> 1.000000 M_cpd00004_c0 + 1.000000 M_cpd00011_c0		-4.53247	-0.0522044	-4.53247	-0.0522044	-4.53247	-0.0522044	-4.53247	-0.0522044	-9.01274	8.90833	-0.60512	-0.00696968
R_rxn00376_c0	N-Formyl-L-aspartate amidohydrolase	1.000000 H2O[c0] + 1.000000 N-Formyl-L-aspartate[c0] <=> 1.000000 L-Aspartate[c0] + 1.000000 Formate[c0]	1.000000 M_cpd00001_c0 + 1.000000 M_cpd00769_c0 <=> 1.000000 M_cpd00041_c0 + 1.000000 M_cpd00047_c0		0	0	0	0	0	0	0	0	0	0	0	0
R_rxn00379_c0	ATP:sulfate adenylyltransferase	1.000000 ATP[c0] + 1.000000 Sulfate[c0] <=> 1.000000 PPi[c0] + 1.000000 APS[c0]	1.000000 M_cpd00002_c0 + 1.000000 M_cpd00048_c0 <=> 1.000000 M_cpd00012_c0 + 1.000000 M_cpd00193_c0		0.050632	0.050632	0.050632	0.050632	0.050632	0.050632	0.050632	0.050632	0.050632	0.050632	0.00675976	0.00675976
R_rxn00390_c0	N-Acyl-L-aspartate amidohydrolase	1.000000 H2O[c0] + 1.000000 N-Acyl-L-aspartate[c0] <=> 1.000000 L-Aspartate[c0] + 1.000000 Carboxylic acid[c0]	1.000000 M_cpd00001_c0 + 1.000000 M_cpd01759_c0 <=> 1.000000 M_cpd00041_c0 + 1.000000 M_cpd00049_c0		0	0	0	0	0	0	0	0	0	0	0	0
R_rxn00392_c0	ATP:riboflavin 5'-phosphotransferase	1.000000 ATP[c0] + 1.000000 Riboflavin[c0] <=> 1.000000 H+[c0] + 1.000000 ADP[c0] + 1.000000 FMN[c0]	1.000000 M_cpd00002_c0 + 1.000000 M_cpd00220_c0 <=> 1.000000 M_cpd00067_c0 + 1.000000 M_cpd00008_c0 + 1.000000 M_cpd00050_c0		6.13535e-05	6.13533e-05	6.13535e-05	6.13533e-05	6.13535e-05	6.13533e-05	6.13535e-05	6.13533e-05	6.13535e-05	6.13533e-05	8.1912e-06	8.1909e-06
R_rxn00394_c0	L-Arginine amidinohydrolase	1.000000 H2O[c0] + 1.000000 L-Arginine[c0] => 1.000000 Ornithine[c0] + 1.000000 Urea[c0]	1.000000 M_cpd00001_c0 + 1.000000 M_cpd00051_c0 => 1.000000 M_cpd00064_c0 + 1.000000 M_cpd00073_c0		0	7.17463	0	2.69436	0	2.69436	0	2.69436	0	7.17463	0	0.359719
R_rxn00397_c0	NAD+:L-arginine ADP-D-ribosyltransferase	1 NAD[c0] + 1 L-Arginine[c0] => 1 H+[c0] + 1 Nicotinamide[c0] + 1 N(omega)-(ADP-D-ribosyl)-L-arginine[c0]	1 M_cpd00003_c0 + 1 M_cpd00051_c0 => 1 M_cpd00067_c0 + 1 M_cpd00133_c0 + 1 M_cpd00884_c0		0	0	0	0	0	0	0	0	0	0	0	0
R_rxn00401_c0	L-Arginine:oxygen 2-oxidoreductase (decarboxylating)	1 O2[c0] + 1 L-Arginine[c0] => 1 H2O[c0] + 1 CO2[c0] + 1 4-Guanidinobutanamide[c0]	1 M_cpd00007_c0 + 1 M_cpd00051_c0 => 1 M_cpd00001_c0 + 1 M_cpd00011_c0 + 1 M_cpd01973_c0		0	0	0	0	0	0	0	0	0	0	0	0
R_rxn00404_c0	L-Arginine:glycine amidinotransferase	1.000000 Glycine[c0] + 1.000000 L-Arginine[c0] <=> 1.000000 Ornithine[c0] + 1.000000 Glycocyamine[c0]	1.000000 M_cpd00033_c0 + 1.000000 M_cpd00051_c0 <=> 1.000000 M_cpd00064_c0 + 1.000000 M_cpd00451_c0		0	0	0	0	0	0	0	0	0	0	0	0
R_rxn00405_c0	L-arginine carboxy-lyase (agmatine-forming)	1.000000 H+[c0] + 1.000000 L-Arginine[c0] => 1.000000 CO2[c0] + 1.000000 Agmatine[c0]	1.000000 M_cpd00067_c0 + 1.000000 M_cpd00051_c0 => 1.000000 M_cpd00011_c0 + 1.000000 M_cpd00152_c0		0	0	0	0	0	0	0	0	0	0	0	0
R_rxn00409_c0	ATP:CDP phosphotransferase	1.000000 ATP[c0] + 1.000000 CDP[c0] <=> 1.000000 ADP[c0] + 1.000000 CTP[c0]	1.000000 M_cpd00002_c0 + 1.000000 M_cpd00096_c0 <=> 1.000000 M_cpd00008_c0 + 1.000000 M_cpd00052_c0		0.161179	0.161179	0.161179	0.161179	0.161179	0.161179	0.161179	0.161179	0.161179	1.06476	0.0215187	0.0215187
R_rxn00410_c0	UTP:ammonia ligase (ADP-forming)	1.000000 ATP[c0] + 1.000000 NH3[c0] + 1.000000 UTP[c0] <=> 2.000000 H+[c0] + 1.000000 ADP[c0] + 1.000000 Phosphate[c0] + 1.000000 CTP[c0]	1.000000 M_cpd00002_c0 + 1.000000 M_cpd00013_c0 + 1.000000 M_cpd00062_c0 <=> 2.000000 M_cpd00067_c0 + 1.000000 M_cpd00008_c0 + 1.000000 M_cpd00009_c0 + 1.000000 M_cpd00052_c0		0.0136651	0.0189538	0.0136651	0.0189538	0.0136651	0.0189538	0.0136651	0.0189538	0.0136651	0.0189538	0.0018244	0.00253048
R_rxn00414_c0	hydrogen-carbonate:L-glutamine amido-ligase (ADP-forming, carbamate-phosphorylating)	2.000000 ATP[c0] + 1.000000 H2O[c0] + 1.000000 H2CO3[c0] + 1.000000 L-Glutamine[c0] => 2.000000 H+[c0] + 2.000000 ADP[c0] + 1.000000 Phosphate[c0] + 1.000000 L-Glutamate[c0] + 1.000000 Carbamoylphosphate[c0]	2.000000 M_cpd00002_c0 + 1.000000 M_cpd00001_c0 + 1.000000 M_cpd00242_c0 + 1.000000 M_cpd00053_c0 => 2.000000 M_cpd00067_c0 + 2.000000 M_cpd00008_c0 + 1.000000 M_cpd00009_c0 + 1.000000 M_cpd00023_c0 + 1.000000 M_cpd00146_c0		0	27.9953	0	16.6509	0	17.7709	0	263.613	0	240.308	0	20.9393
R_rxn00416_c0	L-aspartate:L-glutamine amido-ligase (AMP-forming)	1.0 ATP[c0] + 1.0 L-Aspartate[c0] + 1.0 L-Glutamine[c0] + 1.0 H2O[c0] => 1.0 AMP[c0] + 1.0 PPi[c0] + 1.0 L-Asparagine[c0] + 1.0 L-Glutamate[c0] + 2.0 H+[c0]	1.0 M_cpd00002_c0 + 1.0 M_cpd00041_c0 + 1.0 M_cpd00053_c0 + 1.0 M_cpd00001_c0 => 1.0 M_cpd00018_c0 + 1.0 M_cpd00012_c0 + 1.0 M_cpd00132_c0 + 1.0 M_cpd00023_c0 + 2.0 M_cpd00067_c0		0	9.35388	0	5.57242	0	5.94577	0	87.893	0	82.869	0	6.98271
R_rxn00420_c0	O-phospho-L-serine phosphohydrolase	1.000000 H2O[c0] + 1.000000 phosphoserine[c0] => 1.000000 Phosphate[c0] + 1.000000 L-Serine[c0]	1.000000 M_cpd00001_c0 + 1.000000 M_cpd00738_c0 => 1.000000 M_cpd00009_c0 + 1.000000 M_cpd00054_c0		0	15.3259	2.65643	10.9819	2.65643	11.5419	2.65643	135.136	0	122.656	0.354655	10.8243
R_rxn00423_c0	acetyl-CoA:L-serine O-acetyltransferase	1.000000 Acetyl-CoA[c0] + 1.000000 L-Serine[c0] => 1.000000 CoA[c0] + 1.000000 O-Acetyl-L-serine[c0]	1.000000 M_cpd00022_c0 + 1.000000 M_cpd00054_c0 => 1.000000 M_cpd00010_c0 + 1.000000 M_cpd00722_c0		5.68709	21.4453	6.53575	14.8612	6.53575	15.4212	6.53575	138.342	2.05549	126.778	0.872574	11.3422
R_rxn00424_c0	L-Serine:glyoxylate aminotransferase	1.0 L-Serine[c0] + 1.0 Glyoxalate[c0] <=> 1.0 Hydroxypyruvate[c0] + 1.0 Glycine[c0]	1.0 M_cpd00054_c0 + 1.0 M_cpd00040_c0 <=> 1.0 M_cpd00145_c0 + 1.0 M_cpd00033_c0		2.09281	6.57307	6.57307	6.57307	6.57307	6.57307	6.57307	11.9762	2.09281	16.4565	0.877557	0.877557
R_rxn00428_c0	dichloromethane chloride-lyase (adding H2O; chloride-hydrolysing; formaldehyde-forming)	1.000000 H2O[c0] + 1.000000 Dichloromethane[c0] <=> 2.000000 H+[c0] + 1.000000 Formaldehyde[c0] + 2.000000 Cl-[c0]	1.000000 M_cpd00001_c0 + 1.000000 M_cpd01530_c0 <=> 2.000000 M_cpd00067_c0 + 1.000000 M_cpd00055_c0 + 2.000000 M_cpd00099_c0		0	0	0	0	0	0	0	0	0	0	0	0
R_rxn00438_c0	ATP:thiamin-phosphate phosphotransferase	1.000000 H+[c0] + 1.000000 ATP[c0] + 1.000000 Thiamine phosphate[c0] <=> 1.000000 ADP[c0] + 1.000000 TPP[c0]	1.000000 M_cpd00067_c0 + 1.000000 M_cpd00002_c0 + 1.000000 M_cpd00793_c0 <=> 1.000000 M_cpd00008_c0 + 1.000000 M_cpd00056_c0		0	0	0	0	0	0	0	0	0	0	0	0
R_rxn00440_c0	ATP:thiamine diphosphotransferase	1.000000 ATP[c0] + 1.000000 Thiamin[c0] => 1.000000 H+[c0] + 1.000000 AMP[c0] + 1.000000 TPP[c0]	1.000000 M_cpd00002_c0 + 1.000000 M_cpd00305_c0 => 1.000000 M_cpd00067_c0 + 1.000000 M_cpd00018_c0 + 1.000000 M_cpd00056_c0		0.0009	0.0009	0.0009	0.0009	0.0009	0.0009	0.0009	0.0009	0.0009	0.0009	0.000120157	0.000120157
R_rxn00441_c0	R00621	1.000000 H+[c0] + 1.000000 TPP[c0] + 1.000000 2-Oxoglutarate[c0] => 1.000000 CO2[c0] + 1.000000 3-Carboxy-1-hydroxypropyl-ThPP[c0]	1.000000 M_cpd00067_c0 + 1.000000 M_cpd00056_c0 + 1.000000 M_cpd00024_c0 => 1.000000 M_cpd00011_c0 + 1.000000 M_cpd03189_c0		0	-4.55e-08	0	-1.76e-08	0	-1.76e-08	0	-1.76e-08	0	4.48027	0	5.9e-09
R_rxn00459_c0	2-phospho-D-glycerate hydro-lyase (phosphoenolpyruvate-forming)	1.000000 2-Phospho-D-glycerate[c0] <=> 1.000000 H2O[c0] + 1.000000 Phosphoenolpyruvate[c0]	1.000000 M_cpd00482_c0 <=> 1.000000 M_cpd00001_c0 + 1.000000 M_cpd00061_c0		-11.6144	4.1438	-5.0303	3.29514	-5.59034	3.29514	-128.511	3.29514	-120.417	7.7754	-10.0297	0.439927
R_rxn00461_c0	Phosphoenolpyruvate:UDP-N-acetyl-D-glucosamine 1-carboxyvinyl-transferase	1.000000 UDP-N-acetylglucosamine[c0] + 1.000000 Phosphoenolpyruvate[c0] <=> 1.000000 Phosphate[c0] + 1.000000 UDP-N-acetylglucosamine enolpyruvate[c0]	1.000000 M_cpd00037_c0 + 1.000000 M_cpd00061_c0 <=> 1.000000 M_cpd00009_c0 + 1.000000 M_cpd02820_c0		0.0147807	0.0147807	0.0147807	0.0147807	0.0147807	0.0147807	0.0147807	0.0147807	0.0147807	0.0147807	0.00197333	0.00197333
R_rxn00470_c0	L-ornithine carboxy-lyase (putrescine-forming)	1.000000 H+[c0] + 1.000000 Ornithine[c0] => 1.000000 CO2[c0] + 1.000000 Putrescine[c0]	1.000000 M_cpd00067_c0 + 1.000000 M_cpd00064_c0 => 1.000000 M_cpd00011_c0 + 1.000000 M_cpd00118_c0		0.0018	0.0018	0.0018	0.0018	0.0018	0.0018	0.0018	0.0018	0.0018	0.0018	0.000240314	0.000240314
R_rxn00471_c0	L-ornithine ammonia-lyase (cyclizing; L-proline-forming)	1.000000 Ornithine[c0] => 1.000000 NH3[c0] + 1.000000 L-Proline[c0]	1.000000 M_cpd00064_c0 => 1.000000 M_cpd00013_c0 + 1.000000 M_cpd00129_c0		0	7.17463	0	2.69436	0	2.69436	0	2.69436	0	7.17463	0	0.359719
R_rxn00474_c0	L-serine hydro-lyase (adding indole; L-tryptophan-forming)	1.000000 L-Serine[c0] + 1.000000 indol[c0] => 1.000000 H2O[c0] + 1.000000 L-Tryptophan[c0]	1.000000 M_cpd00054_c0 + 1.000000 M_cpd00359_c0 => 1.000000 M_cpd00001_c0 + 1.000000 M_cpd00065_c0		0	0.0200794	0	0.0200794	0	0.0200794	0	0.0200794	0	0.0200794	0	0.00268075
R_rxn00493_c0	L-Phenylalanine:2-oxoglutarate aminotransferase	1.000000 2-Oxoglutarate[c0] + 1.000000 L-Phenylalanine[c0] <=> 1.000000 L-Glutamate[c0] + 1.000000 Phenylpyruvate[c0]	1.000000 M_cpd00024_c0 + 1.000000 M_cpd00066_c0 <=> 1.000000 M_cpd00023_c0 + 1.000000 M_cpd00143_c0		-0.058537	-0.058537	-0.058537	-0.058537	-0.058537	-0.058537	-0.058537	-0.058537	-0.058537	-0.058537	-0.00781513	-0.00781515
R_rxn00495_c0	L-phenylalanine ammonia-lyase (trans-cinnamate-forming)	1 L-Phenylalanine[c0] => 1 NH3[c0] + 1 (E)-Cinnamate[c0]	1 M_cpd00066_c0 => 1 M_cpd00013_c0 + 1 M_cpd00333_c0		0	0	0	0	0	0	0	0	0	0	0	0
R_rxn00499_c0	(S)-Lactate:NAD+ oxidoreductase	1.000000 NAD[c0] + 1.000000 L-Lactate[c0] <=> 1.000000 H+[c0] + 1.000000 Pyruvate[c0] + 1.000000 NADH[c0]	1.000000 M_cpd00003_c0 + 1.000000 M_cpd00159_c0 <=> 1.000000 M_cpd00067_c0 + 1.000000 M_cpd00020_c0 + 1.000000 M_cpd00004_c0		-31.9946	0	-19.0296	0	-20.3097	0	-301.271	0	-274.638	0	-23.9306	0
R_rxn00500_c0	(R)-Lactate:NAD+ oxidoreductase	1 NAD[c0] + 1 D-Lactate[c0] <=> 1 NADH[c0] + 1 Pyruvate[c0] + 1 H+[c0]	1 M_cpd00003_c0 + 1 M_cpd00221_c0 <=> 1 M_cpd00004_c0 + 1 M_cpd00020_c0 + 1 M_cpd00067_c0		0	0	0	0	0	0	0	0	0	0	0	0
R_rxn00503_c0	(S)-1-pyrroline-5-carboxylate:NAD+ oxidoreductase	2.000000 H2O[c0] + 1.000000 NAD[c0] + 1.000000 1-Pyrroline-5-carboxylate[c0] <=> 1.000000 H+[c0] + 1.000000 L-Glutamate[c0] + 1.000000 NADH[c0]	2.000000 M_cpd00001_c0 + 1.000000 M_cpd00003_c0 + 1.000000 M_cpd02431_c0 <=> 1.000000 M_cpd00067_c0 + 1.000000 M_cpd00023_c0 + 1.000000 M_cpd00004_c0		-0.0543817	7.12025	-0.0543817	2.63998	-0.0543817	2.63998	-0.0543817	2.63998	-0.0543817	7.12025	-0.00726036	0.352458
R_rxn00505_c0	Isocitrate:NAD+ oxidoreductase (decarboxylating)	1.000000 NAD[c0] + 1.000000 Isocitrate[c0] => 1.000000 NADH[c0] + 1.000000 CO2[c0] + 1.000000 2-Oxoglutarate[c0]	1.000000 M_cpd00003_c0 + 1.000000 M_cpd00260_c0 => 1.000000 M_cpd00004_c0 + 1.000000 M_cpd00011_c0 + 1.000000 M_cpd00024_c0		0.308261	0.308261	0.308261	0.308261	0.308261	0.308261	0.293861	0.308261	0.293861	4.78853	0.0411553	0.0411553
R_rxn00506_c0	Acetaldehyde:NAD+ oxidoreductase	1.000000 H2O[c0] + 1.000000 NAD[c0] + 1.000000 Acetaldehyde[c0] => 2.000000 H+[c0] + 1.000000 NADH[c0] + 1.000000 Acetate[c0]	1.000000 M_cpd00001_c0 + 1.000000 M_cpd00003_c0 + 1.000000 M_cpd00071_c0 => 2.000000 M_cpd00067_c0 + 1.000000 M_cpd00004_c0 + 1.000000 M_cpd00029_c0		0	0	0	0	0	0	0	0	0	0	0	0
R_rxn00515_c0	ATP:IDP phosphotransferase	1.000000 ATP[c0] + 1.000000 IDP[c0] <=> 1.000000 ADP[c0] + 1.000000 ITP[c0]	1.000000 M_cpd00002_c0 + 1.000000 M_cpd00090_c0 <=> 1.000000 M_cpd00008_c0 + 1.000000 M_cpd00068_c0		0	27.9953	0	16.6509	0	17.7709	0	263.613	0	240.308	0	20.9393
R_rxn00527_c0	L-tyrosine:2-oxoglutarate aminotransferase	1.000000 2-Oxoglutarate[c0] + 1.000000 L-Tyrosine[c0] <=> 1.000000 L-Glutamate[c0] + 1.000000 p-hydroxyphenylpyruvate[c0]	1.000000 M_cpd00024_c0 + 1.000000 M_cpd00069_c0 <=> 1.000000 M_cpd00023_c0 + 1.000000 M_cpd00868_c0		-0.0390432	-0.0390433	-0.0390432	-0.0390433	-0.0390432	-0.0390433	-0.0390432	-0.0390433	-0.0390432	-0.0390433	-0.00521257	-0.00521258
R_rxn00529_c0	L-tyrosine carboxy-lyase (tyramine-forming)	1.0 L-Tyrosine[c0] + 1.0 H+[c0] => 1.0 Tyramine[c0] + 1.0 CO2[c0]	1.0 M_cpd00069_c0 + 1.0 M_cpd00067_c0 => 1.0 M_cpd00374_c0 + 1.0 M_cpd00011_c0		0	0	0	0	0	0	0	0	0	0	0	0
R_rxn00532_c0	3-oxopropanoate:NADP+ oxidoreductase (CoA-malonylating)	1.000000 CoA[c0] + 1.000000 NADP[c0] + 1.000000 3-Oxopropanoate[c0] <=> 1.000000 H+[c0] + 1.000000 Malonyl-CoA[c0] + 1.000000 NADPH[c0]	1.000000 M_cpd00010_c0 + 1.000000 M_cpd00006_c0 + 1.000000 M_cpd00191_c0 <=> 1.000000 M_cpd00067_c0 + 1.000000 M_cpd00070_c0 + 1.000000 M_cpd00005_c0		0	0	0	0	0	0	0	0	0	0	0	0
R_rxn00539_c0	ethanolamine ammonia-lyase (acetaldehyde-forming)	1.000000 Aminoethanol[c0] => 1.000000 NH3[c0] + 1.000000 Acetaldehyde[c0]	1.000000 M_cpd00162_c0 => 1.000000 M_cpd00013_c0 + 1.000000 M_cpd00071_c0		0	0	0	0	0	0	0	0	0	0	0	0
R_rxn00543_c0	ethanol:NAD+ oxidoreductase	1.000000 NAD[c0] + 1.000000 Ethanol[c0] <=> 1.000000 H+[c0] + 1.000000 NADH[c0] + 1.000000 Acetaldehyde[c0]	1.000000 M_cpd00003_c0 + 1.000000 M_cpd00363_c0 <=> 1.000000 M_cpd00067_c0 + 1.000000 M_cpd00004_c0 + 1.000000 M_cpd00071_c0		0	0	0	0	0	0	0	0	0	0	0	0
R_rxn00547_c0	ATP:D-fructose 6-phosphotransferase	1.000000 ATP[c0] + 1.000000 D-Fructose[c0] <=> 1.000000 H+[c0] + 1.000000 ADP[c0] + 1.000000 D-fructose-6-phosphate[c0]	1.000000 M_cpd00002_c0 + 1.000000 M_cpd00082_c0 <=> 1.000000 M_cpd00067_c0 + 1.000000 M_cpd00008_c0 + 1.000000 M_cpd00072_c0		0	0	0	0	0	0	0	0	0	0	0	0
R_rxn00548_c0	D-fructose-6-phosphate D-erythrose-4-phosphate-lyase (adding phosphate; acetyl-phosphate-forming)	1.000000 Phosphate[c0] + 1.000000 D-fructose-6-phosphate[c0] => 1.000000 H2O[c0] + 1.000000 D-Erythrose4-phosphate[c0] + 1.000000 Acetylphosphate[c0]	1.000000 M_cpd00009_c0 + 1.000000 M_cpd00072_c0 => 1.000000 M_cpd00001_c0 + 1.000000 M_cpd00236_c0 + 1.000000 M_cpd00196_c0		0	-1.7e-08	0	-1.7e-08	0	-1.7e-08	0	-5.28e-08	0	9.91101	0	5.9e-09
R_rxn00549_c0	D-Fructose-1,6-bisphosphate 1-phosphohydrolase	1.000000 H2O[c0] + 1.000000 D-fructose-1,6-bisphosphate[c0] => 1.000000 Phosphate[c0] + 1.000000 D-fructose-6-phosphate[c0]	1.000000 M_cpd00001_c0 + 1.000000 M_cpd00290_c0 => 1.000000 M_cpd00009_c0 + 1.000000 M_cpd00072_c0		0.767573	14.7652	0.767573	9.09301	0.767573	9.65305	0.753173	132.574	0	120.154	0.102477	10.5721
R_rxn00550_c0	beta-D-fructose-2,6-bisphosphate 2-phosphohydrolase	1.000000 H2O[c0] + 1.000000 D-Fructose 2,6-bisphosphate[c0] <=> 2.000000 H+[c0] + 1.000000 Phosphate[c0] + 1.000000 D-fructose-6-phosphate[c0]	1.000000 M_cpd00001_c0 + 1.000000 M_cpd00503_c0 <=> 2.000000 M_cpd00067_c0 + 1.000000 M_cpd00009_c0 + 1.000000 M_cpd00072_c0		0	0	0	0	0	0	0	0	0	0	0	0
R_rxn00551_c0	diphosphate:D-fructose-6-phosphate 1-phosphotransferase	1.000000 PPi[c0] + 1.000000 D-fructose-6-phosphate[c0] <=> 1.000000 H+[c0] + 1.000000 Phosphate[c0] + 1.000000 D-fructose-1,6-bisphosphate[c0]	1.000000 M_cpd00012_c0 + 1.000000 M_cpd00072_c0 <=> 1.000000 M_cpd00067_c0 + 1.000000 M_cpd00009_c0 + 1.000000 M_cpd00290_c0		0.593679	14.5913	0.593679	8.91912	0.593679	9.47915	0.579279	132.4	0.579279	124.864	0.0792608	10.5489
R_rxn00555_c0	L-glutamine:D-fructose-6-phosphate isomerase (deaminating)	1.000000 D-fructose-6-phosphate[c0] + 1.000000 L-Glutamine[c0] <=> 1.000000 L-Glutamate[c0] + 1.000000 D-Glucosamine phosphate[c0]	1.000000 M_cpd00072_c0 + 1.000000 M_cpd00053_c0 <=> 1.000000 M_cpd00023_c0 + 1.000000 M_cpd00288_c0		0.0422504	0.0422504	0.0422504	0.0422504	0.0422504	0.0422504	0.0422504	0.0422504	0.0422504	0.0422504	0.00564076	0.00564075
R_rxn00558_c0	D-glucose-6-phosphate aldose-ketose-isomerase	1.000000 D-glucose-6-phosphate[c0] <=> 1.000000 D-fructose-6-phosphate[c0]	1.000000 M_cpd00079_c0 <=> 1.000000 M_cpd00072_c0		-14.0127	-0.0150874	-8.34053	-0.0150874	-8.90056	-0.0150874	-131.821	-0.0150874	-124.285	-0.0150874	-10.4716	-0.00201429
R_rxn00559_c0	D-mannose-6-phosphate aldose-ketose-isomerase	1.000000 D-mannose-6-phosphate[c0] <=> 1.000000 D-fructose-6-phosphate[c0]	1.000000 M_cpd00235_c0 <=> 1.000000 M_cpd00072_c0		0	0	0	0	0	0	0	0	0	0	0	0
R_rxn00562_c0	(S)-ureidoglycolate urea-lyase (glyoxylate-forming)	1 Ureidoglycolate[c0] <=> 1 Glyoxalate[c0] + 1 Urea[c0]	1 M_cpd00465_c0 <=> 1 M_cpd00040_c0 + 1 M_cpd00073_c0		0	0	0	0	0	0	0	0	0	0	0	0
R_rxn00568_c0	NIRBD-RXN.c	5.000000 H+[c0] + 3.000000 NADH[c0] + 1.000000 Nitrite[c0] => 2.000000 H2O[c0] + 3.000000 NAD[c0] + 1.000000 NH3[c0]	5.000000 M_cpd00067_c0 + 3.000000 M_cpd00004_c0 + 1.000000 M_cpd00075_c0 => 2.000000 M_cpd00001_c0 + 3.000000 M_cpd00003_c0 + 1.000000 M_cpd00013_c0		0	0	0	0	0	0	0	0	0	0	0	0
R_rxn00569_c0	Nitrite reductase (NAD(P)H)	5.000000 H+[c0] + 1.000000 Nitrite[c0] + 3.000000 NADPH[c0] => 2.000000 H2O[c0] + 1.000000 NH3[c0] + 3.000000 NADP[c0]	5.000000 M_cpd00067_c0 + 1.000000 M_cpd00075_c0 + 3.000000 M_cpd00005_c0 => 2.000000 M_cpd00001_c0 + 1.000000 M_cpd00013_c0 + 3.000000 M_cpd00006_c0		0	0	0	0	0	0	0	0	0	0	0	0
R_rxn00599_c0	succinyl-CoA:glycine C-succinyltransferase (decarboxylating)	1.000000 H+[c0] + 1.000000 Glycine[c0] + 1.000000 Succinyl-CoA[c0] => 1.000000 CoA[c0] + 1.000000 CO2[c0] + 1.000000 5-Aminolevulinate[c0]	1.000000 M_cpd00067_c0 + 1.000000 M_cpd00033_c0 + 1.000000 M_cpd00078_c0 => 1.000000 M_cpd00010_c0 + 1.000000 M_cpd00011_c0 + 1.000000 M_cpd00338_c0		0	-4.55e-08	0	-4.55e-08	0	-4.55e-08	0	0.0144	0	0.0144	0	1.58e-08
R_rxn00604_c0	D-glucose-6-phosphate:NADP+ 1-oxidoreductase	1.000000 NADP[c0] + 1.000000 D-glucose-6-phosphate[c0] <=> 1.000000 H+[c0] + 1.000000 NADPH[c0] + 1.000000 6-phospho-D-glucono-1-5-lactone[c0]	1.000000 M_cpd00006_c0 + 1.000000 M_cpd00079_c0 <=> 1.000000 M_cpd00067_c0 + 1.000000 M_cpd00005_c0 + 1.000000 M_cpd00911_c0		0	13.9976	0	8.32544	0	8.88547	0	131.806	0	124.27	0	10.4696
R_rxn00611_c0	sn-Glycerol-3-phosphate:NAD+ 2-oxidoreductase	1.000000 NAD[c0] + 1.000000 Glycerol-3-phosphate[c0] <=> 1.000000 H+[c0] + 1.000000 NADH[c0] + 1.000000 Glycerone-phosphate[c0]	1.000000 M_cpd00003_c0 + 1.000000 M_cpd00080_c0 <=> 1.000000 M_cpd00067_c0 + 1.000000 M_cpd00004_c0 + 1.000000 M_cpd00095_c0		-32.1323	-0.0861673	-19.1673	-0.0861673	-20.4474	-0.0861673	-301.409	-0.0861673	-274.776	-0.0861673	-23.949	-0.011504
R_rxn00616_c0	sn-Glycerol-3-phosphate:(acceptor) 2-oxidoreductase	1.000000 H+[c0] + 1.000000 Glycerol-3-phosphate[c0] + 1.000000 FAD[c0] <=> 1.000000 FADH2[c0] + 1.000000 Glycerone-phosphate[c0]	1.000000 M_cpd00067_c0 + 1.000000 M_cpd00080_c0 + 1.000000 M_cpd00015_c0 <=> 1.000000 M_cpd00982_c0 + 1.000000 M_cpd00095_c0		0	32.0461	0	19.0811	0	20.3612	0	301.323	0	274.69	0	23.9375
R_rxn00623_c0	hydrogen-sulfide:NADP+ oxidoreductase	3.000000 H2O[c0] + 3.000000 NADP[c0] + 1.000000 H2S[c0] <=> 3.000000 H+[c0] + 3.000000 NADPH[c0] + 1.000000 Sulfite[c0]	3.000000 M_cpd00001_c0 + 3.000000 M_cpd00006_c0 + 1.000000 M_cpd00239_c0 <=> 3.000000 M_cpd00067_c0 + 3.000000 M_cpd00005_c0 + 1.000000 M_cpd00081_c0		-0.050632	-0.050632	-0.050632	-0.050632	-0.050632	-0.050632	-0.050632	-0.050632	-0.050632	-0.050632	-0.00675976	-0.00675976
R_rxn00641_c0	GTP:alpha-D-mannose-1-phosphate guanylyltransferase	1.000000 GTP[c0] + 1.000000 D-Mannose1-phosphate[c0] <=> 1.000000 PPi[c0] + 1.000000 GDP-mannose[c0]	1.000000 M_cpd00038_c0 + 1.000000 M_cpd00485_c0 <=> 1.000000 M_cpd00012_c0 + 1.000000 M_cpd00083_c0		0	0	0	0	0	0	0	0	0	0	0	0
R_rxn00642_c0	GDP-mannose 4,6-hydro-lyase (GDP-4-dehydro-6-deoxy-D-mannose-forming)	1.000000 GDP-mannose[c0] => 1.000000 H2O[c0] + 1.000000 GDP-4-dehydro-D-rhamnose[c0]	1.000000 M_cpd00083_c0 => 1.000000 M_cpd00001_c0 + 1.000000 M_cpd00900_c0		0	0	0	0	0	0	0	0	0	0	0	0
R_rxn00643_c0	GDP-mannose 3,5-epimerase	1 GDP-mannose[c0] <=> 1 GDP-L-galactose[c0]	1 M_cpd00083_c0 <=> 1 M_cpd01536_c0		0	0	0	0	0	0	0	0	0	0	0	0
R_rxn00646_c0	L-glutamate:L-cysteine gamma-ligase (ADP-forming)	1.000000 ATP[c0] + 1.000000 L-Glutamate[c0] + 1.000000 L-Cysteine[c0] => 1.000000 H+[c0] + 1.000000 gamma-Glutamylcysteine[c0] + 1.000000 ADP[c0] + 1.000000 Phosphate[c0]	1.000000 M_cpd00002_c0 + 1.000000 M_cpd00023_c0 + 1.000000 M_cpd00084_c0 => 1.000000 M_cpd00067_c0 + 1.000000 M_cpd00506_c0 + 1.000000 M_cpd00008_c0 + 1.000000 M_cpd00009_c0		0	13.9976	0	8.32544	0	8.88547	0	131.806	0	120.154	0	10.4696
R_rxn00647_c0	L-Cysteine:2-oxoglutarate aminotransferase	1.0 2-Oxoglutarate[c0] + 1.0 L-Cysteine[c0] <=> 1.0 L-Glutamate[c0] + 1.0 Mercaptopyruvate[c0]	1.0 M_cpd00024_c0 + 1.0 M_cpd00084_c0 <=> 1.0 M_cpd00023_c0 + 1.0 M_cpd00706_c0		5.67266	21.4309	6.52133	14.8468	6.52133	15.4068	6.52133	138.328	2.04106	126.763	0.870648	11.3403
R_rxn00649_c0	O3-acetyl-L-serine:hydrogen-sulfide 2-amino-2-carboxyethyltransferase	1.000000 O-Acetyl-L-serine[c0] + 1.000000 H2S[c0] => 1.000000 L-Cysteine[c0] + 1.000000 Acetate[c0]	1.000000 M_cpd00722_c0 + 1.000000 M_cpd00239_c0 => 1.000000 M_cpd00084_c0 + 1.000000 M_cpd00029_c0		0	21.4453	0	14.8612	0	15.4212	0	138.342	0	126.778	0	11.3422
R_rxn00650_c0	L-cysteinylglycine dipeptidase	1.000000 H2O[c0] + 1.000000 Cys-Gly[c0] <=> 1.000000 Glycine[c0] + 1.000000 L-Cysteine[c0]	1.000000 M_cpd00001_c0 + 1.000000 M_cpd01017_c0 <=> 1.000000 M_cpd00033_c0 + 1.000000 M_cpd00084_c0		-0.0009	13.9967	-0.0009	8.32454	-0.0009	8.88457	-0.0009	131.805	-0.0009	120.153	-0.000120157	10.4695
R_rxn00653_c0	3-aminopropanal:NAD+ oxidoreductase	2.000000 H+[c0] + 1.000000 NADH[c0] + 1.000000 beta-Alanine[c0] <=> 1.000000 H2O[c0] + 1.000000 NAD[c0] + 1.000000 3-Aminopropanal[c0]	2.000000 M_cpd00067_c0 + 1.000000 M_cpd00004_c0 + 1.000000 M_cpd00085_c0 <=> 1.000000 M_cpd00001_c0 + 1.000000 M_cpd00003_c0 + 1.000000 M_cpd01504_c0		0	0	0	0	0	0	0	0	0	0	0	0
R_rxn00655_c0	N-(D-1-carboxyethyl)-beta-alanine:NAD+ oxidoreductase (beta-alanine-forming)	1.000000 H2O[c0] + 1.000000 NAD[c0] + 1.000000 beta-Alanopine[c0] <=> 1.000000 H+[c0] + 1.000000 Pyruvate[c0] + 1.000000 NADH[c0] + 1.000000 beta-Alanine[c0]	1.000000 M_cpd00001_c0 + 1.000000 M_cpd00003_c0 + 1.000000 M_cpd01489_c0 <=> 1.000000 M_cpd00067_c0 + 1.000000 M_cpd00020_c0 + 1.000000 M_cpd00004_c0 + 1.000000 M_cpd00085_c0		0	0	0	0	0	0	0	0	0	0	0	0
R_rxn00663_c0	rxn00663	1 H2O[c0] + 1 beta-Alanyl-CoA[c0] => 1 CoA[c0] + 1 H+[c0] + 1 beta-Alanine[c0]	1 M_cpd00001_c0 + 1 M_cpd01560_c0 => 1 M_cpd00010_c0 + 1 M_cpd00067_c0 + 1 M_cpd00085_c0		0.000838646	0.000838646	0.000838646	0.000838646	0.000838646	0.000838646	0.000838646	0.000838646	0.000838646	0.000838646	0.000111966	0.000111965
R_rxn00678_c0	(S)-2-Methyl-3-oxopropanoyl-CoA:pyruvate carboxyltransferase	1.000000 Pyruvate[c0] + 1.000000 D-methylmalonyl-CoA[c0] <=> 1.000000 Oxaloacetate[c0] + 1.000000 Propionyl-CoA[c0]	1.000000 M_cpd00020_c0 + 1.000000 M_cpd00519_c0 <=> 1.000000 M_cpd00032_c0 + 1.000000 M_cpd00086_c0		0	0	0	0	0	0	0	0	0	0	0	0
R_rxn00682_c0	L-erythro-3-Methylmalyl-CoA glyoxylate-lyase (propanoyl-CoA-forming)	1.000000 H+[c0] + 1.000000 Propionyl-CoA[c0] + 1.000000 Glyoxalate[c0] <=> 1.000000 L-erythro-3-Methylmalyl-CoA[c0]	1.000000 M_cpd00067_c0 + 1.000000 M_cpd00086_c0 + 1.000000 M_cpd00040_c0 <=> 1.000000 M_cpd03588_c0		0	0	0	0	0	0	0	0	0	0	0	0
R_rxn00684_c0	5,6,7,8-tetrahydrofolate:NAD+ oxidoreductase	1.0 Tetrahydrofolate[c0] + 1.0 NAD[c0] <=> 1.0 Folate[c0] + 1.0 NADH[c0] + 1.0 H+[c0]	1.0 M_cpd00087_c0 + 1.0 M_cpd00003_c0 <=> 1.0 M_cpd00393_c0 + 1.0 M_cpd00004_c0 + 1.0 M_cpd00067_c0		-35.1463	-29.1808	-33.6611	-29.1808	-33.6611	-29.1808	-64.651	-24.0159	-61.8198	-16.5621	-4.49402	-3.89587
R_rxn00686_c0	5,6,7,8-tetrahydrofolate:NADP+ oxidoreductase	1.000000 NADP[c0] + 1.000000 Tetrahydrofolate[c0] <=> 1.000000 H+[c0] + 1.000000 NADPH[c0] + 1.000000 Dihydrofolate[c0]	1.000000 M_cpd00006_c0 + 1.000000 M_cpd00087_c0 <=> 1.000000 M_cpd00067_c0 + 1.000000 M_cpd00005_c0 + 1.000000 M_cpd00330_c0		29.1728	35.1383	29.1728	33.6531	29.1728	33.6531	24.0079	64.643	16.5541	61.8118	3.8948	4.49295
R_rxn00689_c0	Tetrahydrofolate:L-glutamate gamma-ligase (ADP-forming)	1.000000 ATP[c0] + 1.000000 L-Glutamate[c0] + 1.000000 Tetrahydrofolate[c0] => 1.000000 H+[c0] + 1.000000 ADP[c0] + 1.000000 Phosphate[c0] + 1.000000 THF-L-glutamate[c0]	1.000000 M_cpd00002_c0 + 1.000000 M_cpd00023_c0 + 1.000000 M_cpd00087_c0 => 1.000000 M_cpd00067_c0 + 1.000000 M_cpd00008_c0 + 1.000000 M_cpd00009_c0 + 1.000000 M_cpd06227_c0		0	0	0	0	0	0	0	0	0	0	0	0
R_rxn00690_c0	Formate:tetrahydrofolate ligase (ADP-forming)	1.000000 ATP[c0] + 1.000000 Formate[c0] + 1.000000 Tetrahydrofolate[c0] <=> 1.000000 ADP[c0] + 1.000000 Phosphate[c0] + 1.000000 10-Formyltetrahydrofolate[c0]	1.000000 M_cpd00002_c0 + 1.000000 M_cpd00047_c0 + 1.000000 M_cpd00087_c0 <=> 1.000000 M_cpd00008_c0 + 1.000000 M_cpd00009_c0 + 1.000000 M_cpd00201_c0		0.043415	0.043415	0.043415	0.043415	0.043415	0.043415	0.043415	0.043415	0.043415	0.043415	0.00579624	0.00579624
R_rxn00692_c0	5,10-Methylenetetrahydrofolate:glycine hydroxymethyltransferase	1.000000 Glycine[c0] + 1.000000 H2O[c0] + 1.000000 5-10-Methylenetetrahydrofolate[c0] <=> 1.000000 L-Serine[c0] + 1.000000 Tetrahydrofolate[c0]	1.000000 M_cpd00033_c0 + 1.000000 M_cpd00001_c0 + 1.000000 M_cpd00125_c0 <=> 1.000000 M_cpd00054_c0 + 1.000000 M_cpd00087_c0		10.5867	10.5867	10.5867	10.5867	10.5867	10.5867	10.5867	13.2811	6.99939	17.7613	1.41341	1.41341
R_rxn00693_c0	5-Methyltetrahydrofolate:L-homocysteine S-methyltransferase	1.000000 5-Methyltetrahydrofolate[c0] + 1.000000 Homocysteine[c0] <=> 1.000000 L-Methionine[c0] + 1.000000 Tetrahydrofolate[c0]	1.000000 M_cpd00345_c0 + 1.000000 M_cpd00135_c0 <=> 1.000000 M_cpd00060_c0 + 1.000000 M_cpd00087_c0		0.0389063	0.0389063	0.0389063	0.0389063	0.0389063	0.0389063	0.0389063	0.0389063	0.0389063	0.37775	0.00519429	0.00519429
R_rxn00695_c0	ATP:alpha-D-glucose-1-phosphate adenylyltransferase	1.000000 ATP[c0] + 1.000000 Glucose-1-phosphate[c0] <=> 1.000000 PPi[c0] + 1.000000 ADPglucose[c0]	1.000000 M_cpd00002_c0 + 1.000000 M_cpd00089_c0 <=> 1.000000 M_cpd00012_c0 + 1.000000 M_cpd00387_c0		0	0	0	0	0	0	0	0	0	0	0	0
R_rxn00700_c0	GTP:alpha-D-glucose-1-phosphate guanylyltransferase	1.000000 GTP[c0] + 1.000000 Glucose-1-phosphate[c0] <=> 1.000000 PPi[c0] + 1.000000 GDP-glucose[c0]	1.000000 M_cpd00038_c0 + 1.000000 M_cpd00089_c0 <=> 1.000000 M_cpd00012_c0 + 1.000000 M_cpd00315_c0		0	0	0	0	0	0	0	0	0	0	0	0
R_rxn00702_c0	CTP:alpha-D-glucose-1-phosphate cytidylyltransferase	1.000000 CTP[c0] + 1.000000 Glucose-1-phosphate[c0] <=> 1.000000 PPi[c0] + 1.000000 CDP-glucose[c0]	1.000000 M_cpd00052_c0 + 1.000000 M_cpd00089_c0 <=> 1.000000 M_cpd00012_c0 + 1.000000 M_cpd00390_c0		0	0	0	0	0	0	0	0	0	0	0	0
R_rxn00703_c0	alpha-D-Glucose-1-phosphate:alpha-D-glucose-1-phosphate 4-alpha-D-glucosyltransferase (dephosphorylating)	1 H2O[c0] + 2 Glucose-1-phosphate[c0] => 2 Phosphate[c0] + 2 H+[c0] + 1 Maltose[c0]	1 M_cpd00001_c0 + 2 M_cpd00089_c0 => 2 M_cpd00009_c0 + 2 M_cpd00067_c0 + 1 M_cpd00179_c0		0	0	0	0	0	0	0	0	0	0	0	0
R_rxn00704_c0	alpha-D-Glucose 1-phosphate 1,6-phosphomutase	1.000000 Glucose-1-phosphate[c0] <=> 1.000000 D-glucose-6-phosphate[c0]	1.000000 M_cpd00089_c0 <=> 1.000000 M_cpd00079_c0		-0.0027888	-0.0027888	-0.0027888	-0.0027888	-0.0027888	-0.0027888	-0.0027888	-0.0027888	-0.0027888	-0.0027888	-0.000372315	-0.000372327
R_rxn00707_c0	ITP:cytidine 5'-phosphotransferase	1.000000 ITP[c0] + 1.000000 Cytidine[c0] <=> 1.000000 H+[c0] + 1.000000 CMP[c0] + 1.000000 IDP[c0]	1.000000 M_cpd00068_c0 + 1.000000 M_cpd00367_c0 <=> 1.000000 M_cpd00067_c0 + 1.000000 M_cpd00046_c0 + 1.000000 M_cpd00090_c0		0	27.9953	0	16.6509	0	17.7709	0	263.613	0	240.308	0	20.9393
R_rxn00708_c0	Uridine 5'-monophosphate phosphohydrolase	1.000000 H2O[c0] + 1.000000 UMP[c0] => 1.000000 Phosphate[c0] + 1.000000 Uridine[c0]	1.000000 M_cpd00001_c0 + 1.000000 M_cpd00091_c0 => 1.000000 M_cpd00009_c0 + 1.000000 M_cpd00249_c0		0	0	0	0	0	0	0	0	0	0	0	0
R_rxn00710_c0	orotidine-5'-phosphate carboxy-lyase (UMP-forming)	1.000000 H+[c0] + 1.000000 Orotidylic acid[c0] => 1.000000 CO2[c0] + 1.000000 UMP[c0]	1.000000 M_cpd00067_c0 + 1.000000 M_cpd00810_c0 => 1.000000 M_cpd00011_c0 + 1.000000 M_cpd00091_c0		0.0328979	0.0328978	0.0328979	0.0328978	0.0328979	0.0328978	0.0328979	0.0328978	0.0328979	0.0328978	0.00439212	0.0043921
R_rxn00711_c0	UMP:diphosphate phospho-alpha-D-ribosyltransferase	1.000000 PRPP[c0] + 1.000000 Uracil[c0] => 1.000000 PPi[c0] + 1.000000 H+[c0] + 1.000000 UMP[c0]	1.000000 M_cpd00103_c0 + 1.000000 M_cpd00092_c0 => 1.000000 M_cpd00012_c0 + 1.000000 M_cpd00067_c0 + 1.000000 M_cpd00091_c0		0	0	0	0	0	0	0	0	0	0	0	0
R_rxn00717_c0	Cytosine aminohydrolase	1.000000 H+[c0] + 1.000000 H2O[c0] + 1.000000 Cytosine[c0] => 1.000000 NH3[c0] + 1.000000 Uracil[c0]	1.000000 M_cpd00067_c0 + 1.000000 M_cpd00001_c0 + 1.000000 M_cpd00307_c0 => 1.000000 M_cpd00013_c0 + 1.000000 M_cpd00092_c0		0	0	0	0	0	0	0	0	0	0	0	0
R_rxn00721_c0	ATP:anthranilate N-adenylyltransferase	1.000000 ATP[c0] + 1.000000 Anthranilate[c0] <=> 1.000000 PPi[c0] + 1.000000 H+[c0] + 1.000000 N-Adenylylanthranilate[c0]	1.000000 M_cpd00002_c0 + 1.000000 M_cpd00093_c0 <=> 1.000000 M_cpd00012_c0 + 1.000000 M_cpd00067_c0 + 1.000000 M_cpd02102_c0		0	0	0	0	0	0	0	0	0	0	0	0
R_rxn00726_c0	chorismate pyruvate-lyase (amino-accepting; anthranilate-forming)	1.000000 NH3[c0] + 1.000000 Chorismate[c0] => 1.000000 H+[c0] + 1.000000 H2O[c0] + 1.000000 Pyruvate[c0] + 1.000000 Anthranilate[c0]	1.000000 M_cpd00013_c0 + 1.000000 M_cpd00216_c0 => 1.000000 M_cpd00067_c0 + 1.000000 M_cpd00001_c0 + 1.000000 M_cpd00020_c0 + 1.000000 M_cpd00093_c0		0	0.0200794	0	0.0200794	0	0.0200794	0	0.0200794	0	0.0200794	0	0.00268075
R_rxn00727_c0	Chorismate pyruvate-lyase (amino-accepting)	1.000000 L-Glutamine[c0] + 1.000000 Chorismate[c0] => 1.000000 H+[c0] + 1.000000 Pyruvate[c0] + 1.000000 L-Glutamate[c0] + 1.000000 Anthranilate[c0]	1.000000 M_cpd00053_c0 + 1.000000 M_cpd00216_c0 => 1.000000 M_cpd00067_c0 + 1.000000 M_cpd00020_c0 + 1.000000 M_cpd00023_c0 + 1.000000 M_cpd00093_c0		0	0.0200794	0	0.0200794	0	0.0200794	0	0.0200794	0	0.0200794	0	0.00268075
R_rxn00730_c0	Malonyl-CoA:anthranilate N-malonyltransferase	1.000000 Malonyl-CoA[c0] + 1.000000 Anthranilate[c0] <=> 1.000000 CoA[c0] + 1.000000 N-Malonylanthranilate[c0]	1.000000 M_cpd00070_c0 + 1.000000 M_cpd00093_c0 <=> 1.000000 M_cpd00010_c0 + 1.000000 M_cpd02014_c0		0	0	0	0	0	0	0	0	0	0	0	0
R_rxn00734_c0	rxn00734	0.5 O2[c0] + 1 Phosphate[c0] + 2 H+[c0] + 1 2-Oxobutyrate[c0] => 1 H2O[c0] + 1 CO2[c0] + 1 Propionyl phosphate[c0]	0.5 M_cpd00007_c0 + 1 M_cpd00009_c0 + 2 M_cpd00067_c0 + 1 M_cpd00094_c0 => 1 M_cpd00001_c0 + 1 M_cpd00011_c0 + 1 M_cpd01844_c0		0	0	0	0	0	0	0	0	0	0	0	0
R_rxn00735_c0	(2R,3S)-3-methylmalate:NAD+ oxidoreductase	1.000000 NADH[c0] + 1.000000 CO2[c0] + 1.000000 2-Oxobutyrate[c0] <=> 1.000000 NAD[c0] + 1.000000 D-erythro-3-Methylmalate[c0]	1.000000 M_cpd00004_c0 + 1.000000 M_cpd00011_c0 + 1.000000 M_cpd00094_c0 <=> 1.000000 M_cpd00003_c0 + 1.000000 M_cpd03593_c0		-0.0989454	-0.0989454	-0.0989454	-0.0989454	-0.0989454	-0.0989454	-0.0989454	-0.0989454	-0.0989454	-0.0989454	-0.01321	-0.01321
R_rxn00741_c0	2-Hydroxybutyrate:NAD+ oxidoreductase	1.000000 NAD[c0] + 1.000000 2-Hydroxybutyrate[c0] <=> 1.000000 H+[c0] + 1.000000 NADH[c0] + 1.000000 2-Oxobutyrate[c0]	1.000000 M_cpd00003_c0 + 1.000000 M_cpd03561_c0 <=> 1.000000 M_cpd00067_c0 + 1.000000 M_cpd00004_c0 + 1.000000 M_cpd00094_c0		0	0	0	0	0	0	0	0	0	0	0	0
R_rxn00743_c0	Glycerone phosphate phosphohydrolase	1.000000 H2O[c0] + 1.000000 Glycerone-phosphate[c0] => 1.000000 Phosphate[c0] + 1.000000 Glycerone[c0]	1.000000 M_cpd00001_c0 + 1.000000 M_cpd00095_c0 => 1.000000 M_cpd00009_c0 + 1.000000 M_cpd00157_c0		0	27.9953	0	16.6509	0	17.7709	0	263.613	0	240.308	0	20.9393
R_rxn00745_c0	Phosphoenolpyruvate:glycerone phosphotransferase	1.000000 Phosphoenolpyruvate[c0] + 1.000000 Glycerone[c0] <=> 1.000000 Pyruvate[c0] + 1.000000 Glycerone-phosphate[c0]	1.000000 M_cpd00061_c0 + 1.000000 M_cpd00157_c0 <=> 1.000000 M_cpd00020_c0 + 1.000000 M_cpd00095_c0		0	27.9953	0	16.6509	0	17.7709	0	263.613	0	240.308	0	20.9393
R_rxn00747_c0	D-glyceraldehyde-3-phosphate aldose-ketose-isomerase	1.000000 Glyceraldehyde3-phosphate[c0] <=> 1.000000 Glycerone-phosphate[c0]	1.000000 M_cpd00102_c0 <=> 1.000000 M_cpd00095_c0		0.267698	14.2653	0.267698	8.59314	0.267698	9.15317	0.267698	132.074	-3.31962	121.756	0.0357397	10.5054
R_rxn00758_c0	sn-Glycero-3-phosphocholine glycerophosphohydrolase	1.000000 H2O[c0] + 1.000000 Glycerophosphocholine[c0] => 1.000000 H+[c0] + 1.000000 Glycerol-3-phosphate[c0] + 1.000000 Choline[c0]	1.000000 M_cpd00001_c0 + 1.000000 M_cpd00507_c0 => 1.000000 M_cpd00067_c0 + 1.000000 M_cpd00080_c0 + 1.000000 M_cpd00098_c0		0	0	0	0	0	0	0	0	0	0	0	0
R_rxn00763_c0	Glycerol:NAD+ oxidoreductase	1.000000 NAD[c0] + 1.000000 Glycerol[c0] <=> 1.000000 H+[c0] + 1.000000 NADH[c0] + 1.000000 D-Glyceraldehyde[c0]	1.000000 M_cpd00003_c0 + 1.000000 M_cpd00100_c0 <=> 1.000000 M_cpd00067_c0 + 1.000000 M_cpd00004_c0 + 1.000000 M_cpd00448_c0		0.00309489	0.00309489	0.00309489	0.00309489	0.00309489	0.00309489	0.00309489	0.00309489	0.00309489	0.00309489	0.000413193	0.00041319
R_rxn00770_c0	ATP:D-ribose-5-phosphate diphosphotransferase	1.000000 ATP[c0] + 1.000000 ribose-5-phosphate[c0] <=> 1.000000 H+[c0] + 1.000000 PRPP[c0] + 1.000000 AMP[c0]	1.000000 M_cpd00002_c0 + 1.000000 M_cpd00101_c0 <=> 1.000000 M_cpd00067_c0 + 1.000000 M_cpd00103_c0 + 1.000000 M_cpd00018_c0		0.0972922	14.1114	0.0972922	8.43916	0.0972922	8.99919	0.0972922	131.92	0.0972922	124.384	0.0129893	10.4848
R_rxn00775_c0	ADP-ribose ribophosphohydrolase	1.000000 H2O[c0] + 1.000000 ADPribose[c0] => 2.000000 H+[c0] + 1.000000 AMP[c0] + 1.000000 ribose-5-phosphate[c0]	1.000000 M_cpd00001_c0 + 1.000000 M_cpd00251_c0 => 2.000000 M_cpd00067_c0 + 1.000000 M_cpd00018_c0 + 1.000000 M_cpd00101_c0		0	0	0	0	0	0	0	0	0	0	0	0
R_rxn00776_c0	uracil hydro-lyase (adding D-ribose 5-phosphate;pseudouridine-5'-phosphate-forming)	1.000000 Uracil[c0] + 1.000000 ribose-5-phosphate[c0] => 1.000000 H2O[c0] + 1.000000 Pseudouridine 5'-phosphate[c0]	1.000000 M_cpd00092_c0 + 1.000000 M_cpd00101_c0 => 1.000000 M_cpd00001_c0 + 1.000000 M_cpd00859_c0		0	0	0	0	0	0	0	0	0	0	0	0
R_rxn00777_c0	D-ribose-5-phosphate aldose-ketose-isomerase	1.000000 ribose-5-phosphate[c0] <=> 1.000000 D-Ribulose5-phosphate[c0]	1.000000 M_cpd00101_c0 <=> 1.000000 M_cpd00171_c0		-0.106026	-0.106026	-0.106026	-0.106026	-0.106026	-0.106026	-0.106026	-0.106026	-2.34616	3.48129	-0.0141554	-0.0141553
R_rxn00778_c0	D-Ribose 1,5-phosphomutase	1.000000 Ribose 1-phosphate[c0] <=> 1.000000 ribose-5-phosphate[c0]	1.000000 M_cpd00475_c0 <=> 1.000000 M_cpd00101_c0		0	14.0141	0	8.34187	0	8.9019	0	131.823	0	124.287	0	10.4718
R_rxn00781_c0	D-glyceraldehyde-3-phosphate:NAD+ oxidoreductase (phosphorylating)	1.000000 Phosphate[c0] + 1.000000 NAD[c0] + 1.000000 Glyceraldehyde3-phosphate[c0] <=> 1.000000 H+[c0] + 1.000000 NADH[c0] + 1.000000 1,3-Bisphospho-D-glycerate[c0]	1.000000 M_cpd00009_c0 + 1.000000 M_cpd00003_c0 + 1.000000 M_cpd00102_c0 <=> 1.000000 M_cpd00067_c0 + 1.000000 M_cpd00004_c0 + 1.000000 M_cpd00203_c0		-14.6222	-0.624599	-8.95004	-0.624599	-9.51007	-0.624599	-132.431	-0.624599	-122.113	2.96272	-10.553	-0.0833888
R_rxn00783_c0	2-dehydro-3-deoxy-D-galactonate-6-phosphate D-glyceraldehyde-3-phosphate-lyase (pyruvate-forming)	1.000000 2-Dehydro-3-deoxy-D-galactonate 6-phosphate[c0] <=> 1.000000 Pyruvate[c0] + 1.000000 Glyceraldehyde3-phosphate[c0]	1.000000 M_cpd00945_c0 <=> 1.000000 M_cpd00020_c0 + 1.000000 M_cpd00102_c0		0	0	0	0	0	0	0	0	0	0	0	0
R_rxn00785_c0	D-Fructose 6-phosphate:D-glyceraldehyde-3-phosphate glycolaldehyde transferase	1.000000 D-fructose-6-phosphate[c0] + 1.000000 Glyceraldehyde3-phosphate[c0] <=> 1.000000 D-Erythrose4-phosphate[c0] + 1.000000 D-Xylulose5-phosphate[c0]	1.000000 M_cpd00072_c0 + 1.000000 M_cpd00102_c0 <=> 1.000000 M_cpd00236_c0 + 1.000000 M_cpd00198_c0		0.116557	0.116557	0.116557	0.116557	0.116557	0.116557	0.116557	0.116557	-6.49078	3.70387	0.0155612	0.0155612
R_rxn00786_c0	0	1.0 D-fructose-1,6-bisphosphate[c0] <=> 1.0 Glycerone-phosphate[c0] + 1.0 Glyceraldehyde3-phosphate[c0]	1.0 M_cpd00290_c0 <=> 1.0 M_cpd00095_c0 + 1.0 M_cpd00102_c0		-14.1715	-0.173894	-8.49934	-0.173894	-9.05937	-0.173894	-131.98	-0.173894	-119.56	7.00074	-10.4928	-0.0232162
R_rxn00789_c0	1-(5-phospho-D-ribosyl)-ATP:diphosphate phospho-alpha-D-ribosyl-transferase	1.000000 ATP[c0] + 1.000000 PRPP[c0] => 1.000000 PPi[c0] + 1.000000 H+[c0] + 1.000000 Phosphoribosyl-ATP[c0]	1.000000 M_cpd00002_c0 + 1.000000 M_cpd00103_c0 => 1.000000 M_cpd00012_c0 + 1.000000 M_cpd00067_c0 + 1.000000 M_cpd01775_c0		0.0245415	0.0245415	0.0245415	0.0245415	0.0245415	0.0245415	0.0245415	0.0245415	0.0245415	0.0245415	0.00327648	0.00327647
R_rxn00790_c0	5-phosphoribosylamine:diphosphate phospho-alpha-D-ribosyltransferase (glutamate-amidating)	1.000000 PRPP[c0] + 1.000000 H2O[c0] + 1.000000 L-Glutamine[c0] => 1.000000 PPi[c0] + 1.000000 H+[c0] + 1.000000 L-Glutamate[c0] + 1.000000 5-Phosphoribosylamine[c0]	1.000000 M_cpd00103_c0 + 1.000000 M_cpd00001_c0 + 1.000000 M_cpd00053_c0 => 1.000000 M_cpd00012_c0 + 1.000000 M_cpd00067_c0 + 1.000000 M_cpd00023_c0 + 1.000000 M_cpd01982_c0		0.0179735	0.0179735	0.0179735	0.0179735	0.0179735	0.0179735	0.0179735	0.0179735	0.0179735	0.0179735	0.0023996	0.0023996
R_rxn00791_c0	N-(5-Phospho-D-ribosyl)anthranilate:pyrophosphate phosphoribosyl-transferase	1.000000 PRPP[c0] + 1.000000 Anthranilate[c0] => 1.000000 PPi[c0] + 1.000000 H+[c0] + 1.000000 N-5-phosphoribosyl-anthranilate[c0]	1.000000 M_cpd00103_c0 + 1.000000 M_cpd00093_c0 => 1.000000 M_cpd00012_c0 + 1.000000 M_cpd00067_c0 + 1.000000 M_cpd02642_c0		0.0200794	0.0200794	0.0200794	0.0200794	0.0200794	0.0200794	0.0200794	0.0200794	0.0200794	0.0200794	0.00268076	0.00268075
R_rxn00798_c0	D-ribose aldose-ketose-isomerase	1.000000 D-Ribose[c0] <=> 1.000000 D-Ribulose[c0]	1.000000 M_cpd00105_c0 <=> 1.000000 M_cpd00258_c0		0	0	0	0	0	0	0	0	0	0	0	0
R_rxn00799_c0	(S)-malate hydro-lyase (fumarate-forming)	1.000000 L-Malate[c0] <=> 1.000000 H2O[c0] + 1.000000 Fumarate[c0]	1.000000 M_cpd00130_c0 <=> 1.000000 M_cpd00001_c0 + 1.000000 M_cpd00106_c0		-7.33344	-0.158808	-2.85317	-0.158808	-2.85317	-0.158808	-2.85317	-0.144408	-11.8137	2.09572	-0.380921	-0.0212021
R_rxn00800_c0	N6-(1,2-dicarboxyethyl)AMP AMP-lyase (fumarate-forming)	1.000000 Adenylosuccinate[c0] <=> 1.000000 AMP[c0] + 1.000000 Fumarate[c0]	1.000000 M_cpd02375_c0 <=> 1.000000 M_cpd00018_c0 + 1.000000 M_cpd00106_c0		0	7.17463	0	2.69436	0	2.69436	0	2.69436	0	7.17463	0	0.359719
R_rxn00802_c0	2-(Nomega-L-arginino)succinate arginine-lyase (fumarate-forming)	1.000000 L-Argininosuccinate[c0] <=> 1.000000 Fumarate[c0] + 1.000000 L-Arginine[c0]	1.000000 M_cpd02152_c0 <=> 1.000000 M_cpd00106_c0 + 1.000000 M_cpd00051_c0		0.0563338	7.23096	0.0563338	2.7507	0.0563338	2.7507	0.0563338	2.7507	0.0563338	7.23096	0.00752101	0.36724
R_rxn00806_c0	L-Leucine:2-oxoglutarate aminotransferase	1.000000 2-Oxoglutarate[c0] + 1.000000 L-Leucine[c0] <=> 1.000000 L-Glutamate[c0] + 1.000000 4MOP[c0]	1.000000 M_cpd00024_c0 + 1.000000 M_cpd00107_c0 <=> 1.000000 M_cpd00023_c0 + 1.000000 M_cpd00200_c0		-0.077222	-0.077222	-0.077222	-0.077222	-0.077222	-0.077222	-0.077222	-0.077222	-0.077222	-0.077222	-0.0103097	-0.0103097
R_rxn00830_c0	Isopentenyl-diphosphate delta3-delta2-isomerase	1.000000 Isopentenyldiphosphate[c0] <=> 1.000000 DMAPP[c0]	1.000000 M_cpd00113_c0 <=> 1.000000 M_cpd00202_c0		-0.0852942	0.00906942	-0.0852943	0.00906942	-0.0852943	0.00906942	-0.0852943	0.00906942	-0.875929	0.122017	-0.0113875	0.00121084
R_rxn00831_c0	Inosine 5'-monophosphate phosphohydrolase	1.000000 IMP[c0] + 1.000000 H2O[c0] => 1.000000 Phosphate[c0] + 1.000000 Inosine[c0]	1.000000 M_cpd00114_c0 + 1.000000 M_cpd00001_c0 => 1.000000 M_cpd00009_c0 + 1.000000 M_cpd00246_c0		0	0	0	0	0	0	0	0	0	0	0	0
R_rxn00832_c0	IMP 1,2-hydrolase (decyclizing)	1.000000 IMP[c0] + 1.000000 H2O[c0] <=> 1.000000 FAICAR[c0]	1.000000 M_cpd00114_c0 + 1.000000 M_cpd00001_c0 <=> 1.000000 M_cpd02884_c0		-0.042515	-0.042515	-0.042515	-0.042515	-0.042515	-0.042515	-0.042515	-0.042515	-0.042515	-0.042515	-0.00567608	-0.00567608
R_rxn00834_c0	IMP:NAD+ oxidoreductase	1.000000 IMP[c0] + 1.000000 H2O[c0] + 1.000000 NAD[c0] <=> 1.000000 H+[c0] + 1.000000 NADH[c0] + 1.000000 XMP[c0]	1.000000 M_cpd00114_c0 + 1.000000 M_cpd00001_c0 + 1.000000 M_cpd00003_c0 <=> 1.000000 M_cpd00067_c0 + 1.000000 M_cpd00004_c0 + 1.000000 M_cpd00497_c0		0.0164265	0.0164265	0.0164265	0.0164265	0.0164265	0.0164265	0.0164265	0.0164265	0.0164265	0.0164265	0.00219307	0.00219305
R_rxn00838_c0	IMP:L-aspartate ligase (GDP-forming)	1.000000 IMP[c0] + 1.000000 L-Aspartate[c0] + 1.000000 GTP[c0] => 2.000000 H+[c0] + 1.000000 Phosphate[c0] + 1.000000 GDP[c0] + 1.000000 Adenylosuccinate[c0]	1.000000 M_cpd00114_c0 + 1.000000 M_cpd00041_c0 + 1.000000 M_cpd00038_c0 => 2.000000 M_cpd00067_c0 + 1.000000 M_cpd00009_c0 + 1.000000 M_cpd00031_c0 + 1.000000 M_cpd02375_c0		0	7.17463	0	2.69436	0	2.69436	0	2.69436	0	7.17463	0	0.359719
R_rxn00839_c0	ATP:dADP phosphotransferase	1.000000 ATP[c0] + 1.000000 dADP[c0] <=> 1.000000 ADP[c0] + 1.000000 dATP[c0]	1.000000 M_cpd00002_c0 + 1.000000 M_cpd00177_c0 <=> 1.000000 M_cpd00008_c0 + 1.000000 M_cpd00115_c0		0	0	0	0	0	0	0	0	0	0	0	0
R_rxn00843_c0	Methane,NADH:oxygen oxidoreductase (hydroxylating)	1.0 Methane[c0] + 1.0 NADH[c0] + 1.0 H+[c0] + 1.0 O2[c0] => 1.0 H2O[c0] + 1.0 NAD[c0] + 1.0 Methanol[c0]	1.0 M_cpd01024_c0 + 1.0 M_cpd00004_c0 + 1.0 M_cpd00067_c0 + 1.0 M_cpd00007_c0 => 1.0 M_cpd00001_c0 + 1.0 M_cpd00003_c0 + 1.0 M_cpd00116_c0		14.894	19.3742	14.894	14.894	14.894	14.894	14.894	14.894	7.4165	19.3742	1.98846	1.98846
R_rxn00847_c0	rxn00847	1.000000 Methanol[c0] + 1.000000 Pyrroloquinoline-quinone[c0] => 1.000000 Formaldehyde[c0] + 1.000000 PQQH2[c0]	1.000000 M_cpd00116_c0 + 1.000000 M_cpd00097_c0 => 1.000000 M_cpd00055_c0 + 1.000000 M_cpd00986_c0		14.894	19.3742	14.894	14.894	14.894	14.894	14.894	14.894	14.894	19.3742	1.98846	1.98846
R_rxn00849_c0	D-Alanine:2-oxoglutarate aminotransferase	1.000000 2-Oxoglutarate[c0] + 1.000000 D-Alanine[c0] <=> 1.000000 Pyruvate[c0] + 1.000000 D-Glutamate[c0]	1.000000 M_cpd00024_c0 + 1.000000 M_cpd00117_c0 <=> 1.000000 M_cpd00020_c0 + 1.000000 M_cpd00186_c0		0.0147807	0.0147807	0.0147807	0.0147807	0.0147807	0.0147807	0.0147807	0.0147807	0.0147807	0.0147807	0.00197333	0.00197333
R_rxn00851_c0	D-alanine:D-alanine ligase (ADP-forming)	1.000000 ATP[c0] + 2.000000 D-Alanine[c0] => 1.000000 H+[c0] + 1.000000 ADP[c0] + 1.000000 Phosphate[c0] + 1.000000 Ala-Ala[c0]	1.000000 M_cpd00002_c0 + 2.000000 M_cpd00117_c0 => 1.000000 M_cpd00067_c0 + 1.000000 M_cpd00008_c0 + 1.000000 M_cpd00009_c0 + 1.000000 M_cpd00731_c0		0.0147807	0.0147807	0.0147807	0.0147807	0.0147807	0.0147807	0.0147807	0.0147807	0.0147807	0.0147807	0.00197333	0.00197333
R_rxn00863_c0	L-histidinal:NAD+ oxidoreductase	1.000000 H2O[c0] + 1.000000 NAD[c0] + 1.000000 L-Histidinal[c0] => 2.000000 H+[c0] + 1.000000 NADH[c0] + 1.000000 L-Histidine[c0]	1.000000 M_cpd00001_c0 + 1.000000 M_cpd00003_c0 + 1.000000 M_cpd01324_c0 => 2.000000 M_cpd00067_c0 + 1.000000 M_cpd00004_c0 + 1.000000 M_cpd00119_c0		0.0245415	0.0245415	0.0245415	0.0245415	0.0245415	0.0245415	0.0245415	0.0245415	0.0245415	0.0245415	0.00327648	0.00327647
R_rxn00866_c0	L-histidine carboxy-lyase (histamine-forming)	1 H+[c0] + 1 L-Histidine[c0] => 1 CO2[c0] + 1 Histamine[c0]	1 M_cpd00067_c0 + 1 M_cpd00119_c0 => 1 M_cpd00011_c0 + 1 M_cpd00312_c0		0	0	0	0	0	0	0	0	0	0	0	0
R_rxn00867_c0	L-histidine ammonia-lyase (urocanate-forming)	1 L-Histidine[c0] => 1 NH3[c0] + 1 Urocanate[c0]	1 M_cpd00119_c0 => 1 M_cpd00013_c0 + 1 M_cpd00581_c0		0	0	0	0	0	0	0	0	0	0	0	0
R_rxn00869_c0	butanal:NAD+ oxidoreductase (CoA-acylating)	1 NAD[c0] + 1 CoA[c0] + 1 Butanal[c0] <=> 1 NADH[c0] + 1 H+[c0] + 1 Butyryl-CoA[c0]	1 M_cpd00003_c0 + 1 M_cpd00010_c0 + 1 M_cpd01011_c0 <=> 1 M_cpd00004_c0 + 1 M_cpd00067_c0 + 1 M_cpd00120_c0		0	0	0	0	0	0	0	0	0	0	0	0
R_rxn00877_c0	2-Methylpropanoyl-CoA CoA-carbonylmutase	1.000000 Isobutyryl-CoA[c0] <=> 1.000000 Butyryl-CoA[c0]	1.000000 M_cpd00481_c0 <=> 1.000000 M_cpd00120_c0		0	0	0	0	0	0	0	0	0	0	0	0
R_rxn00881_c0	1D-myo-Inositol 1-phosphate phosphohydrolase	1.000000 H2O[c0] + 1.000000 Inositol 1-phosphate[c0] => 1.000000 Phosphate[c0] + 1.000000 L-Inositol[c0]	1.000000 M_cpd00001_c0 + 1.000000 M_cpd00867_c0 => 1.000000 M_cpd00009_c0 + 1.000000 M_cpd00121_c0		0	0	0	0	0	0	0	0	0	0	0	0
R_rxn00882_c0	1D-myo-Inositol 4-phosphate phosphohydrolase	1.000000 H2O[c0] + 1.000000 Inositol 4-phosphate[c0] => 1.000000 Phosphate[c0] + 1.000000 L-Inositol[c0]	1.000000 M_cpd00001_c0 + 1.000000 M_cpd02230_c0 => 1.000000 M_cpd00009_c0 + 1.000000 M_cpd00121_c0		0	0	0	0	0	0	0	0	0	0	0	0
R_rxn00883_c0	1D-myo-Inositol 3-phosphate phosphohydrolase	1.000000 H2O[c0] + 1.000000 Inositol 3-phosphate[c0] => 1.000000 Phosphate[c0] + 1.000000 L-Inositol[c0]	1.000000 M_cpd00001_c0 + 1.000000 M_cpd02484_c0 => 1.000000 M_cpd00009_c0 + 1.000000 M_cpd00121_c0		0.000585649	0.000585649	0.000585649	0.000585649	0.000585649	0.000585649	0.000585649	0.000585649	0.000585649	0.000585649	7.81887e-05	7.81887e-05
R_rxn00898_c0	2,3-Dihydroxy-3-methylbutanoate hydro-lyase	1.000000 2,3-Dihydroxy-isovalerate[c0] => 1.000000 H2O[c0] + 1.000000 3-Methyl-2-oxobutanoate[c0]	1.000000 M_cpd02498_c0 => 1.000000 M_cpd00001_c0 + 1.000000 M_cpd00123_c0		0.265295	0.265295	0.265295	0.265295	0.265295	0.265295	0.265295	0.265295	0.265295	0.265295	0.0354189	0.0354189
R_rxn00899_c0	3-methyl-2-oxobutanoate:NAD+ oxidoreductase (CoA-mehtylpropanoylating)	1 NAD[c0] + 1 CoA[c0] + 1 3-Methyl-2-oxobutanoate[c0] <=> 1 NADH[c0] + 1 CO2[c0] + 1 Isobutyryl-CoA[c0]	1 M_cpd00003_c0 + 1 M_cpd00010_c0 + 1 M_cpd00123_c0 <=> 1 M_cpd00004_c0 + 1 M_cpd00011_c0 + 1 M_cpd00481_c0		0	0	0	0	0	0	0	0	0	0	0	0
R_rxn00902_c0	acetyl-CoA:3-methyl-2-oxobutanoate C-acetyltransferase (thioester-hydrolysing, carboxymethyl-forming)	1.000000 H2O[c0] + 1.000000 Acetyl-CoA[c0] + 1.000000 3-Methyl-2-oxobutanoate[c0] => 1.000000 H+[c0] + 1.000000 CoA[c0] + 1.000000 2-Isopropylmalate[c0]	1.000000 M_cpd00001_c0 + 1.000000 M_cpd00022_c0 + 1.000000 M_cpd00123_c0 => 1.000000 M_cpd00067_c0 + 1.000000 M_cpd00010_c0 + 1.000000 M_cpd01646_c0		0.163838	0.163838	0.163838	0.163838	0.163838	0.163838	0.163838	0.163838	0.163838	0.163838	0.0218737	0.0218736
R_rxn00903_c0	L-Valine:2-oxoglutarate aminotransferase	1.000000 2-Oxoglutarate[c0] + 1.000000 L-Valine[c0] <=> 1.000000 L-Glutamate[c0] + 1.000000 3-Methyl-2-oxobutanoate[c0]	1.000000 M_cpd00024_c0 + 1.000000 M_cpd00156_c0 <=> 1.000000 M_cpd00023_c0 + 1.000000 M_cpd00123_c0		-0.101457	-0.101457	-0.101457	-0.101457	-0.101457	-0.101457	-0.101457	-0.101457	-0.101457	-0.101457	-0.0135452	-0.0135453
R_rxn00905_c0	2-dehydropantoate formaldehyde-lyase (3-methyl-2-oxobutanoate-forming)	1.000000 2-Dehydropantoate[c0] <=> 1.000000 3-Methyl-2-oxobutanoate[c0] + 1.000000 Formaldehyde[c0]	1.000000 M_cpd00712_c0 <=> 1.000000 M_cpd00123_c0 + 1.000000 M_cpd00055_c0		-19.3742	-14.894	-14.894	-14.894	-14.894	-14.894	-14.894	-14.894	-19.3742	-8.61228	-1.98846	-1.98846
R_rxn00907_c0	5,10-methylenetetrahydrofolate:NADP+ oxidoreductase	1.0 NADP[c0] + 1.0 5,10-Methylenetetrahydromethanopterin[c0] <=> 1.0 NADPH[c0] + 1.0 5,10-Methenyltetrahydromethanopterin[c0]	1.0 M_cpd00006_c0 + 1.0 M_cpd02679_c0 <=> 1.0 M_cpd00005_c0 + 1.0 M_cpd02655_c0		0	-2.27e-08	0	-1.76e-08	0	-1.76e-08	0	-1.76e-08	0	4.48027	0	5.9e-09
R_rxn00908_c0	glycine synthase	1.000000 Glycine[c0] + 1.000000 Tetrahydrofolate[c0] + 1.000000 NAD[c0] <=> 1.000000 5-10-Methylenetetrahydrofolate[c0] + 1.000000 NH3[c0] + 1.000000 CO2[c0] + 1.000000 NADH[c0] + 1.000000 H+[c0]	1.000000 M_cpd00033_c0 + 1.000000 M_cpd00087_c0 + 1.000000 M_cpd00003_c0 <=> 1.000000 M_cpd00125_c0 + 1.000000 M_cpd00013_c0 + 1.000000 M_cpd00011_c0 + 1.000000 M_cpd00004_c0 + 1.000000 M_cpd00067_c0		-8.74242	-4.26216	-4.26216	-4.26216	-4.26216	-4.26216	-4.26216	-1.56779	-8.74242	-1.56779	-0.569032	-0.569032
R_rxn00912_c0	5,10-Methylenetetrahydrofolate:3-methyl-2-oxobutanoate hydroxymethyltransferase	1.000000 H2O[c0] + 1.000000 3-Methyl-2-oxobutanoate[c0] + 1.000000 5-10-Methylenetetrahydrofolate[c0] <=> 1.000000 Tetrahydrofolate[c0] + 1.000000 2-Dehydropantoate[c0]	1.000000 M_cpd00001_c0 + 1.000000 M_cpd00123_c0 + 1.000000 M_cpd00125_c0 <=> 1.000000 M_cpd00087_c0 + 1.000000 M_cpd00712_c0		-19.3742	-14.894	-14.894	-14.894	-14.894	-14.894	-14.894	-14.894	-19.3742	-8.61228	-1.98846	-1.98846
R_rxn00913_c0	Guanosine 5'-monophosphate phosphohydrolase	1.000000 H2O[c0] + 1.000000 GMP[c0] => 1.000000 Phosphate[c0] + 1.000000 Guanosine[c0]	1.000000 M_cpd00001_c0 + 1.000000 M_cpd00126_c0 => 1.000000 M_cpd00009_c0 + 1.000000 M_cpd00311_c0		0	13.9976	0	8.32544	0	8.88547	0	131.806	0	124.27	0	10.4696
R_rxn00915_c0	GMP:diphosphate 5-phospho-alpha-D-ribosyltransferase	1.000000 PRPP[c0] + 1.000000 Guanine[c0] => 1.000000 PPi[c0] + 1.000000 H+[c0] + 1.000000 GMP[c0]	1.000000 M_cpd00103_c0 + 1.000000 M_cpd00207_c0 => 1.000000 M_cpd00012_c0 + 1.000000 M_cpd00067_c0 + 1.000000 M_cpd00126_c0		0	14.0141	0	8.34187	0	8.9019	0	131.823	0	124.287	0	10.4718
R_rxn00917_c0	Xanthosine-5'-phosphate:L-glutamine amido-ligase (AMP-forming)	1.000000 ATP[c0] + 1.000000 H2O[c0] + 1.000000 L-Glutamine[c0] + 1.000000 XMP[c0] => 1.000000 PPi[c0] + 3.000000 H+[c0] + 1.000000 AMP[c0] + 1.000000 L-Glutamate[c0] + 1.000000 GMP[c0]	1.000000 M_cpd00002_c0 + 1.000000 M_cpd00001_c0 + 1.000000 M_cpd00053_c0 + 1.000000 M_cpd00497_c0 => 1.000000 M_cpd00012_c0 + 3.000000 M_cpd00067_c0 + 1.000000 M_cpd00018_c0 + 1.000000 M_cpd00023_c0 + 1.000000 M_cpd00126_c0		0	5.6122	0	3.34332	0	3.56733	0	52.7356	0	49.7213	0	4.18961
R_rxn00920_c0	Guanosine 3',5'-cyclic phosphate 5'-nucleotidohydrolase	1.000000 H2O[c0] + 1.000000 cGMP[c0] <=> 1.000000 H+[c0] + 1.000000 GMP[c0]	1.000000 M_cpd00001_c0 + 1.000000 M_cpd00697_c0 <=> 1.000000 M_cpd00067_c0 + 1.000000 M_cpd00126_c0		0	0	0	0	0	0	0	0	0	0	0	0
R_rxn00921_c0	4-hydroxybenzoate carboxy-lyase (phenol-forming)	1.000000 H+[c0] + 1.000000 4-Hydroxybenzoate[c0] <=> 1.000000 CO2[c0] + 1.000000 Phenol[c0]	1.000000 M_cpd00067_c0 + 1.000000 M_cpd00136_c0 <=> 1.000000 M_cpd00011_c0 + 1.000000 M_cpd00127_c0		0	0	0	0	0	0	0	0	0	0	0	0
R_rxn00927_c0	Adenosine ribohydrolase	1.000000 H2O[c0] + 1.000000 Adenosine[c0] <=> 1.000000 Adenine[c0] + 1.000000 D-Ribose[c0]	1.000000 M_cpd00001_c0 + 1.000000 M_cpd00182_c0 <=> 1.000000 M_cpd00128_c0 + 1.000000 M_cpd00105_c0		0	0	0	0	0	0	0	0	0	0	0	0
R_rxn00929_c0	L-Proline:NAD+ 5-oxidoreductase	1.000000 NAD[c0] + 1.000000 L-Proline[c0] <=> 2.000000 H+[c0] + 1.000000 NADH[c0] + 1.000000 1-Pyrroline-5-carboxylate[c0]	1.000000 M_cpd00003_c0 + 1.000000 M_cpd00129_c0 <=> 2.000000 M_cpd00067_c0 + 1.000000 M_cpd00004_c0 + 1.000000 M_cpd02431_c0		-0.0543817	7.12025	-0.0543817	2.63998	-0.0543817	2.63998	-0.0543817	2.63998	-0.0543817	7.12025	-0.00726036	0.352458
R_rxn00934_c0	(S)-Malate:CoA ligase (ADP-forming)	1.0 ATP[c0] + 1.0 L-Malate[c0] + 1.0 CoA[c0] => 1.0 ADP[c0] + 1.0 Phosphate[c0] + 1.0 Malyl-CoA[c0]	1.0 M_cpd00002_c0 + 1.0 M_cpd00130_c0 + 1.0 M_cpd00010_c0 => 1.0 M_cpd00008_c0 + 1.0 M_cpd00009_c0 + 1.0 M_cpd02662_c0		0	-2.27e-08	0	-2.27e-08	0	-2.27e-08	0	2.69436	0	7.17463	0	7.9e-09
R_rxn00937_c0	L-asparagine hydro-lyase (3-cyanoalanine-forming)	1 L-Asparagine[c0] => 1 H2O[c0] + 1 L-3-Cyanoalanine[c0]	1 M_cpd00132_c0 => 1 M_cpd00001_c0 + 1 M_cpd01651_c0		0	13.9976	0	8.32544	0	8.88547	0	131.806	0	124.27	0	10.4696
R_rxn00938_c0	Nicotinamide amidohydrolase	1.000000 H2O[c0] + 1.000000 Nicotinamide[c0] => 1.000000 NH3[c0] + 1.000000 Niacin[c0]	1.000000 M_cpd00001_c0 + 1.000000 M_cpd00133_c0 => 1.000000 M_cpd00013_c0 + 1.000000 M_cpd00218_c0		0	0	0	0	0	0	0	0	0	0	0	0
R_rxn00947_c0	Palmitate:CoA ligase (AMP-forming)	1.000000 ATP[c0] + 1.000000 CoA[c0] + 1.000000 Palmitate[c0] => 1.000000 PPi[c0] + 1.000000 H+[c0] + 1.000000 AMP[c0] + 1.000000 Palmitoyl-CoA[c0]	1.000000 M_cpd00002_c0 + 1.000000 M_cpd00010_c0 + 1.000000 M_cpd00214_c0 => 1.000000 M_cpd00012_c0 + 1.000000 M_cpd00067_c0 + 1.000000 M_cpd00018_c0 + 1.000000 M_cpd00134_c0		0	13.9976	0	8.32544	0	8.88547	0	131.806	0	124.27	0	10.4696
R_rxn00952_c0	O-acetyl-L-homoserine:hydrogen sulfide S-(3-amino-3-carboxypropyl)transferase	1.000000 H2S[c0] + 1.000000 O-Acetyl-L-homoserine[c0] <=> 1.000000 Acetate[c0] + 1.000000 Homocysteine[c0]	1.000000 M_cpd00239_c0 + 1.000000 M_cpd00790_c0 <=> 1.000000 M_cpd00029_c0 + 1.000000 M_cpd00135_c0		-14.8734	0.0362062	-8.28923	0.0362062	-8.84927	0.0362062	-131.77	0.0362062	-122.766	0.0362062	-10.4648	0.00483381
R_rxn00966_c0	chorismate pyruvate-lyase (4-hydroxybenzoate-forming)	1.000000 Chorismate[c0] => 1.000000 Pyruvate[c0] + 1.000000 4-Hydroxybenzoate[c0]	1.000000 M_cpd00216_c0 => 1.000000 M_cpd00020_c0 + 1.000000 M_cpd00136_c0		0	-5e-10	0	-4e-10	0	-4e-10	0	-4e-10	0	0.112948	0	1e-10
R_rxn00974_c0	citrate hydro-lyase (cis-aconitate-forming)	1.000000 Citrate[c0] <=> 1.000000 H2O[c0] + 1.000000 cis-Aconitate[c0]	1.000000 M_cpd00137_c0 <=> 1.000000 M_cpd00001_c0 + 1.000000 M_cpd00331_c0		0.308261	0.308261	0.308261	0.308261	0.308261	0.308261	0.293861	0.308261	0.293861	4.78853	0.0411553	0.0411553
R_rxn00985_c0	ATP:propanoate phosphotransferase	1.000000 ATP[c0] + 1.000000 Propionate[c0] <=> 1.000000 ADP[c0] + 1.000000 Propionyl phosphate[c0]	1.000000 M_cpd00002_c0 + 1.000000 M_cpd00141_c0 <=> 1.000000 M_cpd00008_c0 + 1.000000 M_cpd01844_c0		0	0	0	0	0	0	0	0	0	0	0	0
R_rxn00988_c0	Acetoacetate:CoA ligase (AMP-forming)	1.000000 ATP[c0] + 1.000000 CoA[c0] + 1.000000 Acetoacetate[c0] => 1.000000 PPi[c0] + 1.000000 H+[c0] + 1.000000 AMP[c0] + 1.000000 Acetoacetyl-CoA[c0]	1.000000 M_cpd00002_c0 + 1.000000 M_cpd00010_c0 + 1.000000 M_cpd00142_c0 => 1.000000 M_cpd00012_c0 + 1.000000 M_cpd00067_c0 + 1.000000 M_cpd00018_c0 + 1.000000 M_cpd00279_c0		0	0	0	0	0	0	0	0	0	0	0	0
R_rxn01000_c0	prephenate hydro-lyase (decarboxylating; phenylpyruvate-forming)	1.000000 H+[c0] + 1.000000 Prephenate[c0] => 1.000000 H2O[c0] + 1.000000 CO2[c0] + 1.000000 Phenylpyruvate[c0]	1.000000 M_cpd00067_c0 + 1.000000 M_cpd00219_c0 => 1.000000 M_cpd00001_c0 + 1.000000 M_cpd00011_c0 + 1.000000 M_cpd00143_c0		0.058537	0.058537	0.058537	0.058537	0.058537	0.058537	0.058537	0.058537	0.058537	0.058537	0.00781515	0.00781513
R_rxn01009_c0	UDP-D-glucuronate carboxy-lyase (UDP-D-apiose-forming)	1 H+[c0] + 1 UDPglucuronate[c0] => 1 CO2[c0] + 1 UDP-apiose[c0]	1 M_cpd00067_c0 + 1 M_cpd00144_c0 => 1 M_cpd00011_c0 + 1 M_cpd01140_c0		0	0	0	0	0	0	0	0	0	0	0	0
R_rxn01011_c0	D-Glycerate:NAD+ 2-oxidoreductase	1.000000 Hydroxypyruvate[c0] + 1.000000 NADH[c0] + 1.000000 H+[c0] => 1.000000 Glycerate[c0] + 1.000000 NAD[c0]	1.000000 M_cpd00145_c0 + 1.000000 M_cpd00004_c0 + 1.000000 M_cpd00067_c0 => 1.000000 M_cpd00223_c0 + 1.000000 M_cpd00003_c0		2.09281	6.57307	6.57307	6.57307	6.57307	6.57307	6.57307	11.9762	2.09281	16.4565	0.877557	0.877557
R_rxn01018_c0	carbamoyl-phosphate:L-aspartate carbamoyltransferase	1.000000 L-Aspartate[c0] + 1.000000 Carbamoylphosphate[c0] => 1.000000 H+[c0] + 1.000000 Phosphate[c0] + 1.000000 N-Carbamoyl-L-aspartate[c0]	1.000000 M_cpd00041_c0 + 1.000000 M_cpd00146_c0 => 1.000000 M_cpd00067_c0 + 1.000000 M_cpd00009_c0 + 1.000000 M_cpd00343_c0		0.0328979	0.0328978	0.0328979	0.0328978	0.0328979	0.0328978	0.0328979	0.0328978	0.0328979	0.0328978	0.00439212	0.0043921
R_rxn01019_c0	Carbamoyl-phosphate:L-ornithine carbamoyltransferase	1.000000 Ornithine[c0] + 1.000000 Carbamoylphosphate[c0] => 1.000000 H+[c0] + 1.000000 Phosphate[c0] + 1.000000 Citrulline[c0]	1.000000 M_cpd00064_c0 + 1.000000 M_cpd00146_c0 => 1.000000 M_cpd00067_c0 + 1.000000 M_cpd00009_c0 + 1.000000 M_cpd00274_c0		0.0563338	7.23096	0.0563338	2.7507	0.0563338	2.7507	0.0563338	2.7507	0.0563338	7.23096	0.00752101	0.36724
R_rxn01022_c0	S-methyl-5'-thioadenosine:phosphate S-methyl-5-thio-alpha-D-ribosyl-transferase	1.000000 Phosphate[c0] + 1.000000 5-Methylthioadenosine[c0] <=> 1.000000 methylthioribose-1-phosphate[c0] + 1.000000 Adenine[c0]	1.000000 M_cpd00009_c0 + 1.000000 M_cpd00147_c0 <=> 1.000000 M_cpd02574_c0 + 1.000000 M_cpd00128_c0		0.0009	0.0009	0.0009	0.0009	0.0009	0.0009	0.0009	0.0009	0.0009	0.0009	0.000120157	0.000120157
R_rxn01025_c0	5-Methylcytosine aminohydrolase	1.000000 H+[c0] + 1.000000 H2O[c0] + 1.000000 5-Methylcytosine[c0] => 1.000000 NH3[c0] + 1.000000 Thymine[c0]	1.000000 M_cpd00067_c0 + 1.000000 M_cpd00001_c0 + 1.000000 M_cpd01587_c0 => 1.000000 M_cpd00013_c0 + 1.000000 M_cpd00151_c0		0	0	0	0	0	0	0	0	0	0	0	0
R_rxn01029_c0	Agmatine iminohydrolase	1.000000 H2O[c0] + 1.000000 Agmatine[c0] => 1.000000 NH3[c0] + 1.000000 N-Carbamoylputrescine[c0]	1.000000 M_cpd00001_c0 + 1.000000 M_cpd00152_c0 => 1.000000 M_cpd00013_c0 + 1.000000 M_cpd00341_c0		0	0	0	0	0	0	0	0	0	0	0	0
R_rxn01044_c0	D-xylose aldose-ketose-isomerase	1.000000 Xylose[c0] <=> 1.000000 D-Lyxulose[c0]	1.000000 M_cpd00154_c0 <=> 1.000000 M_cpd00259_c0		0	0	0	0	0	0	0	0	0	0	0	0
R_rxn01053_c0	(S)-lactaldehyde:NAD+ oxidoreductase	1 H2O[c0] + 1 NAD[c0] + 1 L-Lactaldehyde[c0] <=> 1 NADH[c0] + 2 H+[c0] + 1 L-Lactate[c0]	1 M_cpd00001_c0 + 1 M_cpd00003_c0 + 1 M_cpd00334_c0 <=> 1 M_cpd00004_c0 + 2 M_cpd00067_c0 + 1 M_cpd00159_c0		0	0	0	0	0	0	0	0	0	0	0	0
R_rxn01066_c0	cholesterol ester acylhydrolase	1.000000 H2O[c0] + 1.000000 Cholesterol ester[c0] <=> 1.000000 H+[c0] + 1.000000 Carboxylic acid[c0] + 1.000000 Cholesterol[c0]	1.000000 M_cpd00001_c0 + 1.000000 M_cpd01664_c0 <=> 1.000000 M_cpd00067_c0 + 1.000000 M_cpd00049_c0 + 1.000000 M_cpd00160_c0		0	0	0	0	0	0	0	0	0	0	0	0
R_rxn01068_c0	L-threonine:NAD+ oxidoreductase	1.000000 NAD[c0] + 1.000000 L-Threonine[c0] <=> 1.000000 H+[c0] + 1.000000 NADH[c0] + 1.000000 L-2-Amino-acetoacetate[c0]	1.000000 M_cpd00003_c0 + 1.000000 M_cpd00161_c0 <=> 1.000000 M_cpd00067_c0 + 1.000000 M_cpd00004_c0 + 1.000000 M_cpd02211_c0		-0.0829669	-0.0829669	-0.0829669	-0.0829669	-0.0829669	-0.0829669	-0.0829669	2.6114	-0.0829669	7.09166	-0.0110767	-0.0110767
R_rxn01069_c0	O-phospho-L-homoserine phosphate-lyase (adding water;L-threonine-forming)	1.000000 H2O[c0] + 1.000000 O-Phospho-L-homoserine[c0] => 1.000000 Phosphate[c0] + 1.000000 L-Threonine[c0]	1.000000 M_cpd00001_c0 + 1.000000 M_cpd00809_c0 => 1.000000 M_cpd00009_c0 + 1.000000 M_cpd00161_c0		0	-2.27e-08	0	-2.27e-08	0	-2.27e-08	0	2.69436	0	7.17463	0	7.9e-09
R_rxn01073_c0	sn-Glycero-3-phosphoethanolamine glycerophosphohydrolase	1.000000 H2O[c0] + 1.000000 Glycerophosphoethanolamine[c0] => 1.000000 H+[c0] + 1.000000 Glycerol-3-phosphate[c0] + 1.000000 Aminoethanol[c0]	1.000000 M_cpd00001_c0 + 1.000000 M_cpd00908_c0 => 1.000000 M_cpd00067_c0 + 1.000000 M_cpd00080_c0 + 1.000000 M_cpd00162_c0		0	0	0	0	0	0	0	0	0	0	0	0
R_rxn01100_c0	ATP:3-phospho-D-glycerate 1-phosphotransferase	1.000000 ATP[c0] + 1.000000 3-Phosphoglycerate[c0] <=> 1.000000 ADP[c0] + 1.000000 1,3-Bisphospho-D-glycerate[c0]	1.000000 M_cpd00002_c0 + 1.000000 M_cpd00169_c0 <=> 1.000000 M_cpd00008_c0 + 1.000000 M_cpd00203_c0		0.624599	28.6199	0.624599	17.2755	0.624599	18.3955	0.624599	264.237	-2.96272	242.267	0.0833888	21.0226
R_rxn01101_c0	3-Phospho-D-glycerate:NAD+ 2-oxidoreductase	1.000000 NAD[c0] + 1.000000 3-Phosphoglycerate[c0] <=> 1.000000 H+[c0] + 1.000000 NADH[c0] + 1.000000 3-Phosphonooxypyruvate[c0]	1.000000 M_cpd00003_c0 + 1.000000 M_cpd00169_c0 <=> 1.000000 M_cpd00067_c0 + 1.000000 M_cpd00004_c0 + 1.000000 M_cpd02069_c0		0	15.3259	2.65643	10.9819	2.65643	11.5419	2.65643	135.136	0	122.656	0.354655	10.8243
R_rxn01102_c0	ATP:(R)-glycerate 3-phosphotransferase	1.000000 ATP[c0] + 1.000000 Glycerate[c0] <=> 1.000000 H+[c0] + 1.000000 ADP[c0] + 1.000000 3-Phosphoglycerate[c0]	1.000000 M_cpd00002_c0 + 1.000000 M_cpd00223_c0 <=> 1.000000 M_cpd00067_c0 + 1.000000 M_cpd00008_c0 + 1.000000 M_cpd00169_c0		2.0959	6.57617	6.57617	6.57617	6.57617	6.57617	6.57617	11.9793	2.0959	16.4596	0.87797	0.87797
R_rxn01103_c0	3-Phospho-D-glyceroyl phosphate phosphohydrolase	1.000000 H2O[c0] + 1.000000 1,3-Bisphospho-D-glycerate[c0] => 1.000000 H+[c0] + 1.000000 Phosphate[c0] + 1.000000 3-Phosphoglycerate[c0]	1.000000 M_cpd00001_c0 + 1.000000 M_cpd00203_c0 => 1.000000 M_cpd00067_c0 + 1.000000 M_cpd00009_c0 + 1.000000 M_cpd00169_c0		0	27.9953	0	16.6509	0	17.7709	0	263.613	0	240.308	0	20.9393
R_rxn01106_c0	2-Phospho-D-glycerate 2,3-phosphomutase	1.000000 2-Phospho-D-glycerate[c0] <=> 1.000000 3-Phosphoglycerate[c0]	1.000000 M_cpd00482_c0 <=> 1.000000 M_cpd00169_c0		-4.1438	11.6144	-3.29514	5.0303	-3.29514	5.59034	-3.29514	128.511	-7.7754	120.417	-0.439927	10.0297
R_rxn01107_c0	D-Glucono-1,5-lactone lactonohydrolase	1.000000 H2O[c0] + 1.000000 Gluconolactone[c0] => 1.000000 H+[c0] + 1.000000 GLCN[c0]	1.000000 M_cpd00001_c0 + 1.000000 M_cpd00170_c0 => 1.000000 M_cpd00067_c0 + 1.000000 M_cpd00222_c0		0	0	0	0	0	0	0	0	0	0	0	0
R_rxn01115_c0	6-phospho-D-gluconate:NADP+ 2-oxidoreductase (decarboxylating)	1.000000 NADP[c0] + 1.000000 6-Phospho-D-gluconate[c0] => 1.000000 CO2[c0] + 1.000000 NADPH[c0] + 1.000000 D-Ribulose5-phosphate[c0]	1.000000 M_cpd00006_c0 + 1.000000 M_cpd00284_c0 => 1.000000 M_cpd00011_c0 + 1.000000 M_cpd00005_c0 + 1.000000 M_cpd00171_c0		0	-3.41e-08	0	-2.64e-08	0	-2.64e-08	0	-2.64e-08	0	6.7204	0	8.8e-09
R_rxn01116_c0	D-Ribulose-5-phosphate 3-epimerase	1.000000 D-Ribulose5-phosphate[c0] <=> 1.000000 D-Xylulose5-phosphate[c0]	1.000000 M_cpd00171_c0 <=> 1.000000 M_cpd00198_c0		-0.107822	-0.107822	-0.107822	-0.107822	-0.107822	-0.107822	-0.107822	-0.107822	-7.28245	4.37244	-0.0143951	-0.0143951
R_rxn01117_c0	D-arabinose-5-phosphate aldose-ketose-isomerase	1.000000 D-Ribulose5-phosphate[c0] => 1.000000 D-Arabinose5-phosphate[c0]	1.000000 M_cpd00171_c0 => 1.000000 M_cpd00817_c0		0.00167328	0.00167328	0.00167328	0.00167328	0.00167328	0.00167328	0.00167328	0.00167328	0.00167328	0.00167328	0.000223396	0.000223389
R_rxn01127_c0	ATP:dAMP phosphotransferase	1.000000 H+[c0] + 1.000000 ATP[c0] + 1.000000 dAMP[c0] <=> 1.000000 ADP[c0] + 1.000000 dADP[c0]	1.000000 M_cpd00067_c0 + 1.000000 M_cpd00002_c0 + 1.000000 M_cpd00294_c0 <=> 1.000000 M_cpd00008_c0 + 1.000000 M_cpd00177_c0		0	0	0	0	0	0	0	0	0	0	0	0
R_rxn01135_c0	Oxalate:CoA ligase (AMP-forming)	1.000000 ATP[c0] + 1.000000 CoA[c0] + 1.000000 Oxalate[c0] <=> 1.000000 PPi[c0] + 1.000000 AMP[c0] + 1.000000 Oxalyl-CoA[c0]	1.000000 M_cpd00002_c0 + 1.000000 M_cpd00010_c0 + 1.000000 M_cpd00180_c0 <=> 1.000000 M_cpd00012_c0 + 1.000000 M_cpd00018_c0 + 1.000000 M_cpd00262_c0		0	0	0	0	0	0	0	0	0	0	0	0
R_rxn01145_c0	Thymidylate 5'-phosphohydrolase	1.000000 H2O[c0] + 1.000000 dTMP[c0] => 1.000000 Phosphate[c0] + 1.000000 Thymidine[c0]	1.000000 M_cpd00001_c0 + 1.000000 M_cpd00298_c0 => 1.000000 M_cpd00009_c0 + 1.000000 M_cpd00184_c0		0	0	0	0	0	0	0	0	0	0	0	0
R_rxn01146_c0	thymidine:phosphate deoxy-alpha-D-ribosyltransferase	1.000000 Phosphate[c0] + 1.000000 Thymidine[c0] <=> 1.000000 Thymine[c0] + 1.000000 deoxyribose-1-phosphate[c0]	1.000000 M_cpd00009_c0 + 1.000000 M_cpd00184_c0 <=> 1.000000 M_cpd00151_c0 + 1.000000 M_cpd00509_c0		0	0	0	0	0	0	0	0	0	0	0	0
R_rxn01154_c0	Pyridoxamine-5'-phosphate:2-oxoglutarate aminotransferase (D-glutamate-forming)	1 2-Oxoglutarate[c0] + 1 Pyridoxamine phosphate[c0] <=> 1 Pyridoxal phosphate[c0] + 1 D-Glutamate[c0]	1 M_cpd00024_c0 + 1 M_cpd00493_c0 <=> 1 M_cpd00016_c0 + 1 M_cpd00186_c0		0	0	0	0	0	0	0	0	0	0	0	0
R_rxn01157_c0	D-glutamate hydro-lyase (cyclizing; 5-oxo-D-proline-forming)	1.000000 D-Glutamate[c0] <=> 1.000000 H2O[c0] + 1.000000 5-Oxo-D-proline[c0]	1.000000 M_cpd00186_c0 <=> 1.000000 M_cpd00001_c0 + 1.000000 M_cpd01512_c0		0	0	0	0	0	0	0	0	0	0	0	0
R_rxn01169_c0	ATP:beta-D-glucose 6-phosphotransferase	1.000000 ATP[c0] + 1.000000 beta-D-Glucose[c0] <=> 1.000000 H+[c0] + 1.000000 ADP[c0] + 1.000000 beta-D-Glucose 6-phosphate[c0]	1.000000 M_cpd00002_c0 + 1.000000 M_cpd00190_c0 <=> 1.000000 M_cpd00067_c0 + 1.000000 M_cpd00008_c0 + 1.000000 M_cpd00863_c0		0	0	0	0	0	0	0	0	0	0	0	0
R_rxn01187_c0	D-Xylulose 5-phosphate D-glyceraldehyde-3-phosphate-lyase (adding phosphate; acetyl-phosphate-forming)	1.000000 Phosphate[c0] + 1.000000 D-Xylulose5-phosphate[c0] => 1.000000 H2O[c0] + 1.000000 Glyceraldehyde3-phosphate[c0] + 1.000000 Acetylphosphate[c0]	1.000000 M_cpd00009_c0 + 1.000000 M_cpd00198_c0 => 1.000000 M_cpd00001_c0 + 1.000000 M_cpd00102_c0 + 1.000000 M_cpd00196_c0		0	-1.7e-08	0	-1.7e-08	0	-1.7e-08	0	-5.28e-08	0	9.91101	0	5.9e-09
R_rxn01188_c0	3-dehydroshikimate hydro-lyase	1 3-Dehydroshikimate[c0] => 1 H2O[c0] + 1 Protocatechuate[c0]	1 M_cpd01716_c0 => 1 M_cpd00001_c0 + 1 M_cpd00197_c0		0	0	0	0	0	0	0	0	0	0	0	0
R_rxn01193_c0	Protocatechuate:oxygen 4,5-oxidoreductase (decyclizing)	1 O2[c0] + 1 Protocatechuate[c0] => 1 H+[c0] + 1 4-Carboxy-2-hydroxymuconate semialdehyde[c0]	1 M_cpd00007_c0 + 1 M_cpd00197_c0 => 1 M_cpd00067_c0 + 1 M_cpd02734_c0		0	0	0	0	0	0	0	0	0	0	0	0
R_rxn01200_c0	Sedoheptulose-7-phosphate:D-glyceraldehyde-3-phosphate glycolaldehyde transferase	1.000000 Glyceraldehyde3-phosphate[c0] + 1.000000 Sedoheptulose7-phosphate[c0] <=> 1.000000 ribose-5-phosphate[c0] + 1.000000 D-Xylulose5-phosphate[c0]	1.000000 M_cpd00102_c0 + 1.000000 M_cpd00238_c0 <=> 1.000000 M_cpd00101_c0 + 1.000000 M_cpd00198_c0		-0.00873413	-0.00873416	-0.00873413	-0.00873416	-0.00873413	-0.00873416	-0.00873413	-0.00873416	-2.24887	3.57858	-0.00116608	-0.00116607
R_rxn01207_c0	4-methyl-2-oxopentanoate:NAD+ oxidoreductase (CoA-mehtylpropanoylating)	1.000000 CoA[c0] + 1.000000 NAD[c0] + 1.000000 4MOP[c0] => 1.000000 NADH[c0] + 1.000000 CO2[c0] + 1.000000 Isovaleryl-CoA[c0]	1.000000 M_cpd00010_c0 + 1.000000 M_cpd00003_c0 + 1.000000 M_cpd00200_c0 => 1.000000 M_cpd00004_c0 + 1.000000 M_cpd00011_c0 + 1.000000 M_cpd01882_c0		0.0866162	0.0866162	0.0866162	0.0866162	0.0866162	0.0866162	0.0866162	0.0866162	0.0866162	0.0866162	0.0115639	0.0115639
R_rxn01208_c0	R01652	1.000000 H+[c0] + 1.000000 2-isopropyl-3-oxosuccinate[c0] => 1.000000 CO2[c0] + 1.000000 4MOP[c0]	1.000000 M_cpd00067_c0 + 1.000000 M_cpd02605_c0 => 1.000000 M_cpd00011_c0 + 1.000000 M_cpd00200_c0		0.163838	0.163838	0.163838	0.163838	0.163838	0.163838	0.163838	0.163838	0.163838	0.163838	0.0218737	0.0218736
R_rxn01210_c0	10-Formyltetrahydrofolate:L-glutamate ligase (ADP-forming)	1.000000 ATP[c0] + 1.000000 L-Glutamate[c0] + 1.000000 10-Formyltetrahydrofolate[c0] => 1.000000 H+[c0] + 1.000000 ADP[c0] + 1.000000 Phosphate[c0] + 1.000000 10-Formyl-THF-L-glutamate[c0]	1.000000 M_cpd00002_c0 + 1.000000 M_cpd00023_c0 + 1.000000 M_cpd00201_c0 => 1.000000 M_cpd00067_c0 + 1.000000 M_cpd00008_c0 + 1.000000 M_cpd00009_c0 + 1.000000 M_cpd03524_c0		0	0	0	0	0	0	0	0	0	0	0	0
R_rxn01211_c0	5,10-Methenyltetrahydrofolate 5-hydrolase (decyclizing)	1.000000 H2O[c0] + 1.000000 5-10-Methenyltetrahydrofolate[c0] <=> 1.000000 H+[c0] + 1.000000 10-Formyltetrahydrofolate[c0]	1.000000 M_cpd00001_c0 + 1.000000 M_cpd00347_c0 <=> 1.000000 M_cpd00067_c0 + 1.000000 M_cpd00201_c0		0	0	0	0	0	0	0	0	0	0	0	0
R_rxn01213_c0	GPPSYN-RXN	1.000000 Isopentenyldiphosphate[c0] + 1.000000 DMAPP[c0] => 1.000000 PPi[c0] + 1.000000 H+[c0] + 1.000000 Geranyldiphosphate[c0]	1.000000 M_cpd00113_c0 + 1.000000 M_cpd00202_c0 => 1.000000 M_cpd00012_c0 + 1.000000 M_cpd00067_c0 + 1.000000 M_cpd00283_c0		0.00906943	0.00906942	0.00906943	0.00906942	0.00906943	0.00906942	0.00906943	0.00906942	0.00906943	0.122017	0.00121084	0.00121084
R_rxn01215_c0	3-phospho-D-glyceroyl-phosphate:alpha-D-glucose-1-phosphate 6-phosphotransferase	1.000000 H+[c0] + 1.000000 1,3-Bisphospho-D-glycerate[c0] + 1.000000 Glucose-1-phosphate[c0] <=> 1.000000 3-Phosphoglycerate[c0] + 1.000000 alpha-D-glucose-1,6-biphosphate[c0]	1.000000 M_cpd00067_c0 + 1.000000 M_cpd00203_c0 + 1.000000 M_cpd00089_c0 <=> 1.000000 M_cpd00169_c0 + 1.000000 M_cpd00907_c0		0	0	0	0	0	0	0	0	0	0	0	0
R_rxn01216_c0	3-phospho-D-glycerate 1,2-phosphomutase	1.000000 H+[c0] + 1.000000 1,3-Bisphospho-D-glycerate[c0] <=> 1.000000 DPG[c0]	1.000000 M_cpd00067_c0 + 1.000000 M_cpd00203_c0 <=> 1.000000 M_cpd00853_c0		0	0	0	0	0	0	0	0	0	0	0	0
R_rxn01218_c0	2'-Deoxycytidine 5'-monophosphate phosphohydrolase	1.000000 H2O[c0] + 1.000000 dCMP[c0] => 1.000000 Phosphate[c0] + 1.000000 Deoxycytidine[c0]	1.000000 M_cpd00001_c0 + 1.000000 M_cpd00206_c0 => 1.000000 M_cpd00009_c0 + 1.000000 M_cpd00654_c0		0	0	0	0	0	0	0	0	0	0	0	0
R_rxn01219_c0	ATP:dCMP phosphotransferase	1.000000 H+[c0] + 1.000000 ATP[c0] + 1.000000 dCMP[c0] <=> 1.000000 ADP[c0] + 1.000000 dCDP[c0]	1.000000 M_cpd00067_c0 + 1.000000 M_cpd00002_c0 + 1.000000 M_cpd00206_c0 <=> 1.000000 M_cpd00008_c0 + 1.000000 M_cpd00533_c0		0	0	0	0	0	0	0	0	0	0	0	0
R_rxn01225_c0	Guanine aminohydrolase	1.000000 H+[c0] + 1.000000 H2O[c0] + 1.000000 Guanine[c0] => 1.000000 NH3[c0] + 1.000000 XAN[c0]	1.000000 M_cpd00067_c0 + 1.000000 M_cpd00001_c0 + 1.000000 M_cpd00207_c0 => 1.000000 M_cpd00013_c0 + 1.000000 M_cpd00309_c0		0	13.9976	0	8.32544	0	8.88547	0	131.806	0	124.27	0	10.4696
R_rxn01241_c0	Dihydrolipoamide:NAD+ oxidoreductase	1.000000 NAD[c0] + 1.000000 Dihydrolipoamide[c0] <=> 1.000000 H+[c0] + 1.000000 NADH[c0] + 1.000000 Lipoamide[c0]	1.000000 M_cpd00003_c0 + 1.000000 M_cpd00449_c0 <=> 1.000000 M_cpd00067_c0 + 1.000000 M_cpd00004_c0 + 1.000000 M_cpd00213_c0		-0.36424	-0.36424	-0.36424	-0.36424	-0.36424	-0.36424	-0.36424	-0.36424	-0.36424	4.11603	-0.0486288	-0.0486289
R_rxn01255_c0	5-O-(1-Carboxyvinyl)-3-phosphoshikimate phosphate-lyase (chorismate-forming)	1.000000 5-O--1-Carboxyvinyl-3-phosphoshikimate[c0] => 1.000000 Phosphate[c0] + 1.000000 Chorismate[c0]	1.000000 M_cpd00932_c0 => 1.000000 M_cpd00009_c0 + 1.000000 M_cpd00216_c0		0.12216	0.12216	0.12216	0.12216	0.12216	0.12216	0.12216	0.12216	0.12216	0.235108	0.0163093	0.0163093
R_rxn01256_c0	Chorismate pyruvatemutase	1.000000 Chorismate[c0] => 1.000000 Prephenate[c0]	1.000000 M_cpd00216_c0 => 1.000000 M_cpd00219_c0		0.0975802	0.0975802	0.0975802	0.0975802	0.0975802	0.0975802	0.0975802	0.0975802	0.0975802	0.0975802	0.0130277	0.0130277
R_rxn01257_c0	chorismate:L-glutamine aminotransferase	1.000000 L-Glutamine[c0] + 1.000000 Chorismate[c0] <=> 1.000000 L-Glutamate[c0] + 1.000000 ADC[c0]	1.000000 M_cpd00053_c0 + 1.000000 M_cpd00216_c0 <=> 1.000000 M_cpd00023_c0 + 1.000000 M_cpd08210_c0		0.0027	0.0027	0.0027	0.0027	0.0027	0.0027	0.0027	0.0027	0.0027	0.0027	0.000360471	0.00036047
R_rxn01258_c0	chorismate hydroxymutase	1.000000 Chorismate[c0] => 1.000000 Isochorismate[c0]	1.000000 M_cpd00216_c0 => 1.000000 M_cpd00658_c0		0.0018	0.0018	0.0018	0.0018	0.0018	0.0018	0.0018	0.0018	0.0018	0.0018	0.000240314	0.000240314
R_rxn01265_c0	Nicotinate D-ribonucleotide:diphosphate phosphoribosyltransferase	1.000000 PPi[c0] + 1.000000 Nicotinate ribonucleotide[c0] <=> 1.000000 PRPP[c0] + 1.000000 Niacin[c0]	1.000000 M_cpd00012_c0 + 1.000000 M_cpd00873_c0 <=> 1.000000 M_cpd00103_c0 + 1.000000 M_cpd00218_c0		-0.0009	-0.0009	-0.0009	-0.0009	-0.0009	-0.0009	-0.0009	-0.0009	-0.0009	-0.0009	-0.000120157	-0.000120157
R_rxn01268_c0	Prephenate:NAD+ oxidoreductase(decarboxylating)	1.000000 NAD[c0] + 1.000000 Prephenate[c0] => 1.000000 NADH[c0] + 1.000000 CO2[c0] + 1.000000 p-hydroxyphenylpyruvate[c0]	1.000000 M_cpd00003_c0 + 1.000000 M_cpd00219_c0 => 1.000000 M_cpd00004_c0 + 1.000000 M_cpd00011_c0 + 1.000000 M_cpd00868_c0		0	0.0390432	0	0.0390432	0	0.0390432	0	0.0390432	0	0.0390432	0	0.00521257
R_rxn01269_c0	Prephenate:NADP+ oxidoreductase(decarboxylating)	1.000000 NADP[c0] + 1.000000 Prephenate[c0] => 1.000000 CO2[c0] + 1.000000 NADPH[c0] + 1.000000 p-hydroxyphenylpyruvate[c0]	1.000000 M_cpd00006_c0 + 1.000000 M_cpd00219_c0 => 1.000000 M_cpd00011_c0 + 1.000000 M_cpd00005_c0 + 1.000000 M_cpd00868_c0		0	0.0390432	0	0.0390432	0	0.0390432	0	0.0390432	0	0.0390432	0	0.00521257
R_rxn01270_c0	L-arogenate:2-oxoglutarate aminotransferase	1.000000 Oxaloacetate[c0] + 1.000000 Pretyrosine[c0] <=> 1.000000 L-Aspartate[c0] + 1.000000 Prephenate[c0]	1.000000 M_cpd00032_c0 + 1.000000 M_cpd00616_c0 <=> 1.000000 M_cpd00041_c0 + 1.000000 M_cpd00219_c0		0	0	0	0	0	0	0	0	0	0	0	0
R_rxn01274_c0	(R)-S-Lactoylglutathione hydrolase	1.000000 H2O[c0] + 1.000000 (R)-S-Lactoylglutathione[c0] => 1.000000 H+[c0] + 1.000000 GSH[c0] + 1.000000 D-Lactate[c0]	1.000000 M_cpd00001_c0 + 1.000000 M_cpd02182_c0 => 1.000000 M_cpd00067_c0 + 1.000000 M_cpd00042_c0 + 1.000000 M_cpd00221_c0		0	0	0	0	0	0	0	0	0	0	0	0
R_rxn01275_c0	ATP:D-Gluconate 6-phosphotransferase	1 ATP[c0] + 1 GLCN[c0] <=> 1 ADP[c0] + 1 6-Phospho-D-gluconate[c0]	1 M_cpd00002_c0 + 1 M_cpd00222_c0 <=> 1 M_cpd00008_c0 + 1 M_cpd00284_c0		0	0	0	0	0	0	0	0	0	0	0	0
R_rxn01280_c0	(R)-Glycerate:NAD+ oxidoreductase	1.000000 NAD[c0] + 1.000000 Glycerate[c0] <=> 1.000000 H+[c0] + 1.000000 NADH[c0] + 1.000000 Tartronate semialdehyde[c0]	1.000000 M_cpd00003_c0 + 1.000000 M_cpd00223_c0 <=> 1.000000 M_cpd00067_c0 + 1.000000 M_cpd00004_c0 + 1.000000 M_cpd00843_c0		0	0	0	0	0	0	0	0	0	0	0	0
R_rxn01286_c0	D-Glyceraldehyde:NAD+ oxidoreductase	1.000000 H2O[c0] + 1.000000 NAD[c0] + 1.000000 D-Glyceraldehyde[c0] => 2.000000 H+[c0] + 1.000000 NADH[c0] + 1.000000 Glycerate[c0]	1.000000 M_cpd00001_c0 + 1.000000 M_cpd00003_c0 + 1.000000 M_cpd00448_c0 => 2.000000 M_cpd00067_c0 + 1.000000 M_cpd00004_c0 + 1.000000 M_cpd00223_c0		0.00309489	0.00309489	0.00309489	0.00309489	0.00309489	0.00309489	0.00309489	0.00309489	0.00309489	0.00309489	0.000413193	0.00041319
R_rxn01292_c0	L-Arabinose aldose-ketose-isomerase	1.000000 L-Arabinose[c0] <=> 1.000000 L-Ribulose[c0]	1.000000 M_cpd00224_c0 <=> 1.000000 M_cpd00397_c0		0	0	0	0	0	0	0	0	0	0	0	0
R_rxn01300_c0	ATP:L-homoserine O-phosphotransferase	1.000000 ATP[c0] + 1.000000 L-Homoserine[c0] <=> 1.000000 H+[c0] + 1.000000 ADP[c0] + 1.000000 O-Phospho-L-homoserine[c0]	1.000000 M_cpd00002_c0 + 1.000000 M_cpd00227_c0 <=> 1.000000 M_cpd00067_c0 + 1.000000 M_cpd00008_c0 + 1.000000 M_cpd00809_c0		0	-2.27e-08	0	-2.27e-08	0	-2.27e-08	0	2.69436	0	7.17463	0	7.9e-09
R_rxn01301_c0	L-Homoserine:NAD+ oxidoreductase	1.000000 NAD[c0] + 1.000000 L-Homoserine[c0] <=> 1.000000 H+[c0] + 1.000000 NADH[c0] + 1.000000 L-Aspartate4-semialdehyde[c0]	1.000000 M_cpd00003_c0 + 1.000000 M_cpd00227_c0 <=> 1.000000 M_cpd00067_c0 + 1.000000 M_cpd00004_c0 + 1.000000 M_cpd00346_c0		-0.0362062	-0.0362063	-0.0362062	-0.0362063	-0.0362062	-0.0362063	-2.73057	-0.0362063	-7.21084	-0.0362063	-0.00483383	-0.00483382
R_rxn01303_c0	Acetyl-CoA:L-homoserine O-acetyltransferase	1.000000 Acetyl-CoA[c0] + 1.000000 L-Homoserine[c0] <=> 1.000000 CoA[c0] + 1.000000 O-Acetyl-L-homoserine[c0]	1.000000 M_cpd00022_c0 + 1.000000 M_cpd00227_c0 <=> 1.000000 M_cpd00010_c0 + 1.000000 M_cpd00790_c0		-14.8734	0.0362062	-8.28923	0.0362062	-8.84927	0.0362062	-131.77	0.0362062	-122.766	0.0362062	-10.4648	0.00483381
R_rxn01304_c0	Succinyl-CoA:L-homoserine O-succinyltransferase	1.000000 Succinyl-CoA[c0] + 1.000000 L-Homoserine[c0] => 1.000000 CoA[c0] + 1.000000 O-Succinyl-L-homoserine[c0]	1.000000 M_cpd00078_c0 + 1.000000 M_cpd00227_c0 => 1.000000 M_cpd00010_c0 + 1.000000 M_cpd00822_c0		0	14.9096	0	8.32544	0	8.88547	0	131.806	0	122.802	0	10.4696
R_rxn01307_c0	2-dehydro-3-deoxy-L-pentonate glycolaldehyde-lyase (pyruvate-forming)	1 2-Dehydro-3-deoxy-L-pentonate[c0] <=> 1 Pyruvate[c0] + 1 Glycolaldehyde[c0]	1 M_cpd00520_c0 <=> 1 M_cpd00020_c0 + 1 M_cpd00229_c0		0	0	0	0	0	0	0	0	0	0	0	0
R_rxn01308_c0	L-xylulose 1-phosphate glycolaldehyde-lyase (glycerone-phosphate-forming)	1.000000 L-Xylulose 1-phosphate[c0] <=> 1.000000 Glycolaldehyde[c0] + 1.000000 Glycerone-phosphate[c0]	1.000000 M_cpd03861_c0 <=> 1.000000 M_cpd00229_c0 + 1.000000 M_cpd00095_c0		0	0	0	0	0	0	0	0	0	0	0	0
R_rxn01316_c0	phosphoenolpyruvate:N-acetyl-D-mannosamine C-(1-carboxyvinyl)transferase (phosphate-hydrolysing, 2-carboxy-2-oxoethyl-forming)	1.000000 H2O[c0] + 1.000000 Phosphoenolpyruvate[c0] + 1.000000 N-Acetyl-D-mannosamine[c0] => 1.000000 Phosphate[c0] + 1.000000 Neu5Ac[c0]	1.000000 M_cpd00001_c0 + 1.000000 M_cpd00061_c0 + 1.000000 M_cpd00492_c0 => 1.000000 M_cpd00009_c0 + 1.000000 M_cpd00232_c0		0	0	0	0	0	0	0	0	0	0	0	0
R_rxn01329_c0	D-mannose 6-phosphate 1,6-phosphomutase	1.000000 D-mannose-6-phosphate[c0] <=> 1.000000 D-Mannose1-phosphate[c0]	1.000000 M_cpd00235_c0 <=> 1.000000 M_cpd00485_c0		0	0	0	0	0	0	0	0	0	0	0	0
R_rxn01331_c0	D-erythrose 4-phosphate:NAD+ oxidoreductase	1.000000 H2O[c0] + 1.000000 NAD[c0] + 1.000000 D-Erythrose4-phosphate[c0] => 2.000000 H+[c0] + 1.000000 NADH[c0] + 1.000000 4-Phosphoerythronate[c0]	1.000000 M_cpd00001_c0 + 1.000000 M_cpd00003_c0 + 1.000000 M_cpd00236_c0 => 2.000000 M_cpd00067_c0 + 1.000000 M_cpd00004_c0 + 1.000000 M_cpd02147_c0		0.0009	0.0009	0.0009	0.0009	0.0009	0.0009	0.0009	0.0009	0.0009	0.0009	0.000120157	0.000120157
R_rxn01332_c0	Phosphoenolpyruvate:D-erythrose-4-phosphate C-(1-carboxyvinyl)transferase (phosphate hydrolysing, 2-carboxy-2-oxoethyl-forming)	1.000000 H2O[c0] + 1.000000 Phosphoenolpyruvate[c0] + 1.000000 D-Erythrose4-phosphate[c0] => 1.000000 Phosphate[c0] + 1.000000 DAHP[c0]	1.000000 M_cpd00001_c0 + 1.000000 M_cpd00061_c0 + 1.000000 M_cpd00236_c0 => 1.000000 M_cpd00009_c0 + 1.000000 M_cpd02857_c0		0.12216	0.12216	0.12216	0.12216	0.12216	0.12216	0.12216	0.12216	0.12216	0.235108	0.0163093	0.0163093
R_rxn01334_c0	Sedoheptulose 1,7-bisphosphate D-glyceraldehyde-3-phosphate-lyase	1.000000 Sedoheptulose 1,7-bisphosphate[c0] <=> 1.000000 Glycerone-phosphate[c0] + 1.000000 D-Erythrose4-phosphate[c0]	1.000000 M_cpd00349_c0 <=> 1.000000 M_cpd00095_c0 + 1.000000 M_cpd00236_c0		0.00650312	0.00650308	0.00650311	0.00650309	0.00650311	0.00650309	0.00650311	0.00650309	-3.58081	2.24664	0.000868209	0.000868217
R_rxn01343_c0	ATP:Sedoheptulose 7-phosphate 1-phosphotransferase	1.000000 ATP[c0] + 1.000000 Sedoheptulose7-phosphate[c0] <=> 1.000000 H+[c0] + 1.000000 ADP[c0] + 1.000000 Sedoheptulose 1,7-bisphosphate[c0]	1.000000 M_cpd00002_c0 + 1.000000 M_cpd00238_c0 <=> 1.000000 M_cpd00067_c0 + 1.000000 M_cpd00008_c0 + 1.000000 M_cpd00349_c0		0.00650312	0.00650308	0.00650311	0.00650309	0.00650311	0.00650309	0.00650311	0.00650309	-3.58081	2.24664	0.000868209	0.000868217
R_rxn01353_c0	ATP:dGDP phosphotransferase	1.000000 ATP[c0] + 1.000000 dGDP[c0] <=> 1.000000 ADP[c0] + 1.000000 dGTP[c0]	1.000000 M_cpd00002_c0 + 1.000000 M_cpd00295_c0 <=> 1.000000 M_cpd00008_c0 + 1.000000 M_cpd00241_c0		0	0	0	0	0	0	0	0	0	0	0	0
R_rxn01358_c0	inosine:phosphate alpha-D-ribosyltransferase	1.000000 Phosphate[c0] + 1.000000 Inosine[c0] <=> 1.000000 HYXN[c0] + 1.000000 Ribose 1-phosphate[c0]	1.000000 M_cpd00009_c0 + 1.000000 M_cpd00246_c0 <=> 1.000000 M_cpd00226_c0 + 1.000000 M_cpd00475_c0		0	0	0	0	0	0	0	0	0	0	0	0
R_rxn01361_c0	(S)-dihydroorotate:NAD+ oxidoreductase	1.000000 NAD[c0] + 1.000000 S-Dihydroorotate[c0] => 1.000000 H+[c0] + 1.000000 NADH[c0] + 1.000000 Orotate[c0]	1.000000 M_cpd00003_c0 + 1.000000 M_cpd00282_c0 => 1.000000 M_cpd00067_c0 + 1.000000 M_cpd00004_c0 + 1.000000 M_cpd00247_c0		0.0328979	0.0328978	0.0328979	0.0328978	0.0328979	0.0328978	0.0328979	0.0328978	0.0328979	0.0328978	0.00439212	0.0043921
R_rxn01362_c0	Orotidine-5'-phosphate:diphosphate phospho-alpha-D-ribosyl-transferase	1.000000 PRPP[c0] + 1.000000 Orotate[c0] => 1.000000 PPi[c0] + 1.000000 H+[c0] + 1.000000 Orotidylic acid[c0]	1.000000 M_cpd00103_c0 + 1.000000 M_cpd00247_c0 => 1.000000 M_cpd00012_c0 + 1.000000 M_cpd00067_c0 + 1.000000 M_cpd00810_c0		0.0328979	0.0328978	0.0328979	0.0328978	0.0328979	0.0328978	0.0328979	0.0328978	0.0328979	0.0328978	0.00439212	0.0043921
R_rxn01387_c0	Isocitrate:NADP+ oxidoreductase	1.000000 Isocitrate[c0] + 1.000000 NADP[c0] <=> 1.000000 H+[c0] + 1.000000 Oxalosuccinate[c0] + 1.000000 NADPH[c0]	1.000000 M_cpd00260_c0 + 1.000000 M_cpd00006_c0 <=> 1.000000 M_cpd00067_c0 + 1.000000 M_cpd03187_c0 + 1.000000 M_cpd00005_c0		0	0	0	0	0	0	0	0	0	0	0	0
R_rxn01388_c0	isocitrate hydro-lyase (cis-aconitate-forming)	1.000000 Isocitrate[c0] <=> 1.000000 H2O[c0] + 1.000000 cis-Aconitate[c0]	1.000000 M_cpd00260_c0 <=> 1.000000 M_cpd00001_c0 + 1.000000 M_cpd00331_c0		-0.308261	-0.308261	-0.308261	-0.308261	-0.308261	-0.308261	-0.308261	-0.293861	-4.78853	-0.293861	-0.0411553	-0.0411553
R_rxn01396_c0	ATP:pyridoxine 5'-phosphotransferase	1.000000 ATP[c0] + 1.000000 Pyridoxol[c0] <=> 1.000000 H+[c0] + 1.000000 ADP[c0] + 1.000000 Pyridoxine phosphate[c0]	1.000000 M_cpd00002_c0 + 1.000000 M_cpd00263_c0 <=> 1.000000 M_cpd00067_c0 + 1.000000 M_cpd00008_c0 + 1.000000 M_cpd00478_c0		0	0	0	0	0	0	0	0	0	0	0	0
R_rxn01406_c0	S-adenosylmethioninamine:putrescine 3-aminopropyltransferase	1.000000 Putrescine[c0] + 1.000000 S-Adenosylmethioninamine[c0] => 1.000000 H+[c0] + 1.000000 5-Methylthioadenosine[c0] + 1.000000 Spermidine[c0]	1.000000 M_cpd00118_c0 + 1.000000 M_cpd00837_c0 => 1.000000 M_cpd00067_c0 + 1.000000 M_cpd00147_c0 + 1.000000 M_cpd00264_c0		0.0009	0.0009	0.0009	0.0009	0.0009	0.0009	0.0009	0.0009	0.0009	0.0009	0.000120157	0.000120157
R_rxn01434_c0	L-Citrulline:L-aspartate ligase (AMP-forming)	1.000000 ATP[c0] + 1.000000 L-Aspartate[c0] + 1.000000 Citrulline[c0] <=> 1.000000 PPi[c0] + 2.000000 H+[c0] + 1.000000 AMP[c0] + 1.000000 L-Argininosuccinate[c0]	1.000000 M_cpd00002_c0 + 1.000000 M_cpd00041_c0 + 1.000000 M_cpd00274_c0 <=> 1.000000 M_cpd00012_c0 + 2.000000 M_cpd00067_c0 + 1.000000 M_cpd00018_c0 + 1.000000 M_cpd02152_c0		0.0563338	7.23096	0.0563338	2.7507	0.0563338	2.7507	0.0563338	2.7507	0.0563338	7.23096	0.00752101	0.36724
R_rxn01445_c0	2'-Deoxyguanosine 5'-monophosphate phosphohydrolase	1.000000 H2O[c0] + 1.000000 dGMP[c0] => 1.000000 Phosphate[c0] + 1.000000 Deoxyguanosine[c0]	1.000000 M_cpd00001_c0 + 1.000000 M_cpd00296_c0 => 1.000000 M_cpd00009_c0 + 1.000000 M_cpd00277_c0		0	0	0	0	0	0	0	0	0	0	0	0
R_rxn01451_c0	(S)-3-Hydroxybutanoyl-CoA:NAD+ oxidoreductase	1 NAD[c0] + 1 (S)-3-Hydroxybutyryl-CoA[c0] <=> 1 NADH[c0] + 1 H+[c0] + 1 Acetoacetyl-CoA[c0]	1 M_cpd00003_c0 + 1 M_cpd00842_c0 <=> 1 M_cpd00004_c0 + 1 M_cpd00067_c0 + 1 M_cpd00279_c0		0	0	0	0	0	0	0	0	0	0	0	0
R_rxn01454_c0	acetyl-CoA:acetoacetyl-CoA C-acetyltransferase (thioester-hydrolysing, carboxymethyl-forming)	1.000000 H2O[c0] + 1.000000 Acetyl-CoA[c0] + 1.000000 Acetoacetyl-CoA[c0] => 1.000000 H+[c0] + 1.000000 CoA[c0] + 1.000000 HMG-CoA[c0]	1.000000 M_cpd00001_c0 + 1.000000 M_cpd00022_c0 + 1.000000 M_cpd00279_c0 => 1.000000 M_cpd00067_c0 + 1.000000 M_cpd00010_c0 + 1.000000 M_cpd00292_c0		0	0	0	0	0	0	0	0	0	0	0	0
R_rxn01459_c0	4-Aminobutyraldehyde:NAD+ oxidoreductase	1.000000 H2O[c0] + 1.000000 NADP[c0] + 1.000000 4-Aminobutanal[c0] => 2.000000 H+[c0] + 1.000000 NADPH[c0] + 1.000000 GABA[c0]	1.000000 M_cpd00001_c0 + 1.000000 M_cpd00006_c0 + 1.000000 M_cpd00434_c0 => 2.000000 M_cpd00067_c0 + 1.000000 M_cpd00005_c0 + 1.000000 M_cpd00281_c0		0	0	0	0	0	0	0	0	0	0	0	0
R_rxn01462_c0	4-Guanidinobutanoate amidinohydrolase	1.000000 H2O[c0] + 1.000000 4-Guanidinobutanoate[c0] <=> 1.000000 Urea[c0] + 1.000000 GABA[c0]	1.000000 M_cpd00001_c0 + 1.000000 M_cpd00762_c0 <=> 1.000000 M_cpd00073_c0 + 1.000000 M_cpd00281_c0		0	0	0	0	0	0	0	0	0	0	0	0
R_rxn01465_c0	(S)-dihydroorotate amidohydrolase	1.000000 H2O[c0] + 1.000000 S-Dihydroorotate[c0] <=> 1.000000 H+[c0] + 1.000000 N-Carbamoyl-L-aspartate[c0]	1.000000 M_cpd00001_c0 + 1.000000 M_cpd00282_c0 <=> 1.000000 M_cpd00067_c0 + 1.000000 M_cpd00343_c0		-0.0328978	-0.0328979	-0.0328978	-0.0328979	-0.0328978	-0.0328979	-0.0328978	-0.0328979	-0.0328978	-0.0328979	-0.0043921	-0.00439212
R_rxn01466_c0	Geranyl-diphosphate:isopentenyl-diphosphate geranyltrans-transferase	1.000000 Isopentenyldiphosphate[c0] + 1.000000 Geranyldiphosphate[c0] => 1.000000 PPi[c0] + 1.000000 H+[c0] + 1.000000 Farnesyldiphosphate[c0]	1.000000 M_cpd00113_c0 + 1.000000 M_cpd00283_c0 => 1.000000 M_cpd00012_c0 + 1.000000 M_cpd00067_c0 + 1.000000 M_cpd00350_c0		0.00906943	0.00906942	0.00906943	0.00906942	0.00906943	0.00906942	0.00906943	0.00906942	0.00906943	0.122017	0.00121084	0.00121084
R_rxn01476_c0	6-Phospho-D-glucono-1,5-lactone lactonohydrolase	1.000000 H2O[c0] + 1.000000 6-phospho-D-glucono-1-5-lactone[c0] => 1.000000 H+[c0] + 1.000000 6-Phospho-D-gluconate[c0]	1.000000 M_cpd00001_c0 + 1.000000 M_cpd00911_c0 => 1.000000 M_cpd00067_c0 + 1.000000 M_cpd00284_c0		0	13.9976	0	8.32544	0	8.88547	0	131.806	0	124.27	0	10.4696
R_rxn01477_c0	6-Phospho-D-gluconate hydro-lyase(2-dehydro-3-deoxy-6-phospho-D-gluconate-forming)	1.000000 6-Phospho-D-gluconate[c0] => 1.000000 H2O[c0] + 1.000000 2-Keto-3-deoxy-6-phosphogluconate[c0]	1.000000 M_cpd00284_c0 => 1.000000 M_cpd00001_c0 + 1.000000 M_cpd02711_c0		0	13.9976	0	8.32544	0	8.88547	0	131.806	0	124.27	0	10.4696
R_rxn01479_c0	CTP:ethanolamine-phosphate cytidylyltransferase	1.000000 CTP[c0] + 1.000000 Phosphoethanolamine[c0] <=> 1.000000 PPi[c0] + 1.000000 CDPethanolamine[c0]	1.000000 M_cpd00052_c0 + 1.000000 M_cpd00285_c0 <=> 1.000000 M_cpd00012_c0 + 1.000000 M_cpd00444_c0		0	0	0	0	0	0	0	0	0	0	0	0
R_rxn01485_c0	D-Glucosamine 1-phosphate 1,6-phosphomutase	1.000000 D-Glucosamine1-phosphate[c0] <=> 1.000000 D-Glucosamine phosphate[c0]	1.000000 M_cpd03671_c0 <=> 1.000000 M_cpd00288_c0		-0.0306768	-0.0306768	-0.0306768	-0.0306768	-0.0306768	-0.0306768	-0.0306768	-0.0306768	-0.0306768	-0.0306768	-0.00409559	-0.0040956
R_rxn01486_c0	trans,trans-Farnesyl-diphosphate:isopentenyl-diphosphate farnesyltranstransferase	1.000000 Isopentenyldiphosphate[c0] + 1.000000 Farnesyldiphosphate[c0] => 1.000000 PPi[c0] + 1.000000 H+[c0] + 1.000000 Geranylgeranyl diphosphate[c0]	1.000000 M_cpd00113_c0 + 1.000000 M_cpd00350_c0 => 1.000000 M_cpd00012_c0 + 1.000000 M_cpd00067_c0 + 1.000000 M_cpd00289_c0		0.0018	0.0018	0.0018	0.0018	0.0018	0.0018	0.0018	0.0018	0.0018	0.114748	0.000240314	0.000240314
R_rxn01489_c0	Geranylgeranyl-diphosphate:geranylgeranyl-diphosphate geranylgeranyltransferase	2.000000 Geranylgeranyl diphosphate[c0] => 1.000000 PPi[c0] + 1.000000 H+[c0] + 1.000000 Prephytoene diphosphate[c0]	2.000000 M_cpd00289_c0 => 1.000000 M_cpd00012_c0 + 1.000000 M_cpd00067_c0 + 1.000000 M_cpd02168_c0		0	0	0	0	0	0	0	0	0	0	0	0
R_rxn01507_c0	2'-Deoxyadenosine 5'-monophosphate phosphohydrolase	1.000000 H2O[c0] + 1.000000 dAMP[c0] => 1.000000 Phosphate[c0] + 1.000000 Deoxyadenosine[c0]	1.000000 M_cpd00001_c0 + 1.000000 M_cpd00294_c0 => 1.000000 M_cpd00009_c0 + 1.000000 M_cpd00438_c0		0	0	0	0	0	0	0	0	0	0	0	0
R_rxn01509_c0	ATP:dGMP phosphotransferase	1.000000 H+[c0] + 1.000000 ATP[c0] + 1.000000 dGMP[c0] <=> 1.000000 ADP[c0] + 1.000000 dGDP[c0]	1.000000 M_cpd00067_c0 + 1.000000 M_cpd00002_c0 + 1.000000 M_cpd00296_c0 <=> 1.000000 M_cpd00008_c0 + 1.000000 M_cpd00295_c0		0	0	0	0	0	0	0	0	0	0	0	0
R_rxn01512_c0	ATP:dTDP phosphotransferase	1.000000 ATP[c0] + 1.000000 dTDP[c0] <=> 1.000000 ADP[c0] + 1.000000 TTP[c0]	1.000000 M_cpd00002_c0 + 1.000000 M_cpd00297_c0 <=> 1.000000 M_cpd00008_c0 + 1.000000 M_cpd00357_c0		0.00584647	0.00584646	0.00584647	0.00584646	0.00584647	0.00584646	0.00584647	0.00584646	0.00584647	0.00584646	0.000780549	0.000780545
R_rxn01513_c0	ATP:dTMP phosphotransferase	1.000000 H+[c0] + 1.000000 ATP[c0] + 1.000000 dTMP[c0] <=> 1.000000 ADP[c0] + 1.000000 dTDP[c0]	1.000000 M_cpd00067_c0 + 1.000000 M_cpd00002_c0 + 1.000000 M_cpd00298_c0 <=> 1.000000 M_cpd00008_c0 + 1.000000 M_cpd00297_c0		0.00528871	0.00528871	0.00528871	0.00528871	0.00528871	0.00528871	0.00528871	0.00528871	0.00528871	0.00528871	0.000706084	0.000706082
R_rxn01517_c0	ATP:dUMP phosphotransferase	1.000000 H+[c0] + 1.000000 ATP[c0] + 1.000000 dUMP[c0] <=> 1.000000 ADP[c0] + 1.000000 dUDP[c0]	1.000000 M_cpd00067_c0 + 1.000000 M_cpd00002_c0 + 1.000000 M_cpd00299_c0 <=> 1.000000 M_cpd00008_c0 + 1.000000 M_cpd00978_c0		-0.00528871	-0.00528871	-0.00528871	-0.00528871	-0.00528871	-0.00528871	-0.00528871	-0.00528871	-0.00528871	-0.00528871	-0.000706082	-0.000706084
R_rxn01520_c0	5,10-Methylenetetrahydrofolate:dUMP C-methyltransferase	1.000000 5-10-Methylenetetrahydrofolate[c0] + 1.000000 dUMP[c0] => 1.000000 Dihydrofolate[c0] + 1.000000 dTMP[c0]	1.000000 M_cpd00125_c0 + 1.000000 M_cpd00299_c0 => 1.000000 M_cpd00330_c0 + 1.000000 M_cpd00298_c0		0.00528871	0.00528871	0.00528871	0.00528871	0.00528871	0.00528871	0.00528871	0.00528871	0.00528871	0.00528871	0.000706084	0.000706082
R_rxn01521_c0	2'-Deoxyuridine 5'-monophosphate phosphohydrolase	1.000000 H2O[c0] + 1.000000 dUMP[c0] => 1.000000 Phosphate[c0] + 1.000000 Deoxyuridine[c0]	1.000000 M_cpd00001_c0 + 1.000000 M_cpd00299_c0 => 1.000000 M_cpd00009_c0 + 1.000000 M_cpd00412_c0		0	0	0	0	0	0	0	0	0	0	0	0
R_rxn01530_c0	retinol:NAD+ oxidoreductase	1.000000 NAD[c0] + 1.000000 Retinol[c0] <=> 1.000000 H+[c0] + 1.000000 NADH[c0] + 1.000000 Retinal[c0]	1.000000 M_cpd00003_c0 + 1.000000 M_cpd00365_c0 <=> 1.000000 M_cpd00067_c0 + 1.000000 M_cpd00004_c0 + 1.000000 M_cpd00304_c0		0	0	0	0	0	0	0	0	0	0	0	0
R_rxn01544_c0	XMP:pyrophosphate phosphoribosyltransferase	1.000000 PRPP[c0] + 1.000000 XAN[c0] => 1.000000 PPi[c0] + 1.000000 H+[c0] + 1.000000 XMP[c0]	1.000000 M_cpd00103_c0 + 1.000000 M_cpd00309_c0 => 1.000000 M_cpd00012_c0 + 1.000000 M_cpd00067_c0 + 1.000000 M_cpd00497_c0		0	13.9976	0	8.32544	0	8.88547	0	131.806	0	124.27	0	10.4696
R_rxn01547_c0	Guanosine aminohydrolase	1.000000 H+[c0] + 1.000000 H2O[c0] + 1.000000 Guanosine[c0] <=> 1.000000 NH3[c0] + 1.000000 Xanthosine[c0]	1.000000 M_cpd00067_c0 + 1.000000 M_cpd00001_c0 + 1.000000 M_cpd00311_c0 <=> 1.000000 M_cpd00013_c0 + 1.000000 M_cpd01217_c0		-14.0141	0	-8.34187	0	-8.9019	0	-131.823	0	-124.287	0	-10.4718	0
R_rxn01548_c0	guanosine:phosphate alpha-D-ribosyltransferase	1.000000 Phosphate[c0] + 1.000000 Guanosine[c0] <=> 1.000000 Guanine[c0] + 1.000000 Ribose 1-phosphate[c0]	1.000000 M_cpd00009_c0 + 1.000000 M_cpd00311_c0 <=> 1.000000 M_cpd00207_c0 + 1.000000 M_cpd00475_c0		0	14.0141	0	8.34187	0	8.9019	0	131.823	0	124.287	0	10.4718
R_rxn01550_c0	1H-Imidazole-4-ethanamine:oxygen oxidoreductase (deaminating) (copper-containing)	1 H2O[c0] + 1 O2[c0] + 1 Histamine[c0] => 1 NH3[c0] + 1 H2O2[c0] + 1 Imidazole acetaldehyde[c0]	1 M_cpd00001_c0 + 1 M_cpd00007_c0 + 1 M_cpd00312_c0 => 1 M_cpd00013_c0 + 1 M_cpd00025_c0 + 1 M_cpd03052_c0		0	0	0	0	0	0	0	0	0	0	0	0
R_rxn01561_c0	GDPglucose:D-glucose-6-phosphate 1-alpha-D-glucosyltransferase	1.000000 D-glucose-6-phosphate[c0] + 1.000000 GDP-glucose[c0] <=> 1.000000 GDP[c0] + 1.000000 Trehalose 6-phosphate[c0]	1.000000 M_cpd00079_c0 + 1.000000 M_cpd00315_c0 <=> 1.000000 M_cpd00031_c0 + 1.000000 M_cpd00523_c0		0	0	0	0	0	0	0	0	0	0	0	0
R_rxn01575_c0	L-Isoleucine:2-oxoglutarate aminotransferase	1.000000 2-Oxoglutarate[c0] + 1.000000 L-Isoleucine[c0] <=> 1.000000 L-Glutamate[c0] + 1.000000 3MOP[c0]	1.000000 M_cpd00024_c0 + 1.000000 M_cpd00322_c0 <=> 1.000000 M_cpd00023_c0 + 1.000000 M_cpd00508_c0		-0.075465	-0.075465	-0.075465	-0.075465	-0.075465	-0.075465	-0.075465	-0.075465	-0.075465	-0.075465	-0.0100752	-0.0100752
R_rxn01600_c0	Cyclohexylamine:oxygen oxidoreductase (deaminating)	1.000000 H2O[c0] + 1.000000 O2[c0] + 1.000000 Cyclohexanamine[c0] <=> 1.000000 NH3[c0] + 1.000000 H2O2[c0] + 1.000000 Cyclohexanone[c0]	1.000000 M_cpd00001_c0 + 1.000000 M_cpd00007_c0 + 1.000000 M_cpd00445_c0 <=> 1.000000 M_cpd00013_c0 + 1.000000 M_cpd00025_c0 + 1.000000 M_cpd00329_c0		0	0	0	0	0	0	0	0	0	0	0	0
R_rxn01602_c0	dihydrofolate:NADP+ oxidoreductase	1.000000 NADP[c0] + 1.000000 Dihydrofolate[c0] <=> 1.000000 H+[c0] + 1.000000 NADPH[c0] + 1.000000 Folate[c0]	1.000000 M_cpd00006_c0 + 1.000000 M_cpd00330_c0 <=> 1.000000 M_cpd00067_c0 + 1.000000 M_cpd00005_c0 + 1.000000 M_cpd00393_c0		29.1808	35.1463	29.1808	33.6611	29.1808	33.6611	24.0159	64.651	16.5621	61.8198	3.89587	4.49402
R_rxn01603_c0	7,8-dihydropteroate:L-glutamate ligase (ADP-forming)	1.000000 Dihydropteroate[c0] + 1.000000 ATP[c0] + 1.000000 L-Glutamate[c0] => 1.000000 H+[c0] + 1.000000 ADP[c0] + 1.000000 Phosphate[c0] + 1.000000 Dihydrofolate[c0]	1.000000 M_cpd00683_c0 + 1.000000 M_cpd00002_c0 + 1.000000 M_cpd00023_c0 => 1.000000 M_cpd00067_c0 + 1.000000 M_cpd00008_c0 + 1.000000 M_cpd00009_c0 + 1.000000 M_cpd00330_c0		0.0027	0.0027	0.0027	0.0027	0.0027	0.0027	0.0027	0.0027	0.0027	0.0027	0.000360471	0.00036047
R_rxn01604_c0	Formate:dihydrofolate ligase (ADP-forming)	1.000000 ATP[c0] + 1.000000 Formate[c0] + 1.000000 Dihydrofolate[c0] <=> 1.000000 ADP[c0] + 1.000000 Phosphate[c0] + 1.000000 10-Formyldihydrofolate[c0]	1.000000 M_cpd00002_c0 + 1.000000 M_cpd00047_c0 + 1.000000 M_cpd00330_c0 <=> 1.000000 M_cpd00008_c0 + 1.000000 M_cpd00009_c0 + 1.000000 M_cpd02046_c0		0	0	0	0	0	0	0	0	0	0	0	0
R_rxn01607_c0	ATP:(R)-mevalonate 5-phosphotransferase	1.000000 ATP[c0] + 1.000000 Mevalonic acid[c0] <=> 1.000000 H+[c0] + 1.000000 ADP[c0] + 1.000000 5-phosphomevalonate[c0]	1.000000 M_cpd00002_c0 + 1.000000 M_cpd00332_c0 <=> 1.000000 M_cpd00067_c0 + 1.000000 M_cpd00008_c0 + 1.000000 M_cpd00812_c0		0	0	0	0	0	0	0	0	0	0	0	0
R_rxn01621_c0	L-Rhamnulose-1-phosphate lactaldehyde-lyase	1.000000 L-Rhamnulose 1-phosphate[c0] <=> 1.000000 Glycerone-phosphate[c0] + 1.000000 L-Lactaldehyde[c0]	1.000000 M_cpd00831_c0 <=> 1.000000 M_cpd00095_c0 + 1.000000 M_cpd00334_c0		0	0	0	0	0	0	0	0	0	0	0	0
R_rxn01629_c0	(S)-4-Amino-5-oxopentanoate 4,5-aminomutase	1.0 L-Glutamate1-semialdehyde[c0] => 1.0 5-Aminolevulinate[c0]	1.0 M_cpd02345_c0 => 1.0 M_cpd00338_c0		0.0144	0.0144	0.0144	0.0144	0.0144	0.0144	0	0.0144	0	0.0144	0.0019225	0.00192251
R_rxn01633_c0	2-Dehydro-3-deoxy-L-arabinonate hydro-lyase	1.000000 2-Dehydro-3-deoxy-L-pentonate[c0] => 1.000000 H2O[c0] + 1.000000 2,5-Dioxopentanoate[c0]	1.000000 M_cpd00520_c0 => 1.000000 M_cpd00001_c0 + 1.000000 M_cpd00340_c0		0	0	0	0	0	0	0	0	0	0	0	0
R_rxn01634_c0	5-Dehydro-4-deoxy-D-glucarate hydro-lyase (decarboxylating)	1.000000 H+[c0] + 1.000000 5-Dehydro-4-deoxy-D-glucarate[c0] => 1.000000 H2O[c0] + 1.000000 CO2[c0] + 1.000000 2,5-Dioxopentanoate[c0]	1.000000 M_cpd00067_c0 + 1.000000 M_cpd00515_c0 => 1.000000 M_cpd00001_c0 + 1.000000 M_cpd00011_c0 + 1.000000 M_cpd00340_c0		0	0	0	0	0	0	0	0	0	0	0	0
R_rxn01635_c0	1-Pyrroline-4-hydroxy-2-carboxylate aminohydrolase (decyclizing)	1.000000 NH3[c0] + 1.000000 2,5-Dioxopentanoate[c0] => 1.000000 H+[c0] + 1.000000 H2O[c0] + 1.000000 1-Pyrroline-4-hydroxy-2-carboxylate[c0]	1.000000 M_cpd00013_c0 + 1.000000 M_cpd00340_c0 => 1.000000 M_cpd00067_c0 + 1.000000 M_cpd00001_c0 + 1.000000 M_cpd02626_c0		0	0	0	0	0	0	0	0	0	0	0	0
R_rxn01636_c0	N2-Acetyl-L-ornithine:L-glutamate N-acetyltransferase	1.000000 L-Glutamate[c0] + 1.000000 N-Acetylornithine[c0] <=> 1.000000 N-Acetyl-L-glutamate[c0] + 1.000000 Ornithine[c0]	1.000000 M_cpd00023_c0 + 1.000000 M_cpd00342_c0 <=> 1.000000 M_cpd00477_c0 + 1.000000 M_cpd00064_c0		0.0581338	7.23276	0.0581338	2.7525	0.0581338	2.7525	0.0581338	2.7525	0.0581338	7.23276	0.00776132	0.36748
R_rxn01637_c0	N2-Acetyl-L-ornithine:2-oxoglutarate aminotransferase	1.000000 2-Oxoglutarate[c0] + 1.000000 N-Acetylornithine[c0] <=> 1.000000 L-Glutamate[c0] + 1.000000 2-Acetamido-5-oxopentanoate[c0]	1.000000 M_cpd00024_c0 + 1.000000 M_cpd00342_c0 <=> 1.000000 M_cpd00023_c0 + 1.000000 M_cpd00918_c0		-7.23276	-0.0581338	-2.7525	-0.0581338	-2.7525	-0.0581338	-2.7525	-0.0581338	-7.23276	-0.0581338	-0.36748	-0.00776132
R_rxn01639_c0	N-Formimino-L-glutamate formiminohydrolase	1.000000 L-Glutamate[c0] + 1.000000 Formamide[c0] => 1.000000 H2O[c0] + 1.000000 N-Formimino-L-glutamate[c0]	1.000000 M_cpd00023_c0 + 1.000000 M_cpd00378_c0 => 1.000000 M_cpd00001_c0 + 1.000000 M_cpd00344_c0		0	0	0	0	0	0	0	0	0	0	0	0
R_rxn01641_c0	5-Formiminotetrahydrofolate:L-glutamate N-formiminotransferase	1.000000 L-Glutamate[c0] + 1.000000 5-Formiminotetrahydrofolate[c0] <=> 1.000000 Tetrahydrofolate[c0] + 1.000000 N-Formimino-L-glutamate[c0]	1.000000 M_cpd00023_c0 + 1.000000 M_cpd00502_c0 <=> 1.000000 M_cpd00087_c0 + 1.000000 M_cpd00344_c0		0	0	0	0	0	0	0	0	0	0	0	0
R_rxn01642_c0	4-imidazolone-5-propanoate amidohydrolase	1.000000 H+[c0] + 1.000000 H2O[c0] + 1.000000 4-Imidazolone-5-propanoate[c0] => 1.000000 N-Formimino-L-glutamate[c0]	1.000000 M_cpd00067_c0 + 1.000000 M_cpd00001_c0 + 1.000000 M_cpd02311_c0 => 1.000000 M_cpd00344_c0		0	0	0	0	0	0	0	0	0	0	0	0
R_rxn01643_c0	L-Aspartate-4-semialdehyde:NADP+ oxidoreductase (phosphorylating)	1.000000 H+[c0] + 1.000000 NADPH[c0] + 1.000000 4-Phospho-L-aspartate[c0] => 1.000000 Phosphate[c0] + 1.000000 NADP[c0] + 1.000000 L-Aspartate4-semialdehyde[c0]	1.000000 M_cpd00067_c0 + 1.000000 M_cpd00005_c0 + 1.000000 M_cpd01977_c0 => 1.000000 M_cpd00009_c0 + 1.000000 M_cpd00006_c0 + 1.000000 M_cpd00346_c0		0.120707	0.120707	0.120707	0.120707	0.120707	0.120707	0.120707	2.81507	0.120707	7.29534	0.0161153	0.0161153
R_rxn01653_c0	5-Formyltetrahydrofolate cyclo-ligase (ADP-forming)	1.000000 ATP[c0] + 1.000000 5-Formyltetrahydrofolate[c0] => 1.000000 ADP[c0] + 1.000000 Phosphate[c0] + 1.000000 5-10-Methenyltetrahydrofolate[c0]	1.000000 M_cpd00002_c0 + 1.000000 M_cpd02197_c0 => 1.000000 M_cpd00008_c0 + 1.000000 M_cpd00009_c0 + 1.000000 M_cpd00347_c0		0	0	0	0	0	0	0	0	0	0	0	0
R_rxn01654_c0	5-Formiminotetrahydrofolate ammonia-lyase (cyclizing)	1.000000 NH3[c0] + 1.000000 5-10-Methenyltetrahydrofolate[c0] => 2.000000 H+[c0] + 1.000000 5-Formiminotetrahydrofolate[c0]	1.000000 M_cpd00013_c0 + 1.000000 M_cpd00347_c0 => 2.000000 M_cpd00067_c0 + 1.000000 M_cpd00502_c0		0	0	0	0	0	0	0	0	0	0	0	0
R_rxn01670_c0	Nicotinamide ribonucleotide phosphohydrolase	1.000000 H2O[c0] + 1.000000 Nicotinamide ribonucleotide[c0] => 1.000000 Phosphate[c0] + 1.000000 N-Ribosylnicotinamide[c0]	1.000000 M_cpd00001_c0 + 1.000000 M_cpd00355_c0 => 1.000000 M_cpd00009_c0 + 1.000000 M_cpd02016_c0		0	27.9953	0	16.6509	0	17.7709	0	263.613	0	240.308	0	20.9393
R_rxn01671_c0	ATP:N-ribosylnicotinamide 5'-phosphotransferase	1.000000 ATP[c0] + 1.000000 N-Ribosylnicotinamide[c0] <=> 1.000000 H+[c0] + 1.000000 ADP[c0] + 1.000000 Nicotinamide ribonucleotide[c0]	1.000000 M_cpd00002_c0 + 1.000000 M_cpd02016_c0 <=> 1.000000 M_cpd00067_c0 + 1.000000 M_cpd00008_c0 + 1.000000 M_cpd00355_c0		0	27.9953	0	16.6509	0	17.7709	0	263.613	0	240.308	0	20.9393
R_rxn01672_c0	dCTP aminohydrolase	1.000000 H+[c0] + 1.000000 H2O[c0] + 1.000000 dCTP[c0] => 1.000000 NH3[c0] + 1.000000 dUTP[c0]	1.000000 M_cpd00067_c0 + 1.000000 M_cpd00001_c0 + 1.000000 M_cpd00356_c0 => 1.000000 M_cpd00013_c0 + 1.000000 M_cpd00358_c0		0	0.00528871	0	0.00528871	0	0.00528871	0	0.00528871	0	0.00528871	0	0.000706082
R_rxn01673_c0	ATP:dCDP phosphotransferase	1.000000 ATP[c0] + 1.000000 dCDP[c0] <=> 1.000000 ADP[c0] + 1.000000 dCTP[c0]	1.000000 M_cpd00002_c0 + 1.000000 M_cpd00533_c0 <=> 1.000000 M_cpd00008_c0 + 1.000000 M_cpd00356_c0		0	0	0	0	0	0	0	0	0	0	0	0
R_rxn01675_c0	dTTP:alpha-D-glucose-1-phosphate thymidylyltransferase	1.000000 Glucose-1-phosphate[c0] + 1.000000 TTP[c0] <=> 1.000000 PPi[c0] + 1.000000 dTDPglucose[c0]	1.000000 M_cpd00089_c0 + 1.000000 M_cpd00357_c0 <=> 1.000000 M_cpd00012_c0 + 1.000000 M_cpd00626_c0		0.000557761	0.000557759	0.000557761	0.000557759	0.000557761	0.000557759	0.000557761	0.000557759	0.000557761	0.000557759	7.44654e-05	7.4463e-05
R_rxn01678_c0	ATP:dUDP phosphotransferase	1.000000 ATP[c0] + 1.000000 dUDP[c0] <=> 1.000000 ADP[c0] + 1.000000 dUTP[c0]	1.000000 M_cpd00002_c0 + 1.000000 M_cpd00978_c0 <=> 1.000000 M_cpd00008_c0 + 1.000000 M_cpd00358_c0		-0.00528871	0	-0.00528871	0	-0.00528871	0	-0.00528871	0	-0.00528871	0	-0.000706082	0
R_rxn01682_c0	(1S,2R)-1-C-(indol-3-yl)glycerol 3-phosphate D-glyceraldehyde-3-phosphate-lyase	1.000000 Indoleglycerol phosphate[c0] <=> 1.000000 Glyceraldehyde3-phosphate[c0] + 1.000000 indol[c0]	1.000000 M_cpd02210_c0 <=> 1.000000 M_cpd00102_c0 + 1.000000 M_cpd00359_c0		0	0.0200794	0	0.0200794	0	0.0200794	0	0.0200794	0	0.0200794	0	0.00268075
R_rxn01717_c0	S-Adenosyl-L-methionine:tyramine N-methyltransferase	1.000000 S-Adenosyl-L-methionine[c0] + 1.000000 Tyramine[c0] <=> 1.000000 H+[c0] + 1.000000 S-Adenosyl-homocysteine[c0] + 1.000000 N-Methyltyramine[c0]	1.000000 M_cpd00017_c0 + 1.000000 M_cpd00374_c0 <=> 1.000000 M_cpd00067_c0 + 1.000000 M_cpd00019_c0 + 1.000000 M_cpd01610_c0		0	0	0	0	0	0	0	0	0	0	0	0
R_rxn01739_c0	ATP:shikimate 3-phosphotransferase	1.000000 ATP[c0] + 1.000000 Shikimate[c0] <=> 1.000000 H+[c0] + 1.000000 ADP[c0] + 1.000000 3-phosphoshikimate[c0]	1.000000 M_cpd00002_c0 + 1.000000 M_cpd00383_c0 <=> 1.000000 M_cpd00067_c0 + 1.000000 M_cpd00008_c0 + 1.000000 M_cpd02030_c0		0.12216	0.12216	0.12216	0.12216	0.12216	0.12216	0.12216	0.12216	0.12216	0.235108	0.0163093	0.0163093
R_rxn01740_c0	Shikimate:NADP+ 3-oxidoreductase	1.000000 NADP[c0] + 1.000000 Shikimate[c0] <=> 1.000000 H+[c0] + 1.000000 NADPH[c0] + 1.000000 3-Dehydroshikimate[c0]	1.000000 M_cpd00006_c0 + 1.000000 M_cpd00383_c0 <=> 1.000000 M_cpd00067_c0 + 1.000000 M_cpd00005_c0 + 1.000000 M_cpd01716_c0		-0.12216	-0.12216	-0.12216	-0.12216	-0.12216	-0.12216	-0.12216	-0.12216	-0.235108	-0.12216	-0.0163093	-0.0163093
R_rxn01754_c0	ATP:erythritol 4-phosphotransferase	1.000000 ATP[c0] + 1.000000 Phycite[c0] <=> 1.000000 ADP[c0] + 1.000000 D-Erythritol 4-phosphate[c0]	1.000000 M_cpd00002_c0 + 1.000000 M_cpd00392_c0 <=> 1.000000 M_cpd00008_c0 + 1.000000 M_cpd02203_c0		0	0	0	0	0	0	0	0	0	0	0	0
R_rxn01763_c0	ATP:L-ribulose 5-phosphotransferase	1 ATP[c0] + 1 L-Ribulose[c0] <=> 1 ADP[c0] + 1 L-ribulose-5-phosphate[c0]	1 M_cpd00002_c0 + 1 M_cpd00397_c0 <=> 1 M_cpd00008_c0 + 1 M_cpd00808_c0		0	0	0	0	0	0	0	0	0	0	0	0
R_rxn01790_c0	(R)-Pantoate:NADP+ 2-oxidoreductase	1.000000 NADP[c0] + 1.000000 Pantoate[c0] <=> 1.000000 H+[c0] + 1.000000 NADPH[c0] + 1.000000 2-Dehydropantoate[c0]	1.000000 M_cpd00006_c0 + 1.000000 M_cpd00408_c0 <=> 1.000000 M_cpd00067_c0 + 1.000000 M_cpd00005_c0 + 1.000000 M_cpd00712_c0		-2e-10	0	-2e-10	0	-2e-10	0	-2e-10	0	-2e-10	0	2e-10	0
R_rxn01791_c0	(R)-Pantoate:beta-alanine ligase (AMP-forming)	1.000000 ATP[c0] + 1.000000 beta-Alanine[c0] + 1.000000 Pantoate[c0] => 1.000000 PPi[c0] + 2.000000 H+[c0] + 1.000000 AMP[c0] + 1.000000 PAN[c0]	1.000000 M_cpd00002_c0 + 1.000000 M_cpd00085_c0 + 1.000000 M_cpd00408_c0 => 1.000000 M_cpd00012_c0 + 2.000000 M_cpd00067_c0 + 1.000000 M_cpd00018_c0 + 1.000000 M_cpd00644_c0		0	2e-10	0	2e-10	0	2e-10	0	2e-10	0	2e-10	0	-2e-10
R_rxn01807_c0	ATP:pyridoxal 5'-phosphotransferase	1.000000 ATP[c0] + 1.000000 PM[c0] <=> 1.000000 H+[c0] + 1.000000 ADP[c0] + 1.000000 Pyridoxamine phosphate[c0]	1.000000 M_cpd00002_c0 + 1.000000 M_cpd00419_c0 <=> 1.000000 M_cpd00067_c0 + 1.000000 M_cpd00008_c0 + 1.000000 M_cpd00493_c0		0	0	0	0	0	0	0	0	0	0	0	0
R_rxn01834_c0	(R)-S-Lactoylglutathione methylglyoxal-lyase (isomerizing)	1.000000 (R)-S-Lactoylglutathione[c0] <=> 1.000000 GSH[c0] + 1.000000 2-Oxopropanal[c0]	1.000000 M_cpd02182_c0 <=> 1.000000 M_cpd00042_c0 + 1.000000 M_cpd00428_c0		0	0	0	0	0	0	0	0	0	0	0	0
R_rxn01851_c0	4-aminobutanal:NAD+ 1-oxidoreductase	1.000000 H2O[c0] + 1.000000 NAD[c0] + 1.000000 4-Aminobutanal[c0] => 2.000000 H+[c0] + 1.000000 NADH[c0] + 1.000000 GABA[c0]	1.000000 M_cpd00001_c0 + 1.000000 M_cpd00003_c0 + 1.000000 M_cpd00434_c0 => 2.000000 M_cpd00067_c0 + 1.000000 M_cpd00004_c0 + 1.000000 M_cpd00281_c0		0	0	0	0	0	0	0	0	0	0	0	0
R_rxn01870_c0	D-Fructose 1-phosphate D-glyceraldehyde-3-phosphate-lyase	1.000000 D-fructose-1-phosphate[c0] <=> 1.000000 Glycerone-phosphate[c0] + 1.000000 D-Glyceraldehyde[c0]	1.000000 M_cpd00802_c0 <=> 1.000000 M_cpd00095_c0 + 1.000000 M_cpd00448_c0		0	0	0	0	0	0	0	0	0	0	0	0
R_rxn01871_c0	acetyl-CoA:enzyme N6-(dihydrolipoyl)lysine S-acetyltransferase	1.000000 Acetyl-CoA[c0] + 1.000000 Dihydrolipoamide[c0] <=> 1.000000 CoA[c0] + 1.000000 S-Acetyldihydrolipoamide[c0]	1.000000 M_cpd00022_c0 + 1.000000 M_cpd00449_c0 <=> 1.000000 M_cpd00010_c0 + 1.000000 M_cpd00836_c0		0.36424	0.36424	0.36424	0.36424	0.36424	0.36424	0.36424	0.36424	-4.11603	0.36424	0.0486289	0.0486288
R_rxn01872_c0	succinyl-CoA:enzyme N6-(dihydrolipoyl)lysine S-succinyltransferase	1.000000 Succinyl-CoA[c0] + 1.000000 Dihydrolipoamide[c0] <=> 1.000000 CoA[c0] + 1.000000 S-Succinyldihydrolipoamide[c0]	1.000000 M_cpd00078_c0 + 1.000000 M_cpd00449_c0 <=> 1.000000 M_cpd00010_c0 + 1.000000 M_cpd00860_c0		4.55e-08	0	1.76e-08	0	1.76e-08	0	1.76e-08	0	-4.48027	0	-5.9e-09	0
R_rxn01895_c0	2-Hydroxy-6-oxonona-2,4-diene-1,9-dioate succinylhydrolase	1.000000 H2O[c0] + 1.000000 2-Hydroxy-6-oxonona-2,4-diene-1,9-dioate[c0] => 1.000000 H+[c0] + 1.000000 Oxopent-4-enoate[c0] + 1.000000 Succinate[c0]	1.000000 M_cpd00001_c0 + 1.000000 M_cpd02731_c0 => 1.000000 M_cpd00067_c0 + 1.000000 M_cpd00461_c0 + 1.000000 M_cpd00036_c0		0	0	0	0	0	0	0	0	0	0	0	0
R_rxn01917_c0	ATP:N-acetyl-L-glutamate 5-phosphotransferase	1.000000 ATP[c0] + 1.000000 N-Acetyl-L-glutamate[c0] <=> 1.000000 ADP[c0] + 1.000000 n-acetylglutamyl-phosphate[c0]	1.000000 M_cpd00002_c0 + 1.000000 M_cpd00477_c0 <=> 1.000000 M_cpd00008_c0 + 1.000000 M_cpd02552_c0		0.0581338	7.23276	0.0581338	2.7525	0.0581338	2.7525	0.0581338	2.7525	0.0581338	7.23276	0.00776132	0.36748
R_rxn01961_c0	Xanthosine 5'-phosphate phosphohydrolase	1.000000 H2O[c0] + 1.000000 XMP[c0] => 1.000000 Phosphate[c0] + 1.000000 Xanthosine[c0]	1.000000 M_cpd00001_c0 + 1.000000 M_cpd00497_c0 => 1.000000 M_cpd00009_c0 + 1.000000 M_cpd01217_c0		0	14.0141	0	8.34187	0	8.9019	0	131.823	0	124.287	0	10.4718
R_rxn01964_c0	L-serine hydro-lyase [adding 1-C-(indol-3-yl)glycerol 3-phosphate; L-tryptophan and glyceraldehyde-3-phosphate-forming]	1.000000 L-Serine[c0] + 1.000000 Indoleglycerol phosphate[c0] => 1.000000 H2O[c0] + 1.000000 Glyceraldehyde3-phosphate[c0] + 1.000000 L-Tryptophan[c0]	1.000000 M_cpd00054_c0 + 1.000000 M_cpd02210_c0 => 1.000000 M_cpd00001_c0 + 1.000000 M_cpd00102_c0 + 1.000000 M_cpd00065_c0		0	0.0200794	0	0.0200794	0	0.0200794	0	0.0200794	0	0.0200794	0	0.00268075
R_rxn01973_c0	N-Succinyl-LL-2,6-diaminoheptanedioate amidohydrolase	1.000000 H2O[c0] + 1.000000 N-Succinyl-L-2,6-diaminopimelate[c0] <=> 1.000000 LL-2,6-Diaminopimelate[c0] + 1.000000 Succinate[c0]	1.000000 M_cpd00001_c0 + 1.000000 M_cpd02698_c0 <=> 1.000000 M_cpd00504_c0 + 1.000000 M_cpd00036_c0		0.0845008	0.0845007	0.0845008	0.0845007	0.0845008	0.0845007	0.0845008	0.0845007	0.0845008	0.0845007	0.0112815	0.0112815
R_rxn01974_c0	LL-2,6-Diaminoheptanedioate 2-epimerase	1.000000 LL-2,6-Diaminopimelate[c0] <=> 1.000000 meso-2,6-Diaminopimelate[c0]	1.000000 M_cpd00504_c0 <=> 1.000000 M_cpd00516_c0		0.0845008	0.0845007	0.0845008	0.0845007	0.0845008	0.0845007	0.0845008	0.0845007	0.0845008	0.0845007	0.0112815	0.0112815
R_rxn01977_c0	alpha-D-Glucose 6-phosphate ketol-isomerase	1.000000 D-glucose-6-phosphate[c0] <=> 1.000000 beta-D-Glucose 6-phosphate[c0]	1.000000 M_cpd00079_c0 <=> 1.000000 M_cpd00863_c0		0	0	0	0	0	0	0	0	0	0	0	0
R_rxn01986_c0	2-deoxy-D-ribose 1-phosphate 1,5-phosphomutase	1.000000 deoxyribose-1-phosphate[c0] <=> 1.000000 deoxyribose-5-phosphate[c0]	1.000000 M_cpd00509_c0 <=> 1.000000 M_cpd00510_c0		0	0	0	0	0	0	0	0	0	0	0	0
R_rxn01997_c0	dTDPglucose 4,6-hydro-lyase	1.000000 dTDPglucose[c0] => 1.000000 H2O[c0] + 1.000000 dTDP-4-oxo-6-deoxy-D-glucose[c0]	1.000000 M_cpd00626_c0 => 1.000000 M_cpd00001_c0 + 1.000000 M_cpd00521_c0		0.000557761	0.000557759	0.000557761	0.000557759	0.000557761	0.000557759	0.000557761	0.000557759	0.000557761	0.000557759	7.44654e-05	7.4463e-05
R_rxn02000_c0	dTDP-4-dehydro-6-deoxy-D-glucose 3,5-epimerase	1.000000 dTDP-4-oxo-6-deoxy-D-glucose[c0] <=> 1.000000 dTDP-4-oxo-L-rhamnose[c0]	1.000000 M_cpd00521_c0 <=> 1.000000 M_cpd00522_c0		0.000557761	0.000557759	0.000557761	0.000557759	0.000557761	0.000557759	0.000557761	0.000557759	0.000557761	0.000557759	7.44654e-05	7.4463e-05
R_rxn02003_c0	dTDP-6-deoxy-L-mannose:NADP+ 4-oxidoreductase	1.000000 NADP[c0] + 1.000000 dTDP-rhamnose[c0] <=> 1.000000 H+[c0] + 1.000000 dTDP-4-oxo-L-rhamnose[c0] + 1.000000 NADPH[c0]	1.000000 M_cpd00006_c0 + 1.000000 M_cpd02113_c0 <=> 1.000000 M_cpd00067_c0 + 1.000000 M_cpd00522_c0 + 1.000000 M_cpd00005_c0		-0.000557759	-0.000557761	-0.000557759	-0.000557761	-0.000557759	-0.000557761	-0.000557759	-0.000557761	-0.000557759	-0.000557761	-7.4463e-05	-7.44654e-05
R_rxn02008_c0	UDP-N-acetylmuramoyl-L-alanine:D-glutamate ligase(ADP-forming)	1.000000 ATP[c0] + 1.000000 D-Glutamate[c0] + 1.000000 UDP-N-acetylmuramoyl-L-alanine[c0] => 1.000000 H+[c0] + 1.000000 ADP[c0] + 1.000000 Phosphate[c0] + 1.000000 UDP-N-acetylmuramoyl-L-alanyl-D-glutamate[c0]	1.000000 M_cpd00002_c0 + 1.000000 M_cpd00186_c0 + 1.000000 M_cpd00890_c0 => 1.000000 M_cpd00067_c0 + 1.000000 M_cpd00008_c0 + 1.000000 M_cpd00009_c0 + 1.000000 M_cpd00525_c0		0.0147807	0.0147807	0.0147807	0.0147807	0.0147807	0.0147807	0.0147807	0.0147807	0.0147807	0.0147807	0.00197333	0.00197333
R_rxn02009_c0	UDP-N-acetylmuramoyl-L-alanyl-D-glutamate:L-lysine gamma-ligase (ADP-forming)	1.000000 ATP[c0] + 1.000000 L-Lysine[c0] + 1.000000 UDP-N-acetylmuramoyl-L-alanyl-D-glutamate[c0] <=> 1.000000 H+[c0] + 1.000000 ADP[c0] + 1.000000 Phosphate[c0] + 1.000000 UDP-N-acetylmuramoyl-L-alanyl-D-glutamyl-L-lysine[c0]	1.000000 M_cpd00002_c0 + 1.000000 M_cpd00039_c0 + 1.000000 M_cpd00525_c0 <=> 1.000000 M_cpd00067_c0 + 1.000000 M_cpd00008_c0 + 1.000000 M_cpd00009_c0 + 1.000000 M_cpd02861_c0		0	0	0	0	0	0	0	0	0	0	0	0
R_rxn02011_c0	UDP-N-acetylmuramoyl-L-alanyl-D-glutamate:(L)-meso-2,6-diaminoheptanedioate gamma-ligase (ADP-forming)	1.000000 ATP[c0] + 1.000000 meso-2,6-Diaminopimelate[c0] + 1.000000 UDP-N-acetylmuramoyl-L-alanyl-D-glutamate[c0] => 1.000000 H+[c0] + 1.000000 ADP[c0] + 1.000000 Phosphate[c0] + 1.000000 UDP-N-acetylmuramoyl-L-alanyl-D-gamma-glutamyl-meso-2-6-diaminopimelate[c0]	1.000000 M_cpd00002_c0 + 1.000000 M_cpd00516_c0 + 1.000000 M_cpd00525_c0 => 1.000000 M_cpd00067_c0 + 1.000000 M_cpd00008_c0 + 1.000000 M_cpd00009_c0 + 1.000000 M_cpd02964_c0		0.0147807	0.0147807	0.0147807	0.0147807	0.0147807	0.0147807	0.0147807	0.0147807	0.0147807	0.0147807	0.00197333	0.00197333
R_rxn02015_c0	Taurocholate amidohydrolase	1.000000 H2O[c0] + 1.000000 Taurocholate[c0] <=> 1.000000 Taurine[c0] + 1.000000 Cholate[c0]	1.000000 M_cpd00001_c0 + 1.000000 M_cpd03047_c0 <=> 1.000000 M_cpd00210_c0 + 1.000000 M_cpd00526_c0		0	0	0	0	0	0	0	0	0	0	0	0
R_rxn02026_c0	serine-phosphoethanolamine ethanolaminephosphohydrolase	1.000000 H2O[c0] + 1.000000 Serine phosphoethanolamine[c0] <=> 1.000000 H+[c0] + 1.000000 L-Serine[c0] + 1.000000 Phosphoethanolamine[c0]	1.000000 M_cpd00001_c0 + 1.000000 M_cpd02415_c0 <=> 1.000000 M_cpd00067_c0 + 1.000000 M_cpd00054_c0 + 1.000000 M_cpd00285_c0		0	0	0	0	0	0	0	0	0	0	0	0
R_rxn02045_c0	D-2,6-Diaminohexanoic acid 5,6-aminomutase	1.000000 D-Lysine[c0] <=> 1.000000 2,5-Diaminohexanoate[c0]	1.000000 M_cpd00549_c0 <=> 1.000000 M_cpd03073_c0		0	0	0	0	0	0	0	0	0	0	0	0
R_rxn02056_c0	S-Adenosyl-L-methionine:uroporphyrin-III C-methyltransferase	1.000000 Fe+2[c0] + 1.000000 Sirohydrochlorin[c0] => 2.000000 H+[c0] + 1.000000 Siroheme[c0]	1.000000 M_cpd10515_c0 + 1.000000 M_cpd03426_c0 => 2.000000 M_cpd00067_c0 + 1.000000 M_cpd00557_c0		0.0009	0.0009	0.0009	0.0009	0.0009	0.0009	0.0009	0.0009	0.0009	0.0009	0.000120157	0.000120157
R_rxn02067_c0	(S)-Tetrahydroberberine:oxigen oxidoreductase	1.000000 H+[c0] + 2.000000 O2[c0] + 1.000000 (S)-Canadine[c0] <=> 2.000000 H2O2[c0] + 1.000000 Berberine[c0]	1.000000 M_cpd00067_c0 + 2.000000 M_cpd00007_c0 + 1.000000 M_cpd02117_c0 <=> 2.000000 M_cpd00025_c0 + 1.000000 M_cpd00563_c0		0	0	0	0	0	0	0	0	0	0	0	0
R_rxn02085_c0	4,5-Dihydro-4-oxo-5-imidazolepropanoate hydro-lyase	1 4-Imidazolone-5-propanoate[c0] <=> 1 H2O[c0] + 1 Urocanate[c0]	1 M_cpd02311_c0 <=> 1 M_cpd00001_c0 + 1 M_cpd00581_c0		0	0	0	0	0	0	0	0	0	0	0	0
R_rxn02090_c0	Creatinine iminohydrolase	1.000000 H+[c0] + 1.000000 H2O[c0] + 1.000000 Creatinine[c0] <=> 1.000000 NH3[c0] + 1.000000 N-Methylhydantoin[c0]	1.000000 M_cpd00067_c0 + 1.000000 M_cpd00001_c0 + 1.000000 M_cpd00585_c0 <=> 1.000000 M_cpd00013_c0 + 1.000000 M_cpd01679_c0		0	0	0	0	0	0	0	0	0	0	0	0
R_rxn02107_c0	salicylaldehyde:NAD+ oxidoreductase	1.000000 H2O[c0] + 1.000000 NAD[c0] + 1.000000 Salicylaldehyde[c0] <=> 2.000000 H+[c0] + 1.000000 NADH[c0] + 1.000000 SALC[c0]	1.000000 M_cpd00001_c0 + 1.000000 M_cpd00003_c0 + 1.000000 M_cpd03709_c0 <=> 2.000000 M_cpd00067_c0 + 1.000000 M_cpd00004_c0 + 1.000000 M_cpd00599_c0		0	0	0	0	0	0	0	0	0	0	0	0
R_rxn02115_c0	(R)-Acetoin racemase	1.000000 ACTN[c0] <=> 1.000000 (S)-Acetoin[c0]	1.000000 M_cpd00361_c0 <=> 1.000000 M_cpd01221_c0		0	0	0	0	0	0	0	0	0	0	0	0
R_rxn02131_c0	Sepiapterin aminohydrolase	1.000000 H+[c0] + 1.000000 H2O[c0] + 1.000000 Sepiapterin[c0] <=> 1.000000 NH3[c0] + 1.000000 Xanthopterin-B2[c0]	1.000000 M_cpd00067_c0 + 1.000000 M_cpd00001_c0 + 1.000000 M_cpd00622_c0 <=> 1.000000 M_cpd00013_c0 + 1.000000 M_cpd01558_c0		0	0	0	0	0	0	0	0	0	0	0	0
R_rxn02155_c0	ATP:nicotinamide-nucleotide adenylyltransferase	1.000000 ATP[c0] + 1.000000 Nicotinate ribonucleotide[c0] <=> 1.000000 PPi[c0] + 1.000000 Deamido-NAD[c0]	1.000000 M_cpd00002_c0 + 1.000000 M_cpd00873_c0 <=> 1.000000 M_cpd00012_c0 + 1.000000 M_cpd00638_c0		0	-3e-10	0	-4e-10	0	-4e-10	0	-4e-10	0	-3e-10	0	1e-10
R_rxn02159_c0	L-Histidinol:NAD+ oxidoreductase	1.000000 NAD[c0] + 1.000000 L-Histidinol[c0] <=> 1.000000 H+[c0] + 1.000000 NADH[c0] + 1.000000 L-Histidinal[c0]	1.000000 M_cpd00003_c0 + 1.000000 M_cpd00641_c0 <=> 1.000000 M_cpd00067_c0 + 1.000000 M_cpd00004_c0 + 1.000000 M_cpd01324_c0		0.0245415	0.0245415	0.0245415	0.0245415	0.0245415	0.0245415	0.0245415	0.0245415	0.0245415	0.0245415	0.00327648	0.00327647
R_rxn02160_c0	L-Histidinol-phosphate phosphohydrolase	1.000000 H2O[c0] + 1.000000 L-histidinol-phosphate[c0] => 1.000000 Phosphate[c0] + 1.000000 L-Histidinol[c0]	1.000000 M_cpd00001_c0 + 1.000000 M_cpd00807_c0 => 1.000000 M_cpd00009_c0 + 1.000000 M_cpd00641_c0		0.0245415	0.0245415	0.0245415	0.0245415	0.0245415	0.0245415	0.0245415	0.0245415	0.0245415	0.0245415	0.00327648	0.00327647
R_rxn02166_c0	4-Nitrophenyl phosphate phosphohydrolase	1.000000 H2O[c0] + 1.000000 4-Nitrophenyl phosphate[c0] => 1.000000 Phosphate[c0] + 1.000000 PNP[c0]	1.000000 M_cpd00001_c0 + 1.000000 M_cpd02135_c0 => 1.000000 M_cpd00009_c0 + 1.000000 M_cpd00646_c0		0	0	0	0	0	0	0	0	0	0	0	0
R_rxn02175_c0	ATP:pantetheine-4'-phosphate adenylyltransferase	1.000000 ATP[c0] + 1.000000 Phosphopantetheine[c0] <=> 1.000000 PPi[c0] + 1.000000 Dephospho-CoA[c0]	1.000000 M_cpd00002_c0 + 1.000000 M_cpd00834_c0 <=> 1.000000 M_cpd00012_c0 + 1.000000 M_cpd00655_c0		0	2e-10	0	2e-10	0	2e-10	0	2e-10	0	2e-10	0	-2e-10
R_rxn02177_c0	Isochorismate pyruvate-hydrolase	1.000000 H2O[c0] + 1.000000 Isochorismate[c0] => 1.000000 Pyruvate[c0] + 1.000000 2,3-Dihydroxy-2,3-dihydrobenzoate[c0]	1.000000 M_cpd00001_c0 + 1.000000 M_cpd00658_c0 => 1.000000 M_cpd00020_c0 + 1.000000 M_cpd02566_c0		0	0	0	0	0	0	0	0	0	0	0	0
R_rxn02181_c0	3-Hydroxypropionyl-CoA hydro-lyase	1.000000 3-Hydroxypropanoyl-CoA[c0] <=> 1.000000 H2O[c0] + 1.000000 Acrylyl-CoA[c0]	1.000000 M_cpd03375_c0 <=> 1.000000 M_cpd00001_c0 + 1.000000 M_cpd00663_c0		0	0	0	0	0	0	0	0	0	0	0	0
R_rxn02182_c0	beta-alanyl-CoA ammonia-lyase (acryloyl-CoA-forming)	1.000000 beta-Alanyl-CoA[c0] <=> 1.000000 NH3[c0] + 1.000000 Acrylyl-CoA[c0]	1.000000 M_cpd01560_c0 <=> 1.000000 M_cpd00013_c0 + 1.000000 M_cpd00663_c0		0	0	0	0	0	0	0	0	0	0	0	0
R_rxn02185_c0	2-Acetolactate pyruvate-lyase (carboxylating)	1.000000 TPP[c0] + 1.000000 ALCTT[c0] <=> 1.000000 Pyruvate[c0] + 1.000000 2-Hydroxyethyl-ThPP[c0]	1.000000 M_cpd00056_c0 + 1.000000 M_cpd00668_c0 <=> 1.000000 M_cpd00020_c0 + 1.000000 M_cpd03049_c0		-0.265295	-0.265295	-0.265295	-0.265295	-0.265295	-0.265295	-0.265295	-0.265295	-0.265295	-0.265295	-0.0354189	-0.0354189
R_rxn02186_c0	2,3-Dihydroxy-3-methylbutanoate:NADP+ oxidoreductase (isomerizing)	1.000000 H+[c0] + 1.000000 NADPH[c0] + 1.000000 ALCTT[c0] <=> 1.000000 NADP[c0] + 1.000000 2,3-Dihydroxy-isovalerate[c0]	1.000000 M_cpd00067_c0 + 1.000000 M_cpd00005_c0 + 1.000000 M_cpd00668_c0 <=> 1.000000 M_cpd00006_c0 + 1.000000 M_cpd02498_c0		0.265295	0.265295	0.265295	0.265295	0.265295	0.265295	0.265295	0.265295	0.265295	0.265295	0.0354189	0.0354189
R_rxn02200_c0	2-amino-4-hydroxy-6-hydroxymethyl-7,8-dihydropteridine:4-aminobenzoate 2-amino-4-hydroxydihydropteridine-6-methenyltransferase	1.000000 ABEE[c0] + 1.000000 6-hydroxymethyl dihydropterin[c0] <=> 1.000000 Dihydropteroate[c0] + 1.000000 H2O[c0]	1.000000 M_cpd00443_c0 + 1.000000 M_cpd00954_c0 <=> 1.000000 M_cpd00683_c0 + 1.000000 M_cpd00001_c0		-13.9949	0.0027	-8.32274	0.0027	-8.88277	0.0027	-131.804	0.0027	-124.268	0.0027	-10.4693	0.00036047
R_rxn02201_c0	2-amino-4-hydroxy-6-hydroxymethyl-7,8-dihydropteridine-diphosphate:4-aminobenzoate 2-amino-4-hydroxydihydropteridine-6-methenyltransferase	1.000000 ABEE[c0] + 1.000000 2-Amino-4-hydroxy-6-hydroxymethyl-7-8-dihydropteridinediphosphate[c0] => 1.000000 PPi[c0] + 1.000000 H+[c0] + 1.000000 Dihydropteroate[c0]	1.000000 M_cpd00443_c0 + 1.000000 M_cpd02920_c0 => 1.000000 M_cpd00012_c0 + 1.000000 M_cpd00067_c0 + 1.000000 M_cpd00683_c0		0	13.9976	0	8.32544	0	8.88547	0	131.806	0	124.27	0	10.4696
R_rxn02212_c0	2-Dehydro-3-deoxy-D-arabino-heptonate 7-phosphate phosphate-lyase (cyclyzing)	1.000000 DAHP[c0] => 1.000000 Phosphate[c0] + 1.000000 5-Dehydroquinate[c0]	1.000000 M_cpd02857_c0 => 1.000000 M_cpd00009_c0 + 1.000000 M_cpd00699_c0		0.12216	0.12216	0.12216	0.12216	0.12216	0.12216	0.12216	0.12216	0.12216	0.235108	0.0163093	0.0163093
R_rxn02213_c0	3-Dehydroquinate hydro-lyase	1.000000 5-Dehydroquinate[c0] => 1.000000 H2O[c0] + 1.000000 3-Dehydroshikimate[c0]	1.000000 M_cpd00699_c0 => 1.000000 M_cpd00001_c0 + 1.000000 M_cpd01716_c0		0.12216	0.12216	0.12216	0.12216	0.12216	0.12216	0.12216	0.12216	0.12216	0.235108	0.0163093	0.0163093
R_rxn02228_c0	3-Mercaptolactate:NAD+ oxidoreductase	1.000000 NAD[c0] + 1.000000 3-Mercaptolactate[c0] <=> 1.000000 H+[c0] + 1.000000 NADH[c0] + 1.000000 Mercaptopyruvate[c0]	1.000000 M_cpd00003_c0 + 1.000000 M_cpd03455_c0 <=> 1.000000 M_cpd00067_c0 + 1.000000 M_cpd00004_c0 + 1.000000 M_cpd00706_c0		0	0	0	0	0	0	0	0	0	0	0	0
R_rxn02229_c0	3-Mercaptopyruvate:cyanide sulfurtransferase	1.000000 Sulfite[c0] + 1.000000 Mercaptopyruvate[c0] <=> 1.000000 Pyruvate[c0] + 1.000000 H2S2O3[c0]	1.000000 M_cpd00081_c0 + 1.000000 M_cpd00706_c0 <=> 1.000000 M_cpd00020_c0 + 1.000000 M_cpd00268_c0		5.67266	21.4309	6.52133	14.8468	6.52133	15.4068	6.52133	138.328	2.04106	126.763	0.870648	11.3403
R_rxn02230_c0	3-mercaptopyruvate:cyanide sulfurtransferase	1.000000 Mercaptopyruvate[c0] + 1.000000 HCN[c0] <=> 1.000000 H+[c0] + 1.000000 Pyruvate[c0] + 1.000000 Thiocyanate[c0]	1.000000 M_cpd00706_c0 + 1.000000 M_cpd00150_c0 <=> 1.000000 M_cpd00067_c0 + 1.000000 M_cpd00020_c0 + 1.000000 M_cpd01211_c0		0	0	0	0	0	0	0	0	0	0	0	0
R_rxn02264_c0	Hydroxymethylbilane hydro-lyase(cyclizing)	1.000000 Hydroxymethylbilane[c0] <=> 1.000000 H2O[c0] + 1.000000 UroporphyrinogenIII[c0]	1.000000 M_cpd00755_c0 <=> 1.000000 M_cpd00001_c0 + 1.000000 M_cpd00774_c0		0.0018	0.0018	0.0018	0.0018	0.0018	0.0018	0.0018	0.0018	0.0018	0.0018	0.000240314	0.000240314
R_rxn02265_c0	R03166	1 Hydroxymethylbilane[c0] <=> 1 H2O[c0] + 1 UroporphyrinogenI[c0]	1 M_cpd00755_c0 <=> 1 M_cpd00001_c0 + 1 M_cpd03414_c0		0	0	0	0	0	0	0	0	0	0	0	0
R_rxn02269_c0	(S)-3-methyl-2-oxopentanoate:NAD+ 2-oxidoreductase (CoA-methylbutanoylating)	1.000000 CoA[c0] + 1.000000 NAD[c0] + 1.000000 3MOP[c0] => 1.000000 NADH[c0] + 1.000000 CO2[c0] + 1.000000 2-Methylbutyryl-CoA[c0]	1.000000 M_cpd00010_c0 + 1.000000 M_cpd00003_c0 + 1.000000 M_cpd00508_c0 => 1.000000 M_cpd00004_c0 + 1.000000 M_cpd00011_c0 + 1.000000 M_cpd00760_c0		0.0234804	0.0234804	0.0234804	0.0234804	0.0234804	0.0234804	0.0234804	0.0234804	0.0234804	0.0234804	0.00313481	0.00313481
R_rxn02275_c0	4-Guanidinobutanamide amidohydrolase	1 H2O[c0] + 1 4-Guanidinobutanamide[c0] => 1 NH3[c0] + 1 4-Guanidinobutanoate[c0]	1 M_cpd00001_c0 + 1 M_cpd01973_c0 => 1 M_cpd00013_c0 + 1 M_cpd00762_c0		0	0	0	0	0	0	0	0	0	0	0	0
R_rxn02277_c0	7,8-Diaminononanoate:carbon-dioxide cyclo-ligase	1.000000 ATP[c0] + 1.000000 CO2[c0] + 1.000000 7-8-Diaminononanoate[c0] => 3.000000 H+[c0] + 1.000000 ADP[c0] + 1.000000 Phosphate[c0] + 1.000000 Dethiobiotin[c0]	1.000000 M_cpd00002_c0 + 1.000000 M_cpd00011_c0 + 1.000000 M_cpd00764_c0 => 3.000000 M_cpd00067_c0 + 1.000000 M_cpd00008_c0 + 1.000000 M_cpd00009_c0 + 1.000000 M_cpd01311_c0		0	0	0	0	0	0	0	0	0	0	0	0
R_rxn02283_c0	5-Formyltetrahydrofolate:L-glutamate N-formiminotransferase	1.000000 L-Glutamate[c0] + 1.000000 5-Formyltetrahydrofolate[c0] <=> 1.000000 H+[c0] + 1.000000 Tetrahydrofolate[c0] + 1.000000 N-Formyl-L-glutamate[c0]	1.000000 M_cpd00023_c0 + 1.000000 M_cpd02197_c0 <=> 1.000000 M_cpd00067_c0 + 1.000000 M_cpd00087_c0 + 1.000000 M_cpd00770_c0		0	0	0	0	0	0	0	0	0	0	0	0
R_rxn02285_c0	UDP-N-acetylmuramate:NADP+ oxidoreductase	1.000000 NADP[c0] + 1.000000 UDP-MurNAc[c0] <=> 1.000000 H+[c0] + 1.000000 NADPH[c0] + 1.000000 UDP-N-acetylglucosamine enolpyruvate[c0]	1.000000 M_cpd00006_c0 + 1.000000 M_cpd00773_c0 <=> 1.000000 M_cpd00067_c0 + 1.000000 M_cpd00005_c0 + 1.000000 M_cpd02820_c0		-0.0147807	-0.0147807	-0.0147807	-0.0147807	-0.0147807	-0.0147807	-0.0147807	-0.0147807	-0.0147807	-0.0147807	-0.00197333	-0.00197333
R_rxn02286_c0	UDP-N-acetylmuramate:L-alanine ligase (ADP-forming)	1.000000 ATP[c0] + 1.000000 L-Alanine[c0] + 1.000000 UDP-MurNAc[c0] => 1.000000 H+[c0] + 1.000000 ADP[c0] + 1.000000 Phosphate[c0] + 1.000000 UDP-N-acetylmuramoyl-L-alanine[c0]	1.000000 M_cpd00002_c0 + 1.000000 M_cpd00035_c0 + 1.000000 M_cpd00773_c0 => 1.000000 M_cpd00067_c0 + 1.000000 M_cpd00008_c0 + 1.000000 M_cpd00009_c0 + 1.000000 M_cpd00890_c0		0.0147807	0.0147807	0.0147807	0.0147807	0.0147807	0.0147807	0.0147807	0.0147807	0.0147807	0.0147807	0.00197333	0.00197333
R_rxn02288_c0	Uroporphyrinogen-III carboxy-lyase	4.000000 H+[c0] + 1.000000 UroporphyrinogenIII[c0] <=> 4.000000 CO2[c0] + 1.000000 CoproporphyrinogenIII[c0]	4.000000 M_cpd00067_c0 + 1.000000 M_cpd00774_c0 <=> 4.000000 M_cpd00011_c0 + 1.000000 M_cpd02083_c0		0.0009	0.0009	0.0009	0.0009	0.0009	0.0009	0.0009	0.0009	0.0009	0.0009	0.000120157	0.000120157
R_rxn02297_c0	6-Carboxyhexanoyl-CoA:L-alanine C-carboxyhexanoyltransferase (decarboxylating)	1.000000 H+[c0] + 1.000000 L-Alanine[c0] + 1.000000 Pimeloyl-CoA[c0] => 1.000000 CoA[c0] + 1.000000 CO2[c0] + 1.000000 8-Amino-7-oxononanoate[c0]	1.000000 M_cpd00067_c0 + 1.000000 M_cpd00035_c0 + 1.000000 M_cpd00782_c0 => 1.000000 M_cpd00010_c0 + 1.000000 M_cpd00011_c0 + 1.000000 M_cpd00800_c0		0	0	0	0	0	0	0	0	0	0	0	0
R_rxn02303_c0	Coproporphyrinogen:oxygen oxidoreductase(decarboxylating)	2.000000 H+[c0] + 1.000000 O2[c0] + 1.000000 CoproporphyrinogenIII[c0] <=> 2.000000 H2O[c0] + 2.000000 CO2[c0] + 1.000000 ProtoporphyrinogenIX[c0]	2.000000 M_cpd00067_c0 + 1.000000 M_cpd00007_c0 + 1.000000 M_cpd02083_c0 <=> 2.000000 M_cpd00001_c0 + 2.000000 M_cpd00011_c0 + 1.000000 M_cpd00791_c0		0.0009	0.0009	0.0009	0.0009	0.0009	0.0009	0.0009	0.0009	0.0009	0.0009	0.000120157	0.000120157
R_rxn02304_c0	protoporphyrinogen-IX:oxygen oxidoreductase	3.000000 O2[c0] + 2.000000 ProtoporphyrinogenIX[c0] => 6.000000 H2O[c0] + 2.000000 Protoporphyrin[c0]	3.000000 M_cpd00007_c0 + 2.000000 M_cpd00791_c0 => 6.000000 M_cpd00001_c0 + 2.000000 M_cpd01476_c0		0.00045	0.00045	0.00045	0.00045	0.00045	0.00045	0.00045	0.00045	0.00045	0.00045	6.00785e-05	6.00784e-05
R_rxn02305_c0	2-methyl-4-amino-5-hydroxymethylpyrimidine-diphosphate:4-methyl-5-(2-phosphoethyl)-thiazole 2-methyl-4-aminopyridine-5-methenyltransferase	1.000000 4-Methyl-5--2-phosphoethyl-thiazole[c0] + 1.000000 4-Amino-2-methyl-5-diphosphomethylpyrimidine[c0] <=> 1.000000 PPi[c0] + 1.000000 Thiamine phosphate[c0]	1.000000 M_cpd02654_c0 + 1.000000 M_cpd02894_c0 <=> 1.000000 M_cpd00012_c0 + 1.000000 M_cpd00793_c0		0	0	0	0	0	0	0	0	0	0	0	0
R_rxn02312_c0	S-Adenosyl-L-methionine:8-amino-7-oxononanoate aminotransferase	1.000000 S-Adenosyl-L-methionine[c0] + 1.000000 8-Amino-7-oxononanoate[c0] <=> 1.000000 7-8-Diaminononanoate[c0] + 1.000000 S-Adenosyl-4-methylthio-2-oxobutanoate[c0]	1.000000 M_cpd00017_c0 + 1.000000 M_cpd00800_c0 <=> 1.000000 M_cpd00764_c0 + 1.000000 M_cpd02701_c0		0	0	0	0	0	0	0	0	0	0	0	0
R_rxn02314_c0	ATP:D-tagatose-6-phosphate 1-phosphotransferase	1.000000 ATP[c0] + 1.000000 D-Tagatose 6-phosphate[c0] <=> 1.000000 H+[c0] + 1.000000 ADP[c0] + 1.000000 D-Tagatose 1,6-biphosphate[c0]	1.000000 M_cpd00002_c0 + 1.000000 M_cpd00805_c0 <=> 1.000000 M_cpd00067_c0 + 1.000000 M_cpd00008_c0 + 1.000000 M_cpd02371_c0		0	0	0	0	0	0	0	0	0	0	0	0
R_rxn02320_c0	5-Amino-2-oxopentanoate:2-oxoglutarate aminotransferase	1.000000 2-Oxoglutarate[c0] + 1.000000 L-histidinol-phosphate[c0] <=> 1.000000 L-Glutamate[c0] + 1.000000 imidazole acetol-phosphate[c0]	1.000000 M_cpd00024_c0 + 1.000000 M_cpd00807_c0 <=> 1.000000 M_cpd00023_c0 + 1.000000 M_cpd00930_c0		-0.0245415	-0.0245415	-0.0245415	-0.0245415	-0.0245415	-0.0245415	-0.0245415	-0.0245415	-0.0245415	-0.0245415	-0.00327647	-0.00327648
R_rxn02331_c0	phosphoenolpyruvate:D-arabinose-5-phosphate C-(1-carboxyvinyl)transferase (phosphate-hydrolysing, 2-carboxy-2-oxoethyl-forming)	1.000000 H2O[c0] + 1.000000 Phosphoenolpyruvate[c0] + 1.000000 D-Arabinose5-phosphate[c0] => 1.000000 Phosphate[c0] + 1.000000 3-Deoxy-D-manno-octulosonate8-phosphate[c0]	1.000000 M_cpd00001_c0 + 1.000000 M_cpd00061_c0 + 1.000000 M_cpd00817_c0 => 1.000000 M_cpd00009_c0 + 1.000000 M_cpd02730_c0		0.00167328	0.00167328	0.00167328	0.00167328	0.00167328	0.00167328	0.00167328	0.00167328	0.00167328	0.00167328	0.000223396	0.000223389
R_rxn02334_c0	3',5'-Cyclic-nucleotide 5'-nucleotidohydrolase	1.000000 H2O[c0] + 1.000000 3',5'-Cyclic nucleotide[c0] <=> 1.000000 Nucleoside 5'-phosphate[c0]	1.000000 M_cpd00001_c0 + 1.000000 M_cpd02589_c0 <=> 1.000000 M_cpd00821_c0		0	0	0	0	0	0	0	0	0	0	0	0
R_rxn02339_c0	4-Hydroxy-L-glutamate:2-oxoglutarate aminotransferase	1.000000 2-Oxoglutarate[c0] + 1.000000 4-Hydroxy-L-glutamate[c0] <=> 1.000000 L-Glutamate[c0] + 1.000000 4-Hydroxy-2-oxoglutarate[c0]	1.000000 M_cpd00024_c0 + 1.000000 M_cpd01974_c0 <=> 1.000000 M_cpd00023_c0 + 1.000000 M_cpd00830_c0		0	0	0	0	0	0	0	0	0	0	0	0
R_rxn02341_c0	N-[(R)-4'-Phosphopantothenoyl]-L-cysteine carboxy-lyase	1.000000 H+[c0] + 1.000000 (R)-4'-Phosphopantothenoyl-L-cysteine[c0] => 1.000000 CO2[c0] + 1.000000 Phosphopantetheine[c0]	1.000000 M_cpd00067_c0 + 1.000000 M_cpd02666_c0 => 1.000000 M_cpd00011_c0 + 1.000000 M_cpd00834_c0		0	2e-10	0	2e-10	0	2e-10	0	2e-10	0	2e-10	0	-2e-10
R_rxn02342_c0	R03270	1.000000 Lipoamide[c0] + 1.000000 2-Hydroxyethyl-ThPP[c0] <=> 1.000000 TPP[c0] + 1.000000 S-Acetyldihydrolipoamide[c0]	1.000000 M_cpd00213_c0 + 1.000000 M_cpd03049_c0 <=> 1.000000 M_cpd00056_c0 + 1.000000 M_cpd00836_c0		-0.36424	-0.36424	-0.36424	-0.36424	-0.36424	-0.36424	-0.36424	-0.36424	-0.36424	4.11603	-0.0486288	-0.0486289
R_rxn02362_c0	R03298	1.000000 ATP[c0] + 1.000000 DPG[c0] <=> 1.000000 H+[c0] + 1.000000 ADP[c0] + 1.000000 Phosphate[c0] + 1.000000 cDPG[c0]	1.000000 M_cpd00002_c0 + 1.000000 M_cpd00853_c0 <=> 1.000000 M_cpd00067_c0 + 1.000000 M_cpd00008_c0 + 1.000000 M_cpd00009_c0 + 1.000000 M_cpd03699_c0		0	0	0	0	0	0	0	0	0	0	0	0
R_rxn02373_c0	L-glutamate-5-semialdehyde:NADP+ 5-oxidoreductase (phosphorylating)	1.000000 H+[c0] + 1.000000 L-Glutamyl 5-phosphate[c0] + 1.000000 NADPH[c0] => 1.000000 Phosphate[c0] + 1.000000 NADP[c0] + 1.000000 L-Glutamate5-semialdehyde[c0]	1.000000 M_cpd00067_c0 + 1.000000 M_cpd02097_c0 + 1.000000 M_cpd00005_c0 => 1.000000 M_cpd00009_c0 + 1.000000 M_cpd00006_c0 + 1.000000 M_cpd00858_c0		0	27.9953	0	16.6509	0	17.7709	0	263.613	0	240.308	0	20.9393
R_rxn02376_c0	R03316	1.000000 Lipoamide[c0] + 1.000000 3-Carboxy-1-hydroxypropyl-ThPP[c0] <=> 1.000000 TPP[c0] + 1.000000 S-Succinyldihydrolipoamide[c0]	1.000000 M_cpd00213_c0 + 1.000000 M_cpd03189_c0 <=> 1.000000 M_cpd00056_c0 + 1.000000 M_cpd00860_c0		0	-4.55e-08	0	-1.76e-08	0	-1.76e-08	0	-1.76e-08	0	4.48027	0	5.9e-09
R_rxn02391_c0	Lysolecithin 2,3-acylmutase	1.000000 3-Lysolecithin[c0] <=> 1.000000 2-Lysolecithin[c0]	1.000000 M_cpd02603_c0 <=> 1.000000 M_cpd02601_c0		0	0	0	0	0	0	0	0	0	0	0	0
R_rxn02400_c0	Nicotinate D-ribonucleotide phosphohydrolase	1.000000 H2O[c0] + 1.000000 Nicotinate ribonucleotide[c0] => 1.000000 Phosphate[c0] + 1.000000 Nicotinate D-ribonucleoside[c0]	1.000000 M_cpd00001_c0 + 1.000000 M_cpd00873_c0 => 1.000000 M_cpd00009_c0 + 1.000000 M_cpd03471_c0		0	0	0	0	0	0	0	0	0	0	0	0
R_rxn02402_c0	Nicotinate-nucleotide:pyrophosphate phosphoribosyltransferase (carboxylating)	1.000000 H+[c0] + 1.000000 PRPP[c0] + 1.000000 Quinolinate[c0] => 1.000000 PPi[c0] + 1.000000 CO2[c0] + 1.000000 Nicotinate ribonucleotide[c0]	1.000000 M_cpd00067_c0 + 1.000000 M_cpd00103_c0 + 1.000000 M_cpd02333_c0 => 1.000000 M_cpd00012_c0 + 1.000000 M_cpd00011_c0 + 1.000000 M_cpd00873_c0		0	-3e-10	0	-4e-10	0	-4e-10	0	-4e-10	0	-3e-10	0	1e-10
R_rxn02404_c0	3-Deoxy-D-manno-octulosonate-8-phosphate 8-phosphohydrolase	1.000000 H2O[c0] + 1.000000 3-Deoxy-D-manno-octulosonate8-phosphate[c0] => 1.000000 Phosphate[c0] + 1.000000 KDO[c0]	1.000000 M_cpd00001_c0 + 1.000000 M_cpd02730_c0 => 1.000000 M_cpd00009_c0 + 1.000000 M_cpd00875_c0		0.00167328	0.00167328	0.00167328	0.00167328	0.00167328	0.00167328	0.00167328	0.00167328	0.00167328	0.00167328	0.000223396	0.000223389
R_rxn02405_c0	CTP:3-deoxy-D-manno-octulosonate cytidylyltransferase	1.000000 CTP[c0] + 1.000000 KDO[c0] => 1.000000 PPi[c0] + 1.000000 H+[c0] + 1.000000 CMP-KDO[c0]	1.000000 M_cpd00052_c0 + 1.000000 M_cpd00875_c0 => 1.000000 M_cpd00012_c0 + 1.000000 M_cpd00067_c0 + 1.000000 M_cpd02546_c0		0.00167328	0.00167328	0.00167328	0.00167328	0.00167328	0.00167328	0.00167328	0.00167328	0.00167328	0.00167328	0.000223396	0.000223389
R_rxn02418_c0	myo-inositol-hexakisphosphate 4-phosphohydrolase	1.000000 H2O[c0] + 1.000000 Phytate[c0] <=> 1.000000 H+[c0] + 1.000000 Phosphate[c0] + 1.000000 Inositol 1,2,3,5,6-pentakisphosphate[c0]	1.000000 M_cpd00001_c0 + 1.000000 M_cpd00885_c0 <=> 1.000000 M_cpd00067_c0 + 1.000000 M_cpd00009_c0 + 1.000000 M_cpd02788_c0		0	0	0	0	0	0	0	0	0	0	0	0
R_rxn02421_c0	CTP:N-methylethanolamine-phosphate cytidylyltransferase	1.000000 CTP[c0] + 1.000000 N-Methylethanolamine phosphate[c0] <=> 1.000000 PPi[c0] + 1.000000 CDP-N-methylethanolamine[c0]	1.000000 M_cpd00052_c0 + 1.000000 M_cpd00888_c0 <=> 1.000000 M_cpd00012_c0 + 1.000000 M_cpd02200_c0		0	0	0	0	0	0	0	0	0	0	0	0
R_rxn02431_c0	Formylmethanofuran:5,6,7,8-tetrahydromethanopterin 5-formyltransferase	1.000000 Methanofuran[c0] + 1.000000 5-Formyl-H4MPT[c0] => 1.000000 H+[c0] + 1.000000 Formylmethanofuran[c0] + 1.000000 H4MPT[c0]	1.000000 M_cpd00643_c0 + 1.000000 M_cpd00936_c0 => 1.000000 M_cpd00067_c0 + 1.000000 M_cpd00735_c0 + 1.000000 M_cpd00895_c0		0	-2.27e-08	0	-1.76e-08	0	-1.76e-08	0	-1.76e-08	0	4.48027	0	5.9e-09
R_rxn02460_c0	ATP:1D-myo-inositol-1,4,5-trisphosphate 3-phosphotransferase	1.000000 ATP[c0] + 1.000000 Ins(1,4,5)P3[c0] <=> 1.000000 ADP[c0] + 1.000000 Inositol 1,3,4,5-tetrakisphosphate[c0]	1.000000 M_cpd00002_c0 + 1.000000 M_cpd00916_c0 <=> 1.000000 M_cpd00008_c0 + 1.000000 M_cpd00934_c0		0	0	0	0	0	0	0	0	0	0	0	0
R_rxn02465_c0	N-acetyl-L-glutamate-5-semialdehyde:NADP+ 5-oxidoreductase (phosphrylating)	1.000000 H+[c0] + 1.000000 NADPH[c0] + 1.000000 n-acetylglutamyl-phosphate[c0] => 1.000000 Phosphate[c0] + 1.000000 NADP[c0] + 1.000000 2-Acetamido-5-oxopentanoate[c0]	1.000000 M_cpd00067_c0 + 1.000000 M_cpd00005_c0 + 1.000000 M_cpd02552_c0 => 1.000000 M_cpd00009_c0 + 1.000000 M_cpd00006_c0 + 1.000000 M_cpd00918_c0		0.0581338	7.23276	0.0581338	2.7525	0.0581338	2.7525	0.0581338	2.7525	0.0581338	7.23276	0.00776132	0.36748
R_rxn02473_c0	D-erythro-1-(Imidazol-4-yl)glycerol 3-phosphate hydro-lyase	1.000000 D-erythro-imidazol-glycerol-phosphate[c0] => 1.000000 H2O[c0] + 1.000000 imidazole acetol-phosphate[c0]	1.000000 M_cpd02843_c0 => 1.000000 M_cpd00001_c0 + 1.000000 M_cpd00930_c0		0.0245415	0.0245415	0.0245415	0.0245415	0.0245415	0.0245415	0.0245415	0.0245415	0.0245415	0.0245415	0.00327648	0.00327647
R_rxn02474_c0	5-amino-6-(5-phosphoribitylamino)uracil:NADP+ 1'-oxidoreductase	1.000000 NADP[c0] + 1.000000 5-Amino-6--5-phosphoribitylaminouracil[c0] <=> 1.000000 H+[c0] + 1.000000 NADPH[c0] + 1.000000 5-Amino-6--5-phosphoribosylaminouracil[c0]	1.000000 M_cpd00006_c0 + 1.000000 M_cpd02720_c0 <=> 1.000000 M_cpd00067_c0 + 1.000000 M_cpd00005_c0 + 1.000000 M_cpd00931_c0		-6.13699e-05	-6.13702e-05	-6.13698e-05	-6.13702e-05	-6.13698e-05	-6.13702e-05	-6.13699e-05	-6.13702e-05	-6.13698e-05	-6.13702e-05	-8.1928e-06	-8.1934e-06
R_rxn02475_c0	2,5-Diamino-6-hydroxy-4-(5-phosphoribosylamino)-pyrimidine 2-aminohydrolase	1.000000 H+[c0] + 1.000000 H2O[c0] + 1.000000 2,5-Diamino-6-(5'-phosphoribosylamino)-4-pyrimidineone[c0] => 1.000000 NH3[c0] + 1.000000 5-Amino-6--5-phosphoribosylaminouracil[c0]	1.000000 M_cpd00067_c0 + 1.000000 M_cpd00001_c0 + 1.000000 M_cpd00957_c0 => 1.000000 M_cpd00013_c0 + 1.000000 M_cpd00931_c0		6.13702e-05	6.13699e-05	6.13702e-05	6.13698e-05	6.13702e-05	6.13698e-05	6.13702e-05	6.13699e-05	6.13702e-05	6.13698e-05	8.1934e-06	8.1928e-06
R_rxn02476_c0	Phosphoenolpyruvate:3-phosphoshikimate 5-O-(1-carboxyvinyl)-transferase	1.000000 Phosphoenolpyruvate[c0] + 1.000000 3-phosphoshikimate[c0] <=> 1.000000 Phosphate[c0] + 1.000000 5-O--1-Carboxyvinyl-3-phosphoshikimate[c0]	1.000000 M_cpd00061_c0 + 1.000000 M_cpd02030_c0 <=> 1.000000 M_cpd00009_c0 + 1.000000 M_cpd00932_c0		0.12216	0.12216	0.12216	0.12216	0.12216	0.12216	0.12216	0.12216	0.12216	0.235108	0.0163093	0.0163093
R_rxn02480_c0	5,10-Methenyltetrahydromethanopterin 10-hydrolase (decyclizing)	1.000000 H2O[c0] + 1.000000 5,10-Methenyltetrahydromethanopterin[c0] <=> 1.000000 H+[c0] + 1.000000 5-Formyl-H4MPT[c0]	1.000000 M_cpd00001_c0 + 1.000000 M_cpd02655_c0 <=> 1.000000 M_cpd00067_c0 + 1.000000 M_cpd00936_c0		0	-2.27e-08	0	-1.76e-08	0	-1.76e-08	0	-1.76e-08	0	4.48027	0	5.9e-09
R_rxn02484_c0	ATP:4-amino-5-hydroxymethyl-2-methylpyrimidine 5-phosphotransferase	1.000000 ATP[c0] + 1.000000 Toxopyrimidine[c0] <=> 1.000000 H+[c0] + 1.000000 ADP[c0] + 1.000000 4-Amino-5-phosphomethyl-2-methylpyrimidine[c0]	1.000000 M_cpd00002_c0 + 1.000000 M_cpd00939_c0 <=> 1.000000 M_cpd00067_c0 + 1.000000 M_cpd00008_c0 + 1.000000 M_cpd02775_c0		-0.00269998	-0.0027	-0.00269998	-0.0027	-0.00269998	-0.0027	-0.00269998	-0.0027	-4.48297	-0.0027	-0.000360477	-0.000360471
R_rxn02503_c0	ATP:2-amino-4-hydroxy-6-hydroxymethyl-7,8-dihydropteridine 6'-pyrophosphotransferase	1.000000 ATP[c0] + 1.000000 6-hydroxymethyl dihydropterin[c0] <=> 1.000000 2-Amino-4-hydroxy-6-hydroxymethyl-7-8-dihydropteridinediphosphate[c0] + 1.000000 H+[c0] + 1.000000 AMP[c0]	1.000000 M_cpd00002_c0 + 1.000000 M_cpd00954_c0 <=> 1.000000 M_cpd02920_c0 + 1.000000 M_cpd00067_c0 + 1.000000 M_cpd00018_c0		0	13.9976	0	8.32544	0	8.88547	0	131.806	0	124.27	0	10.4696
R_rxn02504_c0	2-amino-4-hydroxy-6-(D-erythro-1,2,3-trihydroxypropyl)-7,8-dihydropteridine glycolaldehyde-lyase	1.000000 Dihydroneopterin[c0] <=> 1.000000 Glycolaldehyde[c0] + 1.000000 6-hydroxymethyl dihydropterin[c0]	1.000000 M_cpd02961_c0 <=> 1.000000 M_cpd00229_c0 + 1.000000 M_cpd00954_c0		0.0027	0.0027	0.0027	0.0027	0.0027	0.0027	0.0027	0.0027	0.0027	0.0027	0.000360471	0.00036047
R_rxn02507_c0	1-(2-Carboxyphenylamino)-1-deoxy-D-ribulose-5-phosphate carboxy-lyase(cyclizing)	1.000000 H+[c0] + 1.000000 1-(2-carboxyphenylamino)-1-deoxyribulose 5-phosphate[c0] => 1.000000 H2O[c0] + 1.000000 CO2[c0] + 1.000000 Indoleglycerol phosphate[c0]	1.000000 M_cpd00067_c0 + 1.000000 M_cpd00956_c0 => 1.000000 M_cpd00001_c0 + 1.000000 M_cpd00011_c0 + 1.000000 M_cpd02210_c0		0.0200794	0.0200794	0.0200794	0.0200794	0.0200794	0.0200794	0.0200794	0.0200794	0.0200794	0.0200794	0.00268076	0.00268075
R_rxn02508_c0	N-(5-Phospho-beta-D-ribosyl)anthranilate ketol-isomerase	1.000000 N-5-phosphoribosyl-anthranilate[c0] <=> 1.000000 1-(2-carboxyphenylamino)-1-deoxyribulose 5-phosphate[c0]	1.000000 M_cpd02642_c0 <=> 1.000000 M_cpd00956_c0		0.0200794	0.0200794	0.0200794	0.0200794	0.0200794	0.0200794	0.0200794	0.0200794	0.0200794	0.0200794	0.00268076	0.00268075
R_rxn02569_c0	ATP:selenide, water phosphotransferase	1.000000 ATP[c0] + 1.000000 H2O[c0] + 1.000000 Selenide[c0] <=> 2.000000 H+[c0] + 1.000000 Phosphate[c0] + 1.000000 AMP[c0] + 1.000000 Selenophosphate[c0]	1.000000 M_cpd00002_c0 + 1.000000 M_cpd00001_c0 + 1.000000 M_cpd01078_c0 <=> 2.000000 M_cpd00067_c0 + 1.000000 M_cpd00009_c0 + 1.000000 M_cpd00018_c0 + 1.000000 M_cpd03078_c0		0	0	0	0	0	0	0	0	0	0	0	0
R_rxn02576_c0	ATP:viomycin O-phosphotransferase	1.000000 ATP[c0] + 1.000000 Viomycin[c0] <=> 1.000000 H+[c0] + 1.000000 ADP[c0] + 1.000000 O-Phosphoviomycin[c0]	1.000000 M_cpd00002_c0 + 1.000000 M_cpd01085_c0 <=> 1.000000 M_cpd00067_c0 + 1.000000 M_cpd00008_c0 + 1.000000 M_cpd01684_c0		0	0	0	0	0	0	0	0	0	0	0	0
R_rxn02584_c0	N-Methylhexanamide amidohydrolase	1.000000 H2O[c0] + 1.000000 N-Methylhexanamide[c0] <=> 1.000000 Methanamine[c0] + 1.000000 Hexanoate[c0]	1.000000 M_cpd00001_c0 + 1.000000 M_cpd01765_c0 <=> 1.000000 M_cpd00187_c0 + 1.000000 M_cpd01113_c0		0	0	0	0	0	0	0	0	0	0	0	0
R_rxn02642_c0	(S)-Tetrahydrocolumbamine:oxigen oxidoreductase	1.000000 H+[c0] + 2.000000 O2[c0] + 1.000000 Isocorypalmine[c0] <=> 2.000000 H2O2[c0] + 1.000000 Columbamine[c0]	1.000000 M_cpd00067_c0 + 2.000000 M_cpd00007_c0 + 1.000000 M_cpd02545_c0 <=> 2.000000 M_cpd00025_c0 + 1.000000 M_cpd01238_c0		0	0	0	0	0	0	0	0	0	0	0	0
R_rxn02687_c0	R03790	1.000000 NAD[c0] + 1.000000 (R)-Mandelate[c0] <=> 1.000000 H+[c0] + 1.000000 NADH[c0] + 1.000000 Benzoylformate[c0]	1.000000 M_cpd00003_c0 + 1.000000 M_cpd01357_c0 <=> 1.000000 M_cpd00067_c0 + 1.000000 M_cpd00004_c0 + 1.000000 M_cpd01447_c0		0	0	0	0	0	0	0	0	0	0	0	0
R_rxn02693_c0	Dimethylallyl-diphosphate:aspulvinone-E dimethylallyltransferase	2.000000 DMAPP[c0] + 1.000000 Aspulvinone E[c0] <=> 2.000000 PPi[c0] + 2.000000 H+[c0] + 1.000000 Aspulvinone H[c0]	2.000000 M_cpd00202_c0 + 1.000000 M_cpd01371_c0 <=> 2.000000 M_cpd00012_c0 + 2.000000 M_cpd00067_c0 + 1.000000 M_cpd01373_c0		0	0	0	0	0	0	0	0	0	0	0	0
R_rxn02737_c0	UDPglucosamine 4-epimerase	1.000000 UDP-glucosamine[c0] <=> 1.000000 UDP-galactosamine[c0]	1.000000 M_cpd01482_c0 <=> 1.000000 M_cpd01623_c0		0	0	0	0	0	0	0	0	0	0	0	0
R_rxn02749_c0	(R)-2-Methylmalate hydro-lyase	1.0 D-Citramalate[c0] <=> 1.0 Citraconate[c0] + 1.0 H2O[c0]	1.0 M_cpd01700_c0 <=> 1.0 M_cpd01502_c0 + 1.0 M_cpd00001_c0		0.0989454	0.0989454	0.0989454	0.0989454	0.0989454	0.0989454	0.0989454	0.0989454	0.0989454	0.0989454	0.01321	0.01321
R_rxn02751_c0	R03898	1.0 Citraconate[c0] + 1.0 H2O[c0] <=> 1.0 D-erythro-3-Methylmalate[c0]	1.0 M_cpd01502_c0 + 1.0 M_cpd00001_c0 <=> 1.0 M_cpd03593_c0		0.0989454	0.0989454	0.0989454	0.0989454	0.0989454	0.0989454	0.0989454	0.0989454	0.0989454	0.0989454	0.01321	0.01321
R_rxn02774_c0	S-Adenosyl-L-methionine:uroporphyrin-III C-methyltransferase	1.000000 NAD[c0] + 1.000000 Precorrin 2[c0] => 2.000000 H+[c0] + 1.000000 NADH[c0] + 1.000000 Sirohydrochlorin[c0]	1.000000 M_cpd00003_c0 + 1.000000 M_cpd01620_c0 => 2.000000 M_cpd00067_c0 + 1.000000 M_cpd00004_c0 + 1.000000 M_cpd03426_c0		0.0009	0.0009	0.0009	0.0009	0.0009	0.0009	0.0009	0.0009	0.0009	0.0009	0.000120157	0.000120157
R_rxn02775_c0	S-adenosyl-L-methionine:precorrin-4 C20-methyltransferase	1.0 H+[c0] + 1.0 S-Adenosyl-L-methionine[c0] + 1.0 Precorrin 2[c0] => 1.0 S-Adenosyl-homocysteine[c0] + 1.0 Precorrin 3A[c0]	1.0 M_cpd00067_c0 + 1.0 M_cpd00017_c0 + 1.0 M_cpd01620_c0 => 1.0 M_cpd00019_c0 + 1.0 M_cpd03420_c0		0	0	0	0	0	0	0	0	0	0	0	0
R_rxn02788_c0	R03966	1.000000 2-Hydroxymuconate[c0] => 1.000000 4-Oxalocrotonate[c0]	1.000000 M_cpd01644_c0 => 1.000000 M_cpd02183_c0		0	0	0	0	0	0	0	0	0	0	0	0
R_rxn02789_c0	2-Isopropylmalate hydro-lyase	1.000000 2-Isopropylmalate[c0] <=> 1.000000 H2O[c0] + 1.000000 2-Isopropylmaleate[c0]	1.000000 M_cpd01646_c0 <=> 1.000000 M_cpd00001_c0 + 1.000000 M_cpd01710_c0		0.163838	0.163838	0.163838	0.163838	0.163838	0.163838	0.163838	0.163838	0.163838	0.163838	0.0218737	0.0218736
R_rxn02791_c0	(5-Glutamyl)-peptide:amino-acid 5-glutamyltransferase	1.000000 L-Glutamate[c0] + 1.000000 L-3-Cyanoalanine[c0] <=> 1.000000 H2O[c0] + 1.000000 gamma-Glutamyl-beta-cyanoalanine[c0]	1.000000 M_cpd00023_c0 + 1.000000 M_cpd01651_c0 <=> 1.000000 M_cpd00001_c0 + 1.000000 M_cpd03407_c0		0	0	0	0	0	0	0	0	0	0	0	0
R_rxn02792_c0	gamma-glutamyltranspeptidase family protein	1.000000 H+[c0] + 1.000000 L-Glutamate[c0] + 1.000000 L-3-Cyanoalanine[c0] => 1.000000 H2O[c0] + 1.000000 CO2[c0] + 1.000000 gamma-Glutamyl-3-aminopropiononitrile[c0]	1.000000 M_cpd00067_c0 + 1.000000 M_cpd00023_c0 + 1.000000 M_cpd01651_c0 => 1.000000 M_cpd00001_c0 + 1.000000 M_cpd00011_c0 + 1.000000 M_cpd03646_c0		0	0	0	0	0	0	0	0	0	0	0	0
R_rxn02795_c0	Glycochenodeoxycholate amidohydrolase	1.000000 H2O[c0] + 1.000000 Glycochenodeoxycholate[c0] <=> 1.000000 Glycine[c0] + 1.000000 Chenodiol[c0]	1.000000 M_cpd00001_c0 + 1.000000 M_cpd03247_c0 <=> 1.000000 M_cpd00033_c0 + 1.000000 M_cpd01663_c0		0	0	0	0	0	0	0	0	0	0	0	0
R_rxn02796_c0	chenodeoxycholoyltaurine amidohydrolase	1.000000 H2O[c0] + 1.000000 Taurochenodeoxycholate[c0] <=> 1.000000 Taurine[c0] + 1.000000 Chenodiol[c0]	1.000000 M_cpd00001_c0 + 1.000000 M_cpd03246_c0 <=> 1.000000 M_cpd00210_c0 + 1.000000 M_cpd01663_c0		0	0	0	0	0	0	0	0	0	0	0	0
R_rxn02811_c0	3-Isopropylmalate hydro-lyase	1.000000 3-Isopropylmalate[c0] <=> 1.000000 H2O[c0] + 1.000000 2-Isopropylmaleate[c0]	1.000000 M_cpd02693_c0 <=> 1.000000 M_cpd00001_c0 + 1.000000 M_cpd01710_c0		-0.163838	-0.163838	-0.163838	-0.163838	-0.163838	-0.163838	-0.163838	-0.163838	-0.163838	-0.163838	-0.0218736	-0.0218737
R_rxn02819_c0	S-Adenosyl-L-methionine:16-methoxy-2,3-dihydro-3-hydroxytabersonine N-methyltransferase	1.000000 S-Adenosyl-L-methionine[c0] + 1.000000 16-Methoxy-2,3-dihydro-3-hydroxytabersonine[c0] <=> 1.000000 H+[c0] + 1.000000 S-Adenosyl-homocysteine[c0] + 1.000000 Deacetoxyvindoline[c0]	1.000000 M_cpd00017_c0 + 1.000000 M_cpd02787_c0 <=> 1.000000 M_cpd00067_c0 + 1.000000 M_cpd00019_c0 + 1.000000 M_cpd01736_c0		0	0	0	0	0	0	0	0	0	0	0	0
R_rxn02821_c0	Acylneuraminyl hydrolase	1.000000 Neu5Ac[c0] + 1.000000 Cerebroside[c0] <=> 1.000000 H2O[c0] + 1.000000 GM4[c0]	1.000000 M_cpd00232_c0 + 1.000000 M_cpd01743_c0 <=> 1.000000 M_cpd00001_c0 + 1.000000 M_cpd03653_c0		0	0	0	0	0	0	0	0	0	0	0	0
R_rxn02831_c0	O-Succinylbenzoate:CoA ligase (AMP-forming)	1.000000 ATP[c0] + 1.000000 CoA[c0] + 1.000000 Succinylbenzoate[c0] => 1.000000 PPi[c0] + 1.000000 H+[c0] + 1.000000 AMP[c0] + 1.000000 Succinylbenzoyl-CoA[c0]	1.000000 M_cpd00002_c0 + 1.000000 M_cpd00010_c0 + 1.000000 M_cpd01772_c0 => 1.000000 M_cpd00012_c0 + 1.000000 M_cpd00067_c0 + 1.000000 M_cpd00018_c0 + 1.000000 M_cpd02021_c0		0.0018	0.0018	0.0018	0.0018	0.0018	0.0018	0.0018	0.0018	0.0018	0.0018	0.000240314	0.000240314
R_rxn02832_c0	(1R,6R)-6-hydroxy-2-succinylcyclohexa-2,4-diene-1-carboxylate hydrolyase (2-succinylbenzoate-forming)	1.000000 SHCHC[c0] => 1.000000 H2O[c0] + 1.000000 Succinylbenzoate[c0]	1.000000 M_cpd03451_c0 => 1.000000 M_cpd00001_c0 + 1.000000 M_cpd01772_c0		0.0018	0.0018	0.0018	0.0018	0.0018	0.0018	0.0018	0.0018	0.0018	0.0018	0.000240314	0.000240314
R_rxn02834_c0	Phosphoribosyl-ATP pyrophosphohydrolase	1.000000 H2O[c0] + 1.000000 Phosphoribosyl-ATP[c0] => 1.000000 PPi[c0] + 2.000000 H+[c0] + 1.000000 Phosphoribosyl-AMP[c0]	1.000000 M_cpd00001_c0 + 1.000000 M_cpd01775_c0 => 1.000000 M_cpd00012_c0 + 2.000000 M_cpd00067_c0 + 1.000000 M_cpd01777_c0		0.0245415	0.0245415	0.0245415	0.0245415	0.0245415	0.0245415	0.0245415	0.0245415	0.0245415	0.0245415	0.00327648	0.00327647
R_rxn02835_c0	1-(5-phospho-D-ribosyl)-AMP 1,6-hydrolase	1.000000 H2O[c0] + 1.000000 Phosphoribosyl-AMP[c0] <=> 1.000000 phosphoribosylformiminoaicar-phosphate[c0]	1.000000 M_cpd00001_c0 + 1.000000 M_cpd01777_c0 <=> 1.000000 M_cpd02979_c0		0.0245415	0.0245415	0.0245415	0.0245415	0.0245415	0.0245415	0.0245415	0.0245415	0.0245415	0.0245415	0.00327648	0.00327647
R_rxn02837_c0	alpha-Pinene-oxide lyase (decyclizing)	1 alpha-Pinene-oxide[c0] <=> 1 cis-2-Methyl-5-isopropylhexa-2,5-dienal[c0]	1 M_cpd01783_c0 <=> 1 M_cpd02708_c0		0	0	0	0	0	0	0	0	0	0	0	0
R_rxn02853_c0	Imidazole acetaldehyde:NAD+ oxidoreductase	1.000000 H2O[c0] + 1.000000 NAD[c0] + 1.000000 Imidazole acetaldehyde[c0] => 2.000000 H+[c0] + 1.000000 NADH[c0] + 1.000000 4-Imidazoleacetate[c0]	1.000000 M_cpd00001_c0 + 1.000000 M_cpd00003_c0 + 1.000000 M_cpd03052_c0 => 2.000000 M_cpd00067_c0 + 1.000000 M_cpd00004_c0 + 1.000000 M_cpd01831_c0		0	0	0	0	0	0	0	0	0	0	0	0
R_rxn02862_c0	O3-Acetyl-L-serine acetate-lyase (adding 3,4-dihydroxypyridin-1-yl)	1.000000 O-Acetyl-L-serine[c0] + 1.000000 3,4-Dihydroxypyridine[c0] <=> 2.000000 H+[c0] + 1.000000 Acetate[c0] + 1.000000 3-(3,4-Dihydroxypyridin-1-yl)-L-alanine[c0]	1.000000 M_cpd00722_c0 + 1.000000 M_cpd01877_c0 <=> 2.000000 M_cpd00067_c0 + 1.000000 M_cpd00029_c0 + 1.000000 M_cpd02715_c0		0	0	0	0	0	0	0	0	0	0	0	0
R_rxn02895_c0	5-Phospho-D-ribosylamine:glycine ligase (ADP-forming)	1.000000 ATP[c0] + 1.000000 Glycine[c0] + 1.000000 5-Phosphoribosylamine[c0] => 1.000000 H+[c0] + 1.000000 ADP[c0] + 1.000000 Phosphate[c0] + 1.000000 GAR[c0]	1.000000 M_cpd00002_c0 + 1.000000 M_cpd00033_c0 + 1.000000 M_cpd01982_c0 => 1.000000 M_cpd00067_c0 + 1.000000 M_cpd00008_c0 + 1.000000 M_cpd00009_c0 + 1.000000 M_cpd02394_c0		0.0179735	0.0179735	0.0179735	0.0179735	0.0179735	0.0179735	0.0179735	0.0179735	0.0179735	0.0179735	0.0023996	0.0023996
R_rxn02897_c0	Nicotinate-nucleotide:dimethylbenzimidazole phospho-D-ribosyltransferase	1.000000 Nicotinate ribonucleotide[c0] + 1.000000 Dimethylbenzimidazole[c0] <=> 1.000000 H+[c0] + 1.000000 Niacin[c0] + 1.000000 alpha-Ribazole 5'-phosphate[c0]	1.000000 M_cpd00873_c0 + 1.000000 M_cpd01997_c0 <=> 1.000000 M_cpd00067_c0 + 1.000000 M_cpd00218_c0 + 1.000000 M_cpd02904_c0		0.0009	0.0009	0.0009	0.0009	0.0009	0.0009	0.0009	0.0009	0.0009	0.0009	0.000120157	0.000120157
R_rxn02898_c0	O-Succinylbenzoyl-CoA 1,4-dihydroxy-2-naphthoate-lyase	1.000000 Succinylbenzoyl-CoA[c0] => 1.000000 CoA[c0] + 1.000000 1-4-Dihydroxy-2-naphthoate[c0]	1.000000 M_cpd02021_c0 => 1.000000 M_cpd00010_c0 + 1.000000 M_cpd02295_c0		0.0018	0.0018	0.0018	0.0018	0.0018	0.0018	0.0018	0.0018	0.0018	0.0018	0.000240314	0.000240314
R_rxn02914_c0	3-Phosphoserine:2-oxoglutarate aminotransferase	1.000000 2-Oxoglutarate[c0] + 1.000000 phosphoserine[c0] <=> 1.000000 L-Glutamate[c0] + 1.000000 3-Phosphonooxypyruvate[c0]	1.000000 M_cpd00024_c0 + 1.000000 M_cpd00738_c0 <=> 1.000000 M_cpd00023_c0 + 1.000000 M_cpd02069_c0		-15.3259	0	-10.9819	-2.65643	-11.5419	-2.65643	-135.136	-2.65643	-122.656	0	-10.8243	-0.354655
R_rxn02916_c0	R04175	1.000000 2-Oxo-6-aminocaproate[c0] => 1.000000 H+[c0] + 1.000000 H2O[c0] + 1.000000 delta1-Piperideine-2-carboxylate[c0]	1.000000 M_cpd02074_c0 => 1.000000 M_cpd00067_c0 + 1.000000 M_cpd00001_c0 + 1.000000 M_cpd00922_c0		0	0	0	0	0	0	0	0	0	0	0	0
R_rxn02937_c0	2-(Formamido)-N1-(5-phosphoribosyl)acetamidine cyclo-ligase (ADP-forming)	1.000000 ATP[c0] + 1.000000 5'-Phosphoribosylformylglycinamidine[c0] <=> 1.000000 H+[c0] + 1.000000 ADP[c0] + 1.000000 Phosphate[c0] + 1.000000 AIR[c0]	1.000000 M_cpd00002_c0 + 1.000000 M_cpd02826_c0 <=> 1.000000 M_cpd00067_c0 + 1.000000 M_cpd00008_c0 + 1.000000 M_cpd00009_c0 + 1.000000 M_cpd02140_c0		0.0179735	0.0179735	0.0179735	0.0179735	0.0179735	0.0179735	0.0179735	0.0179735	0.0179735	0.0179735	0.0023996	0.0023996
R_rxn02939_c0	4-phospho-D-erythronate:NAD+ 2-oxidoreductase	1 NAD[c0] + 1 4-Phosphoerythronate[c0] <=> 1 NADH[c0] + 1 H+[c0] + 1 2-Oxo-3-hydroxy-4-phosphobutanoate[c0]	1 M_cpd00003_c0 + 1 M_cpd02147_c0 <=> 1 M_cpd00004_c0 + 1 M_cpd00067_c0 + 1 M_cpd03606_c0		0.0009	0.0009	0.0009	0.0009	0.0009	0.0009	0.0009	0.0009	0.0009	0.0009	0.000120157	0.000120157
R_rxn02945_c0	prephytoene diphosphate:geranylgeranyl-diphosphate geranylgeranyltransferase	1.000000 Prephytoene diphosphate[c0] => 1.000000 PPi[c0] + 1.000000 H+[c0] + 1.000000 15-cis-Phytoene[c0]	1.000000 M_cpd02168_c0 => 1.000000 M_cpd00012_c0 + 1.000000 M_cpd00067_c0 + 1.000000 M_cpd03211_c0		0	0	0	0	0	0	0	0	0	0	0	0
R_rxn02961_c0	CTP:ethanolamine-phosphate cytidylyltransferase	1.000000 CTP[c0] + 1.000000 Ciliatine[c0] <=> 1.000000 PPi[c0] + 1.000000 H+[c0] + 1.000000 CMPciliatine[c0]	1.000000 M_cpd00052_c0 + 1.000000 M_cpd02233_c0 <=> 1.000000 M_cpd00012_c0 + 1.000000 M_cpd00067_c0 + 1.000000 M_cpd03379_c0		0	0	0	0	0	0	0	0	0	0	0	0
R_rxn02988_c0	glycerone phosphate:iminosuccinate alkyltransferase (cyclizing)	1.000000 Glycerone-phosphate[c0] + 1.000000 Iminoaspartate[c0] => 1.000000 Phosphate[c0] + 2.000000 H2O[c0] + 1.000000 Quinolinate[c0]	1.000000 M_cpd00095_c0 + 1.000000 M_cpd03470_c0 => 1.000000 M_cpd00009_c0 + 2.000000 M_cpd00001_c0 + 1.000000 M_cpd02333_c0		0	-3e-10	0	-3e-10	0	-3e-10	0	-4e-10	0	-3e-10	0	0
R_rxn03012_c0	R04336	1.000000 L-2-Amino-6-oxopimelate[c0] => 1.000000 H+[c0] + 1.000000 H2O[c0] + 1.000000 tetrahydrodipicolinate[c0]	1.000000 M_cpd02414_c0 => 1.000000 M_cpd00067_c0 + 1.000000 M_cpd00001_c0 + 1.000000 M_cpd02465_c0		0	0	0	0	0	0	0	0	0	0	0	0
R_rxn03031_c0	Succinyl-CoA:2,3,4,5-tetrahydropyridine-2,6-dicarboxylate N-succinyltransferase	1.000000 CoA[c0] + 1.000000 N-Succinyl-L-2-amino-6-oxopimelate[c0] => 1.000000 H2O[c0] + 1.000000 Succinyl-CoA[c0] + 1.000000 tetrahydrodipicolinate[c0]	1.000000 M_cpd00010_c0 + 1.000000 M_cpd02724_c0 => 1.000000 M_cpd00001_c0 + 1.000000 M_cpd00078_c0 + 1.000000 M_cpd02465_c0		0	0	0	0	0	0	0	0	0	0	0	0
R_rxn03046_c0	ATP:guanidinoethyyl-methyl-phosphate phosphotransferase	1.000000 ATP[c0] + 1.000000 Guanidinoethyl methyl phosphate[c0] <=> 1.000000 H+[c0] + 1.000000 ADP[c0] + 1.000000 N'-Phosphoguanidinoethyl methyl phosphate[c0]	1.000000 M_cpd00002_c0 + 1.000000 M_cpd02519_c0 <=> 1.000000 M_cpd00067_c0 + 1.000000 M_cpd00008_c0 + 1.000000 M_cpd02744_c0		0	0	0	0	0	0	0	0	0	0	0	0
R_rxn03057_c0	5-Methylthio-5-deoxy-D-ribose-1-phosphate ketol-isomerase	1.000000 methylthioribose-1-phosphate[c0] <=> 1.000000 methylthioribulose-1-phosphate[c0]	1.000000 M_cpd02574_c0 <=> 1.000000 M_cpd02791_c0		0.0009	0.0009	0.0009	0.0009	0.0009	0.0009	0.0009	0.0009	0.0009	0.0009	0.000120157	0.000120157
R_rxn03062_c0	3-Isopropylmalate:NAD+ oxidoreductase	1.000000 NAD[c0] + 1.000000 3-Isopropylmalate[c0] <=> 1.000000 H+[c0] + 1.000000 NADH[c0] + 1.000000 2-isopropyl-3-oxosuccinate[c0]	1.000000 M_cpd00003_c0 + 1.000000 M_cpd02693_c0 <=> 1.000000 M_cpd00067_c0 + 1.000000 M_cpd00004_c0 + 1.000000 M_cpd02605_c0		0.163838	0.163838	0.163838	0.163838	0.163838	0.163838	0.163838	0.163838	0.163838	0.163838	0.0218737	0.0218736
R_rxn03063_c0	S-Adenosyl-L-methionine:zymosterol C-methyltransferase	1.000000 S-Adenosyl-L-methionine[c0] + 1.000000 Zymosterol[c0] <=> 1.000000 H+[c0] + 1.000000 S-Adenosyl-homocysteine[c0] + 1.000000 Fecosterol[c0]	1.000000 M_cpd00017_c0 + 1.000000 M_cpd03221_c0 <=> 1.000000 M_cpd00067_c0 + 1.000000 M_cpd00019_c0 + 1.000000 M_cpd02755_c0		0	0	0	0	0	0	0	0	0	0	0	0
R_rxn03068_c0	(R)-2,3-Dihydroxy-3-methylbutanoate:NADP+ oxidoreductase (isomerizing)	1.000000 NADP[c0] + 1.000000 2,3-Dihydroxy-isovalerate[c0] <=> 1.000000 H+[c0] + 1.000000 NADPH[c0] + 1.000000 2-Oxo-3-hydroxyisovalerate[c0]	1.000000 M_cpd00006_c0 + 1.000000 M_cpd02498_c0 <=> 1.000000 M_cpd00067_c0 + 1.000000 M_cpd00005_c0 + 1.000000 M_cpd02569_c0		0	0	0	0	0	0	0	0	0	0	0	0
R_rxn03079_c0	5,10-Methylenetetrahydromethanopterin:coenzyme-F420 oxidoreductase	1.000000 H+[c0] + 1.000000 Coenzyme F420[c0] + 1.000000 5,10-Methylenetetrahydromethanopterin[c0] <=> 1.000000 Reduced coenzyme F420[c0] + 1.000000 5,10-Methenyltetrahydromethanopterin[c0]	1.000000 M_cpd00067_c0 + 1.000000 M_cpd00649_c0 + 1.000000 M_cpd02679_c0 <=> 1.000000 M_cpd00792_c0 + 1.000000 M_cpd02655_c0		0	0	0	0	0	0	0	0	0	0	0	0
R_rxn03080_c0	5-amino-6-(D-ribitylamino)uracil butanedionetransferase	1.000000 3-4-dihydroxy-2-butanone4-phosphate[c0] + 1.000000 4--1-D-Ribitylamino-5-aminouracil[c0] <=> 1.000000 H+[c0] + 1.000000 Phosphate[c0] + 2.000000 H2O[c0] + 1.000000 6-7-Dimethyl-8--1-D-ribityllumazine[c0]	1.000000 M_cpd11225_c0 + 1.000000 M_cpd02882_c0 <=> 1.000000 M_cpd00067_c0 + 1.000000 M_cpd00009_c0 + 2.000000 M_cpd00001_c0 + 1.000000 M_cpd02656_c0		0.00012274	0.00012274	0.00012274	0.00012274	0.00012274	0.00012274	0.00012274	0.00012274	0.00012274	0.00012274	1.63868e-05	1.6387e-05
R_rxn03084_c0	5'-Phosphoribosylformylglycinamide:L-glutamine amido-ligase (ADP-forming)	1.000000 ATP[c0] + 1.000000 H2O[c0] + 1.000000 L-Glutamine[c0] + 1.000000 N-Formyl-GAR[c0] => 1.000000 H+[c0] + 1.000000 ADP[c0] + 1.000000 Phosphate[c0] + 1.000000 L-Glutamate[c0] + 1.000000 5'-Phosphoribosylformylglycinamidine[c0]	1.000000 M_cpd00002_c0 + 1.000000 M_cpd00001_c0 + 1.000000 M_cpd00053_c0 + 1.000000 M_cpd02678_c0 => 1.000000 M_cpd00067_c0 + 1.000000 M_cpd00008_c0 + 1.000000 M_cpd00009_c0 + 1.000000 M_cpd00023_c0 + 1.000000 M_cpd02826_c0		0.0179735	0.0179735	0.0179735	0.0179735	0.0179735	0.0179735	0.0179735	0.0179735	0.0179735	0.0179735	0.0023996	0.0023996
R_rxn03087_c0	N-Succinyl-L-2,6-diaminoheptanedioate:2-oxoglutarate amino-transferase	1.000000 N-Succinyl-L-2,6-diaminopimelate[c0] + 1.000000 2-Oxoglutarate[c0] <=> 1.000000 N-Succinyl-L-2-amino-6-oxopimelate[c0] + 1.000000 L-Glutamate[c0]	1.000000 M_cpd02698_c0 + 1.000000 M_cpd00024_c0 <=> 1.000000 M_cpd02724_c0 + 1.000000 M_cpd00023_c0		-0.0845007	-0.0845008	-0.0845007	-0.0845008	-0.0845007	-0.0845008	-0.0845007	-0.0845008	-0.0845007	-0.0845008	-0.0112815	-0.0112815
R_rxn03094_c0	Glycodeoxycholate amidohydrolase	1.000000 H2O[c0] + 1.000000 Glycodeoxycholate[c0] <=> 1.000000 Glycine[c0] + 1.000000 Deoxycholate[c0]	1.000000 M_cpd00001_c0 + 1.000000 M_cpd03245_c0 <=> 1.000000 M_cpd00033_c0 + 1.000000 M_cpd02733_c0		0	0	0	0	0	0	0	0	0	0	0	0
R_rxn03095_c0	Taurodeoxycholate amidohydrolase	1.000000 H2O[c0] + 1.000000 Taurodeoxycholate[c0] <=> 1.000000 Taurine[c0] + 1.000000 Deoxycholate[c0]	1.000000 M_cpd00001_c0 + 1.000000 M_cpd03244_c0 <=> 1.000000 M_cpd00210_c0 + 1.000000 M_cpd02733_c0		0	0	0	0	0	0	0	0	0	0	0	0
R_rxn03108_c0	ATP:4-amino-2-methyl-5-phosphomethylpyrimidine phosphotransferase	1.000000 H+[c0] + 1.000000 ATP[c0] + 1.000000 4-Amino-5-phosphomethyl-2-methylpyrimidine[c0] <=> 1.000000 ADP[c0] + 1.000000 4-Amino-2-methyl-5-diphosphomethylpyrimidine[c0]	1.000000 M_cpd00067_c0 + 1.000000 M_cpd00002_c0 + 1.000000 M_cpd02775_c0 <=> 1.000000 M_cpd00008_c0 + 1.000000 M_cpd02894_c0		0	0	0	0	0	0	0	0	0	0	0	0
R_rxn03120_c0	UDP-apiose:apigenin 7-O-beta-D-glucoside 2''-O-beta-D-apiofuranosyltransferase	1.000000 UDP-apiose[c0] + 1.000000 Cosmetin[c0] <=> 1.000000 UDP[c0] + 1.000000 Apiin[c0]	1.000000 M_cpd01140_c0 + 1.000000 M_cpd02807_c0 <=> 1.000000 M_cpd00014_c0 + 1.000000 M_cpd02952_c0		0	0	0	0	0	0	0	0	0	0	0	0
R_rxn03130_c0	UDP-2,3-bis[(3R)-3-hydroxymyristoyl]-alpha-D-glucosamine 2,3-bis[(3R)-3-hydroxymyristoyl]-beta-D-glucosaminyl 1-phosphate phosphohydrolase	1.000000 H2O[c0] + 1.000000 UDP-2,3-bis(3-hydroxytetradecanoyl)glucosamine[c0] => 2.000000 H+[c0] + 1.000000 UMP[c0] + 1.000000 Lipid X[c0]	1.000000 M_cpd00001_c0 + 1.000000 M_cpd02835_c0 => 2.000000 M_cpd00067_c0 + 1.000000 M_cpd00091_c0 + 1.000000 M_cpd02930_c0		0.000557761	0.000557759	0.000557761	0.000557759	0.000557761	0.000557759	0.000557761	0.000557759	0.000557761	0.000557759	7.44654e-05	7.4463e-05
R_rxn03135_c0	R04558	1.000000 L-Glutamine[c0] + 1.000000 phosphoribulosylformimino-AICAR-phosphate[c0] => 2.000000 H+[c0] + 1.000000 L-Glutamate[c0] + 1.000000 D-erythro-imidazol-glycerol-phosphate[c0] + 1.000000 AICAR[c0]	1.000000 M_cpd00053_c0 + 1.000000 M_cpd02991_c0 => 2.000000 M_cpd00067_c0 + 1.000000 M_cpd00023_c0 + 1.000000 M_cpd02843_c0 + 1.000000 M_cpd02851_c0		0.0245415	0.0245415	0.0245415	0.0245415	0.0245415	0.0245415	0.0245415	0.0245415	0.0245415	0.0245415	0.00327648	0.00327647
R_rxn03136_c0	1-(5'-Phosphoribosyl)-5-amino-4-(N-succinocarboxamide)-imidazole AMP-lyase	1.000000 SAICAR[c0] <=> 1.000000 H+[c0] + 1.000000 Fumarate[c0] + 1.000000 AICAR[c0]	1.000000 M_cpd02921_c0 <=> 1.000000 M_cpd00067_c0 + 1.000000 M_cpd00106_c0 + 1.000000 M_cpd02851_c0		0.0179735	0.0179735	0.0179735	0.0179735	0.0179735	0.0179735	0.0179735	0.0179735	0.0179735	0.0179735	0.0023996	0.0023996
R_rxn03137_c0	10-Formyltetrahydrofolate:5'-phosphoribosyl-5-amino-4-imidazolecarboxamide formyltransferase	1.000000 10-Formyltetrahydrofolate[c0] + 1.000000 AICAR[c0] <=> 1.000000 Tetrahydrofolate[c0] + 1.000000 FAICAR[c0]	1.000000 M_cpd00201_c0 + 1.000000 M_cpd02851_c0 <=> 1.000000 M_cpd00087_c0 + 1.000000 M_cpd02884_c0		0.042515	0.042515	0.042515	0.042515	0.042515	0.042515	0.042515	0.042515	0.042515	0.042515	0.00567608	0.00567608
R_rxn03140_c0	UDP-N-acetylmuramoyl-L-alanyl-D-glutamyl-L-lysine:alanyl-D-alanine ligase (ADP-forming)	1 ATP[c0] + 1 Ala-Ala[c0] + 1 UDP-N-acetylmuramoyl-L-alanyl-D-glutamyl-L-lysine[c0] => 1 ADP[c0] + 1 Phosphate[c0] + 1 H+[c0] + 1 UDP-N-acetylmuramoyl-L-alanyl-D-glutamyl-L-lysyl-D-alanyl-D-alanine[c0]	1 M_cpd00002_c0 + 1 M_cpd00731_c0 + 1 M_cpd02861_c0 => 1 M_cpd00008_c0 + 1 M_cpd00009_c0 + 1 M_cpd00067_c0 + 1 M_cpd02943_c0		0	0	0	0	0	0	0	0	0	0	0	0
R_rxn03146_c0	UDP-3-O-[(3R)-3-hydroxymyristoyl]-N-acetylglucosamine amidohydrolase	1.000000 H2O[c0] + 1.000000 UDP-3-O-(beta-hydroxymyristoyl)-N-acetylglucosamine[c0] <=> 1.000000 Acetate[c0] + 1.000000 UDP-3-O-(beta-hydroxymyristoyl)-D-glucosamine[c0]	1.000000 M_cpd00001_c0 + 1.000000 M_cpd02886_c0 <=> 1.000000 M_cpd00029_c0 + 1.000000 M_cpd03584_c0		0.00111552	0.00111552	0.00111552	0.00111552	0.00111552	0.00111552	0.00111552	0.00111552	0.00111552	0.00111552	0.000148931	0.000148926
R_rxn03147_c0	1-(5-Phosphoribosyl)-5-amino-4-carboxyimidazole:L-aspartate ligase (ADP-forming)	1.000000 ATP[c0] + 1.000000 L-Aspartate[c0] + 1.000000 5'-Phosphoribosyl-4-carboxy-5-aminoimidazole[c0] => 1.000000 H+[c0] + 1.000000 ADP[c0] + 1.000000 Phosphate[c0] + 1.000000 SAICAR[c0]	1.000000 M_cpd00002_c0 + 1.000000 M_cpd00041_c0 + 1.000000 M_cpd02893_c0 => 1.000000 M_cpd00067_c0 + 1.000000 M_cpd00008_c0 + 1.000000 M_cpd00009_c0 + 1.000000 M_cpd02921_c0		0.0179735	0.0179735	0.0179735	0.0179735	0.0179735	0.0179735	0.0179735	0.0179735	0.0179735	0.0179735	0.0023996	0.0023996
R_rxn03150_c0	R04594	1.000000 H2O[c0] + 1.000000 alpha-Ribazole 5'-phosphate[c0] => 1.000000 Phosphate[c0] + 1.000000 alpha-Ribazole[c0]	1.000000 M_cpd00001_c0 + 1.000000 M_cpd02904_c0 => 1.000000 M_cpd00009_c0 + 1.000000 M_cpd03423_c0		0.0009	0.0009	0.0009	0.0009	0.0009	0.0009	0.0009	0.0009	0.0009	0.0009	0.000120157	0.000120157
R_rxn03159_c0	UDP-2,3-bis(3-hydroxytetradecanoyl)glucosamine:2,3-bis-(3-hydroxytetradecanoyl)-alpha-D-glucosaminyl-1-phosphate 2,3-bis(3-hydroxytetradecanoyl)-glucosaminyltransferase	1.000000 UDP-2,3-bis(3-hydroxytetradecanoyl)glucosamine[c0] + 1.000000 Lipid X[c0] <=> 1.000000 UDP[c0] + 1.000000 Lipid A disaccharide[c0]	1.000000 M_cpd02835_c0 + 1.000000 M_cpd02930_c0 <=> 1.000000 M_cpd00014_c0 + 1.000000 M_cpd03002_c0		0.000557761	0.000557759	0.000557761	0.000557759	0.000557761	0.000557759	0.000557761	0.000557759	0.000557761	0.000557759	7.44654e-05	7.4463e-05
R_rxn03164_c0	UDP-N-acetylmuramoyl-L-alanyl-D-glutamyl-meso-2,6-diaminoheptanedioate:D-alanyl-D-alanine ligase(ADP-forming)	1.000000 ATP[c0] + 1.000000 UDP-N-acetylmuramoyl-L-alanyl-D-gamma-glutamyl-meso-2-6-diaminopimelate[c0] + 1.000000 Ala-Ala[c0] => 1.000000 H+[c0] + 1.000000 ADP[c0] + 1.000000 Phosphate[c0] + 1.000000 UDP-N-acetylmuramoyl-L-alanyl-D-glutamyl-6-carboxy-L-lysyl-D-alanyl- D-alanine[c0]	1.000000 M_cpd00002_c0 + 1.000000 M_cpd02964_c0 + 1.000000 M_cpd00731_c0 => 1.000000 M_cpd00067_c0 + 1.000000 M_cpd00008_c0 + 1.000000 M_cpd00009_c0 + 1.000000 M_cpd02968_c0		0.0147807	0.0147807	0.0147807	0.0147807	0.0147807	0.0147807	0.0147807	0.0147807	0.0147807	0.0147807	0.00197333	0.00197333
R_rxn03167_c0	2-Amino-4-hydroxy-6-(erythro-1,2,3-trihydroxypropyl) dihydropteridine triphosphate phosphohydrolase (alkaline optimum)	3.000000 H2O[c0] + 1.000000 7,8-Dihydroneopterin 3'-triphosphate[c0] => 3.000000 H+[c0] + 3.000000 Phosphate[c0] + 1.000000 Dihydroneopterin[c0]	3.000000 M_cpd00001_c0 + 1.000000 M_cpd02978_c0 => 3.000000 M_cpd00067_c0 + 3.000000 M_cpd00009_c0 + 1.000000 M_cpd02961_c0		0.0027	0.0027	0.0027	0.0027	0.0027	0.0027	0.0027	0.0027	0.0027	0.0027	0.000360471	0.00036047
R_rxn03174_c0	2-Amino-4-hydroxy-6-(erythro-1,2,3-trihydroxypropyl) dihydropteridine triphosphate hydrolase	1.000000 2,5-Diamino-6-(5'-triphosphoryl-3',4'-trihydroxy-2'-oxopentyl)- amino-4-oxopyrimidine[c0] => 1.000000 H2O[c0] + 1.000000 7,8-Dihydroneopterin 3'-triphosphate[c0]	1.000000 M_cpd03666_c0 => 1.000000 M_cpd00001_c0 + 1.000000 M_cpd02978_c0		0	0.0027	0	0.0027	0	0.0027	0	0.0027	0	0.0027	0	0.00036047
R_rxn03175_c0	N-(5'-Phospho-D-ribosylformimino)-5-amino-1- (5''-phospho-D-ribosyl)-4-imidazolecarboxamide ketol-isomerase	1.000000 H+[c0] + 1.000000 phosphoribosylformiminoaicar-phosphate[c0] <=> 1.000000 phosphoribulosylformimino-AICAR-phosphate[c0]	1.000000 M_cpd00067_c0 + 1.000000 M_cpd02979_c0 <=> 1.000000 M_cpd02991_c0		0.0245415	0.0245415	0.0245415	0.0245415	0.0245415	0.0245415	0.0245415	0.0245415	0.0245415	0.0245415	0.00327648	0.00327647
R_rxn03181_c0	ATP:2,3,2',3'-tetrakis(3-hydroxytetradecanoyl)-D-glucosaminyl-beta-D-1,6-glucosaminyl-alpha-phosphate 4-O'-phosphotransferase	1.000000 ATP[c0] + 1.000000 Lipid A disaccharide[c0] <=> 1.000000 H+[c0] + 1.000000 ADP[c0] + 1.000000 Lipid IV(A)[c0]	1.000000 M_cpd00002_c0 + 1.000000 M_cpd03002_c0 <=> 1.000000 M_cpd00067_c0 + 1.000000 M_cpd00008_c0 + 1.000000 M_cpd02993_c0		0.000557761	0.000557759	0.000557761	0.000557759	0.000557761	0.000557759	0.000557761	0.000557759	0.000557761	0.000557759	7.44654e-05	7.4463e-05
R_rxn03182_c0	CMP-3-deoxy-D-manno-oct-2-ulosonate:lipid IVA 3-deoxy-D-manno-oct-2-ulosonate transferase	1.000000 Lipid IV(A)[c0] + 1.000000 CMP-KDO[c0] => 1.000000 H+[c0] + 1.000000 CMP[c0] + 1.000000 KDO-lipid IV(A)[c0]	1.000000 M_cpd02993_c0 + 1.000000 M_cpd02546_c0 => 1.000000 M_cpd00067_c0 + 1.000000 M_cpd00046_c0 + 1.000000 M_cpd03585_c0		0.000557761	0.000557759	0.000557761	0.000557759	0.000557761	0.000557759	0.000557761	0.000557759	0.000557761	0.000557759	7.44654e-05	7.4463e-05
R_rxn03185_c0	R04661	1.000000 CMP-N-acetylneuraminate[c0] + 1.000000 GD1a[c0] => 1.000000 H+[c0] + 1.000000 CMP[c0] + 1.000000 GT1b[c0]	1.000000 M_cpd00112_c0 + 1.000000 M_cpd02999_c0 => 1.000000 M_cpd00067_c0 + 1.000000 M_cpd00046_c0 + 1.000000 M_cpd03660_c0		0	0	0	0	0	0	0	0	0	0	0	0
R_rxn03194_c0	(S)-2-Aceto-2-hydroxybutanoate pyruvate-lyase (carboxylating)	1.000000 2-Hydroxyethyl-ThPP[c0] + 1.000000 2-Oxobutyrate[c0] <=> 1.000000 TPP[c0] + 1.000000 2-Aceto-2-hydroxybutanoate[c0]	1.000000 M_cpd03049_c0 + 1.000000 M_cpd00094_c0 <=> 1.000000 M_cpd00056_c0 + 1.000000 M_cpd00498_c0		0.0989454	0.0989454	0.0989454	0.0989454	0.0989454	0.0989454	0.0989454	0.0989454	0.0989454	0.0989454	0.01321	0.01321
R_rxn03236_c0	4a-hydroxytetrahydrobiopterin hydro-lyase	1.000000 4a-Hydroxytetrahydrobiopterin[c0] <=> 1.000000 H2O[c0] + 1.000000 Dihydrobiopterin[c0]	1.000000 M_cpd03897_c0 <=> 1.000000 M_cpd00001_c0 + 1.000000 M_cpd00231_c0		0	0	0	0	0	0	0	0	0	0	0	0
R_rxn03282_c0	R04805	1.000000 NAD[c0] + 1.000000 5beta-Cholestane-3alpha,7alpha,26-triol[c0] <=> 1.000000 H+[c0] + 1.000000 NADH[c0] + 1.000000 3alpha,7alpha-Dihydroxy-5beta-cholestan-26-al[c0]	1.000000 M_cpd00003_c0 + 1.000000 M_cpd03227_c0 <=> 1.000000 M_cpd00067_c0 + 1.000000 M_cpd00004_c0 + 1.000000 M_cpd03228_c0		0	0	0	0	0	0	0	0	0	0	0	0
R_rxn03323_c0	R04857	2.000000 H+[c0] + 1.000000 H2O[c0] + 1.000000 5-Ureido-4-imidazole carboxylate[c0] <=> 1.000000 CO2[c0] + 1.000000 NH3[c0] + 1.000000 5-Amino-4-imidazole carboxylate[c0]	2.000000 M_cpd00067_c0 + 1.000000 M_cpd00001_c0 + 1.000000 M_cpd03280_c0 <=> 1.000000 M_cpd00011_c0 + 1.000000 M_cpd00013_c0 + 1.000000 M_cpd03281_c0		0	0	0	0	0	0	0	0	0	0	0	0
R_rxn03333_c0	3,4-dihydroxyphenylethyleneglycol:NAD+ oxidoreductase	1.000000 NAD[c0] + 1.000000 3,4-Dihydroxyphenylethyleneglycol[c0] <=> 1.000000 H+[c0] + 1.000000 NADH[c0] + 1.000000 3,4-Dihydroxymandelaldehyde[c0]	1.000000 M_cpd00003_c0 + 1.000000 M_cpd03306_c0 <=> 1.000000 M_cpd00067_c0 + 1.000000 M_cpd00004_c0 + 1.000000 M_cpd03307_c0		0	0	0	0	0	0	0	0	0	0	0	0
R_rxn03365_c0	R04916	1.000000 H2O[c0] + 1.000000 NAD[c0] + 1.000000 5-(2'-Formylethyl)-4,6-dihydroxypicolinate[c0] <=> 2.000000 H+[c0] + 1.000000 NADH[c0] + 1.000000 5-(2'-Carboxyethyl)-4,6-dihydroxypicolinate[c0]	1.000000 M_cpd00001_c0 + 1.000000 M_cpd00003_c0 + 1.000000 M_cpd03365_c0 <=> 2.000000 M_cpd00067_c0 + 1.000000 M_cpd00004_c0 + 1.000000 M_cpd03366_c0		0	0	0	0	0	0	0	0	0	0	0	0
R_rxn03373_c0	ATP:selenate adenylyltransferase	1.000000 ATP[c0] + 1.000000 Selenate[c0] <=> 1.000000 PPi[c0] + 1.000000 H+[c0] + 1.000000 Adenylylselenate[c0]	1.000000 M_cpd00002_c0 + 1.000000 M_cpd03396_c0 <=> 1.000000 M_cpd00012_c0 + 1.000000 M_cpd00067_c0 + 1.000000 M_cpd03388_c0		0	0	0	0	0	0	0	0	0	0	0	0
R_rxn03378_c0	Se-Adenosylselenohomocysteine hydrolase	1.000000 H2O[c0] + 1.000000 Se-Adenosylselenohomocysteine[c0] <=> 1.000000 Adenosine[c0] + 1.000000 Selenohomocysteine[c0]	1.000000 M_cpd00001_c0 + 1.000000 M_cpd03393_c0 <=> 1.000000 M_cpd00182_c0 + 1.000000 M_cpd03397_c0		0	0	0	0	0	0	0	0	0	0	0	0
R_rxn03384_c0	Uroporphyrinogen I carboxy-lyase	4.000000 H+[c0] + 1.000000 UroporphyrinogenI[c0] <=> 4.000000 CO2[c0] + 1.000000 CoproporphyrinogenI[c0]	4.000000 M_cpd00067_c0 + 1.000000 M_cpd03414_c0 <=> 4.000000 M_cpd00011_c0 + 1.000000 M_cpd03416_c0		0	0	0	0	0	0	0	0	0	0	0	0
R_rxn03393_c0	3-octaprenyl-4-hydroxybenzoate carboxy-lyase	1.000000 H+[c0] + 1.000000 3-Octaprenyl-4-hydroxybenzoate[c0] => 1.000000 CO2[c0] + 1.000000 2-Octaprenylphenol[c0]	1.000000 M_cpd00067_c0 + 1.000000 M_cpd03443_c0 => 1.000000 M_cpd00011_c0 + 1.000000 M_cpd03444_c0		0	-5e-10	0	-4e-10	0	-4e-10	0	-4e-10	0	0.112948	0	1e-10
R_rxn03395_c0	S-adenosyl-L-methionine:3-(all-trans-octaprenyl)benzene-1,2-diol 2-O-methyltransferase	1.000000 S-Adenosyl-L-methionine[c0] + 1.000000 2-Octaprenyl-6-hydroxyphenol[c0] <=> 1.000000 H+[c0] + 1.000000 S-Adenosyl-homocysteine[c0] + 1.000000 2-Octaprenyl-6-methoxyphenol[c0]	1.000000 M_cpd00017_c0 + 1.000000 M_cpd03445_c0 <=> 1.000000 M_cpd00067_c0 + 1.000000 M_cpd00019_c0 + 1.000000 M_cpd03446_c0		0	-5e-10	0	-4e-10	0	-4e-10	0	-4e-10	0	0.112948	0	1e-10
R_rxn03397_c0	UDP-L-rhamnose:flavonol-3-O-D-glucoside L-rhamnosyltransferase	1.000000 S-Adenosyl-L-methionine[c0] + 1.000000 2-Octaprenyl-6-methoxy-1,4-benzoquinone[c0] => 1.000000 H+[c0] + 1.000000 S-Adenosyl-homocysteine[c0] + 1.000000 2-Octaprenyl-3-methyl-6-methoxy-1,4-benzoquinone[c0]	1.000000 M_cpd00017_c0 + 1.000000 M_cpd03447_c0 => 1.000000 M_cpd00067_c0 + 1.000000 M_cpd00019_c0 + 1.000000 M_cpd03448_c0		0	-5e-10	0	-4e-10	0	-4e-10	0	-4e-10	0	0.112948	0	1e-10
R_rxn03405_c0	UDP-N-acetylglucosamine-N-acetylmuramyl-(pentapeptide)pyrophosphoryl-undecaprenol N-acetylglucosamine transferase	1 UDP-N-acetylglucosamine[c0] + 1 N-acetylmuramoyl-L-alanyl-D-glutamyl-L-lysyl-D-alanyl-D-alanine-diphosphoundecaprenol[c0] <=> 1 UDP[c0] + 1 Undecaprenyl-diphospho-N-acetylmuramoyl-(N-acetylglucosamine)-L-alanyl-D-glutamyl-L-lysyl-D-alanyl-D-alanine[c0]	1 M_cpd00037_c0 + 1 M_cpd03486_c0 <=> 1 M_cpd00014_c0 + 1 M_cpd03487_c0		0	0	0	0	0	0	0	0	0	0	0	0
R_rxn03406_c0	Undecaprenyl-diphospho-N-acetylmuramoyl-(N-acetylglucosamine)-	1.000000 ATP[c0] + 1.000000 NH3[c0] + 1.000000 Undecaprenyl-diphospho-N-acetylmuramoyl-(N-acetylglucosamine)-L-alanyl-D-glutamyl-L-lysyl-D-alanyl-D-alanine[c0] => 1.000000 H+[c0] + 1.000000 ADP[c0] + 1.000000 Phosphate[c0] + 1.000000 Undecaprenyl-diphospho-N-acetylmuramoyl-(N-acetylglucosamine)-L-alanyl-D-glutaminyl-L-lysyl-D-alanyl-D-alanine[c0]	1.000000 M_cpd00002_c0 + 1.000000 M_cpd00013_c0 + 1.000000 M_cpd03487_c0 => 1.000000 M_cpd00067_c0 + 1.000000 M_cpd00008_c0 + 1.000000 M_cpd00009_c0 + 1.000000 M_cpd03488_c0		0	0	0	0	0	0	0	0	0	0	0	0
R_rxn03407_c0	Undecaprenyl-diphospho-N-acetylmuramoyl-(N-acetylglucosamine)-L-alanyl-gamma-D-glutamyl-L-lysyl-D-alanyl-D-alanine:ammonia ligase (ADP-forming)	1.000000 ATP[c0] + 1.000000 NH3[c0] + 1.000000 Undecaprenyl-diphospho-N-acetylmuramoyl-(N-acetylglucosamine)-L-alanyl-gamma-D-glutamyl-L-lysyl-D-alanyl-D-alanine[c0] => 1.000000 H+[c0] + 1.000000 ADP[c0] + 1.000000 Phosphate[c0] + 1.000000 Undecaprenyl-diphospho-N-acetylmuramoyl-(N-acetylglucosamine)-L-alanyl-D-isoglutaminyl-L-lysyl-D-alanyl-D-alanine[c0]	1.000000 M_cpd00002_c0 + 1.000000 M_cpd00013_c0 + 1.000000 M_cpd03491_c0 => 1.000000 M_cpd00067_c0 + 1.000000 M_cpd00008_c0 + 1.000000 M_cpd00009_c0 + 1.000000 M_cpd03492_c0		0	0	0	0	0	0	0	0	0	0	0	0
R_rxn03408_c0	UDP-N-acetyl-D-glucosamine:undecaprenyl-diphospho-N-acetylmuramoyl-L-alanyl-gamma-D-glutamyl-meso-2,6-diaminopimeloyl-D-alanyl-D-alanine 4-beta-N-acetylglucosaminlytransferase	1.000000 UDP-N-acetylglucosamine[c0] + 1.000000 Undecaprenyl-diphospho-N-acetylmuramoyl-L-alanyl-D-glutamyl-meso-2-6-diaminopimeloyl-D-alanyl-D-alanine[c0] <=> 1.000000 UDP[c0] + 1.000000 Undecaprenyl-diphospho-N-acetylmuramoyl--N-acetylglucosamine-L-ala-D-glu-meso-2-6-diaminopimeloyl-D-ala-D-ala[c0]	1.000000 M_cpd00037_c0 + 1.000000 M_cpd03494_c0 <=> 1.000000 M_cpd00014_c0 + 1.000000 M_cpd03495_c0		0.0147807	0.0147807	0.0147807	0.0147807	0.0147807	0.0147807	0.0147807	0.0147807	0.0147807	0.0147807	0.00197333	0.00197333
R_rxn03409_c0	Undecaprenyl-diphospho-N-acetylmuramoyl-(N-acetylglucosamine)-	1.000000 ATP[c0] + 1.000000 Undecaprenyl-diphospho-N-acetylmuramoyl--N-acetylglucosamine-L-ala-D-glu-meso-2-6-diaminopimeloyl-D-ala-D-ala[c0] + 1.000000 NH3[c0] => 1.000000 H+[c0] + 1.000000 ADP[c0] + 1.000000 Phosphate[c0] + 1.000000 Undecaprenyl-diphospho-N-acetylmuramoyl-(N-acetylglucosamine)-L-alanyl-D-glutaminyl-meso-2,6-diaminopimeloyl-D-alanyl-D-alanine[c0]	1.000000 M_cpd00002_c0 + 1.000000 M_cpd03495_c0 + 1.000000 M_cpd00013_c0 => 1.000000 M_cpd00067_c0 + 1.000000 M_cpd00008_c0 + 1.000000 M_cpd00009_c0 + 1.000000 M_cpd03496_c0		0	0	0	0	0	0	0	0	0	0	0	0
R_rxn03419_c0	formamidopyrimidine nucleoside triphosphate amidohydrolase	1.000000 H2O[c0] + 1.000000 Formamidopyrimidine nucleoside triphosphate[c0] <=> 1.000000 H+[c0] + 1.000000 Formate[c0] + 1.000000 2,5-Diaminopyrimidine nucleoside triphosphate[c0]	1.000000 M_cpd00001_c0 + 1.000000 M_cpd03518_c0 <=> 1.000000 M_cpd00067_c0 + 1.000000 M_cpd00047_c0 + 1.000000 M_cpd03519_c0		0	0.0027	0	0.0027	0	0.0027	0	0.0027	0	0.0027	0	0.00036047
R_rxn03421_c0	2,5-Diaminopyrimidine nucleoside triphosphate mutase	1.000000 2,5-Diaminopyrimidine nucleoside triphosphate[c0] <=> 1.000000 2,5-Diamino-6-(5'-triphosphoryl-3',4'-trihydroxy-2'-oxopentyl)- amino-4-oxopyrimidine[c0]	1.000000 M_cpd03519_c0 <=> 1.000000 M_cpd03666_c0		0	0.0027	0	0.0027	0	0.0027	0	0.0027	0	0.0027	0	0.00036047
R_rxn03435_c0	(R)-2,3-Dihydroxy-3-methylpentanoate:NADP+ oxidoreductase (isomerizing)	1.000000 NADP[c0] + 1.000000 2,3-Dihydroxy-3-methylvalerate[c0] <=> 1.000000 H+[c0] + 1.000000 NADPH[c0] + 1.000000 (R)-3-Hydroxy-3-methyl-2-oxopentanoate[c0]	1.000000 M_cpd00006_c0 + 1.000000 M_cpd02535_c0 <=> 1.000000 M_cpd00067_c0 + 1.000000 M_cpd00005_c0 + 1.000000 M_cpd10162_c0		-0.0989454	-0.0989454	-0.0989454	-0.0989454	-0.0989454	-0.0989454	-0.0989454	-0.0989454	-0.0989454	-0.0989454	-0.01321	-0.01321
R_rxn03436_c0	(S)-2-Aceto-2-hydroxybutanoate:NADP+ oxidoreductase (isomerizing)	1.000000 2-Aceto-2-hydroxybutanoate[c0] <=> 1.000000 (R)-3-Hydroxy-3-methyl-2-oxopentanoate[c0]	1.000000 M_cpd00498_c0 <=> 1.000000 M_cpd10162_c0		0.0989454	0.0989454	0.0989454	0.0989454	0.0989454	0.0989454	0.0989454	0.0989454	0.0989454	0.0989454	0.01321	0.01321
R_rxn03437_c0	(R)-2,3-Dihydroxy-3-methylpentanoate hydro-lyase	1.000000 2,3-Dihydroxy-3-methylvalerate[c0] => 1.000000 H2O[c0] + 1.000000 3MOP[c0]	1.000000 M_cpd02535_c0 => 1.000000 M_cpd00001_c0 + 1.000000 M_cpd00508_c0		0.0989454	0.0989454	0.0989454	0.0989454	0.0989454	0.0989454	0.0989454	0.0989454	0.0989454	0.0989454	0.01321	0.01321
R_rxn03439_c0	CMP-3-deoxy-D-manno-oct-2-ulosonate:(KDO)-lipid IVA 3-deoxy-D-manno-oct-2-ulosonate transferase	1.000000 CMP-KDO[c0] + 1.000000 KDO-lipid IV(A)[c0] => 1.000000 H+[c0] + 1.000000 CMP[c0] + 1.000000 kdo2-lipid iva[c0]	1.000000 M_cpd02546_c0 + 1.000000 M_cpd03585_c0 => 1.000000 M_cpd00067_c0 + 1.000000 M_cpd00046_c0 + 1.000000 M_cpd03586_c0		0.000557761	0.000557759	0.000557761	0.000557759	0.000557761	0.000557759	0.000557761	0.000557759	0.000557761	0.000557759	7.44654e-05	7.4463e-05
R_rxn03445_c0	O-Phospho-4-hydroxy-L-threonine:2-oxoglutarate aminotransferase	1.000000 2-Oxoglutarate[c0] + 1.000000 4-(Phosphonooxy)-threonine[c0] <=> 1.000000 L-Glutamate[c0] + 1.000000 2-Oxo-3-hydroxy-4-phosphobutanoate[c0]	1.000000 M_cpd00024_c0 + 1.000000 M_cpd03607_c0 <=> 1.000000 M_cpd00023_c0 + 1.000000 M_cpd03606_c0		-0.0009	-0.0009	-0.0009	-0.0009	-0.0009	-0.0009	-0.0009	-0.0009	-0.0009	-0.0009	-0.000120157	-0.000120157
R_rxn03446_c0	O-Phospho-4-hydroxy-L-threonine phospho-lyase (adding water)	1.000000 H2O[c0] + 1.000000 4-(Phosphonooxy)-threonine[c0] => 1.000000 Phosphate[c0] + 1.000000 4-Hydroxy-L-threonine[c0]	1.000000 M_cpd00001_c0 + 1.000000 M_cpd03607_c0 => 1.000000 M_cpd00009_c0 + 1.000000 M_cpd03608_c0		0	0	0	0	0	0	0	0	0	0	0	0
R_rxn03463_c0	R05113	1.000000 CMP-N-acetylneuraminate[c0] + 1.000000 GT1a[c0] <=> 1.000000 H+[c0] + 1.000000 CMP[c0] + 1.000000 GQ1[c0]	1.000000 M_cpd00112_c0 + 1.000000 M_cpd03658_c0 <=> 1.000000 M_cpd00067_c0 + 1.000000 M_cpd00046_c0 + 1.000000 M_cpd03659_c0		0	0	0	0	0	0	0	0	0	0	0	0
R_rxn03465_c0	Acylneuraminyl hydrolase	1.000000 GT1b[c0] + 1.000000 Neu5Ac[c0] <=> 1.000000 H2O[c0] + 1.000000 GQ1[c0]	1.000000 M_cpd03660_c0 + 1.000000 M_cpd00232_c0 <=> 1.000000 M_cpd00001_c0 + 1.000000 M_cpd03659_c0		0	0	0	0	0	0	0	0	0	0	0	0
R_rxn03467_c0	R05117	1.000000 Neu5Ac[c0] + 1.000000 GD1b[c0] => 1.000000 H2O[c0] + 1.000000 GT1b[c0]	1.000000 M_cpd00232_c0 + 1.000000 M_cpd03661_c0 => 1.000000 M_cpd00001_c0 + 1.000000 M_cpd03660_c0		0	0	0	0	0	0	0	0	0	0	0	0
R_rxn03486_c0	R05138	1.000000 H+[c0] + 1.000000 Oxopent-4-enoate[c0] + 1.000000 Acetate[c0] <=> 1.000000 H2O[c0] + 1.000000 2-Hydroxy-6-oxo-hept-2,4-dienoate[c0]	1.000000 M_cpd00067_c0 + 1.000000 M_cpd00461_c0 + 1.000000 M_cpd00029_c0 <=> 1.000000 M_cpd00001_c0 + 1.000000 M_cpd03715_c0		0	0	0	0	0	0	0	0	0	0	0	0
R_rxn03491_c0	S-Adenosyl-L-methionine:1-precorrin-6Y C5,15-methyltransferase (C-12-decarboxylating)	1.0 Precorrin 6B[c0] + 2.0 S-Adenosyl-L-methionine[c0] => 1.0 Precorrin 8[c0] + 2.0 S-Adenosyl-homocysteine[c0] + 1.0 CO2[c0] + 2.0 H+[c0]	1.0 M_cpd03760_c0 + 2.0 M_cpd00017_c0 => 1.0 M_cpd03835_c0 + 2.0 M_cpd00019_c0 + 1.0 M_cpd00011_c0 + 2.0 M_cpd00067_c0		0	0	0	0	0	0	0	0	0	0	0	0
R_rxn03492_c0	precorrin-6Y:NADP+ oxidoreductase	1.0 NADP[c0] + 1.0 Precorrin 6B[c0] <=> 1.0 Precorrin 6A[c0] + 1.0 NADPH[c0] + 1.0 H+[c0]	1.0 M_cpd00006_c0 + 1.0 M_cpd03760_c0 <=> 1.0 M_cpd03761_c0 + 1.0 M_cpd00005_c0 + 1.0 M_cpd00067_c0		0	0	0	0	0	0	0	0	0	0	0	0
R_rxn03511_c0	ADP-D-glycero-D-manno-heptose 6-epimerase	1.000000 ADP-D-glycero-D-manno-heptose[c0] <=> 1.000000 ADP-L-glycero-D-manno-heptose[c0]	1.000000 M_cpd03830_c0 <=> 1.000000 M_cpd03831_c0		0.00223104	0.00223104	0.00223104	0.00223104	0.00223104	0.00223104	0.00223104	0.00223104	0.00223104	0.00223104	0.000297862	0.000297852
R_rxn03512_c0	Precorrin 8X 11,12-methylmutase	3.000000 H+[c0] + 1.000000 Precorrin 8[c0] <=> 1.000000 Hydrogenobyrinate[c0]	3.000000 M_cpd00067_c0 + 1.000000 M_cpd03835_c0 <=> 1.000000 M_cpd03832_c0		0	0	0	0	0	0	0	0	0	0	0	0
R_rxn03513_c0	S-adenosyl-L-methionine:precorrin-3B C17-methyltransferase	1.0 Precorrin 3B[c0] + 1.0 S-Adenosyl-L-methionine[c0] => 1.0 Precorrin 4[c0] + 2.0 H+[c0] + 1.0 S-Adenosyl-homocysteine[c0]	1.0 M_cpd03833_c0 + 1.0 M_cpd00017_c0 => 1.0 M_cpd03834_c0 + 2.0 M_cpd00067_c0 + 1.0 M_cpd00019_c0		0	0	0	0	0	0	0	0	0	0	0	0
R_rxn03514_c0	S-adenosyl-L-methionine:precorrin-4 C11 methyltransferase	1.0 S-Adenosyl-L-methionine[c0] + 1.0 Precorrin 4[c0] => 1.0 S-Adenosyl-homocysteine[c0] + 1.0 H+[c0] + 1.0 Precorrin 5[c0]	1.0 M_cpd00017_c0 + 1.0 M_cpd03834_c0 => 1.0 M_cpd00019_c0 + 1.0 M_cpd00067_c0 + 1.0 M_cpd03839_c0		0	0	0	0	0	0	0	0	0	0	0	0
R_rxn03532_c0	precorrin-3A,NADH:oxygen oxidoreductase (20-hydroxylating)	1.0 NADH[c0] + 1.0 O2[c0] + 1.0 H+[c0] + 1.0 Precorrin 3A[c0] => 1.0 H2O[c0] + 1.0 NAD[c0] + 1.0 Precorrin 3B[c0]	1.0 M_cpd00004_c0 + 1.0 M_cpd00007_c0 + 1.0 M_cpd00067_c0 + 1.0 M_cpd03420_c0 => 1.0 M_cpd00001_c0 + 1.0 M_cpd00003_c0 + 1.0 M_cpd03833_c0		0	0	0	0	0	0	0	0	0	0	0	0
R_rxn03534_c0	R05219	1.0 Precorrin 5[c0] + 1.0 S-Adenosyl-L-methionine[c0] + 1.0 H2O[c0] => 1.0 Precorrin 6A[c0] + 1.0 S-Adenosyl-homocysteine[c0] + 1.0 Acetate[c0] + 2.0 H+[c0]	1.0 M_cpd03839_c0 + 1.0 M_cpd00017_c0 + 1.0 M_cpd00001_c0 => 1.0 M_cpd03761_c0 + 1.0 M_cpd00019_c0 + 1.0 M_cpd00029_c0 + 2.0 M_cpd00067_c0		0	0	0	0	0	0	0	0	0	0	0	0
R_rxn03535_c0	ATP:cob(I)yrinic acid-a,c-diamide Cobeta-adenosyltransferase	1.000000 H+[c0] + 1.000000 ATP[c0] + 1.000000 Cob(I)yrinate diamide[c0] <=> 1.000000 Triphosphate[c0] + 1.000000 Adenosyl cobyrinate diamide[c0]	1.000000 M_cpd00067_c0 + 1.000000 M_cpd00002_c0 + 1.000000 M_cpd03915_c0 <=> 1.000000 M_cpd00421_c0 + 1.000000 M_cpd03916_c0		0	0	0	0	0	0	0	0	0	0	0	0
R_rxn03536_c0	R05221	1.000000 ATP[c0] + 1.000000 Adenosyl cobinamide[c0] <=> 1.000000 H+[c0] + 1.000000 ADP[c0] + 1.000000 Adenosyl cobinamide phosphate[c0]	1.000000 M_cpd00002_c0 + 1.000000 M_cpd03918_c0 <=> 1.000000 M_cpd00067_c0 + 1.000000 M_cpd00008_c0 + 1.000000 M_cpd03919_c0		0.0009	0.0009	0.0009	0.0009	0.0009	0.0009	0.0009	0.0009	0.0009	0.0009	0.000120157	0.000120157
R_rxn03537_c0	R05222	1.000000 GTP[c0] + 1.000000 Adenosyl cobinamide phosphate[c0] <=> 1.000000 PPi[c0] + 1.000000 H+[c0] + 1.000000 Adenosylcobinamide-GDP[c0]	1.000000 M_cpd00038_c0 + 1.000000 M_cpd03919_c0 <=> 1.000000 M_cpd00012_c0 + 1.000000 M_cpd00067_c0 + 1.000000 M_cpd03920_c0		0.0009	0.0009	0.0009	0.0009	0.0009	0.0009	0.0009	0.0009	0.0009	0.0009	0.000120157	0.000120157
R_rxn03538_c0	R05223	1.000000 Adenosylcobinamide-GDP[c0] + 1.000000 alpha-Ribazole[c0] <=> 1.000000 H+[c0] + 1.000000 GMP[c0] + 1.000000 Calomide[c0]	1.000000 M_cpd03920_c0 + 1.000000 M_cpd03423_c0 <=> 1.000000 M_cpd00067_c0 + 1.000000 M_cpd00126_c0 + 1.000000 M_cpd00166_c0		0.0009	0.0009	0.0009	0.0009	0.0009	0.0009	0.0009	0.0009	0.0009	0.0009	0.000120157	0.000120157
R_rxn03539_c0	rxn03539	1.0 Hydrogenobyrinate[c0] + 2.0 L-Glutamine[c0] + 2.0 ATP[c0] + 2.0 H2O[c0] => 2.0 L-Glutamate[c0] + 1.0 Hydrogenobyrinate diamide[c0] + 2.0 ADP[c0] + 2.0 Phosphate[c0] + 2.0 H+[c0]	1.0 M_cpd03832_c0 + 2.0 M_cpd00053_c0 + 2.0 M_cpd00002_c0 + 2.0 M_cpd00001_c0 => 2.0 M_cpd00023_c0 + 1.0 M_cpd03913_c0 + 2.0 M_cpd00008_c0 + 2.0 M_cpd00009_c0 + 2.0 M_cpd00067_c0		0	0	0	0	0	0	0	0	0	0	0	0
R_rxn03540_c0	R05225	4.000000 ATP[c0] + 4.000000 H2O[c0] + 1.000000 Adenosyl cobyrinate diamide[c0] + 4.000000 L-Glutamine[c0] <=> 4.000000 H+[c0] + 4.000000 ADP[c0] + 4.000000 Phosphate[c0] + 4.000000 L-Glutamate[c0] + 1.000000 Adenosylcobyric acid[c0]	4.000000 M_cpd00002_c0 + 4.000000 M_cpd00001_c0 + 1.000000 M_cpd03916_c0 + 4.000000 M_cpd00053_c0 <=> 4.000000 M_cpd00067_c0 + 4.000000 M_cpd00008_c0 + 4.000000 M_cpd00009_c0 + 4.000000 M_cpd00023_c0 + 1.000000 M_cpd03917_c0		0	0	0	0	0	0	0	0	0	0	0	0
R_rxn03618_c0	formaldehyde:NAD+ oxidoreductase (mycothiol-formylating)	1.000000 NAD[c0] + 1.000000 Formaldehyde[c0] + 1.000000 Mycothiol[c0] <=> 1.000000 H+[c0] + 1.000000 NADH[c0] + 1.000000 S-Formylmycothiol[c0]	1.000000 M_cpd00003_c0 + 1.000000 M_cpd00055_c0 + 1.000000 M_cpd04105_c0 <=> 1.000000 M_cpd00067_c0 + 1.000000 M_cpd00004_c0 + 1.000000 M_cpd04106_c0		0	0	0	0	0	0	0	0	0	0	0	0
R_rxn03638_c0	Acetyl-CoA:D-glucosamine-1-phosphate N-acetyltransferase	1.000000 Acetyl-CoA[c0] + 1.000000 D-Glucosamine1-phosphate[c0] => 1.000000 H+[c0] + 1.000000 CoA[c0] + 1.000000 N-Acetyl-D-glucosamine1-phosphate[c0]	1.000000 M_cpd00022_c0 + 1.000000 M_cpd03671_c0 => 1.000000 M_cpd00067_c0 + 1.000000 M_cpd00010_c0 + 1.000000 M_cpd02611_c0		0.0306768	0.0306768	0.0306768	0.0306768	0.0306768	0.0306768	0.0306768	0.0306768	0.0306768	0.0306768	0.0040956	0.00409559
R_rxn03643_c0	D-arabino-hex-3-ulose-6-phosphate formaldehyde-lyase (D-ribulose-5-phosphate-forming)	1.000000 D-Ribulose5-phosphate[c0] + 1.000000 Formaldehyde[c0] => 1.000000 D-arabino-6-Phospho-hex-3-ulose[c0]	1.000000 M_cpd00171_c0 + 1.000000 M_cpd00055_c0 => 1.000000 M_cpd03583_c0		0	-6.82e-08	0	-5.28e-08	0	-5.28e-08	0	-5.28e-08	0	10.7619	0	1.76e-08
R_rxn03644_c0	D-arabino-hex-3-ulose-6-phosphate isomerase	1.000000 D-arabino-6-Phospho-hex-3-ulose[c0] <=> 1.000000 D-fructose-6-phosphate[c0]	1.000000 M_cpd03583_c0 <=> 1.000000 M_cpd00072_c0		0	-6.82e-08	0	-5.28e-08	0	-5.28e-08	0	-5.28e-08	0	10.7619	0	1.76e-08
R_rxn03665_c0	2-Hydroxy-6-oxo-7-methylocta-2,4-dienoate acylhydrolase	1.000000 H2O[c0] + 1.000000 2-Hydroxy-6-oxo-7-methylocta-2,4-dienoate[c0] <=> 1.000000 H+[c0] + 1.000000 Oxopent-4-enoate[c0] + 1.000000 Isobutyrate[c0]	1.000000 M_cpd00001_c0 + 1.000000 M_cpd03989_c0 <=> 1.000000 M_cpd00067_c0 + 1.000000 M_cpd00461_c0 + 1.000000 M_cpd01711_c0		0	0	0	0	0	0	0	0	0	0	0	0
R_rxn03666_c0	2-hydroxy-6-oxo-(2'-aminophenyl)-hexa-2,4-dienoate benzoylhydrolase	1.000000 H2O[c0] + 1.000000 2-Hydroxy-6-oxo-(2'-aminophenyl)-hexa-2,4-dienoate[c0] <=> 1.000000 H+[c0] + 1.000000 Anthranilate[c0] + 1.000000 Oxopent-4-enoate[c0]	1.000000 M_cpd00001_c0 + 1.000000 M_cpd05041_c0 <=> 1.000000 M_cpd00067_c0 + 1.000000 M_cpd00093_c0 + 1.000000 M_cpd00461_c0		0	0	0	0	0	0	0	0	0	0	0	0
R_rxn03667_c0	2-Hydroxy-6-oxo-octa-2,4-dienoate acylhydrolase	1.000000 H2O[c0] + 1.000000 2-Hydroxy-6-oxo-octa-2,4-dienoate[c0] <=> 1.000000 H+[c0] + 1.000000 Propionate[c0] + 1.000000 Oxopent-4-enoate[c0]	1.000000 M_cpd00001_c0 + 1.000000 M_cpd04393_c0 <=> 1.000000 M_cpd00067_c0 + 1.000000 M_cpd00141_c0 + 1.000000 M_cpd00461_c0		0	0	0	0	0	0	0	0	0	0	0	0
R_rxn03762_c0	R05465	1.000000 Glyceraldehyde3-phosphate[c0] + 1.000000 L-Arginine[c0] <=> 1.000000 H+[c0] + 1.000000 Phosphate[c0] + 1.000000 L-N2-(2-Carboxyethyl)arginine[c0]	1.000000 M_cpd00102_c0 + 1.000000 M_cpd00051_c0 <=> 1.000000 M_cpd00067_c0 + 1.000000 M_cpd00009_c0 + 1.000000 M_cpd04058_c0		0	0	0	0	0	0	0	0	0	0	0	0
R_rxn03816_c0	dTDP-4-oxo-2,6-dideoxy-D-glucose 5-epimerase	1.000000 dTDP-4-oxo-2,6-dideoxy-alpha-D-glucose[c0] <=> 1.000000 dTDP-4-oxo-2,6-dideoxy-L-glucose[c0]	1.000000 M_cpd04025_c0 <=> 1.000000 M_cpd04026_c0		0	0	0	0	0	0	0	0	0	0	0	0
R_rxn03841_c0	4-amino-4-deoxychorismate pyruvate-lyase	1.000000 ADC[c0] => 1.000000 ABEE[c0] + 1.000000 H+[c0] + 1.000000 Pyruvate[c0]	1.000000 M_cpd08210_c0 => 1.000000 M_cpd00443_c0 + 1.000000 M_cpd00067_c0 + 1.000000 M_cpd00020_c0		0.0027	0.0027	0.0027	0.0027	0.0027	0.0027	0.0027	0.0027	0.0027	0.0027	0.000360471	0.00036047
R_rxn03842_c0	Ureidoglycine aminohydrolase	1.000000 H2O[c0] + 1.000000 Ureidoglycine[c0] <=> 1.000000 NH3[c0] + 1.000000 Ureidoglycolate[c0]	1.000000 M_cpd00001_c0 + 1.000000 M_cpd01419_c0 <=> 1.000000 M_cpd00013_c0 + 1.000000 M_cpd00465_c0		0	0	0	0	0	0	0	0	0	0	0	0
R_rxn03843_c0	Farnesyl diphosphate:Isopentenyl diphosphate farnesyl cistransferase	1.000000 Isopentenyldiphosphate[c0] + 1.000000 Farnesyldiphosphate[c0] => 1.000000 PPi[c0] + 1.000000 H+[c0] + 1.000000 trans,trans,cis-Geranylgeranyl diphosphate[c0]	1.000000 M_cpd00113_c0 + 1.000000 M_cpd00350_c0 => 1.000000 M_cpd00012_c0 + 1.000000 M_cpd00067_c0 + 1.000000 M_cpd08211_c0		0	0	0	0	0	0	0	0	0	0	0	0
R_rxn03848_c0	Biuret amidohydrolase	1.000000 H+[c0] + 1.000000 H2O[c0] + 1.000000 Biuret[c0] <=> 1.000000 CO2[c0] + 1.000000 NH3[c0] + 1.000000 Urea[c0]	1.000000 M_cpd00067_c0 + 1.000000 M_cpd00001_c0 + 1.000000 M_cpd03963_c0 <=> 1.000000 M_cpd00011_c0 + 1.000000 M_cpd00013_c0 + 1.000000 M_cpd00073_c0		0	0	0	0	0	0	0	0	0	0	0	0
R_rxn03849_c0	biuret amidohydrolase	1.000000 H2O[c0] + 1.000000 Biuret[c0] <=> 1.000000 NH3[c0] + 1.000000 Allophanate[c0]	1.000000 M_cpd00001_c0 + 1.000000 M_cpd03963_c0 <=> 1.000000 M_cpd00013_c0 + 1.000000 M_cpd00742_c0		0	0	0	0	0	0	0	0	0	0	0	0
R_rxn03873_c0	R05594	2.000000 H2O[c0] + 1.000000 6-Ketoxycyclohex-1-ene-1-carboxyl-CoA[c0] <=> 1.000000 H+[c0] + 1.000000 3-Hydroxypimelyl-CoA[c0]	2.000000 M_cpd00001_c0 + 1.000000 M_cpd06713_c0 <=> 1.000000 M_cpd00067_c0 + 1.000000 M_cpd04103_c0		0	0	0	0	0	0	0	0	0	0	0	0
R_rxn03884_c0	2-dehydro-3-deoxy-D-gluconate-6-phosphate D-glyceraldehyde-3-phosphate-lyase	1.000000 2-Keto-3-deoxy-6-phosphogluconate[c0] <=> 1.000000 Pyruvate[c0] + 1.000000 Glyceraldehyde3-phosphate[c0]	1.000000 M_cpd02711_c0 <=> 1.000000 M_cpd00020_c0 + 1.000000 M_cpd00102_c0		0	13.9976	0	8.32544	0	8.88547	0	131.806	0	124.27	0	10.4696
R_rxn03887_c0	galactarate hydro-lyase (5-dehydro-4-deoxy-D-glucarate-forming)	1.000000 D-Mucic acid[c0] => 1.000000 H2O[c0] + 1.000000 5-Dehydro-4-deoxy-D-glucarate[c0]	1.000000 M_cpd00652_c0 => 1.000000 M_cpd00001_c0 + 1.000000 M_cpd00515_c0		0	0	0	0	0	0	0	0	0	0	0	0
R_rxn03891_c0	R05612	1.000000 Isopentenyldiphosphate[c0] + 1.000000 all-trans-Hexaprenyl diphosphate[c0] => 1.000000 PPi[c0] + 1.000000 H+[c0] + 1.000000 all-trans-Heptaprenyl diphosphate[c0]	1.000000 M_cpd00113_c0 + 1.000000 M_cpd00906_c0 => 1.000000 M_cpd00012_c0 + 1.000000 M_cpd00067_c0 + 1.000000 M_cpd02590_c0		0.0018	0.0018	0.0018	0.0018	0.0018	0.0018	0.0018	0.0018	0.0018	0.114748	0.000240314	0.000240314
R_rxn03892_c0	R05613	1.000000 Isopentenyldiphosphate[c0] + 1.000000 pendp[c0] => 1.000000 PPi[c0] + 1.000000 H+[c0] + 1.000000 all-trans-Hexaprenyl diphosphate[c0]	1.000000 M_cpd00113_c0 + 1.000000 M_cpd02591_c0 => 1.000000 M_cpd00012_c0 + 1.000000 M_cpd00067_c0 + 1.000000 M_cpd00906_c0		0.0018	0.0018	0.0018	0.0018	0.0018	0.0018	0.0018	0.0018	0.0018	0.114748	0.000240314	0.000240314
R_rxn03893_c0	all-trans-octaprenyl-diphosphate:4-hydroxybenzoate 3-octaprenyltransferase	1.000000 Farnesylfarnesylgeraniol[c0] + 1.000000 4-Hydroxybenzoate[c0] => 1.000000 PPi[c0] + 1.000000 H+[c0] + 1.000000 3-Octaprenyl-4-hydroxybenzoate[c0]	1.000000 M_cpd02557_c0 + 1.000000 M_cpd00136_c0 => 1.000000 M_cpd00012_c0 + 1.000000 M_cpd00067_c0 + 1.000000 M_cpd03443_c0		0	-5e-10	0	-4e-10	0	-4e-10	0	-4e-10	0	0.112948	0	1e-10
R_rxn03901_c0	undecaprenyl-diphosphate phosphohydrolase	1.000000 H2O[c0] + 1.000000 Bactoprenyl diphosphate[c0] => 2.000000 H+[c0] + 1.000000 Phosphate[c0] + 1.000000 Undecaprenylphosphate[c0]	1.000000 M_cpd00001_c0 + 1.000000 M_cpd02229_c0 => 2.000000 M_cpd00067_c0 + 1.000000 M_cpd00009_c0 + 1.000000 M_cpd00286_c0		0.0147807	0.0147807	0.0147807	0.0147807	0.0147807	0.0147807	0.0147807	0.0147807	0.0147807	0.0147807	0.00197333	0.00197333
R_rxn03902_c0	UDPMurAc(oyl-L-Ala-D-gamma-Glu-L-Lys-D-Ala-D-Ala):undecaprenyl-	1 Undecaprenylphosphate[c0] + 1 UDP-N-acetylmuramoyl-L-alanyl-D-glutamyl-L-lysyl-D-alanyl-D-alanine[c0] <=> 1 UMP[c0] + 1 N-acetylmuramoyl-L-alanyl-D-glutamyl-L-lysyl-D-alanyl-D-alanine-diphosphoundecaprenol[c0]	1 M_cpd00286_c0 + 1 M_cpd02943_c0 <=> 1 M_cpd00091_c0 + 1 M_cpd03486_c0		0	0	0	0	0	0	0	0	0	0	0	0
R_rxn03903_c0	UDPMurAc(oyl-L-Ala-D-gamma-Glu-L-Lys-D-Ala-D-Ala):undecaprenyl-phosphate phospho-N-acetylmuramoyl-pentapeptide-transferase	1.000000 Undecaprenylphosphate[c0] + 1.000000 UDPMurAc(oyl-L-Ala-D-gamma-Glu-L-Lys-D-Ala-D-Ala)[c0] <=> 1.000000 UMP[c0] + 1.000000 MurAc(oyl-L-Ala-D-gamma-Glu-L-Lys-D-Ala-D-Ala)-diphospho- undecaprenol[c0]	1.000000 M_cpd00286_c0 + 1.000000 M_cpd02862_c0 <=> 1.000000 M_cpd00091_c0 + 1.000000 M_cpd02948_c0		0	0	0	0	0	0	0	0	0	0	0	0
R_rxn03904_c0	UDP-N-acetylmuramoyl-L-alanyl-gamma-D-glutamyl-meso-2,6-diaminopimeloyl-D-alanyl-D-alanine:undecaprenyl-phosphate phospho-N-acetylmuramoyl-pentapeptide-transferase	1.000000 Undecaprenylphosphate[c0] + 1.000000 UDP-N-acetylmuramoyl-L-alanyl-D-glutamyl-6-carboxy-L-lysyl-D-alanyl- D-alanine[c0] <=> 1.000000 Undecaprenyl-diphospho-N-acetylmuramoyl-L-alanyl-D-glutamyl-meso-2-6-diaminopimeloyl-D-alanyl-D-alanine[c0] + 1.000000 UMP[c0]	1.000000 M_cpd00286_c0 + 1.000000 M_cpd02968_c0 <=> 1.000000 M_cpd03494_c0 + 1.000000 M_cpd00091_c0		0.0147807	0.0147807	0.0147807	0.0147807	0.0147807	0.0147807	0.0147807	0.0147807	0.0147807	0.0147807	0.00197333	0.00197333
R_rxn03907_c0	CTP: 2-C-Methyl-D-erythritol 4-phosphate cytidylyltransferase	1.000000 CTP[c0] + 1.000000 2-C-methyl-D-erythritol4-phosphate[c0] <=> 1.000000 PPi[c0] + 1.000000 4--cytidine5-diphospho-2-C-methyl-D-erythritol[c0]	1.000000 M_cpd00052_c0 + 1.000000 M_cpd08286_c0 <=> 1.000000 M_cpd00012_c0 + 1.000000 M_cpd08287_c0		0.0943637	0.0943637	0.0943637	0.0943637	0.0943637	0.0943637	0.0943637	0.0943637	0.0943637	0.997947	0.0125983	0.0125983
R_rxn03908_c0	ATP:4-(Cytidine 5'-diphospho)-2-C-methyl-D-erythritol 2-phosphotransferase	1.000000 ATP[c0] + 1.000000 4--cytidine5-diphospho-2-C-methyl-D-erythritol[c0] <=> 1.000000 H+[c0] + 1.000000 ADP[c0] + 1.000000 2-phospho-4--cytidine5-diphospho-2-C-methyl-D-erythritol[c0]	1.000000 M_cpd00002_c0 + 1.000000 M_cpd08287_c0 <=> 1.000000 M_cpd00067_c0 + 1.000000 M_cpd00008_c0 + 1.000000 M_cpd08288_c0		0.0943637	0.0943637	0.0943637	0.0943637	0.0943637	0.0943637	0.0943637	0.0943637	0.0943637	0.997947	0.0125983	0.0125983
R_rxn03909_c0	1-Deoxy-D-xylulose-5-phosphate pyruvate-lyase (carboxylating)	1.000000 H+[c0] + 1.000000 Pyruvate[c0] + 1.000000 Glyceraldehyde3-phosphate[c0] => 1.000000 CO2[c0] + 1.000000 1-deoxy-D-xylulose5-phosphate[c0]	1.000000 M_cpd00067_c0 + 1.000000 M_cpd00020_c0 + 1.000000 M_cpd00102_c0 => 1.000000 M_cpd00011_c0 + 1.000000 M_cpd08289_c0		0.0952637	0.0952637	0.0952637	0.0952637	0.0952637	0.0952637	0.0952637	0.0952637	0.0952637	0.998847	0.0127184	0.0127184
R_rxn03910_c0	2-Phospho-4-(cytidine 5'-diphospho)-2-C-methyl-D-erythritol CMP-lyase (cyclizing)	1.000000 2-phospho-4--cytidine5-diphospho-2-C-methyl-D-erythritol[c0] <=> 1.000000 CMP[c0] + 1.000000 2-C-methyl-D-erythritol2-4-cyclodiphosphate[c0]	1.000000 M_cpd08288_c0 <=> 1.000000 M_cpd00046_c0 + 1.000000 M_cpd08301_c0		0.0943637	0.0943637	0.0943637	0.0943637	0.0943637	0.0943637	0.0943637	0.0943637	0.0943637	0.997947	0.0125983	0.0125983
R_rxn03915_c0	2-formylbenzoate:NAD+ oxidoreductase	1.000000 H2O[c0] + 1.000000 NAD[c0] + 1.000000 o-Formylbenzoic acid[c0] <=> 2.000000 H+[c0] + 1.000000 NADH[c0] + 1.000000 Phthalate[c0]	1.000000 M_cpd00001_c0 + 1.000000 M_cpd00003_c0 + 1.000000 M_cpd01956_c0 <=> 2.000000 M_cpd00067_c0 + 1.000000 M_cpd00004_c0 + 1.000000 M_cpd01129_c0		0	0	0	0	0	0	0	0	0	0	0	0
R_rxn03916_c0	ATP:D-glycero-beta-D-manno-heptose 1-phosphate adenylyltransferase	1.000000 ATP[c0] + 1.000000 D-Glycero-D-manno-heptose1-phosphate[c0] => 1.000000 PPi[c0] + 1.000000 ADP-D-glycero-D-manno-heptose[c0]	1.000000 M_cpd00002_c0 + 1.000000 M_cpd04920_c0 => 1.000000 M_cpd00012_c0 + 1.000000 M_cpd03830_c0		0.00223104	0.00223104	0.00223104	0.00223104	0.00223104	0.00223104	0.00223104	0.00223104	0.00223104	0.00223104	0.000297862	0.000297852
R_rxn03917_c0	D-glycero-beta-D-manno-heptose-7-phosphate aldose-ketose-isomerase	1.000000 Sedoheptulose7-phosphate[c0] => 1.000000 D-Glycero-D-manno-heptose7-phosphate[c0]	1.000000 M_cpd00238_c0 => 1.000000 M_cpd04918_c0		0.00223104	0.00223104	0.00223104	0.00223104	0.00223104	0.00223104	0.00223104	0.00223104	0.00223104	0.00223104	0.000297862	0.000297852
R_rxn03918_c0	ATP:D-glycero-beta-D-manno-heptose 7-phosphate 1-phosphotransferase	1.000000 ATP[c0] + 1.000000 D-Glycero-D-manno-heptose7-phosphate[c0] => 1.000000 H+[c0] + 1.000000 ADP[c0] + 1.000000 D-Glycero-D-manno-heptose1-7-bisphosphate[c0]	1.000000 M_cpd00002_c0 + 1.000000 M_cpd04918_c0 => 1.000000 M_cpd00067_c0 + 1.000000 M_cpd00008_c0 + 1.000000 M_cpd08316_c0		0.00223104	0.00223104	0.00223104	0.00223104	0.00223104	0.00223104	0.00223104	0.00223104	0.00223104	0.00223104	0.000297862	0.000297852
R_rxn03919_c0	D-glycero-beta-D-manno-heptose 1,7-bisphosphate 7-phosphohydrolase	1.000000 H2O[c0] + 1.000000 D-Glycero-D-manno-heptose1-7-bisphosphate[c0] => 1.000000 Phosphate[c0] + 1.000000 D-Glycero-D-manno-heptose1-phosphate[c0]	1.000000 M_cpd00001_c0 + 1.000000 M_cpd08316_c0 => 1.000000 M_cpd00009_c0 + 1.000000 M_cpd04920_c0		0.00223104	0.00223104	0.00223104	0.00223104	0.00223104	0.00223104	0.00223104	0.00223104	0.00223104	0.00223104	0.000297862	0.000297852
R_rxn03921_c0	R05649	1.000000 H2O[c0] + 1.000000 NAD[c0] + 1.000000 1-Hydroxy-2-naphthaldehyde[c0] <=> 2.000000 H+[c0] + 1.000000 NADH[c0] + 1.000000 1-Hydroxy-2-naphthoate[c0]	1.000000 M_cpd00001_c0 + 1.000000 M_cpd00003_c0 + 1.000000 M_cpd08279_c0 <=> 2.000000 M_cpd00067_c0 + 1.000000 M_cpd00004_c0 + 1.000000 M_cpd02045_c0		0	0	0	0	0	0	0	0	0	0	0	0
R_rxn03923_c0	acetyl-phosphate:sulfite S-acetyltransferase (acyl-phosphate hydrolysing, 2-oxoethyl-forming)	1 Phosphate[c0] + 1 H+[c0] + 1 Sulfoacetaldehyde[c0] <=> 1 Sulfite[c0] + 1 Acetylphosphate[c0]	1 M_cpd00009_c0 + 1 M_cpd00067_c0 + 1 M_cpd00460_c0 <=> 1 M_cpd00081_c0 + 1 M_cpd00196_c0		-6.57307	-2.09281	-6.57307	-6.57307	-6.57307	-6.57307	-9.28184	-6.57307	-16.1286	-2.09281	-0.877557	-0.877557
R_rxn03933_c0	UDP-N-acetyl-D-glucosamine:N-acetyl-alpha-D-muramyl(oyl-L-Ala-gamma-D-Glu-L-Lys-D-Ala-D-Ala)-diphosphoundecaprenol 4-beta-N-acetylglucosaminlytransferase	1.000000 UDP-N-acetylglucosamine[c0] + 1.000000 MurAc(oyl-L-Ala-D-gamma-Glu-L-Lys-D-Ala-D-Ala)-diphospho- undecaprenol[c0] <=> 1.000000 UDP[c0] + 1.000000 Undecaprenyl-diphospho-N-acetylmuramoyl-(N-acetylglucosamine)-L-alanyl-gamma-D-glutamyl-L-lysyl-D-alanyl-D-alanine[c0]	1.000000 M_cpd00037_c0 + 1.000000 M_cpd02948_c0 <=> 1.000000 M_cpd00014_c0 + 1.000000 M_cpd03491_c0		0	0	0	0	0	0	0	0	0	0	0	0
R_rxn03951_c0	NAD-dependent threonine 4-phosphate dehydrogenase	1.000000 NAD[c0] + 1.000000 4-(Phosphonooxy)-threonine[c0] <=> 1.000000 H+[c0] + 1.000000 NADH[c0] + 1.000000 2-Amino-3-oxo-4-phosphonooxybutyrate[c0]	1.000000 M_cpd00003_c0 + 1.000000 M_cpd03607_c0 <=> 1.000000 M_cpd00067_c0 + 1.000000 M_cpd00004_c0 + 1.000000 M_cpd04539_c0		0	0	0	0	0	0	0	0	0	0	0	0
R_rxn03958_c0	1-Deoxy-D-xylulose-5-phosphate isomeroreductase	1.000000 NADP[c0] + 1.000000 2-C-methyl-D-erythritol4-phosphate[c0] <=> 1.000000 H+[c0] + 1.000000 1-deoxy-D-xylulose5-phosphate[c0] + 1.000000 NADPH[c0]	1.000000 M_cpd00006_c0 + 1.000000 M_cpd08286_c0 <=> 1.000000 M_cpd00067_c0 + 1.000000 M_cpd08289_c0 + 1.000000 M_cpd00005_c0		-0.0943637	-0.0943637	-0.0943637	-0.0943637	-0.0943637	-0.0943637	-0.0943637	-0.0943637	-0.997947	-0.0943637	-0.0125983	-0.0125983
R_rxn03962_c0	GDP-L-fucose:NADP+ 4-oxidoreductase (3,5-epimerizing)	1.000000 NADP[c0] + 1.000000 GDP-L-fucose[c0] <=> 1.000000 H+[c0] + 1.000000 GDP-4-dehydro-D-rhamnose[c0] + 1.000000 NADPH[c0]	1.000000 M_cpd00006_c0 + 1.000000 M_cpd00272_c0 <=> 1.000000 M_cpd00067_c0 + 1.000000 M_cpd00900_c0 + 1.000000 M_cpd00005_c0		0	0	0	0	0	0	0	0	0	0	0	0
R_rxn03970_c0	Coniferyl aldehyde:NAD oxidoreductase	1.000000 H2O[c0] + 1.000000 NAD[c0] + 1.000000 Ferulaldehyde[c0] => 2.000000 H+[c0] + 1.000000 NADH[c0] + 1.000000 Ferulate[c0]	1.000000 M_cpd00001_c0 + 1.000000 M_cpd00003_c0 + 1.000000 M_cpd01733_c0 => 2.000000 M_cpd00067_c0 + 1.000000 M_cpd00004_c0 + 1.000000 M_cpd01059_c0		0	0	0	0	0	0	0	0	0	0	0	0
R_rxn03974_c0	FMNH2:NAD+ oxidoreductase	1.0 FMNH2[c0] + 1.0 NAD[c0] <=> 1.0 FMN[c0] + 1.0 NADH[c0] + 1.0 H+[c0]	1.0 M_cpd01270_c0 + 1.0 M_cpd00003_c0 <=> 1.0 M_cpd00050_c0 + 1.0 M_cpd00004_c0 + 1.0 M_cpd00067_c0		-6.57307	-2.09281	-6.57307	-6.57307	-6.57307	-6.57307	-9.28184	-6.57307	-16.1286	-2.09281	-0.877557	-0.877557
R_rxn04018_c0	geranyl-diphosphate diphosphate-lyase [cyclizing, (-)-alpha-pinene-forming]	1 Geranyldiphosphate[c0] <=> 1 PPi[c0] + 1 alpha-Pinene[c0]	1 M_cpd00283_c0 <=> 1 M_cpd00012_c0 + 1 M_cpd03749_c0		0	0	0	0	0	0	0	0	0	0	0	0
R_rxn04052_c0	R05814	2.000000 H+[c0] + 1.000000 Cobalt-precorrin 8[c0] <=> 1.000000 Cobyrinate[c0]	2.000000 M_cpd00067_c0 + 1.000000 M_cpd08375_c0 <=> 1.000000 M_cpd03421_c0		0	0	0	0	0	0	0	0	0	0	0	0
R_rxn04053_c0	rxn04053	2 H2O[c0] + 2 ATP[c0] + 2 L-Glutamine[c0] + 1 Cobyrinate[c0] <=> 2 L-Glutamate[c0] + 1 Cob(II)yrinate diamide[c0]	2 M_cpd00001_c0 + 2 M_cpd00002_c0 + 2 M_cpd00053_c0 + 1 M_cpd03421_c0 <=> 2 M_cpd00023_c0 + 1 M_cpd03914_c0		0	0	0	0	0	0	0	0	0	0	0	0
R_rxn04068_c0	Glycocholate amidohydrolase	1.000000 H2O[c0] + 1.000000 Glycocholate[c0] <=> 1.000000 Glycine[c0] + 1.000000 Cholate[c0]	1.000000 M_cpd00001_c0 + 1.000000 M_cpd01318_c0 <=> 1.000000 M_cpd00033_c0 + 1.000000 M_cpd00526_c0		0	0	0	0	0	0	0	0	0	0	0	0
R_rxn04070_c0	pyridoxine 5'-phosphate synthase	1.000000 1-deoxy-D-xylulose5-phosphate[c0] + 1.000000 3-Amino-2-oxopropyl phosphate[c0] => 1.000000 H+[c0] + 1.000000 Phosphate[c0] + 2.000000 H2O[c0] + 1.000000 Pyridoxine phosphate[c0]	1.000000 M_cpd08289_c0 + 1.000000 M_cpd08449_c0 => 1.000000 M_cpd00067_c0 + 1.000000 M_cpd00009_c0 + 2.000000 M_cpd00001_c0 + 1.000000 M_cpd00478_c0		0.0009	0.0009	0.0009	0.0009	0.0009	0.0009	0.0009	0.0009	0.0009	0.0009	0.000120157	0.000120157
R_rxn04082_c0	L-ribulose-5-phosphate 4-epimerase	1 L-ribulose-5-phosphate[c0] <=> 1 D-Xylulose5-phosphate[c0]	1 M_cpd00808_c0 <=> 1 M_cpd00198_c0		0	0	0	0	0	0	0	0	0	0	0	0
R_rxn04113_c0	isopentenyl-diphosphate:NAD(P)+ oxidoreductase	1.000000 H+[c0] + 1.000000 NADPH[c0] + 1.000000 1-Hydroxy-2-methyl-2-butenyl 4-diphosphate[c0] => 1.000000 H2O[c0] + 1.000000 Isopentenyldiphosphate[c0] + 1.000000 NADP[c0]	1.000000 M_cpd00067_c0 + 1.000000 M_cpd00005_c0 + 1.000000 M_cpd08615_c0 => 1.000000 M_cpd00001_c0 + 1.000000 M_cpd00113_c0 + 1.000000 M_cpd00006_c0		0	0.0943637	0	0.0943637	0	0.0943637	0	0.0943637	0	0.997947	0	0.0125983
R_rxn04132_c0	R06063	1.000000 H2O[c0] + 1.000000 5-Hydroxyisourate[c0] => 1.000000 H+[c0] + 1.000000 CO2[c0] + 1.000000 (R)-Allantoin[c0]	1.000000 M_cpd00001_c0 + 1.000000 M_cpd08625_c0 => 1.000000 M_cpd00067_c0 + 1.000000 M_cpd00011_c0 + 1.000000 M_cpd01567_c0		0	0	0	0	0	0	0	0	0	0	0	0
R_rxn04133_c0	R06064	1.000000 H2O[c0] + 1.000000 5-Hydroxyisourate[c0] => 1.000000 H+[c0] + 1.000000 CO2[c0] + 1.000000 Allantoin[c0]	1.000000 M_cpd00001_c0 + 1.000000 M_cpd08625_c0 => 1.000000 M_cpd00067_c0 + 1.000000 M_cpd00011_c0 + 1.000000 M_cpd01092_c0		0	0	0	0	0	0	0	0	0	0	0	0
R_rxn04139_c0	2-Octaprenyl-3-methyl-6-methoxy-1,4-benzoquinone ,NADPH2:oxygen oxidoreductase	1.000000 H+[c0] + 1.000000 NADPH[c0] + 1.000000 O2[c0] + 1.000000 2-Octaprenyl-3-methyl-6-methoxy-1,4-benzoquinone[c0] => 1.000000 H2O[c0] + 1.000000 NADP[c0] + 1.000000 2-Octaprenyl-3-methyl-5-hydroxy-6-methoxy-1,4-benzoquinone[c0]	1.000000 M_cpd00067_c0 + 1.000000 M_cpd00005_c0 + 1.000000 M_cpd00007_c0 + 1.000000 M_cpd03448_c0 => 1.000000 M_cpd00001_c0 + 1.000000 M_cpd00006_c0 + 1.000000 M_cpd03449_c0		0	-5e-10	0	-4e-10	0	-4e-10	0	-4e-10	0	0.112948	0	1e-10
R_rxn04140_c0	methylamine:oxygen oxidoreductase (deaminating) (copper-containing)	1 H2O[c0] + 1 O2[c0] + 1 Methanamine[c0] => 1 NH3[c0] + 1 H2O2[c0] + 1 Formaldehyde[c0]	1 M_cpd00001_c0 + 1 M_cpd00007_c0 + 1 M_cpd00187_c0 => 1 M_cpd00013_c0 + 1 M_cpd00025_c0 + 1 M_cpd00055_c0		0	0	0	0	0	0	0	0	0	0	0	0
R_rxn04238_c0	R06371	1.000000 H2O[c0] + 1.000000 4-Isopropenyl-2-oxy-cyclohexanecarboxyl-CoA[c0] <=> 1.000000 H+[c0] + 1.000000 3-Isopropenylpimelyl-CoA[c0]	1.000000 M_cpd00001_c0 + 1.000000 M_cpd08732_c0 <=> 1.000000 M_cpd00067_c0 + 1.000000 M_cpd08733_c0		0	0	0	0	0	0	0	0	0	0	0	0
R_rxn04269_c0	alpha-Pinene monooxygenase	1 NADH[c0] + 1 O2[c0] + 1 H+[c0] + 1 alpha-Pinene[c0] <=> 1 H2O[c0] + 1 NAD[c0] + 1 alpha-Pinene-oxide[c0]	1 M_cpd00004_c0 + 1 M_cpd00007_c0 + 1 M_cpd00067_c0 + 1 M_cpd03749_c0 <=> 1 M_cpd00001_c0 + 1 M_cpd00003_c0 + 1 M_cpd01783_c0		0	0	0	0	0	0	0	0	0	0	0	0
R_rxn04270_c0	cis-2-Methyl-5-isopropylhexa-2,5-dienal dehydrogenase	1.000000 H2O[c0] + 1.000000 NAD[c0] + 1.000000 cis-2-Methyl-5-isopropylhexa-2,5-dienal[c0] <=> 2.000000 H+[c0] + 1.000000 NADH[c0] + 1.000000 cis-2-Methyl-5-isopropylhexa-2,5-dienoic acid[c0]	1.000000 M_cpd00001_c0 + 1.000000 M_cpd00003_c0 + 1.000000 M_cpd02708_c0 <=> 2.000000 M_cpd00067_c0 + 1.000000 M_cpd00004_c0 + 1.000000 M_cpd08741_c0		0	0	0	0	0	0	0	0	0	0	0	0
R_rxn04271_c0	trans-2-Methyl-5-isopropylhexa-2,5-dienal dehydrogenase	1.000000 H2O[c0] + 1.000000 NAD[c0] + 1.000000 trans-2-Methyl-5-isopropylhexa-2,5-dienal[c0] <=> 2.000000 H+[c0] + 1.000000 NADH[c0] + 1.000000 trans-2-Methyl-5-isopropylhexa-2,5-dienoic acid[c0]	1.000000 M_cpd00001_c0 + 1.000000 M_cpd00003_c0 + 1.000000 M_cpd08739_c0 <=> 2.000000 M_cpd00067_c0 + 1.000000 M_cpd00004_c0 + 1.000000 M_cpd08740_c0		0	0	0	0	0	0	0	0	0	0	0	0
R_rxn04384_c0	adenosylcobyric acid:(R)-1-aminopropan-2-yl phosphate ligase	1.000000 ATP[c0] + 1.000000 (R)-1-Aminopropan-2-yl phosphate[c0] + 1.000000 Adenosylcobyric acid[c0] <=> 1.000000 H+[c0] + 1.000000 ADP[c0] + 1.000000 Phosphate[c0] + 1.000000 Adenosyl cobinamide phosphate[c0]	1.000000 M_cpd00002_c0 + 1.000000 M_cpd02547_c0 + 1.000000 M_cpd03917_c0 <=> 1.000000 M_cpd00067_c0 + 1.000000 M_cpd00008_c0 + 1.000000 M_cpd00009_c0 + 1.000000 M_cpd03919_c0		0	0	0	0	0	0	0	0	0	0	0	0
R_rxn04385_c0	L-threonine-O-3-phosphate carboxy-lyase	1.000000 H+[c0] + 1.000000 L-Threonine phosphate[c0] => 1.000000 CO2[c0] + 1.000000 (R)-1-Aminopropan-2-yl phosphate[c0]	1.000000 M_cpd00067_c0 + 1.000000 M_cpd08928_c0 => 1.000000 M_cpd00011_c0 + 1.000000 M_cpd02547_c0		0	0	0	0	0	0	0	0	0	0	0	0
R_rxn04453_c0	5-hydroxyisourate amidohydrolase	1.000000 H2O[c0] + 1.000000 5-Hydroxyisourate[c0] => 1.000000 H+[c0] + 1.000000 5-Hydroxy-2-oxo-4-ureido-2,5-dihydro-1H-imidazole-5-carboxylate[c0]	1.000000 M_cpd00001_c0 + 1.000000 M_cpd08625_c0 => 1.000000 M_cpd00067_c0 + 1.000000 M_cpd09027_c0		0	0	0	0	0	0	0	0	0	0	0	0
R_rxn04454_c0	isochorismate pyruvate-lyase (salicylate-forming)	1.000000 Isochorismate[c0] => 1.000000 Pyruvate[c0] + 1.000000 SALC[c0]	1.000000 M_cpd00658_c0 => 1.000000 M_cpd00020_c0 + 1.000000 M_cpd00599_c0		0	0	0	0	0	0	0	0	0	0	0	0
R_rxn04457_c0	R06605	1.000000 5-Hydroxy-2-oxo-4-ureido-2,5-dihydro-1H-imidazole-5-carboxylate[c0] => 1.000000 CO2[c0] + 1.000000 (R)-Allantoin[c0]	1.000000 M_cpd09027_c0 => 1.000000 M_cpd00011_c0 + 1.000000 M_cpd01567_c0		0	0	0	0	0	0	0	0	0	0	0	0
R_rxn04596_c0	R06781	1 (E)-Cinnamate[c0] => 1 3-Coumaric acid[c0]	1 M_cpd00333_c0 => 1 M_cpd09252_c0		0	0	0	0	0	0	0	0	0	0	0	0
R_rxn04602_c0	(2E)-3-(3-hydroxyphenyl)prop-2-enoate,NADH:oxygen oxidoreductase (2-hydroxylating)	1 NADH[c0] + 1 O2[c0] + 1 H+[c0] + 1 3-Coumaric acid[c0] => 1 H2O[c0] + 1 NAD[c0] + 1 2,3-dihydroxicinnamic acid[c0]	1 M_cpd00004_c0 + 1 M_cpd00007_c0 + 1 M_cpd00067_c0 + 1 M_cpd09252_c0 => 1 M_cpd00001_c0 + 1 M_cpd00003_c0 + 1 M_cpd09254_c0		0	0	0	0	0	0	0	0	0	0	0	0
R_rxn04603_c0	R06788	1 O2[c0] + 1 2,3-dihydroxicinnamic acid[c0] => 1 H+[c0] + 1 2-Hydroxy-6-ketononatrienedioate[c0]	1 M_cpd00007_c0 + 1 M_cpd09254_c0 => 1 M_cpd00067_c0 + 1 M_cpd09255_c0		0	0	0	0	0	0	0	0	0	0	0	0
R_rxn04604_c0	R06789	1.000000 H2O[c0] + 1.000000 2-Hydroxy-6-ketononatrienedioate[c0] => 1.000000 H+[c0] + 1.000000 Fumarate[c0] + 1.000000 Oxopent-4-enoate[c0]	1.000000 M_cpd00001_c0 + 1.000000 M_cpd09255_c0 => 1.000000 M_cpd00067_c0 + 1.000000 M_cpd00106_c0 + 1.000000 M_cpd00461_c0		0	0	0	0	0	0	0	0	0	0	0	0
R_rxn04658_c0	RXN-5183.c	1.000000 H+[c0] + 1.000000 NADPH[c0] + 1.000000 N2-Acetyl-L-aminoadipyl-delta-phosphate[c0] => 1.000000 Phosphate[c0] + 1.000000 NADP[c0] + 1.000000 N2-Acetyl-L-aminoadipate semialdehyde[c0]	1.000000 M_cpd00067_c0 + 1.000000 M_cpd00005_c0 + 1.000000 M_cpd09350_c0 => 1.000000 M_cpd00009_c0 + 1.000000 M_cpd00006_c0 + 1.000000 M_cpd09351_c0		0	0	0	0	0	0	0	0	0	0	0	0
R_rxn04675_c0	menaquinone biosynthesis protein-related	1.000000 H+[c0] + 1.000000 Isochorismate[c0] + 1.000000 2-Oxoglutarate[c0] => 1.000000 Pyruvate[c0] + 1.000000 CO2[c0] + 1.000000 SHCHC[c0]	1.000000 M_cpd00067_c0 + 1.000000 M_cpd00658_c0 + 1.000000 M_cpd00024_c0 => 1.000000 M_cpd00020_c0 + 1.000000 M_cpd00011_c0 + 1.000000 M_cpd03451_c0		0.0018	0.0018	0.0018	0.0018	0.0018	0.0018	0.0018	0.0018	0.0018	0.0018	0.000240314	0.000240314
R_rxn04704_c0	coproporphyrinogen-III:S-adenosyl-L-methionine oxidoreductase(decarboxylating)	2.000000 S-Adenosyl-L-methionine[c0] + 1.000000 CoproporphyrinogenIII[c0] <=> 2.000000 L-Methionine[c0] + 2.000000 5'-Deoxyadenosine[c0] + 2.000000 CO2[c0] + 1.000000 ProtoporphyrinogenIX[c0]	2.000000 M_cpd00017_c0 + 1.000000 M_cpd02083_c0 <=> 2.000000 M_cpd00060_c0 + 2.000000 M_cpd03091_c0 + 2.000000 M_cpd00011_c0 + 1.000000 M_cpd00791_c0		0	0	0	0	0	0	0	0	0	0	0	0
R_rxn04712_c0	R06903	1.000000 Fumarate[c0] + 1.000000 2-Methylnaphthalene[c0] => 1.000000 Naphthyl-2-methyl-succinic acid[c0]	1.000000 M_cpd00106_c0 + 1.000000 M_cpd09801_c0 => 1.000000 M_cpd09818_c0		0	0	0	0	0	0	0	0	0	0	0	0
R_rxn04723_c0	R06914	1.000000 H2O[c0] + 1.000000 NAD[c0] + 1.000000 3-Methylsalicylaldehyde[c0] <=> 2.000000 H+[c0] + 1.000000 NADH[c0] + 1.000000 3-Methylsalicylate[c0]	1.000000 M_cpd00001_c0 + 1.000000 M_cpd00003_c0 + 1.000000 M_cpd09790_c0 <=> 2.000000 M_cpd00067_c0 + 1.000000 M_cpd00004_c0 + 1.000000 M_cpd09791_c0		0	0	0	0	0	0	0	0	0	0	0	0
R_rxn04726_c0	1-hydroxymethylnaphthalene:NAD+ oxidoreductase	1.000000 NAD[c0] + 1.000000 1-Naphthalenemethanol[c0] <=> 1.000000 H+[c0] + 1.000000 NADH[c0] + 1.000000 1-Naphthaldehyde[c0]	1.000000 M_cpd00003_c0 + 1.000000 M_cpd09792_c0 <=> 1.000000 M_cpd00067_c0 + 1.000000 M_cpd00004_c0 + 1.000000 M_cpd09793_c0		0	0	0	0	0	0	0	0	0	0	0	0
R_rxn04727_c0	R06918	1.000000 H2O[c0] + 1.000000 NAD[c0] + 1.000000 1-Naphthaldehyde[c0] <=> 2.000000 H+[c0] + 1.000000 NADH[c0] + 1.000000 1-Naphthoic acid[c0]	1.000000 M_cpd00001_c0 + 1.000000 M_cpd00003_c0 + 1.000000 M_cpd09793_c0 <=> 2.000000 M_cpd00067_c0 + 1.000000 M_cpd00004_c0 + 1.000000 M_cpd09794_c0		0	0	0	0	0	0	0	0	0	0	0	0
R_rxn04736_c0	(2-naphthyl)methanol:NAD+ oxidoreductase	1.000000 NAD[c0] + 1.000000 (2-Naphthyl)methanol[c0] <=> 1.000000 H+[c0] + 1.000000 NADH[c0] + 1.000000 2-Naphthaldehyde[c0]	1.000000 M_cpd00003_c0 + 1.000000 M_cpd01859_c0 <=> 1.000000 M_cpd00067_c0 + 1.000000 M_cpd00004_c0 + 1.000000 M_cpd09802_c0		0	0	0	0	0	0	0	0	0	0	0	0
R_rxn04737_c0	R06928	1.000000 H2O[c0] + 1.000000 NAD[c0] + 1.000000 2-Naphthaldehyde[c0] <=> 2.000000 H+[c0] + 1.000000 NADH[c0] + 1.000000 2-Naphthoic acid[c0]	1.000000 M_cpd00001_c0 + 1.000000 M_cpd00003_c0 + 1.000000 M_cpd09802_c0 <=> 2.000000 M_cpd00067_c0 + 1.000000 M_cpd00004_c0 + 1.000000 M_cpd09804_c0		0	0	0	0	0	0	0	0	0	0	0	0
R_rxn04744_c0	R06935	1.000000 H2O[c0] + 1.000000 NAD[c0] + 1.000000 4-Hydroxymethylsalicylaldehyde[c0] <=> 2.000000 H+[c0] + 1.000000 NADH[c0] + 1.000000 4-Hydroxymethylsalicylate[c0]	1.000000 M_cpd00001_c0 + 1.000000 M_cpd00003_c0 + 1.000000 M_cpd09811_c0 <=> 2.000000 M_cpd00067_c0 + 1.000000 M_cpd00004_c0 + 1.000000 M_cpd09812_c0		0	0	0	0	0	0	0	0	0	0	0	0
R_rxn04783_c0	glycinamide ribonucleotide transformylase	1.000000 ATP[c0] + 1.000000 Formate[c0] + 1.000000 GAR[c0] => 1.000000 H+[c0] + 1.000000 ADP[c0] + 1.000000 Phosphate[c0] + 1.000000 N-Formyl-GAR[c0]	1.000000 M_cpd00002_c0 + 1.000000 M_cpd00047_c0 + 1.000000 M_cpd02394_c0 => 1.000000 M_cpd00067_c0 + 1.000000 M_cpd00008_c0 + 1.000000 M_cpd00009_c0 + 1.000000 M_cpd02678_c0		0.0179735	0.0179735	0.0179735	0.0179735	0.0179735	0.0179735	0.0179735	0.0179735	0.0179735	0.0179735	0.0023996	0.0023996
R_rxn04789_c0	sulfoacetaldehyde:NAD+ oxidoreductase	1 H2O[c0] + 1 NAD[c0] + 1 Sulfoacetaldehyde[c0] => 1 NADH[c0] + 2 H+[c0] + 1 Sulfoacetate[c0]	1 M_cpd00001_c0 + 1 M_cpd00003_c0 + 1 M_cpd00460_c0 => 1 M_cpd00004_c0 + 2 M_cpd00067_c0 + 1 M_cpd09878_c0		2.09281	6.57307	6.57307	6.57307	6.57307	6.57307	6.57307	9.28184	2.09281	15.9036	0.877557	0.877557
R_rxn04790_c0	isethionate:ferricytochrome-c oxidoreductase	2 Cytochrome c3+[c0] + 1 Isethionate[c0] <=> 2 H+[c0] + 2 Cytochrome c2+[c0] + 1 Sulfoacetaldehyde[c0]	2 M_cpd00109_c0 + 1 M_cpd03048_c0 <=> 2 M_cpd00067_c0 + 2 M_cpd00110_c0 + 1 M_cpd00460_c0		2.27e-08	0	1.76e-08	0	1.76e-08	0	1.76e-08	0	-4.48027	0	-5.9e-09	0
R_rxn04794_c0	propanoyl-CoA:formate C-propanoyltransferase	1 CoA[c0] + 1 2-Oxobutyrate[c0] <=> 1 Formate[c0] + 1 Propionyl-CoA[c0]	1 M_cpd00010_c0 + 1 M_cpd00094_c0 <=> 1 M_cpd00047_c0 + 1 M_cpd00086_c0		0	0	0	0	0	0	0	0	0	0	0	0
R_rxn04908_c0	trichloroethanol:NAD+ oxidoreductase	1.000000 H+[c0] + 1.000000 NADH[c0] + 1.000000 Chloral hydrate[c0] <=> 1.000000 H2O[c0] + 1.000000 NAD[c0] + 1.000000 Trichloroethanol[c0]	1.000000 M_cpd00067_c0 + 1.000000 M_cpd00004_c0 + 1.000000 M_cpd04248_c0 <=> 1.000000 M_cpd00001_c0 + 1.000000 M_cpd00003_c0 + 1.000000 M_cpd04661_c0		0	0	0	0	0	0	0	0	0	0	0	0
R_rxn04954_c0	5-methyltetrahydrofolate:NAD+ oxidoreductase	1.000000 NAD[c0] + 1.000000 5-Methyltetrahydrofolate[c0] <=> 1.000000 H+[c0] + 1.000000 NADH[c0] + 1.000000 5-10-Methylenetetrahydrofolate[c0]	1.000000 M_cpd00003_c0 + 1.000000 M_cpd00345_c0 <=> 1.000000 M_cpd00067_c0 + 1.000000 M_cpd00004_c0 + 1.000000 M_cpd00125_c0		-0.0398063	-0.0398063	-0.0398063	-0.0398063	-0.0398063	-0.0398063	-0.0398063	-0.0398063	-0.37865	-0.0398063	-0.00531445	-0.00531445
R_rxn04996_c0	dimethyallyl diphosphate:NADP+ oxidoreductase	1.000000 H+[c0] + 1.000000 NADPH[c0] + 1.000000 1-Hydroxy-2-methyl-2-butenyl 4-diphosphate[c0] => 1.000000 H2O[c0] + 1.000000 NADP[c0] + 1.000000 DMAPP[c0]	1.000000 M_cpd00067_c0 + 1.000000 M_cpd00005_c0 + 1.000000 M_cpd08615_c0 => 1.000000 M_cpd00001_c0 + 1.000000 M_cpd00006_c0 + 1.000000 M_cpd00202_c0		0	0.0943637	0	0.0943637	0	0.0943637	0	0.0943637	0	0.997947	0	0.0125983
R_rxn05005_c0	S-adenosyl-L-methionine:uroporphyrinogen-III C-methyltransferase	1.000000 S-Adenosyl-L-methionine[c0] + 1.000000 UroporphyrinogenIII[c0] <=> 1.000000 H+[c0] + 1.000000 S-Adenosyl-homocysteine[c0] + 1.000000 Precorrin 1[c0]	1.000000 M_cpd00017_c0 + 1.000000 M_cpd00774_c0 <=> 1.000000 M_cpd00067_c0 + 1.000000 M_cpd00019_c0 + 1.000000 M_cpd11206_c0		0.0009	0.0009	0.0009	0.0009	0.0009	0.0009	0.0009	0.0009	0.0009	0.0009	0.000120157	0.000120157
R_rxn05006_c0	S-adenosyl-L-methionine:precorrin-1 C-methyltransferase	1.000000 S-Adenosyl-L-methionine[c0] + 1.000000 Precorrin 1[c0] <=> 1.000000 S-Adenosyl-homocysteine[c0] + 1.000000 Precorrin 2[c0]	1.000000 M_cpd00017_c0 + 1.000000 M_cpd11206_c0 <=> 1.000000 M_cpd00019_c0 + 1.000000 M_cpd01620_c0		0.0009	0.0009	0.0009	0.0009	0.0009	0.0009	0.0009	0.0009	0.0009	0.0009	0.000120157	0.000120157
R_rxn05012_c0	carbamoyl-phosphate:N2-acetyl-L-ornithine carbamoyltransferase	1.000000 N-Acetylornithine[c0] + 1.000000 Carbamoylphosphate[c0] => 1.000000 H+[c0] + 1.000000 Phosphate[c0] + 1.000000 N-Acetyl-L-citrulline[c0]	1.000000 M_cpd00342_c0 + 1.000000 M_cpd00146_c0 => 1.000000 M_cpd00067_c0 + 1.000000 M_cpd00009_c0 + 1.000000 M_cpd11209_c0		0	0	0	0	0	0	0	0	0	0	0	0
R_rxn05029_c0	ATP:cobinamide Cobeta-adenosyltransferase	1.000000 H+[c0] + 1.000000 ATP[c0] + 1.000000 Cobinamide[c0] <=> 1.000000 Triphosphate[c0] + 1.000000 Adenosyl cobinamide[c0]	1.000000 M_cpd00067_c0 + 1.000000 M_cpd00002_c0 + 1.000000 M_cpd03422_c0 <=> 1.000000 M_cpd00421_c0 + 1.000000 M_cpd03918_c0		0.0009	0.0009	0.0009	0.0009	0.0009	0.0009	0.0009	0.0009	0.0009	0.0009	0.000120157	0.000120157
R_rxn05031_c0	prephytoene diphosphate:geranylgeranyl-diphosphate geranylgeranyltransferase	1.000000 Prephytoene diphosphate[c0] => 1.000000 PPi[c0] + 1.000000 H+[c0] + 1.000000 Phytoene[c0]	1.000000 M_cpd02168_c0 => 1.000000 M_cpd00012_c0 + 1.000000 M_cpd00067_c0 + 1.000000 M_cpd03205_c0		0	0	0	0	0	0	0	0	0	0	0	0
R_rxn05034_c0	solanesyl-diphosphate:4-hydroxybenzoate nonaprenyltransferase	1.000000 4-Hydroxybenzoate[c0] + 1.000000 Solanesyl diphosphate[c0] <=> 1.000000 PPi[c0] + 1.000000 H+[c0] + 1.000000 Nonaprenyl-4-hydroxybenzoate[c0]	1.000000 M_cpd00136_c0 + 1.000000 M_cpd02172_c0 <=> 1.000000 M_cpd00012_c0 + 1.000000 M_cpd00067_c0 + 1.000000 M_cpd02419_c0		0	0	0	0	0	0	0	0	0	0	0	0
R_rxn05039_c0	R07280	1.0 5-Amino-6--5-phosphoribitylaminouracil[c0] + 1.0 H2O[c0] => 1.0 4--1-D-Ribitylamino-5-aminouracil[c0] + 1.0 Phosphate[c0]	1.0 M_cpd02720_c0 + 1.0 M_cpd00001_c0 => 1.0 M_cpd02882_c0 + 1.0 M_cpd00009_c0		6.13702e-05	6.13698e-05	6.13702e-05	6.13698e-05	6.13702e-05	6.13698e-05	6.13702e-05	6.13698e-05	6.13702e-05	6.13698e-05	8.1934e-06	8.1928e-06
R_rxn05040_c0	D-ribulose 5-phosphate formate-lyase (L-3,4-dihydroxybutan-2-one 4-phosphate-forming)	1.000000 D-Ribulose5-phosphate[c0] => 1.000000 H+[c0] + 1.000000 Formate[c0] + 1.000000 3-4-dihydroxy-2-butanone4-phosphate[c0]	1.000000 M_cpd00171_c0 => 1.000000 M_cpd00067_c0 + 1.000000 M_cpd00047_c0 + 1.000000 M_cpd11225_c0		0.00012274	0.00012274	0.00012274	0.00012274	0.00012274	0.00012274	0.00012274	0.00012274	0.00012274	0.00012274	1.63868e-05	1.63856e-05
R_rxn05054_c0	adenosylcobyric acid:(R)-1-aminopropan-2-ol ligase (ADP-forming)	1.000000 ATP[c0] + 1.000000 Adenosylcobyric acid[c0] + 1.000000 1-Aminopropan-2-ol[c0] <=> 1.000000 H+[c0] + 1.000000 ADP[c0] + 1.000000 Phosphate[c0] + 1.000000 Adenosyl cobinamide[c0]	1.000000 M_cpd00002_c0 + 1.000000 M_cpd03917_c0 + 1.000000 M_cpd02039_c0 <=> 1.000000 M_cpd00067_c0 + 1.000000 M_cpd00008_c0 + 1.000000 M_cpd00009_c0 + 1.000000 M_cpd03918_c0		0	0	0	0	0	0	0	0	0	0	0	0
R_rxn05072_c0	1D-myo-inositol-3-phosphate lyase (isomerizing)	1 D-glucose-6-phosphate[c0] <=> 1 Inositol 3-phosphate[c0]	1 M_cpd00079_c0 <=> 1 M_cpd02484_c0		0.000585649	0.000585649	0.000585649	0.000585649	0.000585649	0.000585649	0.000585649	0.000585649	0.000585649	0.000585649	7.81887e-05	7.81887e-05
R_rxn05092_c0	1,2-dihydroxy-5-(methylthio)pent-1-en-3-one:oxygen oxidoreductase (formate-forming)	1.000000 O2[c0] + 1.000000 1,2-dihydroxy-3-keto-5-methylthiopentene[c0] => 2.000000 H+[c0] + 1.000000 Formate[c0] + 1.000000 4-methylthio 2-oxobutyrate[c0]	1.000000 M_cpd00007_c0 + 1.000000 M_cpd11255_c0 => 2.000000 M_cpd00067_c0 + 1.000000 M_cpd00047_c0 + 1.000000 M_cpd00869_c0		0.0009	0.0009	0.0009	0.0009	0.0009	0.0009	0.0009	0.0009	0.0009	0.0009	0.000120157	0.000120157
R_rxn05104_c0	S-methyl-5-thio-D-ribulose-1-phosphate hydro-lyase	1.000000 methylthioribulose-1-phosphate[c0] => 1.000000 H2O[c0] + 1.000000 2,3-diketo5-methylthio-1-phosphopentane[c0]	1.000000 M_cpd02791_c0 => 1.000000 M_cpd00001_c0 + 1.000000 M_cpd11295_c0		0.0009	0.0009	0.0009	0.0009	0.0009	0.0009	0.0009	0.0009	0.0009	0.0009	0.000120157	0.000120157
R_rxn05105_c0	2,3-diketo-5-methylthiopentyl-1-phosphate keto---enol-isomerase	1.000000 2,3-diketo5-methylthio-1-phosphopentane[c0] <=> 1.000000 2-Hydroxy-3-keto-5-methylthiopentenyl-1-phosphate[c0]	1.000000 M_cpd11295_c0 <=> 1.000000 M_cpd11296_c0		0.0009	0.0009	0.0009	0.0009	0.0009	0.0009	0.0009	0.0009	0.0009	0.0009	0.000120157	0.000120157
R_rxn05106_c0	2-hydroxy-5-(methylthio)-3-oxopent-1-enyl phosphate phosphohydrolase	1.000000 H2O[c0] + 1.000000 2-Hydroxy-3-keto-5-methylthiopentenyl-1-phosphate[c0] => 1.000000 Phosphate[c0] + 1.000000 1,2-dihydroxy-3-keto-5-methylthiopentene[c0]	1.000000 M_cpd00001_c0 + 1.000000 M_cpd11296_c0 => 1.000000 M_cpd00009_c0 + 1.000000 M_cpd11255_c0		0.0009	0.0009	0.0009	0.0009	0.0009	0.0009	0.0009	0.0009	0.0009	0.0009	0.000120157	0.000120157
R_rxn05108_c0	R07396	1.000000 L-Glutamate[c0] + 1.000000 4-methylthio 2-oxobutyrate[c0] => 1.000000 L-Methionine[c0] + 1.000000 2-Oxoglutarate[c0]	1.000000 M_cpd00023_c0 + 1.000000 M_cpd00869_c0 => 1.000000 M_cpd00060_c0 + 1.000000 M_cpd00024_c0		0.0009	0.0009	0.0009	0.0009	0.0009	0.0009	0.0009	0.0009	0.0009	0.0009	0.000120157	0.000120157
R_rxn05109_c0	R07399	1.0 Acetyl-CoA[c0] + 1.0 Pyruvate[c0] + 1.0 H2O[c0] => 1.0 D-Citramalate[c0] + 1.0 CoA[c0] + 1.0 H+[c0]	1.0 M_cpd00022_c0 + 1.0 M_cpd00020_c0 + 1.0 M_cpd00001_c0 => 1.0 M_cpd01700_c0 + 1.0 M_cpd00010_c0 + 1.0 M_cpd00067_c0		0.0989454	0.0989454	0.0989454	0.0989454	0.0989454	0.0989454	0.0989454	0.0989454	0.0989454	0.0989454	0.01321	0.01321
R_rxn05123_c0	glutamate putrescine ligase	1 ATP[c0] + 1 L-Glutamate[c0] + 1 Putrescine[c0] => 1 ADP[c0] + 1 Phosphate[c0] + 1 H+[c0] + 1 gamma-L-Glutamylputrescine[c0]	1 M_cpd00002_c0 + 1 M_cpd00023_c0 + 1 M_cpd00118_c0 => 1 M_cpd00008_c0 + 1 M_cpd00009_c0 + 1 M_cpd00067_c0 + 1 M_cpd11340_c0		0	0	0	0	0	0	0	0	0	0	0	0
R_rxn05124_c0	R07415	1 H2O[c0] + 1 O2[c0] + 1 gamma-L-Glutamylputrescine[c0] => 1 NH3[c0] + 1 H2O2[c0] + 1 gamma-glutamyl-gamma-butyraldehyde[c0]	1 M_cpd00001_c0 + 1 M_cpd00007_c0 + 1 M_cpd11340_c0 => 1 M_cpd00013_c0 + 1 M_cpd00025_c0 + 1 M_cpd11341_c0		0	0	0	0	0	0	0	0	0	0	0	0
R_rxn05126_c0	R07417	1.000000 H2O[c0] + 1.000000 NAD[c0] + 1.000000 gamma-glutamyl-gamma-butyraldehyde[c0] => 2.000000 H+[c0] + 1.000000 NADH[c0] + 1.000000 gamma-Glutamyl-GABA[c0]	1.000000 M_cpd00001_c0 + 1.000000 M_cpd00003_c0 + 1.000000 M_cpd11341_c0 => 2.000000 M_cpd00067_c0 + 1.000000 M_cpd00004_c0 + 1.000000 M_cpd11408_c0		0	0	0	0	0	0	0	0	0	0	0	0
R_rxn05127_c0	R07418	1.000000 H2O[c0] + 1.000000 NADP[c0] + 1.000000 gamma-glutamyl-gamma-butyraldehyde[c0] => 2.000000 H+[c0] + 1.000000 NADPH[c0] + 1.000000 gamma-Glutamyl-GABA[c0]	1.000000 M_cpd00001_c0 + 1.000000 M_cpd00006_c0 + 1.000000 M_cpd11341_c0 => 2.000000 M_cpd00067_c0 + 1.000000 M_cpd00005_c0 + 1.000000 M_cpd11408_c0		0	0	0	0	0	0	0	0	0	0	0	0
R_rxn05142_c0	sinapoyl aldehyde:NAD oxidoreductase	1.000000 H2O[c0] + 1.000000 NAD[c0] + 1.000000 Sinapaldehyde[c0] <=> 2.000000 H+[c0] + 1.000000 NADH[c0] + 1.000000 Sinapate[c0]	1.000000 M_cpd00001_c0 + 1.000000 M_cpd00003_c0 + 1.000000 M_cpd03333_c0 <=> 2.000000 M_cpd00067_c0 + 1.000000 M_cpd00004_c0 + 1.000000 M_cpd00373_c0		0	0	0	0	0	0	0	0	0	0	0	0
R_rxn05145_c0	phosphate-transporting ATPase	1.000000 ATP[c0] + 1.000000 H2O[c0] + 1.000000 Phosphate[e0] <=> 1.000000 H+[c0] + 1.000000 ADP[c0] + 2.000000 Phosphate[c0]	1.000000 M_cpd00002_c0 + 1.000000 M_cpd00001_c0 + 1.000000 M_cpd00009_e0 <=> 1.000000 M_cpd00067_c0 + 1.000000 M_cpd00008_c0 + 2.000000 M_cpd00009_c0		0.20813	0.20813	0.20813	0.20813	0.20813	0.20813	0.20813	0.20813	0.20813	0.20813	0.027787	0.027787
R_rxn05146_c0	ATP phosphohydrolase (polar-amino-acid-importing)	1.0 ATP[c0] + 1.0 H2O[c0] + 1.0 L-Glutamate[e0] + 1.0 H+[c0] => 1.0 Phosphate[c0] + 1.0 L-Glutamate[c0] + 1.0 ADP[c0]	1.0 M_cpd00002_c0 + 1.0 M_cpd00001_c0 + 1.0 M_cpd00023_e0 + 1.0 M_cpd00067_c0 => 1.0 M_cpd00009_c0 + 1.0 M_cpd00023_c0 + 1.0 M_cpd00008_c0		0	0	0	0	0	0	0	0	0	0	0	0
R_rxn05153_c0	sulfate-transporting ATPase	1.000000 ATP[c0] + 1.000000 H2O[c0] + 1.000000 Sulfate[e0] => 1.000000 H+[c0] + 1.000000 ADP[c0] + 1.000000 Phosphate[c0] + 1.000000 Sulfate[c0]	1.000000 M_cpd00002_c0 + 1.000000 M_cpd00001_c0 + 1.000000 M_cpd00048_e0 => 1.000000 M_cpd00067_c0 + 1.000000 M_cpd00008_c0 + 1.000000 M_cpd00009_c0 + 1.000000 M_cpd00048_c0		0	37.327	0	22.2012	0	23.6946	0	351.483	0	320.411	0	27.919
R_rxn05172_c0	ATP phosphohydrolase (taurine-importing)	1 H2O[c0] + 1 ATP[c0] + 1 Taurine[e0] => 1 ADP[c0] + 1 Phosphate[c0] + 1 H+[c0] + 1 Taurine[c0]	1 M_cpd00001_c0 + 1 M_cpd00002_c0 + 1 M_cpd00210_e0 => 1 M_cpd00008_c0 + 1 M_cpd00009_c0 + 1 M_cpd00067_c0 + 1 M_cpd00210_c0		0	0	0	0	0	0	0	0	0	0	0	0
R_rxn05176_c0	thiosulfate transport via ABC system	1.000000 ATP[c0] + 1.000000 H2O[c0] + 1.000000 H2S2O3[e0] => 1.000000 H+[c0] + 1.000000 ADP[c0] + 1.000000 Phosphate[c0] + 1.000000 H2S2O3[c0]	1.000000 M_cpd00002_c0 + 1.000000 M_cpd00001_c0 + 1.000000 M_cpd00268_e0 => 1.000000 M_cpd00067_c0 + 1.000000 M_cpd00008_c0 + 1.000000 M_cpd00009_c0 + 1.000000 M_cpd00268_c0		0	0	0	0	0	0	0	0	0	0	0	0
R_rxn05195_c0	ATP phosphohydrolase (ferric-ion-transporting)	1.000000 ATP[c0] + 1.000000 H2O[c0] + 1.000000 Fe+3[e0] <=> 1.000000 H+[c0] + 1.000000 ADP[c0] + 1.000000 Phosphate[c0] + 1.000000 Fe+3[c0]	1.000000 M_cpd00002_c0 + 1.000000 M_cpd00001_c0 + 1.000000 M_cpd10516_e0 <=> 1.000000 M_cpd00067_c0 + 1.000000 M_cpd00008_c0 + 1.000000 M_cpd00009_c0 + 1.000000 M_cpd10516_c0		0.00434548	0.00434539	0.00434548	0.00434539	0.00434548	0.00434539	0.0009	0.00434539	0.0009	0.00434539	0.000580112	0.000580144
R_rxn05209_c0	TRANS-RXNBWI-115525.ce.maizeexp.NA+_NA+	1.000000 H+[c0] + 1.000000 Na+[e0] => 1.000000 H+[e0] + 1.000000 Na+[c0]	1.000000 M_cpd00067_c0 + 1.000000 M_cpd00971_e0 => 1.000000 M_cpd00067_e0 + 1.000000 M_cpd00971_c0		0	0	0	0	0	0	0	0	0	0	0	0
R_rxn05213_c0	citrate-Ca2+:H+ symporter	1.000000 H+[e0] + 1.000000 Citrate[e0] + 1.000000 Ca2+[e0] => 1.000000 H+[c0] + 1.000000 Citrate[c0] + 1.000000 Ca2+[c0]	1.000000 M_cpd00067_e0 + 1.000000 M_cpd00137_e0 + 1.000000 M_cpd00063_e0 => 1.000000 M_cpd00067_c0 + 1.000000 M_cpd00137_c0 + 1.000000 M_cpd00063_c0		0	0	0	0	0	0	0	0	0	0	0	0
R_rxn05217_c0	TRANS-RXNBWI-115637.ce.maizeexp.L-ASPARTATE_L-ASPARTATE	1.0 H+[e0] + 1.0 L-Aspartate[e0] => 1.0 H+[c0] + 1.0 L-Aspartate[c0]	1.0 M_cpd00067_e0 + 1.0 M_cpd00041_e0 => 1.0 M_cpd00067_c0 + 1.0 M_cpd00041_c0		0	0	0	0	0	0	0	0	0	0	0	0
R_rxn05219_c0	nonpolar-amino-acid-transporting ATPase	1.000000 ATP[c0] + 1.000000 H2O[c0] + 1.000000 L-Methionine[e0] => 1.000000 H+[c0] + 1.000000 ADP[c0] + 1.000000 Phosphate[c0] + 1.000000 L-Methionine[c0]	1.000000 M_cpd00002_c0 + 1.000000 M_cpd00001_c0 + 1.000000 M_cpd00060_e0 => 1.000000 M_cpd00067_c0 + 1.000000 M_cpd00008_c0 + 1.000000 M_cpd00009_c0 + 1.000000 M_cpd00060_c0		0	0	0	0	0	0	0	0	0	0	0	0
R_rxn05232_c0	2'-Deoxyadenosine 5'-triphosphate:oxydized-thioredoxin 2'-oxidoreductase	1.000000 ATP[c0] + 1.000000 trdrd[c0] => 1.000000 H2O[c0] + 1.000000 trdox[c0] + 1.000000 dATP[c0]	1.000000 M_cpd00002_c0 + 1.000000 M_cpd11421_c0 => 1.000000 M_cpd00001_c0 + 1.000000 M_cpd11420_c0 + 1.000000 M_cpd00115_c0		0.000585649	0.000585648	0.000585649	0.000585648	0.000585649	0.000585648	0.000585649	0.000585648	0.000585649	0.000585648	7.81887e-05	7.81871e-05
R_rxn05234_c0	2'-Deoxyguanosine 5'-triphosphate:oxydized-thioredoxin 2'-oxidoreductase	1.000000 GTP[c0] + 1.000000 trdrd[c0] => 1.000000 H2O[c0] + 1.000000 trdox[c0] + 1.000000 dGTP[c0]	1.000000 M_cpd00038_c0 + 1.000000 M_cpd11421_c0 => 1.000000 M_cpd00001_c0 + 1.000000 M_cpd11420_c0 + 1.000000 M_cpd00241_c0		0.000557761	0.00055776	0.000557761	0.00055776	0.000557761	0.00055776	0.000557761	0.00055776	0.000557761	0.00055776	7.44654e-05	7.44639e-05
R_rxn05235_c0	2'-Deoxyuridine 5'-triphosphate:oxydized-thioredoxin 2'-oxidoreductase	1.000000 CTP[c0] + 1.000000 trdrd[c0] => 1.000000 H2O[c0] + 1.000000 dCTP[c0] + 1.000000 trdox[c0]	1.000000 M_cpd00052_c0 + 1.000000 M_cpd11421_c0 => 1.000000 M_cpd00001_c0 + 1.000000 M_cpd00356_c0 + 1.000000 M_cpd11420_c0		0.000557761	0.00584647	0.000557761	0.00584647	0.000557761	0.00584647	0.000557761	0.00584647	0.000557761	0.00584647	7.44654e-05	0.000780546
R_rxn05237_c0	ATP phosphohydrolase (polar-amino-acid-importing)	1.000000 ATP[c0] + 1.000000 H2O[c0] + 1.000000 L-Cysteine[e0] => 1.000000 H+[c0] + 1.000000 ADP[c0] + 1.000000 Phosphate[c0] + 1.000000 L-Cysteine[c0]	1.000000 M_cpd00002_c0 + 1.000000 M_cpd00001_c0 + 1.000000 M_cpd00084_e0 => 1.000000 M_cpd00067_c0 + 1.000000 M_cpd00008_c0 + 1.000000 M_cpd00009_c0 + 1.000000 M_cpd00084_c0		0	0	0	0	0	0	0	0	0	0	0	0
R_rxn05239_c0	adenosine 3',5'-bisphosphate,sulfite:oxidized-thioredoxin oxidoreductase (3'-phosphoadenosine-5'-phosphosulfate -forming)	1.000000 trdrd[c0] + 1.000000 3-phosphoadenylylsulfate[c0] <=> 1.000000 H+[c0] + 1.000000 Sulfite[c0] + 1.000000 trdox[c0] + 1.000000 Adenosine 3-5-bisphosphate[c0]	1.000000 M_cpd11421_c0 + 1.000000 M_cpd00044_c0 <=> 1.000000 M_cpd00067_c0 + 1.000000 M_cpd00081_c0 + 1.000000 M_cpd11420_c0 + 1.000000 M_cpd00045_c0		-0.0009	-0.0009	-0.0009	-0.0009	-0.0009	-0.0009	-0.0009	-0.0009	-0.0009	-0.0009	-0.000120157	-0.000120157
R_rxn05244_c0	TRANS-RXNBWI-115637.ce.maizeexp.ILE_ILE	1.000000 H+[e0] + 1.000000 L-Isoleucine[e0] => 1.000000 H+[c0] + 1.000000 L-Isoleucine[c0]	1.000000 M_cpd00067_e0 + 1.000000 M_cpd00322_e0 => 1.000000 M_cpd00067_c0 + 1.000000 M_cpd00322_c0		0	0	0	0	0	0	0	0	0	0	0	0
R_rxn05247_c0	FACOAL140(ISO)	1.000000 ATP[c0] + 1.000000 CoA[c0] + 1.000000 fa1[c0] => 1.000000 PPi[c0] + 1.000000 AMP[c0] + 1.000000 fa1coa[c0]	1.000000 M_cpd00002_c0 + 1.000000 M_cpd00010_c0 + 1.000000 M_cpd11430_c0 => 1.000000 M_cpd00012_c0 + 1.000000 M_cpd00018_c0 + 1.000000 M_cpd11435_c0		0	0	0	0	0	0	0	0	0	0	0	0
R_rxn05248_c0	FACOAL150(anteiso)	1.000000 ATP[c0] + 1.000000 CoA[c0] + 1.000000 fa4[c0] => 1.000000 PPi[c0] + 1.000000 AMP[c0] + 1.000000 fa4coa[c0]	1.000000 M_cpd00002_c0 + 1.000000 M_cpd00010_c0 + 1.000000 M_cpd11438_c0 => 1.000000 M_cpd00012_c0 + 1.000000 M_cpd00018_c0 + 1.000000 M_cpd11439_c0		0	0	0	0	0	0	0	0	0	0	0	0
R_rxn05249_c0	FACOAL150(ISO)	1.000000 ATP[c0] + 1.000000 CoA[c0] + 1.000000 fa3[c0] => 1.000000 PPi[c0] + 1.000000 AMP[c0] + 1.000000 fa3coa[c0]	1.000000 M_cpd00002_c0 + 1.000000 M_cpd00010_c0 + 1.000000 M_cpd11436_c0 => 1.000000 M_cpd00012_c0 + 1.000000 M_cpd00018_c0 + 1.000000 M_cpd11437_c0		0	0	0	0	0	0	0	0	0	0	0	0
R_rxn05250_c0	FACOAL160(ISO)	1.000000 ATP[c0] + 1.000000 CoA[c0] + 1.000000 fa6[c0] => 1.000000 PPi[c0] + 1.000000 AMP[c0] + 1.000000 fa6coa[c0]	1.000000 M_cpd00002_c0 + 1.000000 M_cpd00010_c0 + 1.000000 M_cpd11440_c0 => 1.000000 M_cpd00012_c0 + 1.000000 M_cpd00018_c0 + 1.000000 M_cpd11441_c0		0	0	0	0	0	0	0	0	0	0	0	0
R_rxn05251_c0	FACOAL170(anteiso)	1.000000 ATP[c0] + 1.000000 CoA[c0] + 1.000000 fa12[c0] => 1.000000 PPi[c0] + 1.000000 AMP[c0] + 1.000000 fa12coa[c0]	1.000000 M_cpd00002_c0 + 1.000000 M_cpd00010_c0 + 1.000000 M_cpd11433_c0 => 1.000000 M_cpd00012_c0 + 1.000000 M_cpd00018_c0 + 1.000000 M_cpd11434_c0		0	0	0	0	0	0	0	0	0	0	0	0
R_rxn05252_c0	FACOAL170(ISO)	1.000000 ATP[c0] + 1.000000 CoA[c0] + 1.000000 fa11[c0] => 1.000000 PPi[c0] + 1.000000 AMP[c0] + 1.000000 fa11coa[c0]	1.000000 M_cpd00002_c0 + 1.000000 M_cpd00010_c0 + 1.000000 M_cpd11431_c0 => 1.000000 M_cpd00012_c0 + 1.000000 M_cpd00018_c0 + 1.000000 M_cpd11432_c0		0	0	0	0	0	0	0	0	0	0	0	0
R_rxn05256_c0	AMP,sulfite:thioredoxin-disulfide oxidoreductase(adenosine-5'-phosphosulfate-forming)	1.000000 APS[c0] + 1.000000 trdrd[c0] => 1.000000 H+[c0] + 1.000000 AMP[c0] + 1.000000 Sulfite[c0] + 1.000000 trdox[c0]	1.000000 M_cpd00193_c0 + 1.000000 M_cpd11421_c0 => 1.000000 M_cpd00067_c0 + 1.000000 M_cpd00018_c0 + 1.000000 M_cpd00081_c0 + 1.000000 M_cpd11420_c0		0	0.051532	0	0.051532	0	0.051532	0	0.051532	0	0.051532	0	0.00687992
R_rxn05274_c0	b-ketoacyl synthetase (Iso-C14:0)	10 NADPH[c0] + 14 H+[c0] + 5 Malonyl-CoA[c0] + 1 Isobutyryl-CoA[c0] => 4 H2O[c0] + 10 NADP[c0] + 6 CoA[c0] + 5 CO2[c0] + 1 fa1[c0]	10 M_cpd00005_c0 + 14 M_cpd00067_c0 + 5 M_cpd00070_c0 + 1 M_cpd00481_c0 => 4 M_cpd00001_c0 + 10 M_cpd00006_c0 + 6 M_cpd00010_c0 + 5 M_cpd00011_c0 + 1 M_cpd11430_c0		0	0	0	0	0	0	0	0	0	0	0	0
R_rxn05280_c0	b-ketoacyl synthetase (Iso-C16:0)	12 NADPH[c0] + 17 H+[c0] + 6 Malonyl-CoA[c0] + 1 Isobutyryl-CoA[c0] => 5 H2O[c0] + 12 NADP[c0] + 7 CoA[c0] + 6 CO2[c0] + 1 fa6[c0]	12 M_cpd00005_c0 + 17 M_cpd00067_c0 + 6 M_cpd00070_c0 + 1 M_cpd00481_c0 => 5 M_cpd00001_c0 + 12 M_cpd00006_c0 + 7 M_cpd00010_c0 + 6 M_cpd00011_c0 + 1 M_cpd11440_c0		0	0	0	0	0	0	0	0	0	0	0	0
R_rxn05287_c0	geranylgeranyl-diphosphate:isopentenyl-diphosphate transtransferase	1.000000 Isopentenyldiphosphate[c0] + 1.000000 Geranylgeranyl diphosphate[c0] => 1.000000 PPi[c0] + 1.000000 H+[c0] + 1.000000 pendp[c0]	1.000000 M_cpd00113_c0 + 1.000000 M_cpd00289_c0 => 1.000000 M_cpd00012_c0 + 1.000000 M_cpd00067_c0 + 1.000000 M_cpd02591_c0		0.0018	0.0018	0.0018	0.0018	0.0018	0.0018	0.0018	0.0018	0.0018	0.114748	0.000240314	0.000240314
R_rxn05289_c0	NADPH:oxidized-thioredoxin oxidoreductase	1.000000 H+[c0] + 1.000000 NADPH[c0] + 1.000000 trdox[c0] => 1.000000 NADP[c0] + 1.000000 trdrd[c0]	1.000000 M_cpd00067_c0 + 1.000000 M_cpd00005_c0 + 1.000000 M_cpd11420_c0 => 1.000000 M_cpd00006_c0 + 1.000000 M_cpd11421_c0		0.00608988	21.5029	0.00608988	14.9188	0.00608988	15.4788	0.00608988	138.4	0.00608988	126.835	0.000813046	11.3499
R_rxn05291_c0	b-ketoacyl synthetase (palmitate, n-C16:0)	14 NADPH[c0] + 1 Acetyl-CoA[c0] + 20 H+[c0] + 7 Malonyl-CoA[c0] => 6 H2O[c0] + 14 NADP[c0] + 8 CoA[c0] + 7 CO2[c0] + 1 Palmitate[c0]	14 M_cpd00005_c0 + 1 M_cpd00022_c0 + 20 M_cpd00067_c0 + 7 M_cpd00070_c0 => 6 M_cpd00001_c0 + 14 M_cpd00006_c0 + 8 M_cpd00010_c0 + 7 M_cpd00011_c0 + 1 M_cpd00214_c0		0	0.106083	0	-2.2e-09	0	-2.2e-09	0	-2.2e-09	0	0.106083	0	7e-10
R_rxn05293_c0	2C-methyl-D-erythritol 2,4 cyclodiphosphate dehydratase	1.000000 H+[c0] + 1.000000 NADH[c0] + 1.000000 2-C-methyl-D-erythritol2-4-cyclodiphosphate[c0] => 1.000000 H2O[c0] + 1.000000 NAD[c0] + 1.000000 1-Hydroxy-2-methyl-2-butenyl 4-diphosphate[c0]	1.000000 M_cpd00067_c0 + 1.000000 M_cpd00004_c0 + 1.000000 M_cpd08301_c0 => 1.000000 M_cpd00001_c0 + 1.000000 M_cpd00003_c0 + 1.000000 M_cpd08615_c0		0.0943637	0.0943637	0.0943637	0.0943637	0.0943637	0.0943637	0.0943637	0.0943637	0.0943637	0.997947	0.0125983	0.0125983
R_rxn05299_c0	TRANS-RXNBWI-115637.ce.maizeexp.HIS_HIS	1.000000 H+[e0] + 1.000000 L-Histidine[e0] => 1.000000 H+[c0] + 1.000000 L-Histidine[c0]	1.000000 M_cpd00067_e0 + 1.000000 M_cpd00119_e0 => 1.000000 M_cpd00067_c0 + 1.000000 M_cpd00119_c0		0	0	0	0	0	0	0	0	0	0	0	0
R_rxn05301_c0	TRANS-RXNBWI-115637.ce.maizeexp.TYR_TYR	1.000000 H+[e0] + 1.000000 L-Tyrosine[e0] => 1.000000 H+[c0] + 1.000000 L-Tyrosine[c0]	1.000000 M_cpd00067_e0 + 1.000000 M_cpd00069_e0 => 1.000000 M_cpd00067_c0 + 1.000000 M_cpd00069_c0		0	0	0	0	0	0	0	0	0	0	0	0
R_rxn05303_c0	TRANS-RXNBWI-115637.ce.maizeexp.ARG_ARG	1.000000 H+[e0] + 1.000000 L-Arginine[e0] => 1.000000 H+[c0] + 1.000000 L-Arginine[c0]	1.000000 M_cpd00067_e0 + 1.000000 M_cpd00051_e0 => 1.000000 M_cpd00067_c0 + 1.000000 M_cpd00051_c0		0	0	0	0	0	0	0	0	0	0	0	0
R_rxn05306_c0	TRANS-RXNBWI-115637.ce.maizeexp.PHE_PHE	1.000000 H+[e0] + 1.000000 L-Phenylalanine[e0] => 1.000000 H+[c0] + 1.000000 L-Phenylalanine[c0]	1.000000 M_cpd00067_e0 + 1.000000 M_cpd00066_e0 => 1.000000 M_cpd00067_c0 + 1.000000 M_cpd00066_c0		0	0	0	0	0	0	0	0	0	0	0	0
R_rxn05313_c0	phosphate transport in/out via three Na+ symporter	1.000000 Phosphate[e0] + 3.000000 Na+[e0] => 1.000000 Phosphate[c0] + 3.000000 Na+[c0]	1.000000 M_cpd00009_e0 + 3.000000 M_cpd00971_e0 => 1.000000 M_cpd00009_c0 + 3.000000 M_cpd00971_c0		0	0	0	0	0	0	0	0	0	0	0	0
R_rxn05315_c0	ZN2t4	1.000000 H+[e0] + 1.000000 K+[e0] + 1.000000 Zn2+[c0] <=> 1.000000 H+[c0] + 1.000000 K+[c0] + 1.000000 Zn2+[e0]	1.000000 M_cpd00067_e0 + 1.000000 M_cpd00205_e0 + 1.000000 M_cpd00034_c0 <=> 1.000000 M_cpd00067_c0 + 1.000000 M_cpd00205_c0 + 1.000000 M_cpd00034_e0		-0.0009	-0.0009	-0.0009	-0.0009	-0.0009	-0.0009	-0.0009	-0.0009	-0.0009	-0.0009	-0.000120157	-0.000120157
R_rxn05319_c0	TRANS-RXNBWI-115401.ce.maizeexp.OH_OH	1.000000 H2O[c0] <=> 1.000000 H2O[e0]	1.000000 M_cpd00001_c0 <=> 1.000000 M_cpd00001_e0		19.8429	21.4341	19.8429	19.8429	19.8429	19.8429	19.8429	50.8327	15.3626	49.2062	2.64918	2.64918
R_rxn05322_c0	Butyryl-[acyl-carrier protein]:malonyl-CoA C-acyltransferase(decarboxylating, oxoacyl- and enoyl-reducing)	2.000000 H+[c0] + 1.000000 NADH[c0] + 1.000000 But-2-enoyl-[acyl-carrier protein][c0] => 1.000000 NAD[c0] + 1.000000 Butyryl-ACP[c0]	2.000000 M_cpd00067_c0 + 1.000000 M_cpd00004_c0 + 1.000000 M_cpd11465_c0 => 1.000000 M_cpd00003_c0 + 1.000000 M_cpd11464_c0		0	0	0	0	0	0	0	0	0	0	0	0
R_rxn05323_c0	Tetradecanoyl-[acyl-carrier protein]:malonyl-CoA C-acyltransferase(decarboxylating, oxoacyl- and enoyl-reducing)	2.000000 H+[c0] + 1.000000 NADH[c0] + 1.000000 (2E)-Tetradecenoyl-[acp][c0] => 1.000000 NAD[c0] + 1.000000 Myristoyl-ACP[c0]	2.000000 M_cpd00067_c0 + 1.000000 M_cpd00004_c0 + 1.000000 M_cpd11467_c0 => 1.000000 M_cpd00003_c0 + 1.000000 M_cpd11466_c0		133.013	253.006	151.608	218.254	151.608	222.734	-0.00223104	1034.11	53.0004	1045.63	20.2409	104.004
R_rxn05324_c0	Dodecanoyl-[acyl-carrier protein]:malonyl-CoA C-acyltransferase(decarboxylating, oxoacyl- and enoyl-reducing)	2.000000 H+[c0] + 1.000000 NADH[c0] + 1.000000 (2E)-Dodecenoyl-[acp][c0] => 1.000000 NAD[c0] + 1.000000 Dodecanoyl-ACP[c0]	2.000000 M_cpd00067_c0 + 1.000000 M_cpd00004_c0 + 1.000000 M_cpd11469_c0 => 1.000000 M_cpd00003_c0 + 1.000000 M_cpd11468_c0		0	0.11445	0	0.0083664	0	0.0083664	0	3.8821	0	3.41812	0	0.00111698
R_rxn05325_c0	Octanoyl-[acyl-carrier protein]:malonyl-CoA C-acyltransferase(decarboxylating, oxoacyl- and enoyl-reducing)	1.000000 H+[c0] + 1.000000 NADH[c0] + 1.000000 (2E)-Octenoyl-[acp][c0] => 1.000000 NAD[c0] + 1.000000 Octanoyl-ACP[c0]	1.000000 M_cpd00067_c0 + 1.000000 M_cpd00004_c0 + 1.000000 M_cpd11471_c0 => 1.000000 M_cpd00003_c0 + 1.000000 M_cpd11470_c0		0	0	0	0	0	0	0	0	0	0	0	0
R_rxn05326_c0	Hexanoyl-[acyl-carrier protein]:malonyl-CoA C-acyltransferase(decarboxylating, oxoacyl- and enoyl-reducing)	1.000000 H+[c0] + 1.000000 NADH[c0] + 1.000000 (2E)-Hexenoyl-[acp][c0] => 1.000000 NAD[c0] + 1.000000 Hexanoyl-ACP[c0]	1.000000 M_cpd00067_c0 + 1.000000 M_cpd00004_c0 + 1.000000 M_cpd11473_c0 => 1.000000 M_cpd00003_c0 + 1.000000 M_cpd11472_c0		0	0	0	0	0	0	0	0	0	0	0	0
R_rxn05327_c0	Decanoyl-[acyl-carrier protein]:malonyl-CoA C-acyltransferase(decarboxylating, oxoacyl- and enoyl-reducing)	2.000000 H+[c0] + 1.000000 NADH[c0] + 1.000000 (2E)-Decenoyl-[acp][c0] => 1.000000 NAD[c0] + 1.000000 Decanoyl-ACP[c0]	2.000000 M_cpd00067_c0 + 1.000000 M_cpd00004_c0 + 1.000000 M_cpd11475_c0 => 1.000000 M_cpd00003_c0 + 1.000000 M_cpd11474_c0		0	0.11445	0	0.0083664	0	0.0083664	0	3.8821	0	3.41812	0	0.00111698
R_rxn05328_c0	Hexadecanoyl-[acyl-carrier protein]:malonyl-CoA C-acyltransferase(decarboxylating, oxoacyl- and enoyl-reducing)	1.000000 H+[c0] + 1.000000 NADH[c0] + 1.000000 (2E)-Hexadecenoyl-[acp][c0] => 1.000000 NAD[c0] + 1.000000 hexadecanoyl-acp[c0]	1.000000 M_cpd00067_c0 + 1.000000 M_cpd00004_c0 + 1.000000 M_cpd11477_c0 => 1.000000 M_cpd00003_c0 + 1.000000 M_cpd11476_c0		0	0.106083	0	-2.2e-09	0	-2.2e-09	0	-2.2e-09	0	0.106083	0	7e-10
R_rxn05329_c0	(3R)-3-Hydroxybutanoyl-[acyl-carrier-protein] hydro-lyase	1 (R)-3-Hydroxybutanoyl-[acyl-carrier protein][c0] <=> 1 H2O[c0] + 1 But-2-enoyl-[acyl-carrier protein][c0]	1 M_cpd11478_c0 <=> 1 M_cpd00001_c0 + 1 M_cpd11465_c0		0	0	0	0	0	0	0	0	0	0	0	0
R_rxn05330_c0	(3R)-3-Hydroxybutanoyl-[acyl-carrier-protein] hydro-lyase	1 D-3-Hydroxyhexanoyl-[acp][c0] <=> 1 H2O[c0] + 1 (2E)-Hexenoyl-[acp][c0]	1 M_cpd11479_c0 <=> 1 M_cpd00001_c0 + 1 M_cpd11473_c0		0	0	0	0	0	0	0	0	0	0	0	0
R_rxn05331_c0	(3R)-3-Hydroxybutanoyl-[acyl-carrier-protein] hydro-lyase	1 D-3-Hydroxydodecanoyl-[acp][c0] <=> 1 H2O[c0] + 1 (2E)-Dodecenoyl-[acp][c0]	1 M_cpd11480_c0 <=> 1 M_cpd00001_c0 + 1 M_cpd11469_c0		0	0.11445	0	0.0083664	0	0.0083664	0	3.8821	0	3.41812	0	0.00111698
R_rxn05333_c0	(3R)-3-Hydroxybutanoyl-[acyl-carrier-protein] hydro-lyase	1 (R)-3-Hydroxydecanoyl-[acyl-carrier protein][c0] <=> 1 H2O[c0] + 1 (2E)-Decenoyl-[acp][c0]	1 M_cpd11482_c0 <=> 1 M_cpd00001_c0 + 1 M_cpd11475_c0		0	0.11445	0	0.0083664	0	0.0083664	0	3.8821	0	3.41812	0	0.00111698
R_rxn05336_c0	(3R)-3-Hydroxypalmitoyl-[acyl-carrier-protein]:NADP+ oxidoreductase	1.000000 NADP[c0] + 1.000000 R-3-hydroxypalmitoyl-acyl-carrierprotein-[c0] <=> 1.000000 NADPH[c0] + 1.000000 3-oxohexadecanoyl-acp[c0]	1.000000 M_cpd00006_c0 + 1.000000 M_cpd11481_c0 <=> 1.000000 M_cpd00005_c0 + 1.000000 M_cpd11485_c0		-0.106083	0	2.2e-09	0	2.2e-09	0	2.2e-09	0	-0.106083	0	-7e-10	0
R_rxn05337_c0	(3R)-3-Hydroxyhexanoyl-[acyl-carrier-protein]:NADP+ oxidoreductase	1.000000 NADP[c0] + 1.000000 D-3-Hydroxyhexanoyl-[acp][c0] <=> 1.000000 NADPH[c0] + 1.000000 3-Oxohexanoyl-[acp][c0]	1.000000 M_cpd00006_c0 + 1.000000 M_cpd11479_c0 <=> 1.000000 M_cpd00005_c0 + 1.000000 M_cpd11486_c0		0	0	0	0	0	0	0	0	0	0	0	0
R_rxn05338_c0	(3R)-3-Hydroxydecanoyl-[acyl-carrier-protein]:NADP+ oxidoreductase	1.000000 NADP[c0] + 1.000000 (R)-3-Hydroxydecanoyl-[acyl-carrier protein][c0] <=> 1.000000 H+[c0] + 1.000000 NADPH[c0] + 1.000000 3-oxodecanoyl-acp[c0]	1.000000 M_cpd00006_c0 + 1.000000 M_cpd11482_c0 <=> 1.000000 M_cpd00067_c0 + 1.000000 M_cpd00005_c0 + 1.000000 M_cpd11487_c0		-0.11445	0	-0.0083664	0	-0.0083664	0	-3.8821	0	-3.41812	0	-0.00111698	0
R_rxn05339_c0	(3R)-3-Hydroxybutanoyl-[acyl-carrier protein]:NADP+ oxidoreductase	1.000000 NADP[c0] + 1.000000 (R)-3-Hydroxybutanoyl-[acyl-carrier protein][c0] <=> 1.000000 NADPH[c0] + 1.000000 Acetoacetyl-ACP[c0]	1.000000 M_cpd00006_c0 + 1.000000 M_cpd11478_c0 <=> 1.000000 M_cpd00005_c0 + 1.000000 M_cpd11488_c0		0	0	0	0	0	0	0	0	0	0	0	0
R_rxn05340_c0	(3R)-3-Hydroxydodecanoyl-[acyl-carrier-protein]:NADP+ oxidoreductase	1.000000 NADP[c0] + 1.000000 D-3-Hydroxydodecanoyl-[acp][c0] <=> 1.000000 NADPH[c0] + 1.000000 3-oxododecanoyl-acp[c0]	1.000000 M_cpd00006_c0 + 1.000000 M_cpd11480_c0 <=> 1.000000 M_cpd00005_c0 + 1.000000 M_cpd11489_c0		-0.11445	0	-0.0083664	0	-0.0083664	0	-3.8821	0	-3.41812	0	-0.00111698	0
R_rxn05341_c0	(3R)-3-Hydroxyoctanoyl-[acyl-carrier-protein]:NADP+ oxidoreductase	1.000000 NADP[c0] + 1.000000 (R)-3-Hydroxyoctanoyl-[acyl-carrier protein][c0] <=> 1.000000 H+[c0] + 1.000000 NADPH[c0] + 1.000000 3-oxooctanoyl-acp[c0]	1.000000 M_cpd00006_c0 + 1.000000 M_cpd11483_c0 <=> 1.000000 M_cpd00067_c0 + 1.000000 M_cpd00005_c0 + 1.000000 M_cpd11490_c0		0	0	0	0	0	0	0	0	0	0	0	0
R_rxn05342_c0	(3R)-3-Hydroxytetradecanoyl-[acyl-carrier-protein]:NADP+ oxidoreductase	1.000000 NADP[c0] + 1.000000 HMA[c0] <=> 1.000000 NADPH[c0] + 1.000000 3-oxotetradecanoyl-acp[c0]	1.000000 M_cpd00006_c0 + 1.000000 M_cpd11484_c0 <=> 1.000000 M_cpd00005_c0 + 1.000000 M_cpd11491_c0		-0.00223104	-0.00223104	-0.00223104	-0.00223104	-0.00223104	-0.00223104	-0.00223104	-0.00223104	-0.00223104	-0.00223104	-0.000297852	-0.000297862
R_rxn05343_c0	Octanoyl-[acyl-carrier protein]:malonyl-[acyl-carrier-protein] C-acyltransferase (decarboxylating)	1.000000 Malonyl-acyl-carrierprotein-[c0] + 1.000000 Octanoyl-ACP[c0] => 1.000000 ACP[c0] + 1.000000 CO2[c0] + 1.000000 3-oxodecanoyl-acp[c0]	1.000000 M_cpd11492_c0 + 1.000000 M_cpd11470_c0 => 1.000000 M_cpd11493_c0 + 1.000000 M_cpd00011_c0 + 1.000000 M_cpd11487_c0		0	0.11445	0	0.0083664	0	0.0083664	0	3.8821	0	3.41812	0	0.00111698
R_rxn05344_c0	Tetradecanoyl-[acyl-carrier protein]:malonyl-[acyl-carrier-protein] C-acyltransferase (decarboxylating)	1.000000 Myristoyl-ACP[c0] + 1.000000 Malonyl-acyl-carrierprotein-[c0] => 1.000000 ACP[c0] + 1.000000 CO2[c0] + 1.000000 3-oxohexadecanoyl-acp[c0]	1.000000 M_cpd11466_c0 + 1.000000 M_cpd11492_c0 => 1.000000 M_cpd11493_c0 + 1.000000 M_cpd00011_c0 + 1.000000 M_cpd11485_c0		0	0.106083	0	-2.2e-09	0	-2.2e-09	0	-2.2e-09	0	0.106083	0	7e-10
R_rxn05345_c0	dodecanoyl-[acyl-carrier-protein]:malonyl-[acyl-carrier-protein] C-acyltransferase (decarboxylating)	1.000000 Malonyl-acyl-carrierprotein-[c0] + 1.000000 Dodecanoyl-ACP[c0] => 1.000000 ACP[c0] + 1.000000 CO2[c0] + 1.000000 3-oxotetradecanoyl-acp[c0]	1.000000 M_cpd11492_c0 + 1.000000 M_cpd11468_c0 => 1.000000 M_cpd11493_c0 + 1.000000 M_cpd00011_c0 + 1.000000 M_cpd11491_c0		133.015	253.008	151.61	218.256	151.61	222.737	0	1034.11	53.0026	1045.64	20.2412	104.004
R_rxn05346_c0	butyryl-[acyl-carrier protein]:malonyl-[acyl-carrier-protein] C-acyltransferase (decarboxylating)	1.000000 Malonyl-acyl-carrierprotein-[c0] + 1.000000 Butyryl-ACP[c0] => 1.000000 ACP[c0] + 1.000000 CO2[c0] + 1.000000 3-Oxohexanoyl-[acp][c0]	1.000000 M_cpd11492_c0 + 1.000000 M_cpd11464_c0 => 1.000000 M_cpd11493_c0 + 1.000000 M_cpd00011_c0 + 1.000000 M_cpd11486_c0		0	0	0	0	0	0	0	0	0	0	0	0
R_rxn05347_c0	Acyl-[acyl-carrier-protein]:malonyl-[acyl-carrier-protein] C-acyltransferase (decarboxylating)	1.000000 Malonyl-acyl-carrierprotein-[c0] + 1.000000 Acetyl-ACP[c0] => 1.000000 ACP[c0] + 1.000000 CO2[c0] + 1.000000 Acetoacetyl-ACP[c0]	1.000000 M_cpd11492_c0 + 1.000000 M_cpd11494_c0 => 1.000000 M_cpd11493_c0 + 1.000000 M_cpd00011_c0 + 1.000000 M_cpd11488_c0		0	0	0	0	0	0	0	0	0	0	0	0
R_rxn05348_c0	Decanoyl-[acyl-carrier protein]:malonyl-[acyl-carrier-protein] C-acyltransferase (decarboxylating)	1.000000 Malonyl-acyl-carrierprotein-[c0] + 1.000000 Decanoyl-ACP[c0] => 1.000000 ACP[c0] + 1.000000 CO2[c0] + 1.000000 3-oxododecanoyl-acp[c0]	1.000000 M_cpd11492_c0 + 1.000000 M_cpd11474_c0 => 1.000000 M_cpd11493_c0 + 1.000000 M_cpd00011_c0 + 1.000000 M_cpd11489_c0		0	0.11445	0	0.0083664	0	0.0083664	0	3.8821	0	3.41812	0	0.00111698
R_rxn05349_c0	acetyl-CoA:[acyl-carrier-protein] S-acetyltransferase	1.000000 Acetyl-CoA[c0] + 1.000000 ACP[c0] <=> 1.000000 CoA[c0] + 1.000000 Acetyl-ACP[c0]	1.000000 M_cpd00022_c0 + 1.000000 M_cpd11493_c0 <=> 1.000000 M_cpd00010_c0 + 1.000000 M_cpd11494_c0		0	0.11445	0	0.0083664	0	0.0083664	0	3.8821	0	3.41812	0	0.00111698
R_rxn05350_c0	hexanoyl-[acyl-carrier protein]:malonyl-[acyl-carrier-protein] C-acyltransferase (decarboxylating)	1.000000 H+[c0] + 1.000000 Malonyl-acyl-carrierprotein-[c0] + 1.000000 Hexanoyl-ACP[c0] => 1.000000 ACP[c0] + 1.000000 CO2[c0] + 1.000000 3-oxooctanoyl-acp[c0]	1.000000 M_cpd00067_c0 + 1.000000 M_cpd11492_c0 + 1.000000 M_cpd11472_c0 => 1.000000 M_cpd11493_c0 + 1.000000 M_cpd00011_c0 + 1.000000 M_cpd11490_c0		0	0	0	0	0	0	0	0	0	0	0	0
R_rxn05358_c0	2-methylbutanoyl-CoA:[acyl-carrier-protein] transferase	1.000000 ACP[c0] + 1.000000 2-Methylbutyryl-CoA[c0] <=> 1.000000 H+[c0] + 1.000000 CoA[c0] + 1.000000 2-methylbutyryl-ACP[c0]	1.000000 M_cpd11493_c0 + 1.000000 M_cpd00760_c0 <=> 1.000000 M_cpd00067_c0 + 1.000000 M_cpd00010_c0 + 1.000000 M_cpd11495_c0		0.0234804	0.0234804	0.0234804	0.0234804	0.0234804	0.0234804	0.0234804	0.0234804	0.0234804	0.0234804	0.00313481	0.00313481
R_rxn05359_c0	4-methyl-3-oxo-hexanoyl-ACP:malonyl-[acyl-carrier-protein] C-acyltransferase (decarboxylating)	1.000000 Malonyl-acyl-carrierprotein-[c0] + 1.000000 2-methylbutyryl-ACP[c0] => 1.000000 ACP[c0] + 1.000000 CO2[c0] + 1.000000 4-methyl-3-oxo-hexanoyl-ACP[c0]	1.000000 M_cpd11492_c0 + 1.000000 M_cpd11495_c0 => 1.000000 M_cpd11493_c0 + 1.000000 M_cpd00011_c0 + 1.000000 M_cpd11496_c0		0.0234804	0.0234804	0.0234804	0.0234804	0.0234804	0.0234804	0.0234804	0.0234804	0.0234804	0.0234804	0.00313481	0.00313481
R_rxn05360_c0	4-methyl-3-oxo-hexanoyl-ACP:NADP+ oxidoreductase	1.000000 H+[c0] + 1.000000 NADPH[c0] + 1.000000 4-methyl-3-oxo-hexanoyl-ACP[c0] <=> 1.000000 NADP[c0] + 1.000000 4-methyl-3-hydroxy-hexanoyl-ACP[c0]	1.000000 M_cpd00067_c0 + 1.000000 M_cpd00005_c0 + 1.000000 M_cpd11496_c0 <=> 1.000000 M_cpd00006_c0 + 1.000000 M_cpd11497_c0		0.0234804	0.0234804	0.0234804	0.0234804	0.0234804	0.0234804	0.0234804	0.0234804	0.0234804	0.0234804	0.00313481	0.00313481
R_rxn05361_c0	4-methyl-3-hydroxy-hexanoyl-ACP hydro-lyase	1.000000 4-methyl-3-hydroxy-hexanoyl-ACP[c0] => 1.000000 H2O[c0] + 1.000000 4-methyl-trans-hex-2-enoyl-ACP[c0]	1.000000 M_cpd11497_c0 => 1.000000 M_cpd00001_c0 + 1.000000 M_cpd11498_c0		0.0234804	0.0234804	0.0234804	0.0234804	0.0234804	0.0234804	0.0234804	0.0234804	0.0234804	0.0234804	0.00313481	0.00313481
R_rxn05363_c0	4-methyl-hexanoyl-ACP:malonyl-[acyl-carrier-protein] C-acyltransferase (decarboxylating)	1.000000 Malonyl-acyl-carrierprotein-[c0] + 1.000000 4-methyl-hexanoyl-ACP[c0] => 1.000000 ACP[c0] + 1.000000 CO2[c0] + 1.000000 6-methyl-3-oxo-octanoyl-ACP[c0]	1.000000 M_cpd11492_c0 + 1.000000 M_cpd11499_c0 => 1.000000 M_cpd11493_c0 + 1.000000 M_cpd00011_c0 + 1.000000 M_cpd11500_c0		0.0234804	0.0234804	0.0234804	0.0234804	0.0234804	0.0234804	0.0234804	0.0234804	0.0234804	0.0234804	0.00313481	0.00313481
R_rxn05364_c0	6-methyl-3-oxo-octanoyl-ACP:NADP+ oxidoreductase	1.000000 H+[c0] + 1.000000 NADPH[c0] + 1.000000 6-methyl-3-oxo-octanoyl-ACP[c0] <=> 1.000000 NADP[c0] + 1.000000 6-methyl-3-hydroxy-octanoyl-ACP[c0]	1.000000 M_cpd00067_c0 + 1.000000 M_cpd00005_c0 + 1.000000 M_cpd11500_c0 <=> 1.000000 M_cpd00006_c0 + 1.000000 M_cpd11501_c0		0.0234804	0.0234804	0.0234804	0.0234804	0.0234804	0.0234804	0.0234804	0.0234804	0.0234804	0.0234804	0.00313481	0.00313481
R_rxn05365_c0	6-methyl-3-hydroxy-octanoyl-ACP hydro-lyase	1.000000 6-methyl-3-hydroxy-octanoyl-ACP[c0] => 1.000000 H2O[c0] + 1.000000 6-methyl-trans-oct-2-enoyl-ACP[c0]	1.000000 M_cpd11501_c0 => 1.000000 M_cpd00001_c0 + 1.000000 M_cpd11502_c0		0.0234804	0.0234804	0.0234804	0.0234804	0.0234804	0.0234804	0.0234804	0.0234804	0.0234804	0.0234804	0.00313481	0.00313481
R_rxn05367_c0	6-methyl-octanoyl-ACP:malonyl-[acyl-carrier-protein] C-acyltransferase (decarboxylating)	1.000000 Malonyl-acyl-carrierprotein-[c0] + 1.000000 6-methyl-octanoyl-ACP[c0] => 1.000000 ACP[c0] + 1.000000 CO2[c0] + 1.000000 8-methyl-3-oxo-decanoyl-ACP[c0]	1.000000 M_cpd11492_c0 + 1.000000 M_cpd11503_c0 => 1.000000 M_cpd11493_c0 + 1.000000 M_cpd00011_c0 + 1.000000 M_cpd11504_c0		0.0234804	0.0234804	0.0234804	0.0234804	0.0234804	0.0234804	0.0234804	0.0234804	0.0234804	0.0234804	0.00313481	0.00313481
R_rxn05368_c0	8-methyl-3-oxo-decanoyl-ACP:NADP+ oxidoreductase	1.000000 H+[c0] + 1.000000 8-methyl-3-oxo-decanoyl-ACP[c0] + 1.000000 NADPH[c0] <=> 1.000000 NADP[c0] + 1.000000 8-methyl-3-hydroxy-decanoyl-ACP[c0]	1.000000 M_cpd00067_c0 + 1.000000 M_cpd11504_c0 + 1.000000 M_cpd00005_c0 <=> 1.000000 M_cpd00006_c0 + 1.000000 M_cpd11505_c0		0.0234804	0.0234804	0.0234804	0.0234804	0.0234804	0.0234804	0.0234804	0.0234804	0.0234804	0.0234804	0.00313481	0.00313481
R_rxn05369_c0	8-methyl-3-hydroxy-decanoyl-ACP hydro-lyase	1.000000 8-methyl-3-hydroxy-decanoyl-ACP[c0] => 1.000000 H2O[c0] + 1.000000 8-methyl-trans-dec-2-enoyl-ACP[c0]	1.000000 M_cpd11505_c0 => 1.000000 M_cpd00001_c0 + 1.000000 M_cpd11506_c0		0.0234804	0.0234804	0.0234804	0.0234804	0.0234804	0.0234804	0.0234804	0.0234804	0.0234804	0.0234804	0.00313481	0.00313481
R_rxn05371_c0	8-methyl-decanoyl-ACP:malonyl-[acyl-carrier-protein] C-acyltransferase (decarboxylating)	1.000000 Malonyl-acyl-carrierprotein-[c0] + 1.000000 8-methyl-decanoyl-ACP[c0] => 1.000000 ACP[c0] + 1.000000 CO2[c0] + 1.000000 10-methyl-3-oxo-dodecanoyl-ACP[c0]	1.000000 M_cpd11492_c0 + 1.000000 M_cpd11507_c0 => 1.000000 M_cpd11493_c0 + 1.000000 M_cpd00011_c0 + 1.000000 M_cpd11508_c0		0.0234804	0.0234804	0.0234804	0.0234804	0.0234804	0.0234804	0.0234804	0.0234804	0.0234804	0.0234804	0.00313481	0.00313481
R_rxn05372_c0	10-methyl-3-oxo-dodecanoyl-ACP:NADP+ oxidoreductase	1.000000 H+[c0] + 1.000000 NADPH[c0] + 1.000000 10-methyl-3-oxo-dodecanoyl-ACP[c0] <=> 1.000000 NADP[c0] + 1.000000 10-methyl-3-hydroxy-dodecanoyl-ACP[c0]	1.000000 M_cpd00067_c0 + 1.000000 M_cpd00005_c0 + 1.000000 M_cpd11508_c0 <=> 1.000000 M_cpd00006_c0 + 1.000000 M_cpd11509_c0		0.0234804	0.0234804	0.0234804	0.0234804	0.0234804	0.0234804	0.0234804	0.0234804	0.0234804	0.0234804	0.00313481	0.00313481
R_rxn05373_c0	10-methyl-3-hydroxy-dodecanoyl-ACP hydro-lyase	1.000000 10-methyl-3-hydroxy-dodecanoyl-ACP[c0] => 1.000000 H2O[c0] + 1.000000 10-methyl-trans-dodec-2-enoyl-ACP[c0]	1.000000 M_cpd11509_c0 => 1.000000 M_cpd00001_c0 + 1.000000 M_cpd11510_c0		0.0234804	0.0234804	0.0234804	0.0234804	0.0234804	0.0234804	0.0234804	0.0234804	0.0234804	0.0234804	0.00313481	0.00313481
R_rxn05375_c0	10-methyl-dodecanoyl-ACP:malonyl-[acyl-carrier-protein] C-acyltransferase (decarboxylating)	1.000000 Malonyl-acyl-carrierprotein-[c0] + 1.000000 10-methyl-dodecanoyl-ACP[c0] => 1.000000 ACP[c0] + 1.000000 CO2[c0] + 1.000000 12-methyl-3-oxo-tetra-decanoyl-ACP[c0]	1.000000 M_cpd11492_c0 + 1.000000 M_cpd11511_c0 => 1.000000 M_cpd11493_c0 + 1.000000 M_cpd00011_c0 + 1.000000 M_cpd11512_c0		0.0234804	0.0234804	0.0234804	0.0234804	0.0234804	0.0234804	0.0234804	0.0234804	0.0234804	0.0234804	0.00313481	0.00313481
R_rxn05376_c0	12-methyl-3-oxo-tetra-decanoyl-ACP:NADP+ oxidoreductase	1.000000 H+[c0] + 1.000000 NADPH[c0] + 1.000000 12-methyl-3-oxo-tetra-decanoyl-ACP[c0] <=> 1.000000 NADP[c0] + 1.000000 12-methyl-3-hydroxy-tetra-decanoyl-ACP[c0]	1.000000 M_cpd00067_c0 + 1.000000 M_cpd00005_c0 + 1.000000 M_cpd11512_c0 <=> 1.000000 M_cpd00006_c0 + 1.000000 M_cpd11513_c0		0.0234804	0.0234804	0.0234804	0.0234804	0.0234804	0.0234804	0.0234804	0.0234804	0.0234804	0.0234804	0.00313481	0.00313481
R_rxn05377_c0	12-methyl-3-hydroxy-tetra-decanoyl-ACP hydro-lyase	1.000000 12-methyl-3-hydroxy-tetra-decanoyl-ACP[c0] => 1.000000 H2O[c0] + 1.000000 12-methyl-trans-tetra-dec-2-enoyl-ACP[c0]	1.000000 M_cpd11513_c0 => 1.000000 M_cpd00001_c0 + 1.000000 M_cpd11514_c0		0.0234804	0.0234804	0.0234804	0.0234804	0.0234804	0.0234804	0.0234804	0.0234804	0.0234804	0.0234804	0.00313481	0.00313481
R_rxn05379_c0	12-methyl-tetra-decanoyl-ACP:malonyl-[acyl-carrier-protein] C-acyltransferase (decarboxylating)	1.000000 Malonyl-acyl-carrierprotein-[c0] + 1.000000 12-methyl-tetra-decanoyl-ACP[c0] => 1.000000 ACP[c0] + 1.000000 CO2[c0] + 1.000000 14-methyl-3-oxo-hexa-decanoyl-ACP[c0]	1.000000 M_cpd11492_c0 + 1.000000 M_cpd11515_c0 => 1.000000 M_cpd11493_c0 + 1.000000 M_cpd00011_c0 + 1.000000 M_cpd11516_c0		0.0234804	0.0234804	0.0234804	0.0234804	0.0234804	0.0234804	0.0234804	0.0234804	0.0234804	0.0234804	0.00313481	0.00313481
R_rxn05380_c0	14-methyl-3-oxo-hexa-decanoyl-ACP:NADP+ oxidoreductase	1.000000 H+[c0] + 1.000000 NADPH[c0] + 1.000000 14-methyl-3-oxo-hexa-decanoyl-ACP[c0] <=> 1.000000 NADP[c0] + 1.000000 14-methyl-3-hydroxy-hexa-decanoyl-ACP[c0]	1.000000 M_cpd00067_c0 + 1.000000 M_cpd00005_c0 + 1.000000 M_cpd11516_c0 <=> 1.000000 M_cpd00006_c0 + 1.000000 M_cpd11517_c0		0.0234804	0.0234804	0.0234804	0.0234804	0.0234804	0.0234804	0.0234804	0.0234804	0.0234804	0.0234804	0.00313481	0.00313481
R_rxn05381_c0	14-methyl-3-hydroxy-hexa-decanoyl-ACP hydro-lyase	1.000000 14-methyl-3-hydroxy-hexa-decanoyl-ACP[c0] => 1.000000 H2O[c0] + 1.000000 14-methyl-trans-hexa-dec-2-enoyl-ACP[c0]	1.000000 M_cpd11517_c0 => 1.000000 M_cpd00001_c0 + 1.000000 M_cpd11518_c0		0.0234804	0.0234804	0.0234804	0.0234804	0.0234804	0.0234804	0.0234804	0.0234804	0.0234804	0.0234804	0.00313481	0.00313481
R_rxn05383_c0	3-methylbutanoyl-CoA:[acyl-carrier-protein] transferase	1.000000 ACP[c0] + 1.000000 Isovaleryl-CoA[c0] <=> 1.000000 H+[c0] + 1.000000 CoA[c0] + 1.000000 isovaleryl-ACP[c0]	1.000000 M_cpd11493_c0 + 1.000000 M_cpd01882_c0 <=> 1.000000 M_cpd00067_c0 + 1.000000 M_cpd00010_c0 + 1.000000 M_cpd11520_c0		0.0866162	0.0866162	0.0866162	0.0866162	0.0866162	0.0866162	0.0866162	0.0866162	0.0866162	0.0866162	0.0115639	0.0115639
R_rxn05384_c0	3-methylbutanoyl-ACP:malonyl-[acyl-carrier-protein] C-acyltransferase (decarboxylating)	1.000000 Malonyl-acyl-carrierprotein-[c0] + 1.000000 isovaleryl-ACP[c0] => 1.000000 ACP[c0] + 1.000000 CO2[c0] + 1.000000 5-methyl-3-oxo-hexanoyl-ACP[c0]	1.000000 M_cpd11492_c0 + 1.000000 M_cpd11520_c0 => 1.000000 M_cpd11493_c0 + 1.000000 M_cpd00011_c0 + 1.000000 M_cpd11521_c0		0.0866162	0.0866162	0.0866162	0.0866162	0.0866162	0.0866162	0.0866162	0.0866162	0.0866162	0.0866162	0.0115639	0.0115639
R_rxn05385_c0	5-methyl-3-oxo-hexanoyl-ACP:NADP+ oxidoreductase	1.000000 H+[c0] + 1.000000 NADPH[c0] + 1.000000 5-methyl-3-oxo-hexanoyl-ACP[c0] <=> 1.000000 NADP[c0] + 1.000000 5-methyl-3-hydroxy-hexanoyl-ACP[c0]	1.000000 M_cpd00067_c0 + 1.000000 M_cpd00005_c0 + 1.000000 M_cpd11521_c0 <=> 1.000000 M_cpd00006_c0 + 1.000000 M_cpd11522_c0		0.0866162	0.0866162	0.0866162	0.0866162	0.0866162	0.0866162	0.0866162	0.0866162	0.0866162	0.0866162	0.0115639	0.0115639
R_rxn05386_c0	5-methyl-3-hydroxy-hexanoyl-ACP hydro-lyase	1.000000 5-methyl-3-hydroxy-hexanoyl-ACP[c0] => 1.000000 H2O[c0] + 1.000000 5-methyl-trans-hex-2-enoyl-ACP[c0]	1.000000 M_cpd11522_c0 => 1.000000 M_cpd00001_c0 + 1.000000 M_cpd11523_c0		0.0866162	0.0866162	0.0866162	0.0866162	0.0866162	0.0866162	0.0866162	0.0866162	0.0866162	0.0866162	0.0115639	0.0115639
R_rxn05388_c0	5-methyl-hexanoyl-ACP:malonyl-[acyl-carrier-protein] C-acyltransferase (decarboxylating)	1.000000 Malonyl-acyl-carrierprotein-[c0] + 1.000000 5-methyl-hexanoyl-ACP[c0] => 1.000000 ACP[c0] + 1.000000 CO2[c0] + 1.000000 7-methyl-3-oxo-octanoyl-ACP[c0]	1.000000 M_cpd11492_c0 + 1.000000 M_cpd11524_c0 => 1.000000 M_cpd11493_c0 + 1.000000 M_cpd00011_c0 + 1.000000 M_cpd11525_c0		0.0866162	0.0866162	0.0866162	0.0866162	0.0866162	0.0866162	0.0866162	0.0866162	0.0866162	0.0866162	0.0115639	0.0115639
R_rxn05389_c0	7-methyl-3-oxo-octanoyl-ACP:NADP+ oxidoreductase	1.000000 H+[c0] + 1.000000 NADPH[c0] + 1.000000 7-methyl-3-oxo-octanoyl-ACP[c0] <=> 1.000000 NADP[c0] + 1.000000 7-methyl-3-hydroxy-octanoyl-ACP[c0]	1.000000 M_cpd00067_c0 + 1.000000 M_cpd00005_c0 + 1.000000 M_cpd11525_c0 <=> 1.000000 M_cpd00006_c0 + 1.000000 M_cpd11526_c0		0.0866162	0.0866162	0.0866162	0.0866162	0.0866162	0.0866162	0.0866162	0.0866162	0.0866162	0.0866162	0.0115639	0.0115639
R_rxn05390_c0	7-methyl-3-hydroxy-octanoyl-ACP hydro-lyase	1.000000 7-methyl-3-hydroxy-octanoyl-ACP[c0] => 1.000000 H2O[c0] + 1.000000 7-methyl-trans-oct-2-enoyl-ACP[c0]	1.000000 M_cpd11526_c0 => 1.000000 M_cpd00001_c0 + 1.000000 M_cpd11527_c0		0.0866162	0.0866162	0.0866162	0.0866162	0.0866162	0.0866162	0.0866162	0.0866162	0.0866162	0.0866162	0.0115639	0.0115639
R_rxn05392_c0	7-methyl-octanoyl-ACP:malonyl-[acyl-carrier-protein] C-acyltransferase (decarboxylating)	1.000000 7-methyl-octanoyl-ACP[c0] + 1.000000 Malonyl-acyl-carrierprotein-[c0] => 1.000000 ACP[c0] + 1.000000 CO2[c0] + 1.000000 9-methyl-3-oxo-decanoyl-ACP[c0]	1.000000 M_cpd11528_c0 + 1.000000 M_cpd11492_c0 => 1.000000 M_cpd11493_c0 + 1.000000 M_cpd00011_c0 + 1.000000 M_cpd11529_c0		0.0866162	0.0866162	0.0866162	0.0866162	0.0866162	0.0866162	0.0866162	0.0866162	0.0866162	0.0866162	0.0115639	0.0115639
R_rxn05393_c0	9-methyl-3-oxo-decanoyl-ACP:NADP+ oxidoreductase	1.000000 H+[c0] + 1.000000 9-methyl-3-oxo-decanoyl-ACP[c0] + 1.000000 NADPH[c0] <=> 1.000000 NADP[c0] + 1.000000 9-methyl-3-hydroxy-decanoyl-ACP[c0]	1.000000 M_cpd00067_c0 + 1.000000 M_cpd11529_c0 + 1.000000 M_cpd00005_c0 <=> 1.000000 M_cpd00006_c0 + 1.000000 M_cpd11530_c0		0.0866162	0.0866162	0.0866162	0.0866162	0.0866162	0.0866162	0.0866162	0.0866162	0.0866162	0.0866162	0.0115639	0.0115639
R_rxn05394_c0	9-methyl-3-hydroxy-decanoyl-ACP hydro-lyase	1.000000 9-methyl-3-hydroxy-decanoyl-ACP[c0] => 1.000000 H2O[c0] + 1.000000 9-methyl-trans-dec-2-enoyl-ACP[c0]	1.000000 M_cpd11530_c0 => 1.000000 M_cpd00001_c0 + 1.000000 M_cpd11531_c0		0.0866162	0.0866162	0.0866162	0.0866162	0.0866162	0.0866162	0.0866162	0.0866162	0.0866162	0.0866162	0.0115639	0.0115639
R_rxn05396_c0	9-methyl-decanoyl-ACP:malonyl-[acyl-carrier-protein] C-acyltransferase (decarboxylating)	1.000000 Malonyl-acyl-carrierprotein-[c0] + 1.000000 9-methyl-decanoyl-ACP[c0] => 1.000000 ACP[c0] + 1.000000 CO2[c0] + 1.000000 11-methyl-3-oxo-dodecanoyl-ACP[c0]	1.000000 M_cpd11492_c0 + 1.000000 M_cpd11532_c0 => 1.000000 M_cpd11493_c0 + 1.000000 M_cpd00011_c0 + 1.000000 M_cpd11533_c0		0.0866162	0.0866162	0.0866162	0.0866162	0.0866162	0.0866162	0.0866162	0.0866162	0.0866162	0.0866162	0.0115639	0.0115639
R_rxn05397_c0	11-methyl-3-oxo-dodecanoyl-ACP:NADP+ oxidoreductase	1.000000 H+[c0] + 1.000000 NADPH[c0] + 1.000000 11-methyl-3-oxo-dodecanoyl-ACP[c0] <=> 1.000000 NADP[c0] + 1.000000 11-methyl-3-hydroxy-dodecanoyl-ACP[c0]	1.000000 M_cpd00067_c0 + 1.000000 M_cpd00005_c0 + 1.000000 M_cpd11533_c0 <=> 1.000000 M_cpd00006_c0 + 1.000000 M_cpd11534_c0		0.0866162	0.0866162	0.0866162	0.0866162	0.0866162	0.0866162	0.0866162	0.0866162	0.0866162	0.0866162	0.0115639	0.0115639
R_rxn05398_c0	11-methyl-3-hydroxy-dodecanoyl-ACP hydro-lyase	1.000000 11-methyl-3-hydroxy-dodecanoyl-ACP[c0] => 1.000000 H2O[c0] + 1.000000 11-methyl-trans-dodec-2-enoyl-ACP[c0]	1.000000 M_cpd11534_c0 => 1.000000 M_cpd00001_c0 + 1.000000 M_cpd11535_c0		0.0866162	0.0866162	0.0866162	0.0866162	0.0866162	0.0866162	0.0866162	0.0866162	0.0866162	0.0866162	0.0115639	0.0115639
R_rxn05400_c0	11-methyl-dodecanoyl-ACP:malonyl-[acyl-carrier-protein] C-acyltransferase (decarboxylating)	1.000000 Malonyl-acyl-carrierprotein-[c0] + 1.000000 11-methyl-dodecanoyl-ACP[c0] => 1.000000 ACP[c0] + 1.000000 CO2[c0] + 1.000000 13-methyl-3-oxo-tetra-decanoyl-ACP[c0]	1.000000 M_cpd11492_c0 + 1.000000 M_cpd11536_c0 => 1.000000 M_cpd11493_c0 + 1.000000 M_cpd00011_c0 + 1.000000 M_cpd11537_c0		0.0866162	0.0866162	0.0866162	0.0866162	0.0866162	0.0866162	0.0866162	0.0866162	0.0866162	0.0866162	0.0115639	0.0115639
R_rxn05401_c0	13-methyl-3-oxo-tetra-decanoyl-ACP:NADP+ oxidoreductase	1.000000 H+[c0] + 1.000000 NADPH[c0] + 1.000000 13-methyl-3-oxo-tetra-decanoyl-ACP[c0] <=> 1.000000 NADP[c0] + 1.000000 13-methyl-3-hydroxy-tetra-decanoyl-ACP[c0]	1.000000 M_cpd00067_c0 + 1.000000 M_cpd00005_c0 + 1.000000 M_cpd11537_c0 <=> 1.000000 M_cpd00006_c0 + 1.000000 M_cpd11538_c0		0.0866162	0.0866162	0.0866162	0.0866162	0.0866162	0.0866162	0.0866162	0.0866162	0.0866162	0.0866162	0.0115639	0.0115639
R_rxn05402_c0	13-methyl-3-hydroxy-tetra-decanoyl-ACP hydro-lyase	1.000000 13-methyl-3-hydroxy-tetra-decanoyl-ACP[c0] => 1.000000 H2O[c0] + 1.000000 13-methyl-trans-tetra-dec-2-enoyl-ACP[c0]	1.000000 M_cpd11538_c0 => 1.000000 M_cpd00001_c0 + 1.000000 M_cpd11539_c0		0.0866162	0.0866162	0.0866162	0.0866162	0.0866162	0.0866162	0.0866162	0.0866162	0.0866162	0.0866162	0.0115639	0.0115639
R_rxn05404_c0	13-methyl-tetra-decanoyl-ACP:malonyl-[acyl-carrier-protein] C-acyltransferase (decarboxylating)	1.000000 Malonyl-acyl-carrierprotein-[c0] + 1.000000 13-methyl-tetra-decanoyl-ACP[c0] => 1.000000 ACP[c0] + 1.000000 CO2[c0] + 1.000000 15-methyl-3-oxo-hexa-decanoyl-ACP[c0]	1.000000 M_cpd11492_c0 + 1.000000 M_cpd11540_c0 => 1.000000 M_cpd11493_c0 + 1.000000 M_cpd00011_c0 + 1.000000 M_cpd11541_c0		0.0866162	0.0866162	0.0866162	0.0866162	0.0866162	0.0866162	0.0866162	0.0866162	0.0866162	0.0866162	0.0115639	0.0115639
R_rxn05405_c0	15-methyl-3-oxo-hexa-decanoyl-ACP:NADP+ oxidoreductase	1.000000 H+[c0] + 1.000000 NADPH[c0] + 1.000000 15-methyl-3-oxo-hexa-decanoyl-ACP[c0] <=> 1.000000 NADP[c0] + 1.000000 15-methyl-3-hydroxy-hexa-decanoyl-ACP[c0]	1.000000 M_cpd00067_c0 + 1.000000 M_cpd00005_c0 + 1.000000 M_cpd11541_c0 <=> 1.000000 M_cpd00006_c0 + 1.000000 M_cpd11542_c0		0.0866162	0.0866162	0.0866162	0.0866162	0.0866162	0.0866162	0.0866162	0.0866162	0.0866162	0.0866162	0.0115639	0.0115639
R_rxn05406_c0	15-methyl-3-hydroxy-hexa-decanoyl-ACP hydro-lyase	1.000000 15-methyl-3-hydroxy-hexa-decanoyl-ACP[c0] => 1.000000 H2O[c0] + 1.000000 15-methyl-trans-hexa-dec-2-enoyl-ACP[c0]	1.000000 M_cpd11542_c0 => 1.000000 M_cpd00001_c0 + 1.000000 M_cpd11543_c0		0.0866162	0.0866162	0.0866162	0.0866162	0.0866162	0.0866162	0.0866162	0.0866162	0.0866162	0.0866162	0.0115639	0.0115639
R_rxn05408_c0	2-methylpropionyl-CoA:[acyl-carrier-protein] transferase	1.000000 Isobutyryl-CoA[c0] + 1.000000 ACP[c0] <=> 1.000000 H+[c0] + 1.000000 CoA[c0] + 1.000000 isobutyryl-ACP[c0]	1.000000 M_cpd00481_c0 + 1.000000 M_cpd11493_c0 <=> 1.000000 M_cpd00067_c0 + 1.000000 M_cpd00010_c0 + 1.000000 M_cpd11545_c0		0	0	0	0	0	0	0	0	0	0	0	0
R_rxn05409_c0	2-methylpropionyl-ACP:malonyl-[acyl-carrier-protein] C-acyltransferase (decarboxylating)	1.000000 Malonyl-acyl-carrierprotein-[c0] + 1.000000 isobutyryl-ACP[c0] => 1.000000 ACP[c0] + 1.000000 CO2[c0] + 1.000000 4-methyl-3-oxo-pentanoyl-ACP[c0]	1.000000 M_cpd11492_c0 + 1.000000 M_cpd11545_c0 => 1.000000 M_cpd11493_c0 + 1.000000 M_cpd00011_c0 + 1.000000 M_cpd11546_c0		0	0	0	0	0	0	0	0	0	0	0	0
R_rxn05410_c0	4-methyl-3-oxo-pentanoyl-ACP:NADP+ oxidoreductase	1.000000 H+[c0] + 1.000000 NADPH[c0] + 1.000000 4-methyl-3-oxo-pentanoyl-ACP[c0] <=> 1.000000 NADP[c0] + 1.000000 4-methyl-3-hydroxy-pentanoyl-ACP[c0]	1.000000 M_cpd00067_c0 + 1.000000 M_cpd00005_c0 + 1.000000 M_cpd11546_c0 <=> 1.000000 M_cpd00006_c0 + 1.000000 M_cpd11547_c0		0	0	0	0	0	0	0	0	0	0	0	0
R_rxn05413_c0	4-methyl-pentanoyl-ACP:malonyl-[acyl-carrier-protein] C-acyltransferase (decarboxylating)	1.000000 Malonyl-acyl-carrierprotein-[c0] + 1.000000 4-methyl-pentanoyl-ACP[c0] => 1.000000 ACP[c0] + 1.000000 CO2[c0] + 1.000000 6-methyl-3-oxo-heptanoyl-ACP[c0]	1.000000 M_cpd11492_c0 + 1.000000 M_cpd11549_c0 => 1.000000 M_cpd11493_c0 + 1.000000 M_cpd00011_c0 + 1.000000 M_cpd11550_c0		0	0	0	0	0	0	0	0	0	0	0	0
R_rxn05414_c0	6-methyl-3-oxo-heptanoyl-ACP:NADP+ oxidoreductase	1.000000 H+[c0] + 1.000000 NADPH[c0] + 1.000000 6-methyl-3-oxo-heptanoyl-ACP[c0] <=> 1.000000 NADP[c0] + 1.000000 6-methyl-3-hydroxy-heptanoyl-ACP[c0]	1.000000 M_cpd00067_c0 + 1.000000 M_cpd00005_c0 + 1.000000 M_cpd11550_c0 <=> 1.000000 M_cpd00006_c0 + 1.000000 M_cpd11551_c0		0	0	0	0	0	0	0	0	0	0	0	0
R_rxn05417_c0	6-methyl-heptanoyl-ACP:malonyl-[acyl-carrier-protein] C-acyltransferase (decarboxylating)	1.000000 Malonyl-acyl-carrierprotein-[c0] + 1.000000 6-methyl-heptanoyl-ACP[c0] => 1.000000 ACP[c0] + 1.000000 CO2[c0] + 1.000000 8-methyl-3-oxo-nonanoyl-ACP[c0]	1.000000 M_cpd11492_c0 + 1.000000 M_cpd11553_c0 => 1.000000 M_cpd11493_c0 + 1.000000 M_cpd00011_c0 + 1.000000 M_cpd11554_c0		0	0	0	0	0	0	0	0	0	0	0	0
R_rxn05418_c0	8-methyl-3-oxo-nonanoyl-ACP:NADP+ oxidoreductase	1.000000 H+[c0] + 1.000000 NADPH[c0] + 1.000000 8-methyl-3-oxo-nonanoyl-ACP[c0] <=> 1.000000 NADP[c0] + 1.000000 8-methyl-3-hydroxy-nonanoyl-ACP[c0]	1.000000 M_cpd00067_c0 + 1.000000 M_cpd00005_c0 + 1.000000 M_cpd11554_c0 <=> 1.000000 M_cpd00006_c0 + 1.000000 M_cpd11555_c0		0	0	0	0	0	0	0	0	0	0	0	0
R_rxn05421_c0	8-methyl-nonanoyl-ACP:malonyl-[acyl-carrier-protein] C-acyltransferase (decarboxylating)	1.000000 Malonyl-acyl-carrierprotein-[c0] + 1.000000 8-methyl-nonanoyl-ACP[c0] => 1.000000 ACP[c0] + 1.000000 CO2[c0] + 1.000000 10-methyl-3-oxo-undecanoyl-ACP[c0]	1.000000 M_cpd11492_c0 + 1.000000 M_cpd11557_c0 => 1.000000 M_cpd11493_c0 + 1.000000 M_cpd00011_c0 + 1.000000 M_cpd11558_c0		0	0	0	0	0	0	0	0	0	0	0	0
R_rxn05422_c0	10-methyl-3-oxo-undecanoyl-ACP:NADP+ oxidoreductase	1.000000 H+[c0] + 1.000000 NADPH[c0] + 1.000000 10-methyl-3-oxo-undecanoyl-ACP[c0] <=> 1.000000 NADP[c0] + 1.000000 10-methyl-3-hydroxy-undecanoyl-ACP[c0]	1.000000 M_cpd00067_c0 + 1.000000 M_cpd00005_c0 + 1.000000 M_cpd11558_c0 <=> 1.000000 M_cpd00006_c0 + 1.000000 M_cpd11559_c0		0	0	0	0	0	0	0	0	0	0	0	0
R_rxn05425_c0	10-methyl-undecanoyl-ACP:malonyl-[acyl-carrier-protein] C-acyltransferase (decarboxylating)	1.000000 Malonyl-acyl-carrierprotein-[c0] + 1.000000 10-methyl-undecanoyl-ACP[c0] => 1.000000 ACP[c0] + 1.000000 CO2[c0] + 1.000000 12-methyl-3-oxo-tridecanoyl-ACP[c0]	1.000000 M_cpd11492_c0 + 1.000000 M_cpd11561_c0 => 1.000000 M_cpd11493_c0 + 1.000000 M_cpd00011_c0 + 1.000000 M_cpd11562_c0		0	0	0	0	0	0	0	0	0	0	0	0
R_rxn05426_c0	12-methyl-3-oxo-tridecanoyl-ACP:NADP+ oxidoreductase	1.000000 H+[c0] + 1.000000 NADPH[c0] + 1.000000 12-methyl-3-oxo-tridecanoyl-ACP[c0] <=> 1.000000 NADP[c0] + 1.000000 12-methyl-3-hydroxy-tridecanoyl-ACP[c0]	1.000000 M_cpd00067_c0 + 1.000000 M_cpd00005_c0 + 1.000000 M_cpd11562_c0 <=> 1.000000 M_cpd00006_c0 + 1.000000 M_cpd11563_c0		0	0	0	0	0	0	0	0	0	0	0	0
R_rxn05429_c0	12-methyl-tridecanoyl-ACP:malonyl-[acyl-carrier-protein] C-acyltransferase (decarboxylating)	1.000000 Malonyl-acyl-carrierprotein-[c0] + 1.000000 12-methyl-tridecanoyl-ACP[c0] => 1.000000 ACP[c0] + 1.000000 CO2[c0] + 1.000000 14-methyl-3-oxo-pentadecanoyl-ACP[c0]	1.000000 M_cpd11492_c0 + 1.000000 M_cpd11565_c0 => 1.000000 M_cpd11493_c0 + 1.000000 M_cpd00011_c0 + 1.000000 M_cpd11566_c0		0	0	0	0	0	0	0	0	0	0	0	0
R_rxn05430_c0	14-methyl-3-oxo-pentadecanoyl-ACP:NADP+ oxidoreductase	1.000000 H+[c0] + 1.000000 NADPH[c0] + 1.000000 14-methyl-3-oxo-pentadecanoyl-ACP[c0] <=> 1.000000 NADP[c0] + 1.000000 14-methyl-3-hydroxy-pentadecanoyl-ACP[c0]	1.000000 M_cpd00067_c0 + 1.000000 M_cpd00005_c0 + 1.000000 M_cpd11566_c0 <=> 1.000000 M_cpd00006_c0 + 1.000000 M_cpd11567_c0		0	0	0	0	0	0	0	0	0	0	0	0
R_rxn05431_c0	14-methyl-3-hydroxy-pentadecanoyl-ACP hydro-lyase	1 14-methyl-3-hydroxy-pentadecanoyl-ACP[c0] <=> 1 H2O[c0] + 1 14-methyl-trans-pentadec-2-enoyl-ACP[c0]	1 M_cpd11567_c0 <=> 1 M_cpd00001_c0 + 1 M_cpd11568_c0		0	0	0	0	0	0	0	0	0	0	0	0
R_rxn05433_c0	4-methyl-trans-hex-2-enoyl-ACP:NAD+ oxidoreductase (A-specific)	1.000000 H+[c0] + 1.000000 NADH[c0] + 1.000000 4-methyl-trans-hex-2-enoyl-ACP[c0] => 1.000000 NAD[c0] + 1.000000 4-methyl-hexanoyl-ACP[c0]	1.000000 M_cpd00067_c0 + 1.000000 M_cpd00004_c0 + 1.000000 M_cpd11498_c0 => 1.000000 M_cpd00003_c0 + 1.000000 M_cpd11499_c0		0.0234804	0.0234804	0.0234804	0.0234804	0.0234804	0.0234804	0.0234804	0.0234804	0.0234804	0.0234804	0.00313481	0.00313481
R_rxn05434_c0	6-methyl-trans-oct-2-enoyl-ACP:NAD+ oxidoreductase (A-specific)	1.000000 H+[c0] + 1.000000 NADH[c0] + 1.000000 6-methyl-trans-oct-2-enoyl-ACP[c0] => 1.000000 NAD[c0] + 1.000000 6-methyl-octanoyl-ACP[c0]	1.000000 M_cpd00067_c0 + 1.000000 M_cpd00004_c0 + 1.000000 M_cpd11502_c0 => 1.000000 M_cpd00003_c0 + 1.000000 M_cpd11503_c0		0.0234804	0.0234804	0.0234804	0.0234804	0.0234804	0.0234804	0.0234804	0.0234804	0.0234804	0.0234804	0.00313481	0.00313481
R_rxn05435_c0	8-methyl-trans-dec-2-enoyl-ACP:NAD+ oxidoreductase (A-specific)	1.000000 H+[c0] + 1.000000 NADH[c0] + 1.000000 8-methyl-trans-dec-2-enoyl-ACP[c0] => 1.000000 NAD[c0] + 1.000000 8-methyl-decanoyl-ACP[c0]	1.000000 M_cpd00067_c0 + 1.000000 M_cpd00004_c0 + 1.000000 M_cpd11506_c0 => 1.000000 M_cpd00003_c0 + 1.000000 M_cpd11507_c0		0.0234804	0.0234804	0.0234804	0.0234804	0.0234804	0.0234804	0.0234804	0.0234804	0.0234804	0.0234804	0.00313481	0.00313481
R_rxn05436_c0	10-methyl-trans-dodec-2-enoyl-ACP:NAD+ oxidoreductase (A-specific)	1.000000 H+[c0] + 1.000000 NADH[c0] + 1.000000 10-methyl-trans-dodec-2-enoyl-ACP[c0] => 1.000000 NAD[c0] + 1.000000 10-methyl-dodecanoyl-ACP[c0]	1.000000 M_cpd00067_c0 + 1.000000 M_cpd00004_c0 + 1.000000 M_cpd11510_c0 => 1.000000 M_cpd00003_c0 + 1.000000 M_cpd11511_c0		0.0234804	0.0234804	0.0234804	0.0234804	0.0234804	0.0234804	0.0234804	0.0234804	0.0234804	0.0234804	0.00313481	0.00313481
R_rxn05437_c0	12-methyl-trans-tetra-dec-2-enoyl-ACP:NAD+ oxidoreductase (A-specific)	1.000000 H+[c0] + 1.000000 NADH[c0] + 1.000000 12-methyl-trans-tetra-dec-2-enoyl-ACP[c0] => 1.000000 NAD[c0] + 1.000000 12-methyl-tetra-decanoyl-ACP[c0]	1.000000 M_cpd00067_c0 + 1.000000 M_cpd00004_c0 + 1.000000 M_cpd11514_c0 => 1.000000 M_cpd00003_c0 + 1.000000 M_cpd11515_c0		0.0234804	0.0234804	0.0234804	0.0234804	0.0234804	0.0234804	0.0234804	0.0234804	0.0234804	0.0234804	0.00313481	0.00313481
R_rxn05438_c0	14-methyl-trans-hexa-dec-2-enoyl-ACP:NAD+ oxidoreductase (A-specific)	1.000000 H+[c0] + 1.000000 NADH[c0] + 1.000000 14-methyl-trans-hexa-dec-2-enoyl-ACP[c0] => 1.000000 NAD[c0] + 1.000000 14-methyl-hexa-decanoyl-ACP[c0]	1.000000 M_cpd00067_c0 + 1.000000 M_cpd00004_c0 + 1.000000 M_cpd11518_c0 => 1.000000 M_cpd00003_c0 + 1.000000 M_cpd11519_c0		0.0234804	0.0234804	0.0234804	0.0234804	0.0234804	0.0234804	0.0234804	0.0234804	0.0234804	0.0234804	0.00313481	0.00313481
R_rxn05439_c0	5-methyl-trans-hex-2-enoyl-ACP:NAD+ oxidoreductase (A-specific)	1.000000 H+[c0] + 1.000000 NADH[c0] + 1.000000 5-methyl-trans-hex-2-enoyl-ACP[c0] => 1.000000 NAD[c0] + 1.000000 5-methyl-hexanoyl-ACP[c0]	1.000000 M_cpd00067_c0 + 1.000000 M_cpd00004_c0 + 1.000000 M_cpd11523_c0 => 1.000000 M_cpd00003_c0 + 1.000000 M_cpd11524_c0		0.0866162	0.0866162	0.0866162	0.0866162	0.0866162	0.0866162	0.0866162	0.0866162	0.0866162	0.0866162	0.0115639	0.0115639
R_rxn05440_c0	7-methyl-trans-oct-2-enoyl-ACP:NAD+ oxidoreductase (A-specific)	1.000000 H+[c0] + 1.000000 NADH[c0] + 1.000000 7-methyl-trans-oct-2-enoyl-ACP[c0] => 1.000000 NAD[c0] + 1.000000 7-methyl-octanoyl-ACP[c0]	1.000000 M_cpd00067_c0 + 1.000000 M_cpd00004_c0 + 1.000000 M_cpd11527_c0 => 1.000000 M_cpd00003_c0 + 1.000000 M_cpd11528_c0		0.0866162	0.0866162	0.0866162	0.0866162	0.0866162	0.0866162	0.0866162	0.0866162	0.0866162	0.0866162	0.0115639	0.0115639
R_rxn05441_c0	9-methyl-trans-dec-2-enoyl-ACP:NAD+ oxidoreductase (A-specific)	1.000000 H+[c0] + 1.000000 NADH[c0] + 1.000000 9-methyl-trans-dec-2-enoyl-ACP[c0] => 1.000000 NAD[c0] + 1.000000 9-methyl-decanoyl-ACP[c0]	1.000000 M_cpd00067_c0 + 1.000000 M_cpd00004_c0 + 1.000000 M_cpd11531_c0 => 1.000000 M_cpd00003_c0 + 1.000000 M_cpd11532_c0		0.0866162	0.0866162	0.0866162	0.0866162	0.0866162	0.0866162	0.0866162	0.0866162	0.0866162	0.0866162	0.0115639	0.0115639
R_rxn05442_c0	11-methyl-trans-dodec-2-enoyl-ACP:NAD+ oxidoreductase (A-specific)	1.000000 H+[c0] + 1.000000 NADH[c0] + 1.000000 11-methyl-trans-dodec-2-enoyl-ACP[c0] => 1.000000 NAD[c0] + 1.000000 11-methyl-dodecanoyl-ACP[c0]	1.000000 M_cpd00067_c0 + 1.000000 M_cpd00004_c0 + 1.000000 M_cpd11535_c0 => 1.000000 M_cpd00003_c0 + 1.000000 M_cpd11536_c0		0.0866162	0.0866162	0.0866162	0.0866162	0.0866162	0.0866162	0.0866162	0.0866162	0.0866162	0.0866162	0.0115639	0.0115639
R_rxn05443_c0	13-methyl-trans-tetra-dec-2-enoyl-ACP:NAD+ oxidoreductase (A-specific)	1.000000 H+[c0] + 1.000000 NADH[c0] + 1.000000 13-methyl-trans-tetra-dec-2-enoyl-ACP[c0] => 1.000000 NAD[c0] + 1.000000 13-methyl-tetra-decanoyl-ACP[c0]	1.000000 M_cpd00067_c0 + 1.000000 M_cpd00004_c0 + 1.000000 M_cpd11539_c0 => 1.000000 M_cpd00003_c0 + 1.000000 M_cpd11540_c0		0.0866162	0.0866162	0.0866162	0.0866162	0.0866162	0.0866162	0.0866162	0.0866162	0.0866162	0.0866162	0.0115639	0.0115639
R_rxn05444_c0	15-methyl-trans-hexa-dec-2-enoyl-ACP:NAD+ oxidoreductase (A-specific)	1.000000 H+[c0] + 1.000000 NADH[c0] + 1.000000 15-methyl-trans-hexa-dec-2-enoyl-ACP[c0] => 1.000000 NAD[c0] + 1.000000 15-methyl-hexa-decanoyl-ACP[c0]	1.000000 M_cpd00067_c0 + 1.000000 M_cpd00004_c0 + 1.000000 M_cpd11543_c0 => 1.000000 M_cpd00003_c0 + 1.000000 M_cpd11544_c0		0.0866162	0.0866162	0.0866162	0.0866162	0.0866162	0.0866162	0.0866162	0.0866162	0.0866162	0.0866162	0.0115639	0.0115639
R_rxn05445_c0	4-methyl-trans-pent-2-enoyl-ACP:NAD+ oxidoreductase (A-specific)	1.000000 H+[c0] + 1.000000 NADH[c0] + 1.000000 4-methyl-trans-pent-2-enoyl-ACP[c0] => 1.000000 NAD[c0] + 1.000000 4-methyl-pentanoyl-ACP[c0]	1.000000 M_cpd00067_c0 + 1.000000 M_cpd00004_c0 + 1.000000 M_cpd11548_c0 => 1.000000 M_cpd00003_c0 + 1.000000 M_cpd11549_c0		0	0	0	0	0	0	0	0	0	0	0	0
R_rxn05446_c0	6-methyl-trans-hept-2-enoyl-ACP:NAD+ oxidoreductase (A-specific)	1.000000 H+[c0] + 1.000000 NADH[c0] + 1.000000 6-methyl-trans-hept-2-enoyl-ACP[c0] => 1.000000 NAD[c0] + 1.000000 6-methyl-heptanoyl-ACP[c0]	1.000000 M_cpd00067_c0 + 1.000000 M_cpd00004_c0 + 1.000000 M_cpd11552_c0 => 1.000000 M_cpd00003_c0 + 1.000000 M_cpd11553_c0		0	0	0	0	0	0	0	0	0	0	0	0
R_rxn05447_c0	8-methyl-trans-non-2-enoyl-ACP:NAD+ oxidoreductase (A-specific)	1.000000 H+[c0] + 1.000000 NADH[c0] + 1.000000 8-methyl-trans-non-2-enoyl-ACP[c0] => 1.000000 NAD[c0] + 1.000000 8-methyl-nonanoyl-ACP[c0]	1.000000 M_cpd00067_c0 + 1.000000 M_cpd00004_c0 + 1.000000 M_cpd11556_c0 => 1.000000 M_cpd00003_c0 + 1.000000 M_cpd11557_c0		0	0	0	0	0	0	0	0	0	0	0	0
R_rxn05448_c0	10-methyl-trans-undec-2-enoyl-ACP:NAD+ oxidoreductase (A-specific)	1.000000 H+[c0] + 1.000000 NADH[c0] + 1.000000 10-methyl-trans-undec-2-enoyl-ACP[c0] => 1.000000 NAD[c0] + 1.000000 10-methyl-undecanoyl-ACP[c0]	1.000000 M_cpd00067_c0 + 1.000000 M_cpd00004_c0 + 1.000000 M_cpd11560_c0 => 1.000000 M_cpd00003_c0 + 1.000000 M_cpd11561_c0		0	0	0	0	0	0	0	0	0	0	0	0
R_rxn05449_c0	12-methyl-trans-tridec-2-enoyl-ACP:NAD+ oxidoreductase (A-specific)	1.000000 H+[c0] + 1.000000 NADH[c0] + 1.000000 12-methyl-trans-tridec-2-enoyl-ACP[c0] => 1.000000 NAD[c0] + 1.000000 12-methyl-tridecanoyl-ACP[c0]	1.000000 M_cpd00067_c0 + 1.000000 M_cpd00004_c0 + 1.000000 M_cpd11564_c0 => 1.000000 M_cpd00003_c0 + 1.000000 M_cpd11565_c0		0	0	0	0	0	0	0	0	0	0	0	0
R_rxn05450_c0	14-methyl-trans-pentadec-2-enoyl-ACP:NAD+ oxidoreductase (A-specific)	1.000000 H+[c0] + 1.000000 NADH[c0] + 1.000000 14-methyl-trans-pentadec-2-enoyl-ACP[c0] => 1.000000 NAD[c0] + 1.000000 14-methyl-pentadecanoyl-ACP[c0]	1.000000 M_cpd00067_c0 + 1.000000 M_cpd00004_c0 + 1.000000 M_cpd11568_c0 => 1.000000 M_cpd00003_c0 + 1.000000 M_cpd11569_c0		0	0	0	0	0	0	0	0	0	0	0	0
R_rxn05451_c0	12-methyl-tetra-decanoyl-ACP:[acyl-carrier-protein] transferase	2.000000 H+[c0] + 1.000000 CoA[c0] + 1.000000 12-methyl-tetra-decanoyl-ACP[c0] <=> 1.000000 ACP[c0] + 1.000000 fa4coa[c0]	2.000000 M_cpd00067_c0 + 1.000000 M_cpd00010_c0 + 1.000000 M_cpd11515_c0 <=> 1.000000 M_cpd11493_c0 + 1.000000 M_cpd11439_c0		0	0	0	0	0	0	0	0	0	0	0	0
R_rxn05452_c0	14-methyl-hexa-decanoyl-ACP:[acyl-carrier-protein] transferase	2.000000 H+[c0] + 1.000000 CoA[c0] + 1.000000 14-methyl-hexa-decanoyl-ACP[c0] <=> 1.000000 ACP[c0] + 1.000000 fa12coa[c0]	2.000000 M_cpd00067_c0 + 1.000000 M_cpd00010_c0 + 1.000000 M_cpd11519_c0 <=> 1.000000 M_cpd11493_c0 + 1.000000 M_cpd11434_c0		0.0234804	0.0234804	0.0234804	0.0234804	0.0234804	0.0234804	0.0234804	0.0234804	0.0234804	0.0234804	0.00313481	0.00313481
R_rxn05453_c0	13-methyl-tetra-decanoyl-ACP:[acyl-carrier-protein] transferase	2.000000 H+[c0] + 1.000000 CoA[c0] + 1.000000 13-methyl-tetra-decanoyl-ACP[c0] <=> 1.000000 ACP[c0] + 1.000000 fa3coa[c0]	2.000000 M_cpd00067_c0 + 1.000000 M_cpd00010_c0 + 1.000000 M_cpd11540_c0 <=> 1.000000 M_cpd11493_c0 + 1.000000 M_cpd11437_c0		0	0	0	0	0	0	0	0	0	0	0	0
R_rxn05454_c0	15-methyl-hexa-decanoyl-ACP:[acyl-carrier-protein] transferase	2.000000 H+[c0] + 1.000000 CoA[c0] + 1.000000 15-methyl-hexa-decanoyl-ACP[c0] <=> 1.000000 ACP[c0] + 1.000000 fa11coa[c0]	2.000000 M_cpd00067_c0 + 1.000000 M_cpd00010_c0 + 1.000000 M_cpd11544_c0 <=> 1.000000 M_cpd11493_c0 + 1.000000 M_cpd11432_c0		0.0866162	0.0866162	0.0866162	0.0866162	0.0866162	0.0866162	0.0866162	0.0866162	0.0866162	0.0866162	0.0115639	0.0115639
R_rxn05455_c0	12-methyl-tridecanoyl-ACP:[acyl-carrier-protein] transferase	2.000000 H+[c0] + 1.000000 CoA[c0] + 1.000000 12-methyl-tridecanoyl-ACP[c0] <=> 1.000000 ACP[c0] + 1.000000 fa1coa[c0]	2.000000 M_cpd00067_c0 + 1.000000 M_cpd00010_c0 + 1.000000 M_cpd11565_c0 <=> 1.000000 M_cpd11493_c0 + 1.000000 M_cpd11435_c0		0	0	0	0	0	0	0	0	0	0	0	0
R_rxn05456_c0	14-methyl-pentadecanoyl-ACP:[acyl-carrier-protein] transferase	2.000000 H+[c0] + 1.000000 CoA[c0] + 1.000000 14-methyl-pentadecanoyl-ACP[c0] <=> 1.000000 fa6coa[c0] + 1.000000 ACP[c0]	2.000000 M_cpd00067_c0 + 1.000000 M_cpd00010_c0 + 1.000000 M_cpd11569_c0 <=> 1.000000 M_cpd11441_c0 + 1.000000 M_cpd11493_c0		0	0	0	0	0	0	0	0	0	0	0	0
R_rxn05457_c0	[Acyl-carrier-protein] acetyltransferase	1.000000 CoA[c0] + 1.000000 Myristoyl-ACP[c0] <=> 1.000000 Myristoyl-CoA[c0] + 1.000000 ACP[c0]	1.000000 M_cpd00010_c0 + 1.000000 M_cpd11466_c0 <=> 1.000000 M_cpd01695_c0 + 1.000000 M_cpd11493_c0		-13.9976	0	-8.32544	0	-8.88547	0	-131.806	0	-124.27	0	-10.4696	0
R_rxn05458_c0	[Acyl-carrier-protein] acetyltransferase	1.000000 H+[c0] + 1.000000 CoA[c0] + 1.000000 hexadecanoyl-acp[c0] <=> 1.000000 ACP[c0] + 1.000000 Palmitoyl-CoA[c0]	1.000000 M_cpd00067_c0 + 1.000000 M_cpd00010_c0 + 1.000000 M_cpd11476_c0 <=> 1.000000 M_cpd11493_c0 + 1.000000 M_cpd00134_c0		-14.1037	0	-8.43152	-0.106083	-8.99156	-0.106083	-131.912	-0.106083	-124.376	0	-10.4838	-0.014163
R_rxn05459_c0	stearyl-ACP:[acyl-carrier-protein] transferase	1.000000 H+[c0] + 1.000000 CoA[c0] + 1.000000 Octodecanoyl-ACP[c0] <=> 1.000000 ACP[c0] + 1.000000 strcoa[c0]	1.000000 M_cpd00067_c0 + 1.000000 M_cpd00010_c0 + 1.000000 M_cpd11573_c0 <=> 1.000000 M_cpd11493_c0 + 1.000000 M_cpd00327_c0		0	0	0	0	0	0	0	0	0	0	0	0
R_rxn05460_c0	3-Oxooctodecanoyl-ACP:malonyl-[acyl-carrier-protein] C-acyltransferase (decarboxylating)	1.000000 Malonyl-acyl-carrierprotein-[c0] + 1.000000 hexadecanoyl-acp[c0] => 1.000000 ACP[c0] + 1.000000 CO2[c0] + 1.000000 3-Oxooctodecanoyl-ACP[c0]	1.000000 M_cpd11492_c0 + 1.000000 M_cpd11476_c0 => 1.000000 M_cpd11493_c0 + 1.000000 M_cpd00011_c0 + 1.000000 M_cpd11570_c0		0	0	0	0	0	0	0	0	0	0	0	0
R_rxn05461_c0	3-Hydroxyoctodecanoyl-ACP:NADP+ oxidoreductase	1.000000 H+[c0] + 1.000000 NADPH[c0] + 1.000000 3-Oxooctodecanoyl-ACP[c0] <=> 1.000000 NADP[c0] + 1.000000 3-Hydroxyoctodecanoyl-ACP[c0]	1.000000 M_cpd00067_c0 + 1.000000 M_cpd00005_c0 + 1.000000 M_cpd11570_c0 <=> 1.000000 M_cpd00006_c0 + 1.000000 M_cpd11571_c0		0	0	0	0	0	0	0	0	0	0	0	0
R_rxn05464_c0	trans-Octodec-2-enoyl-ACP:NAD+ oxidoreductase (A-specific)	1.000000 H+[c0] + 1.000000 NADH[c0] + 1.000000 trans-Octodec-2-enoyl-ACP[c0] => 1.000000 NAD[c0] + 1.000000 Octodecanoyl-ACP[c0]	1.000000 M_cpd00067_c0 + 1.000000 M_cpd00004_c0 + 1.000000 M_cpd11572_c0 => 1.000000 M_cpd00003_c0 + 1.000000 M_cpd11573_c0		0	0	0	0	0	0	0	0	0	0	0	0
R_rxn05465_c0	Malonyl-CoA:[acyl-carrier-protein] S-malonyltransferase	1.000000 H+[c0] + 1.000000 ACP[c0] + 1.000000 Malonyl-CoA[c0] <=> 1.000000 CoA[c0] + 1.000000 Malonyl-acyl-carrierprotein-[c0]	1.000000 M_cpd00067_c0 + 1.000000 M_cpd11493_c0 + 1.000000 M_cpd00070_c0 <=> 1.000000 M_cpd00010_c0 + 1.000000 M_cpd11492_c0		0.660022	1.47327	0.680489	0.730687	0.680489	0.730687	0.680489	23.9731	0.660022	21.2953	0.0908506	0.0975525
R_rxn05466_c0	TRANS-RXN-173.ce	1.000000 NH3[e0] <=> 1.000000 NH3[c0]	1.000000 M_cpd00013_e0 <=> 1.000000 M_cpd00013_c0		2.1e-09	0	2.1e-09	0	2.1e-09	0	2.1e-09	0	2.1e-09	0	0	0
R_rxn05467_c0	CO2 transporter via diffusion	1.000000 CO2[e0] <=> 1.000000 CO2[c0]	1.000000 M_cpd00011_e0 <=> 1.000000 M_cpd00011_c0		-4.48027	0	-4.48027	0	-4.48027	0	-4.48027	0	-8.96053	0	-0.598151	0
R_rxn05468_c0	TRANS-RXNAVI-26568.ce	1.000000 O2[e0] <=> 1.000000 O2[c0]	1.000000 M_cpd00007_e0 <=> 1.000000 M_cpd00007_c0		21.5138	21.5138	21.5138	21.5138	21.5138	21.5138	21.5138	37.0088	21.5138	34.7285	2.87226	2.87226
R_rxn05488_c0	0	1.0 Acetate[e0] + 1.0 H+[e0] <=> 1.0 Acetate[c0] + 1.0 H+[c0]	1.0 M_cpd00029_e0 + 1.0 M_cpd00067_e0 <=> 1.0 M_cpd00029_c0 + 1.0 M_cpd00067_c0		-4.48027	0	1.76e-08	0	1.76e-08	0	1.76e-08	0	-4.48027	0	-5.9e-09	0
R_rxn05496_c0	TRANS-RXNBWI-115637.ce.maizeexp.L-ALPHA-ALANINE_L-ALPHA-ALANINE	1.0 H+[e0] + 1.0 L-Alanine[e0] => 1.0 H+[c0] + 1.0 L-Alanine[c0]	1.0 M_cpd00067_e0 + 1.0 M_cpd00035_e0 => 1.0 M_cpd00067_c0 + 1.0 M_cpd00035_c0		0	0	0	0	0	0	0	0	0	0	0	0
R_rxn05506_c0	Arsenate transporter	1.000000 Arsenate[c0] => 1.000000 Arsenate[e0]	1.000000 M_cpd01048_c0 => 1.000000 M_cpd01048_e0		0	0	0	0	0	0	0	0	0	0	0	0
R_rxn05507_c0	arsenite transp or ter via unip or t	1.000000 Arsenite[c0] <=> 1.000000 Arsenite[e0]	1.000000 M_cpd04098_c0 <=> 1.000000 M_cpd04098_e0		0	0	0	0	0	0	0	0	0	0	0	0
R_rxn05508_c0	TRANS-RXNBWI-115637.ce.maizeexp.ASN_ASN	1.000000 H+[e0] + 1.000000 L-Asparagine[e0] => 1.000000 H+[c0] + 1.000000 L-Asparagine[c0]	1.000000 M_cpd00067_e0 + 1.000000 M_cpd00132_e0 => 1.000000 M_cpd00067_c0 + 1.000000 M_cpd00132_c0		0	0	0	0	0	0	0	0	0	0	0	0
R_rxn05516_c0	Cadmium-translocating P-type ATPase	1.000000 ATP[c0] + 1.000000 H2O[c0] + 1.000000 Cd2+[c0] => 1.000000 H+[c0] + 1.000000 ADP[c0] + 1.000000 Phosphate[c0] + 1.000000 Cd2+[e0]	1.000000 M_cpd00002_c0 + 1.000000 M_cpd00001_c0 + 1.000000 M_cpd01012_c0 => 1.000000 M_cpd00067_c0 + 1.000000 M_cpd00008_c0 + 1.000000 M_cpd00009_c0 + 1.000000 M_cpd01012_e0		0	0	0	0	0	0	0	0	0	0	0	0
R_rxn05520_c0	citrate transport in via Mn complex	1.000000 H+[e0] + 1.000000 Citrate[e0] + 1.000000 Mn2+[e0] => 1.000000 H+[c0] + 1.000000 Citrate[c0] + 1.000000 Mn2+[c0]	1.000000 M_cpd00067_e0 + 1.000000 M_cpd00137_e0 + 1.000000 M_cpd00030_e0 => 1.000000 M_cpd00067_c0 + 1.000000 M_cpd00137_c0 + 1.000000 M_cpd00030_c0		0	0	0	0	0	0	0	0	0	0	0	0
R_rxn05528_c0	Copper-transporting ATPase	1.000000 H+[c0] + 1.000000 ADP[c0] + 1.000000 Phosphate[c0] + 1.000000 Cu2+[e0] => 1.000000 ATP[c0] + 1.000000 H2O[c0] + 1.000000 Cu2+[c0]	1.000000 M_cpd00067_c0 + 1.000000 M_cpd00008_c0 + 1.000000 M_cpd00009_c0 + 1.000000 M_cpd00058_e0 => 1.000000 M_cpd00002_c0 + 1.000000 M_cpd00001_c0 + 1.000000 M_cpd00058_c0		0	0.0027888	0	0.0027888	0	0.0027888	0	0.0027888	0	0.0027888	0	0.000372327
R_rxn05533_c0	oligopeptide-transporting ATPase	1.000000 ATP[c0] + 1.000000 H2O[c0] + 1.000000 ala-L-asp-L[e0] => 1.000000 H+[c0] + 1.000000 ADP[c0] + 1.000000 Phosphate[c0] + 1.000000 ala-L-asp-L[c0]	1.000000 M_cpd00002_c0 + 1.000000 M_cpd00001_c0 + 1.000000 M_cpd11593_e0 => 1.000000 M_cpd00067_c0 + 1.000000 M_cpd00008_c0 + 1.000000 M_cpd00009_c0 + 1.000000 M_cpd11593_c0		0	0	0	0	0	0	0	0	0	0	0	0
R_rxn05534_c0	Dipeptide transport via ABC system (gly-glu)	1.000000 ATP[c0] + 1.000000 H2O[c0] + 1.000000 gly-glu-L[e0] => 1.000000 H+[c0] + 1.000000 ADP[c0] + 1.000000 Phosphate[c0] + 1.000000 gly-glu-L[c0]	1.000000 M_cpd00002_c0 + 1.000000 M_cpd00001_c0 + 1.000000 M_cpd11592_e0 => 1.000000 M_cpd00067_c0 + 1.000000 M_cpd00008_c0 + 1.000000 M_cpd00009_c0 + 1.000000 M_cpd11592_c0		0	0	0	0	0	0	0	0	0	0	0	0
R_rxn05535_c0	oligopeptide-transporting ATPase	1.000000 ATP[c0] + 1.000000 H2O[c0] + 1.000000 Gly-Met[e0] => 1.000000 H+[c0] + 1.000000 ADP[c0] + 1.000000 Phosphate[c0] + 1.000000 Gly-Met[c0]	1.000000 M_cpd00002_c0 + 1.000000 M_cpd00001_c0 + 1.000000 M_cpd11591_e0 => 1.000000 M_cpd00067_c0 + 1.000000 M_cpd00008_c0 + 1.000000 M_cpd00009_c0 + 1.000000 M_cpd11591_c0		0	0	0	0	0	0	0	0	0	0	0	0
R_rxn05536_c0	Dipeptide transport via ABC system (met-ala)	1.000000 ATP[c0] + 1.000000 H2O[c0] + 1.000000 met-L-ala-L[e0] => 1.000000 H+[c0] + 1.000000 ADP[c0] + 1.000000 Phosphate[c0] + 1.000000 met-L-ala-L[c0]	1.000000 M_cpd00002_c0 + 1.000000 M_cpd00001_c0 + 1.000000 M_cpd11590_e0 => 1.000000 M_cpd00067_c0 + 1.000000 M_cpd00008_c0 + 1.000000 M_cpd00009_c0 + 1.000000 M_cpd11590_c0		0	0	0	0	0	0	0	0	0	0	0	0
R_rxn05537_c0	oligopeptide-transporting ATPase	1.000000 ATP[c0] + 1.000000 H2O[c0] + 1.000000 gly-asp-L[e0] => 1.000000 H+[c0] + 1.000000 ADP[c0] + 1.000000 Phosphate[c0] + 1.000000 gly-asp-L[c0]	1.000000 M_cpd00002_c0 + 1.000000 M_cpd00001_c0 + 1.000000 M_cpd11589_e0 => 1.000000 M_cpd00067_c0 + 1.000000 M_cpd00008_c0 + 1.000000 M_cpd00009_c0 + 1.000000 M_cpd11589_c0		0	0	0	0	0	0	0	0	0	0	0	0
R_rxn05538_c0	Dipeptide transport via ABC system (gly-pro-L)	1.000000 ATP[c0] + 1.000000 H2O[c0] + 1.000000 gly-pro-L[e0] => 1.000000 H+[c0] + 1.000000 ADP[c0] + 1.000000 Phosphate[c0] + 1.000000 gly-pro-L[c0]	1.000000 M_cpd00002_c0 + 1.000000 M_cpd00001_c0 + 1.000000 M_cpd11588_e0 => 1.000000 M_cpd00067_c0 + 1.000000 M_cpd00008_c0 + 1.000000 M_cpd00009_c0 + 1.000000 M_cpd11588_c0		0	0	0	0	0	0	0	0	0	0	0	0
R_rxn05539_c0	oligopeptide-transporting ATPase	1.000000 ATP[c0] + 1.000000 H2O[c0] + 1.000000 Cys-Gly[e0] => 1.000000 H+[c0] + 1.000000 ADP[c0] + 1.000000 Phosphate[c0] + 1.000000 Cys-Gly[c0]	1.000000 M_cpd00002_c0 + 1.000000 M_cpd00001_c0 + 1.000000 M_cpd01017_e0 => 1.000000 M_cpd00067_c0 + 1.000000 M_cpd00008_c0 + 1.000000 M_cpd00009_c0 + 1.000000 M_cpd01017_c0		0	0	0	0	0	0	0	0	0	0	0	0
R_rxn05540_c0	oligopeptide-transporting ATPase	1.000000 ATP[c0] + 1.000000 H2O[c0] + 1.000000 Ala-Gln[e0] => 1.000000 H+[c0] + 1.000000 ADP[c0] + 1.000000 Phosphate[c0] + 1.000000 Ala-Gln[c0]	1.000000 M_cpd00002_c0 + 1.000000 M_cpd00001_c0 + 1.000000 M_cpd11587_e0 => 1.000000 M_cpd00067_c0 + 1.000000 M_cpd00008_c0 + 1.000000 M_cpd00009_c0 + 1.000000 M_cpd11587_c0		0	0	0	0	0	0	0	0	0	0	0	0
R_rxn05541_c0	Dipeptide transport via ABC system (ala-glu)	1.000000 ATP[c0] + 1.000000 H2O[c0] + 1.000000 ala-L-glu-L[e0] => 1.000000 H+[c0] + 1.000000 ADP[c0] + 1.000000 Phosphate[c0] + 1.000000 ala-L-glu-L[c0]	1.000000 M_cpd00002_c0 + 1.000000 M_cpd00001_c0 + 1.000000 M_cpd11586_e0 => 1.000000 M_cpd00067_c0 + 1.000000 M_cpd00008_c0 + 1.000000 M_cpd00009_c0 + 1.000000 M_cpd11586_c0		0	0	0	0	0	0	0	0	0	0	0	0
R_rxn05542_c0	oligopeptide-transporting ATPase	1.000000 ATP[c0] + 1.000000 H2O[c0] + 1.000000 L-alanylglycine[e0] => 1.000000 H+[c0] + 1.000000 ADP[c0] + 1.000000 Phosphate[c0] + 1.000000 L-alanylglycine[c0]	1.000000 M_cpd00002_c0 + 1.000000 M_cpd00001_c0 + 1.000000 M_cpd11585_e0 => 1.000000 M_cpd00067_c0 + 1.000000 M_cpd00008_c0 + 1.000000 M_cpd00009_c0 + 1.000000 M_cpd11585_c0		0	0	0	0	0	0	0	0	0	0	0	0
R_rxn05543_c0	oligopeptide-transporting ATPase	1.000000 ATP[c0] + 1.000000 H2O[c0] + 1.000000 Ala-His[e0] => 1.000000 H+[c0] + 1.000000 ADP[c0] + 1.000000 Phosphate[c0] + 1.000000 Ala-His[c0]	1.000000 M_cpd00002_c0 + 1.000000 M_cpd00001_c0 + 1.000000 M_cpd11584_e0 => 1.000000 M_cpd00067_c0 + 1.000000 M_cpd00008_c0 + 1.000000 M_cpd00009_c0 + 1.000000 M_cpd11584_c0		0	0	0	0	0	0	0	0	0	0	0	0
R_rxn05544_c0	oligopeptide-transporting ATPase	1.000000 ATP[c0] + 1.000000 H2O[c0] + 1.000000 Ala-Leu[e0] => 1.000000 H+[c0] + 1.000000 ADP[c0] + 1.000000 Phosphate[c0] + 1.000000 Ala-Leu[c0]	1.000000 M_cpd00002_c0 + 1.000000 M_cpd00001_c0 + 1.000000 M_cpd11583_e0 => 1.000000 M_cpd00067_c0 + 1.000000 M_cpd00008_c0 + 1.000000 M_cpd00009_c0 + 1.000000 M_cpd11583_c0		0	0	0	0	0	0	0	0	0	0	0	0
R_rxn05545_c0	Dipeptide transport via ABC system (ala-thr)	1.000000 ATP[c0] + 1.000000 H2O[c0] + 1.000000 ala-L-Thr-L[e0] => 1.000000 H+[c0] + 1.000000 ADP[c0] + 1.000000 Phosphate[c0] + 1.000000 ala-L-Thr-L[c0]	1.000000 M_cpd00002_c0 + 1.000000 M_cpd00001_c0 + 1.000000 M_cpd11582_e0 => 1.000000 M_cpd00067_c0 + 1.000000 M_cpd00008_c0 + 1.000000 M_cpd00009_c0 + 1.000000 M_cpd11582_c0		0	0	0	0	0	0	0	0	0	0	0	0
R_rxn05546_c0	Dipeptide transport via ABC system (gly-asn)	1.000000 ATP[c0] + 1.000000 H2O[c0] + 1.000000 gly-asn-L[e0] => 1.000000 H+[c0] + 1.000000 ADP[c0] + 1.000000 Phosphate[c0] + 1.000000 gly-asn-L[c0]	1.000000 M_cpd00002_c0 + 1.000000 M_cpd00001_c0 + 1.000000 M_cpd11581_e0 => 1.000000 M_cpd00067_c0 + 1.000000 M_cpd00008_c0 + 1.000000 M_cpd00009_c0 + 1.000000 M_cpd11581_c0		0	0	0	0	0	0	0	0	0	0	0	0
R_rxn05547_c0	oligopeptide-transporting ATPase	1.000000 ATP[c0] + 1.000000 H2O[c0] + 1.000000 Gly-Gln[e0] => 1.000000 H+[c0] + 1.000000 ADP[c0] + 1.000000 Phosphate[c0] + 1.000000 Gly-Gln[c0]	1.000000 M_cpd00002_c0 + 1.000000 M_cpd00001_c0 + 1.000000 M_cpd11580_e0 => 1.000000 M_cpd00067_c0 + 1.000000 M_cpd00008_c0 + 1.000000 M_cpd00009_c0 + 1.000000 M_cpd11580_c0		0	0	0	0	0	0	0	0	0	0	0	0
R_rxn05555_c0	iron (II) transport via ABC system	1.000000 ATP[c0] + 1.000000 H2O[c0] + 1.000000 Fe+2[e0] => 1.000000 H+[c0] + 1.000000 ADP[c0] + 1.000000 Phosphate[c0] + 1.000000 Fe+2[c0]	1.000000 M_cpd00002_c0 + 1.000000 M_cpd00001_c0 + 1.000000 M_cpd10515_e0 => 1.000000 M_cpd00067_c0 + 1.000000 M_cpd00008_c0 + 1.000000 M_cpd00009_c0 + 1.000000 M_cpd10515_c0		1e-10	-9.08e-08	1e-10	-9.08e-08	1e-10	-9.08e-08	0	0.00344539	1e-10	0.00344539	2e-10	3.19e-08
R_rxn05557_c0	iron (III) dicitrate transport via ABC system	1.000000 ATP[c0] + 1.000000 H2O[c0] + 1.000000 Fe+3[e0] + 2.000000 Citrate[e0] => 1.000000 H+[c0] + 1.000000 ADP[c0] + 1.000000 Phosphate[c0] + 2.000000 Citrate[c0] + 1.000000 Fe+3[c0]	1.000000 M_cpd00002_c0 + 1.000000 M_cpd00001_c0 + 1.000000 M_cpd10516_e0 + 2.000000 M_cpd00137_e0 => 1.000000 M_cpd00067_c0 + 1.000000 M_cpd00008_c0 + 1.000000 M_cpd00009_c0 + 2.000000 M_cpd00137_c0 + 1.000000 M_cpd10516_c0		0	0	0	0	0	0	0	0	0	0	0	0
R_rxn05559_c0	0	1.0 Formate[e0] + 1.0 H+[e0] <=> 1.0 Formate[c0] + 1.0 H+[c0]	1.0 M_cpd00047_e0 + 1.0 M_cpd00067_e0 <=> 1.0 M_cpd00047_c0 + 1.0 M_cpd00067_c0		-4.48027	0	-4.48027	0	-4.48027	0	-4.48027	0	-8.96053	0	-0.598151	0
R_rxn05602_c0	0	1.0 L-Lactate[e0] + 1.0 H+[e0] <=> 1.0 L-Lactate[c0] + 1.0 H+[c0]	1.0 M_cpd00159_e0 + 1.0 M_cpd00067_e0 <=> 1.0 M_cpd00159_c0 + 1.0 M_cpd00067_c0		1.14e-08	0	8.8e-09	0	8.8e-09	0	8.8e-09	0	-2.24013	0	-2.9e-09	0
R_rxn05616_c0	TRANS-RXN-141.ce	1.000000 Mg[c0] <=> 1.000000 Mg[e0]	1.000000 M_cpd00254_c0 <=> 1.000000 M_cpd00254_e0		-0.0195216	-0.0195216	-0.0195216	-0.0195216	-0.0195216	-0.0195216	-0.0195216	-0.0195216	-0.0195216	-0.0195216	-0.00260629	-0.00260629
R_rxn05625_c0	nitrite transport in via proton symport, reversible	1.000000 H+[e0] + 1.000000 Nitrite[e0] <=> 1.000000 H+[c0] + 1.000000 Nitrite[c0]	1.000000 M_cpd00067_e0 + 1.000000 M_cpd00075_e0 <=> 1.000000 M_cpd00067_c0 + 1.000000 M_cpd00075_c0		0	0	0	0	0	0	0	0	0	0	0	0
R_rxn05627_c0	nitrate transport in via proton symport	1.000000 H+[e0] + 1.000000 Nitrate[e0] <=> 1.000000 H+[c0] + 1.000000 Nitrate[c0]	1.000000 M_cpd00067_e0 + 1.000000 M_cpd00209_e0 <=> 1.000000 M_cpd00067_c0 + 1.000000 M_cpd00209_c0		0	0	0	0	0	0	0	0	0	0	0	0
R_rxn05645_c0	riboflavin transport in via proton symport	1.000000 H+[e0] + 1.000000 Riboflavin[e0] => 1.000000 H+[c0] + 1.000000 Riboflavin[c0]	1.000000 M_cpd00067_e0 + 1.000000 M_cpd00220_e0 => 1.000000 M_cpd00067_c0 + 1.000000 M_cpd00220_c0		0	0	0	0	0	0	0	0	0	0	0	0
R_rxn05651_c0	sulfate transport in via proton symport	1.000000 H+[e0] + 1.000000 Sulfate[e0] <=> 1.000000 H+[c0] + 1.000000 Sulfate[c0]	1.000000 M_cpd00067_e0 + 1.000000 M_cpd00048_e0 <=> 1.000000 M_cpd00067_c0 + 1.000000 M_cpd00048_c0		-37.2755	0.051532	-22.1496	0.051532	-23.6431	0.051532	-351.432	0.051532	-320.359	0.051532	-27.9121	0.00687992
R_rxn05663_c0	TRANS-RXNBWI-115637.ce.maizeexp.TRP_TRP	1.000000 H+[e0] + 1.000000 L-Tryptophan[e0] => 1.000000 H+[c0] + 1.000000 L-Tryptophan[c0]	1.000000 M_cpd00067_e0 + 1.000000 M_cpd00065_e0 => 1.000000 M_cpd00067_c0 + 1.000000 M_cpd00065_c0		0	0	0	0	0	0	0	0	0	0	0	0
R_rxn05669_c0	TRANS-RXNBWI-115637.ce.maizeexp.VAL_VAL	1.0 H+[e0] + 1.0 L-Valine[e0] => 1.0 H+[c0] + 1.0 L-Valine[c0]	1.0 M_cpd00067_e0 + 1.0 M_cpd00156_e0 => 1.0 M_cpd00067_c0 + 1.0 M_cpd00156_c0		0	0	0	0	0	0	0	0	0	0	0	0
R_rxn05704_c0	0	1.0 Methanamine[e0] + 1.0 H+[e0] <=> 1.0 Methanamine[c0] + 1.0 H+[c0]	1.0 M_cpd00187_e0 + 1.0 M_cpd00067_e0 <=> 1.0 M_cpd00187_c0 + 1.0 M_cpd00067_c0		0	0	0	0	0	0	0	0	0	0	0	0
R_rxn05733_c0	O3-acetyl-L-serine:thiosulfate 2-amino-2-carboxyethyltransferase (reducing, L-cysteine-forming)	1.000000 O-Acetyl-L-serine[c0] + 1.000000 H2S2O3[c0] + 1.000000 trdrd[c0] => 1.000000 H+[c0] + 1.000000 L-Cysteine[c0] + 1.000000 Acetate[c0] + 1.000000 Sulfite[c0] + 1.000000 trdox[c0]	1.000000 M_cpd00722_c0 + 1.000000 M_cpd00268_c0 + 1.000000 M_cpd11421_c0 => 1.000000 M_cpd00067_c0 + 1.000000 M_cpd00084_c0 + 1.000000 M_cpd00029_c0 + 1.000000 M_cpd00081_c0 + 1.000000 M_cpd11420_c0		0	21.4453	0	14.8612	0	15.4212	0	138.342	0	126.778	0	11.3422
R_rxn05734_c0	aldehyde dehydrogenase (glyoxylate, NAD)	1.000000 H2O[c0] + 1.000000 NAD[c0] + 1.000000 Glyoxalate[c0] <=> 2.000000 H+[c0] + 1.000000 NADH[c0] + 1.000000 Oxalate[c0]	1.000000 M_cpd00001_c0 + 1.000000 M_cpd00003_c0 + 1.000000 M_cpd00040_c0 <=> 2.000000 M_cpd00067_c0 + 1.000000 M_cpd00004_c0 + 1.000000 M_cpd00180_c0		0	0	0	0	0	0	0	0	0	0	0	0
R_rxn05735_c0	aldehyde dehydrogenase (aminoacetaldehyde, NAD)	1.000000 H2O[c0] + 1.000000 NAD[c0] + 1.000000 Aminoacetaldehyde[c0] => 2.000000 H+[c0] + 1.000000 Glycine[c0] + 1.000000 NADH[c0]	1.000000 M_cpd00001_c0 + 1.000000 M_cpd00003_c0 + 1.000000 M_cpd04122_c0 => 2.000000 M_cpd00067_c0 + 1.000000 M_cpd00033_c0 + 1.000000 M_cpd00004_c0		0	0	0	0	0	0	0	0	0	0	0	0
R_rxn05736_c0	acyl-coenzyme A ligase	1.000000 ATP[c0] + 1.000000 CoA[c0] + 1.000000 Myristic acid[c0] => 1.000000 PPi[c0] + 1.000000 H+[c0] + 1.000000 AMP[c0] + 1.000000 Myristoyl-CoA[c0]	1.000000 M_cpd00002_c0 + 1.000000 M_cpd00010_c0 + 1.000000 M_cpd03847_c0 => 1.000000 M_cpd00012_c0 + 1.000000 M_cpd00067_c0 + 1.000000 M_cpd00018_c0 + 1.000000 M_cpd01695_c0		0	13.9976	0	8.32544	0	8.88547	0	131.806	0	124.27	0	10.4696
R_rxn05737_c0	RXN0-6973.c	1.000000 O2[c0] + 1.000000 Taurine[c0] + 1.000000 FMNH2[c0] => 1.000000 H+[c0] + 1.000000 H2O[c0] + 1.000000 Sulfite[c0] + 1.000000 FMN[c0] + 1.000000 Aminoacetaldehyde[c0]	1.000000 M_cpd00007_c0 + 1.000000 M_cpd00210_c0 + 1.000000 M_cpd01270_c0 => 1.000000 M_cpd00067_c0 + 1.000000 M_cpd00001_c0 + 1.000000 M_cpd00081_c0 + 1.000000 M_cpd00050_c0 + 1.000000 M_cpd04122_c0		0	0	0	0	0	0	0	0	0	0	0	0
R_rxn05744_c0	b-ketoacyl synthetase (n-C14:0)	17.000000 H+[c0] + 1.000000 Acetyl-CoA[c0] + 6.000000 Malonyl-CoA[c0] + 12.000000 NADPH[c0] => 5.000000 H2O[c0] + 7.000000 CoA[c0] + 6.000000 CO2[c0] + 12.000000 NADP[c0] + 1.000000 Myristic acid[c0]	17.000000 M_cpd00067_c0 + 1.000000 M_cpd00022_c0 + 6.000000 M_cpd00070_c0 + 12.000000 M_cpd00005_c0 => 5.000000 M_cpd00001_c0 + 7.000000 M_cpd00010_c0 + 6.000000 M_cpd00011_c0 + 12.000000 M_cpd00006_c0 + 1.000000 M_cpd03847_c0		0	0.11445	0	0.0083664	0	0.0083664	0	3.8821	0	3.41812	0	0.00111698
R_rxn05814_c0	ATP:nucleoside-phosphate phosphotransferase	1.000000 ATP[c0] + 1.000000 Nucleoside phosphate[c0] <=> 1.000000 ADP[c0] + 1.000000 NDP[c0]	1.000000 M_cpd00002_c0 + 1.000000 M_cpd12232_c0 <=> 1.000000 M_cpd00008_c0 + 1.000000 M_cpd00354_c0		0	0	0	0	0	0	0	0	0	0	0	0
R_rxn05871_c0	primary_alcohol:NAD+ oxidoreductase	1.000000 NAD[c0] + 1.000000 1-Alcohol[c0] <=> 1.000000 H+[c0] + 1.000000 NADH[c0] + 1.000000 RCHO[c0]	1.000000 M_cpd00003_c0 + 1.000000 M_cpd00195_c0 <=> 1.000000 M_cpd00067_c0 + 1.000000 M_cpd00004_c0 + 1.000000 M_cpd11616_c0		0	0	0	0	0	0	0	0	0	0	0	0
R_rxn05872_c0	Secondary_alcohol:NAD+ oxidoreductase	1.000000 NAD[c0] + 1.000000 Secondary alcohol[c0] <=> 1.000000 H+[c0] + 1.000000 NADH[c0] + 1.000000 Ketone[c0]	1.000000 M_cpd00003_c0 + 1.000000 M_cpd11679_c0 <=> 1.000000 M_cpd00067_c0 + 1.000000 M_cpd00004_c0 + 1.000000 M_cpd11733_c0		0	0	0	0	0	0	0	0	0	0	0	0
R_rxn05890_c0	nitric-oxide:oxidized azurin oxidoreductase	1.000000 H2O[c0] + 1.000000 NO[c0] + 1.000000 Oxidized azurin[c0] <=> 2.000000 H+[c0] + 1.000000 Nitrite[c0] + 1.000000 Reduced azurin[c0]	1.000000 M_cpd00001_c0 + 1.000000 M_cpd00418_c0 + 1.000000 M_cpd12711_c0 <=> 2.000000 M_cpd00067_c0 + 1.000000 M_cpd00075_c0 + 1.000000 M_cpd12712_c0		0	0	0	0	0	0	0	0	0	0	0	0
R_rxn05919_c0	Acyl-CoA:glycerone-phosphate O-acyltransferase	1.000000 Glycerone-phosphate[c0] + 1.000000 Acyl-CoA[c0] <=> 1.000000 CoA[c0] + 1.000000 Acylglycerone phosphate[c0]	1.000000 M_cpd00095_c0 + 1.000000 M_cpd11611_c0 <=> 1.000000 M_cpd00010_c0 + 1.000000 M_cpd12300_c0		0	0	0	0	0	0	0	0	0	0	0	0
R_rxn05938_c0	pyruvate ferredoxin oxidoreductase	1.000000 H+[c0] + 1.000000 Acetyl-CoA[c0] + 1.000000 CO2[c0] + 1.000000 Reducedferredoxin[c0] <=> 1.000000 CoA[c0] + 1.000000 Pyruvate[c0] + 1.000000 Oxidizedferredoxin[c0]	1.000000 M_cpd00067_c0 + 1.000000 M_cpd00022_c0 + 1.000000 M_cpd00011_c0 + 1.000000 M_cpd11620_c0 <=> 1.000000 M_cpd00010_c0 + 1.000000 M_cpd00020_c0 + 1.000000 M_cpd11621_c0		-8.35994	-8.35994	-8.35994	-8.35994	-8.35994	-8.35994	-8.35994	-8.35994	-8.35994	-8.35994	-1.11612	-1.11612
R_rxn05957_c0	O4-succinyl-L-homoserine:hydrogen sulfide S-(3-amino-3-carboxypropyl)transferase	1.000000 H2S[c0] + 1.000000 O-Succinyl-L-homoserine[c0] => 1.000000 Succinate[c0] + 1.000000 Homocysteine[c0]	1.000000 M_cpd00239_c0 + 1.000000 M_cpd00822_c0 => 1.000000 M_cpd00036_c0 + 1.000000 M_cpd00135_c0		0	14.9096	0	8.32544	0	8.88547	0	131.806	0	122.802	0	10.4696
R_rxn06023_c0	CoA:apo-[acyl-carrier-protein] pantetheinephosphotransferase	1.000000 CoA[c0] + 1.000000 apo-ACP[c0] => 1.000000 ACP[c0] + 1.000000 Adenosine 3-5-bisphosphate[c0]	1.000000 M_cpd00010_c0 + 1.000000 M_cpd12370_c0 => 1.000000 M_cpd11493_c0 + 1.000000 M_cpd00045_c0		0.0009	0.0009	0.0009	0.0009	0.0009	0.0009	0.0009	0.0009	0.0009	0.0009	0.000120157	0.000120157
R_rxn06060_c0	Thiosulfate:thiol sulfurtransferase	2.000000 GSH[c0] + 1.000000 H2S2O3[c0] <=> 1.000000 H+[c0] + 1.000000 Sulfite[c0] + 1.000000 H2S[c0] + 1.000000 Oxidized glutathione[c0]	2.000000 M_cpd00042_c0 + 1.000000 M_cpd00268_c0 <=> 1.000000 M_cpd00067_c0 + 1.000000 M_cpd00081_c0 + 1.000000 M_cpd00239_c0 + 1.000000 M_cpd00111_c0		-0.0144257	21.4309	-0.0144257	14.8468	-0.0144257	15.4068	-0.0144257	138.328	-0.0144257	126.763	-0.00192594	11.3403
R_rxn06075_c0	2'-Deoxyuridine 5'-diphosphate:oxidized-thioredoxin 2'-oxidoreductase	1.000000 UDP[c0] + 1.000000 trdrd[c0] => 1.000000 H2O[c0] + 1.000000 trdox[c0] + 1.000000 dUDP[c0]	1.000000 M_cpd00014_c0 + 1.000000 M_cpd11421_c0 => 1.000000 M_cpd00001_c0 + 1.000000 M_cpd11420_c0 + 1.000000 M_cpd00978_c0		0	0.00528871	0	0.00528871	0	0.00528871	0	0.00528871	0	0.00528871	0	0.000706082
R_rxn06077_c0	L-methionine:oxidized-thioredoxin S-oxidoreductase	1.000000 H2O[c0] + 1.000000 L-Methionine[c0] + 1.000000 trdox[c0] <=> 1.000000 trdrd[c0] + 1.000000 L-Methionine S-oxide[c0]	1.000000 M_cpd00001_c0 + 1.000000 M_cpd00060_c0 + 1.000000 M_cpd11420_c0 <=> 1.000000 M_cpd11421_c0 + 1.000000 M_cpd01914_c0		0	0	0	0	0	0	0	0	0	0	0	0
R_rxn06098_c0	Phosphatidylcholine:sterol O-acyltransferase	1.000000 Lecithin[c0] + 1.000000 Sterol[c0] <=> 1.000000 2-Lysolecithin[c0] + 1.000000 Steryl ester[c0]	1.000000 M_cpd11624_c0 + 1.000000 M_cpd00301_c0 <=> 1.000000 M_cpd02601_c0 + 1.000000 M_cpd11979_c0		0	0	0	0	0	0	0	0	0	0	0	0
R_rxn06099_c0	Steryl-ester acylhydrolase	1.000000 H2O[c0] + 1.000000 Steryl ester[c0] <=> 1.000000 H+[c0] + 1.000000 Carboxylic acid[c0] + 1.000000 Sterol[c0]	1.000000 M_cpd00001_c0 + 1.000000 M_cpd11979_c0 <=> 1.000000 M_cpd00067_c0 + 1.000000 M_cpd00049_c0 + 1.000000 M_cpd00301_c0		0	0	0	0	0	0	0	0	0	0	0	0
R_rxn06181_c0	ATP:[protein]-L-tyrosine O-phosphotransferase	1.000000 ATP[c0] + 1.000000 Protein tyrosine[c0] <=> 1.000000 ADP[c0] + 1.000000 Protein tyrosine phosphate[c0]	1.000000 M_cpd00002_c0 + 1.000000 M_cpd11704_c0 <=> 1.000000 M_cpd00008_c0 + 1.000000 M_cpd11820_c0		0	0	0	0	0	0	0	0	0	0	0	0
R_rxn06194_c0	Protein glutamine amidohydrolase	1.000000 H2O[c0] + 1.000000 Protein glutamine[c0] <=> 1.000000 NH3[c0] + 1.000000 Protein glutamate[c0]	1.000000 M_cpd00001_c0 + 1.000000 M_cpd12140_c0 <=> 1.000000 M_cpd00013_c0 + 1.000000 M_cpd11711_c0		0	0	0	0	0	0	0	0	0	0	0	0
R_rxn06197_c0	ATP:protein-L-histidine N(pi)-phosphotransferase	1.000000 ATP[c0] + 1.000000 Protein histidine[c0] <=> 1.000000 H+[c0] + 1.000000 ADP[c0] + 1.000000 Protein N-pros-phosphohistidine[c0]	1.000000 M_cpd00002_c0 + 1.000000 M_cpd11712_c0 <=> 1.000000 M_cpd00067_c0 + 1.000000 M_cpd00008_c0 + 1.000000 M_cpd12508_c0		0	0	0	0	0	0	0	0	0	0	0	0
R_rxn06377_c0	glycine:lipoylprotein oxidoreductase (decarboxylating and acceptor-aminomethylating)	1.000000 H+[c0] + 1.000000 Glycine[c0] + 1.000000 Lipoylprotein[c0] => 1.000000 CO2[c0] + 1.000000 S-Aminomethyldihydrolipoylprotein[c0]	1.000000 M_cpd00067_c0 + 1.000000 M_cpd00033_c0 + 1.000000 M_cpd12005_c0 => 1.000000 M_cpd00011_c0 + 1.000000 M_cpd11830_c0		0	0	0	0	0	0	0	0	0	0	0	0
R_rxn06394_c0	R03491	1.000000 Neu5Ac[c0] + 1.000000 LacCer[c0] <=> 1.000000 H2O[c0] + 1.000000 GM3[c0]	1.000000 M_cpd00232_c0 + 1.000000 M_cpd00947_c0 <=> 1.000000 M_cpd00001_c0 + 1.000000 M_cpd12599_c0		0	0	0	0	0	0	0	0	0	0	0	0
R_rxn06488_c0	Deoxylimonate A-ring-lactonohydrolase	1.000000 H2O[c0] + 1.000000 Deoxylimonate[c0] <=> 1.000000 H+[c0] + 1.000000 Deoxylimononic acid D-ring-lactone[c0]	1.000000 M_cpd00001_c0 + 1.000000 M_cpd11999_c0 <=> 1.000000 M_cpd00067_c0 + 1.000000 M_cpd12503_c0		0	0	0	0	0	0	0	0	0	0	0	0
R_rxn06515_c0	R03875	1.000000 S-Adenosyl-L-methionine[c0] + 1.000000 Protein lysine[c0] <=> 1.000000 H+[c0] + 1.000000 S-Adenosyl-homocysteine[c0] + 1.000000 Protein N6-methyl-L-lysine[c0]	1.000000 M_cpd00017_c0 + 1.000000 M_cpd12043_c0 <=> 1.000000 M_cpd00067_c0 + 1.000000 M_cpd00019_c0 + 1.000000 M_cpd12736_c0		0	0	0	0	0	0	0	0	0	0	0	0
R_rxn06526_c0	protein-dithiol:NADP+ oxidoreductase	1.000000 NADP[c0] + 1.000000 Protein dithiol[c0] <=> 1.000000 H+[c0] + 1.000000 NADPH[c0] + 1.000000 Protein disulfide[c0]	1.000000 M_cpd00006_c0 + 1.000000 M_cpd12072_c0 <=> 1.000000 M_cpd00067_c0 + 1.000000 M_cpd00005_c0 + 1.000000 M_cpd12139_c0		0	0	0	0	0	0	0	0	0	0	0	0
R_rxn06570_c0	S-Adenosyl-L-methionine:calmodulin-L-lysine N6-methyltransferase	1.000000 S-Adenosyl-L-methionine[c0] + 1.000000 Calmodulin L-lysine[c0] <=> 1.000000 H+[c0] + 1.000000 S-Adenosyl-homocysteine[c0] + 1.000000 Calmodulin N6-methyl-L-lysine[c0]	1.000000 M_cpd00017_c0 + 1.000000 M_cpd12190_c0 <=> 1.000000 M_cpd00067_c0 + 1.000000 M_cpd00019_c0 + 1.000000 M_cpd12431_c0		0	0	0	0	0	0	0	0	0	0	0	0
R_rxn06577_c0	NAD+:peptide-diphthamide N-(ADP-D-ribosyl)transferase	1.000000 NAD[c0] + 1.000000 Diphthamide[c0] <=> 1.000000 H+[c0] + 1.000000 Nicotinamide[c0] + 1.000000 EF-2 N-(ADP-D-ribosyl)diphthamide[c0]	1.000000 M_cpd00003_c0 + 1.000000 M_cpd11953_c0 <=> 1.000000 M_cpd00067_c0 + 1.000000 M_cpd00133_c0 + 1.000000 M_cpd12522_c0		0	0	0	0	0	0	0	0	0	0	0	0
R_rxn06591_c0	L-glutamate-semialdehyde: NADP+ oxidoreductase(L-glutamyl-tRNA(Glu)-forming)	1.000000 H+[c0] + 1.000000 NADPH[c0] + 1.000000 L-Glutamyl-tRNA-Glu[c0] => 1.000000 NADP[c0] + 1.000000 tRNA-Glu[c0] + 1.000000 L-Glutamate1-semialdehyde[c0]	1.000000 M_cpd00067_c0 + 1.000000 M_cpd00005_c0 + 1.000000 M_cpd12227_c0 => 1.000000 M_cpd00006_c0 + 1.000000 M_cpd11912_c0 + 1.000000 M_cpd02345_c0		0.0144	0.0144	0.0144	0.0144	0.0144	0.0144	0	0.0144	0	0.0144	0.0019225	0.00192251
R_rxn06600_c0	S-aminomethyldihydrolipoylprotein:(6S)-tetrahydrofolate aminomethyltransferase (ammonia-forming)	1.000000 Tetrahydrofolate[c0] + 1.000000 S-Aminomethyldihydrolipoylprotein[c0] => 1.000000 NH3[c0] + 1.000000 5-10-Methylenetetrahydrofolate[c0] + 1.000000 Dihydrolipolprotein[c0]	1.000000 M_cpd00087_c0 + 1.000000 M_cpd11830_c0 => 1.000000 M_cpd00013_c0 + 1.000000 M_cpd00125_c0 + 1.000000 M_cpd12225_c0		0	0	0	0	0	0	0	0	0	0	0	0
R_rxn06672_c0	biotin-carboxyl-carrier-protein:carbon-dioxide ligase (ADP-forming)	1.000000 ATP[c0] + 1.000000 H2CO3[c0] + 1.000000 Holo-[carboxylase][c0] <=> 1.000000 H+[c0] + 1.000000 ADP[c0] + 1.000000 Phosphate[c0] + 1.000000 Carboxybiotin-carboxyl-carrier protein[c0]	1.000000 M_cpd00002_c0 + 1.000000 M_cpd00242_c0 + 1.000000 M_cpd12848_c0 <=> 1.000000 M_cpd00067_c0 + 1.000000 M_cpd00008_c0 + 1.000000 M_cpd00009_c0 + 1.000000 M_cpd12543_c0		1.23829	29.2336	1.23829	17.8892	1.23829	19.0092	1.23829	264.851	1.23829	241.547	0.165321	21.1046
R_rxn06673_c0	Acetyl-CoA:carbon-dioxide ligase (ADP-forming)	1.000000 Acetyl-CoA[c0] + 1.000000 Carboxybiotin-carboxyl-carrier protein[c0] => 1.000000 Malonyl-CoA[c0] + 1.000000 Holo-[carboxylase][c0]	1.000000 M_cpd00022_c0 + 1.000000 M_cpd12543_c0 => 1.000000 M_cpd00070_c0 + 1.000000 M_cpd12848_c0		1.23829	29.2336	1.23829	17.8892	1.23829	19.0092	1.23829	264.851	1.23829	241.547	0.165321	21.1046
R_rxn06690_c0	UDPgalactose:D-galactosyl-1,4-beta-D-glucosyl-R beta-1,3-galactosyltransferase	1.000000 UDP-galactose[c0] + 1.000000 D-Galactosyl-1,4-beta-D-glucosyl-R[c0] <=> 1.000000 UDP[c0] + 1.000000 D-Galactosyl-1,3-beta-D-galactosyl-1,4-beta-D-glucosyl-R[c0]	1.000000 M_cpd00043_c0 + 1.000000 M_cpd12499_c0 <=> 1.000000 M_cpd00014_c0 + 1.000000 M_cpd02902_c0		0	0	0	0	0	0	0	0	0	0	0	0
R_rxn06723_c0	(3R)-3-hydroxymyristoyl-[acyl-carrier protein]:UDP-3-O-[(3R)-3-hydroxymyristoyl]-alpha-D-glucosamine N-acetyltransferase	1.000000 UDP-3-O-(beta-hydroxymyristoyl)-D-glucosamine[c0] + 1.000000 HMA[c0] => 1.000000 ACP[c0] + 1.000000 UDP-2,3-bis(3-hydroxytetradecanoyl)glucosamine[c0]	1.000000 M_cpd03584_c0 + 1.000000 M_cpd11484_c0 => 1.000000 M_cpd11493_c0 + 1.000000 M_cpd02835_c0		0.00111552	0.00111552	0.00111552	0.00111552	0.00111552	0.00111552	0.00111552	0.00111552	0.00111552	0.00111552	0.000148931	0.000148926
R_rxn06728_c0	CMP-N-acetylneuraminate:alpha-N-acetylneuraminyl-2,3-beta-D-galactoside alpha-2,8-N-acetylneuraminyltransferase	1.000000 CMP-N-acetylneuraminate[c0] + 1.000000 alpha-N-Acetylneuraminyl-2,3-beta-D-galactosyl-R[c0] <=> 1.000000 H+[c0] + 1.000000 CMP[c0] + 1.000000 alpha-N-Acetylneuraminyl-2,8-alpha-N-acetylneuraminyl-2,3-beta-D- galactosyl-R[c0]	1.000000 M_cpd00112_c0 + 1.000000 M_cpd12592_c0 <=> 1.000000 M_cpd00067_c0 + 1.000000 M_cpd00046_c0 + 1.000000 M_cpd02972_c0		0	0	0	0	0	0	0	0	0	0	0	0
R_rxn06729_c0	(R)-3-Hydroxytetradecanoly-[acyl-carrier-protein]:UDP-N-acetyl-glucosamine 3-O-(3-hydroxytetradecanoyl)transferase	1.000000 H+[c0] + 1.000000 UDP-N-acetylglucosamine[c0] + 1.000000 HMA[c0] => 1.000000 ACP[c0] + 1.000000 UDP-3-O-(beta-hydroxymyristoyl)-N-acetylglucosamine[c0]	1.000000 M_cpd00067_c0 + 1.000000 M_cpd00037_c0 + 1.000000 M_cpd11484_c0 => 1.000000 M_cpd11493_c0 + 1.000000 M_cpd02886_c0		0.00111552	0.00111552	0.00111552	0.00111552	0.00111552	0.00111552	0.00111552	0.00111552	0.00111552	0.00111552	0.000148931	0.000148926
R_rxn06735_c0	CMP-N-acetylneuraminate:alpha-N-acetylneuraminyl-2,3-beta-D-galactoside alpha-2,8-N-acetylneuraminyltransferase	1.000000 CMP-N-acetylneuraminate[c0] + 1.000000 GM3[c0] <=> 1.000000 H+[c0] + 1.000000 CMP[c0] + 1.000000 GD3[c0]	1.000000 M_cpd00112_c0 + 1.000000 M_cpd12599_c0 <=> 1.000000 M_cpd00067_c0 + 1.000000 M_cpd00046_c0 + 1.000000 M_cpd03654_c0		0	0	0	0	0	0	0	0	0	0	0	0
R_rxn06745_c0	L-alanyl-tRNA:UDP-N-acetylmuramoyl-L-alanyl-D-glutamyl-L-lysyl-D-alanyl-D-alanine N6-alanyltransferase	1 UDP-N-acetylmuramoyl-L-alanyl-D-glutamyl-L-lysyl-D-alanyl-D-alanine[c0] + 1 L-Alanyl-tRNA[c0] <=> 1 UDP-N-acetylmuramoyl-L-alanyl-D-glutamyl-N6-(L-alanyl)-L-lysyl-D- alanyl-D-alanine[c0] + 1 tRNA[c0]	1 M_cpd02943_c0 + 1 M_cpd11770_c0 <=> 1 M_cpd02977_c0 + 1 M_cpd11615_c0		0	0	0	0	0	0	0	0	0	0	0	0
R_rxn06750_c0	R04632	1.000000 CMP-N-acetylneuraminate[c0] + 1.000000 GM2[c0] <=> 1.000000 H+[c0] + 1.000000 CMP[c0] + 1.000000 GD2[c0]	1.000000 M_cpd00112_c0 + 1.000000 M_cpd02996_c0 <=> 1.000000 M_cpd00067_c0 + 1.000000 M_cpd00046_c0 + 1.000000 M_cpd03655_c0		0	0	0	0	0	0	0	0	0	0	0	0
R_rxn06752_c0	R04634	1.000000 H2O[c0] + 1.000000 GM2[c0] <=> 1.000000 Neu5Ac[c0] + 1.000000 GA2[c0]	1.000000 M_cpd00001_c0 + 1.000000 M_cpd02996_c0 <=> 1.000000 M_cpd00232_c0 + 1.000000 M_cpd03656_c0		0	0	0	0	0	0	0	0	0	0	0	0
R_rxn06759_c0	R04649	1.000000 CMP-N-acetylneuraminate[c0] + 1.000000 GM1[c0] <=> 1.000000 H+[c0] + 1.000000 CMP[c0] + 1.000000 GD1b[c0]	1.000000 M_cpd00112_c0 + 1.000000 M_cpd12640_c0 <=> 1.000000 M_cpd00067_c0 + 1.000000 M_cpd00046_c0 + 1.000000 M_cpd03661_c0		0	0	0	0	0	0	0	0	0	0	0	0
R_rxn06760_c0	R04650	1.000000 Neu5Ac[c0] + 1.000000 GM1[c0] <=> 1.000000 H2O[c0] + 1.000000 GD1a[c0]	1.000000 M_cpd00232_c0 + 1.000000 M_cpd12640_c0 <=> 1.000000 M_cpd00001_c0 + 1.000000 M_cpd02999_c0		0	0	0	0	0	0	0	0	0	0	0	0
R_rxn06804_c0	S-adenosyl-L-methionine:cytochrome-c-L-lysine N6-methyltransferase	1.000000 S-Adenosyl-L-methionine[c0] + 1.000000 Protein N6-methyl-L-lysine[c0] <=> 1.000000 H+[c0] + 1.000000 S-Adenosyl-homocysteine[c0] + 1.000000 Protein N6,N6-dimethyl-L-lysine[c0]	1.000000 M_cpd00017_c0 + 1.000000 M_cpd12736_c0 <=> 1.000000 M_cpd00067_c0 + 1.000000 M_cpd00019_c0 + 1.000000 M_cpd12737_c0		0	0	0	0	0	0	0	0	0	0	0	0
R_rxn06805_c0	S-adenosyl-L-methionine:cytochrome-c-L-lysine N6-methyltransferase	1.000000 S-Adenosyl-L-methionine[c0] + 1.000000 Protein N6,N6-dimethyl-L-lysine[c0] <=> 1.000000 S-Adenosyl-homocysteine[c0] + 1.000000 Protein N6,N6,N6-trimethyl-L-lysine[c0]	1.000000 M_cpd00017_c0 + 1.000000 M_cpd12737_c0 <=> 1.000000 M_cpd00019_c0 + 1.000000 M_cpd12738_c0		0	0	0	0	0	0	0	0	0	0	0	0
R_rxn06848_c0	R05075	1.000000 Myristoyl-ACP[c0] + 1.000000 Lauroyl-KDO2-lipid IV(A)[c0] => 1.000000 ACP[c0] + 1.000000 kdo2-lipid a[c0]	1.000000 M_cpd11466_c0 + 1.000000 M_cpd03736_c0 => 1.000000 M_cpd11493_c0 + 1.000000 M_cpd03587_c0		0.000557761	0.000557759	0.000557761	0.000557759	0.000557761	0.000557759	0.000557761	0.000557759	0.000557761	0.000557759	7.44654e-05	7.4463e-05
R_rxn06865_c0	R05146	1.000000 Dodecanoyl-ACP[c0] + 1.000000 kdo2-lipid iva[c0] => 1.000000 ACP[c0] + 1.000000 Lauroyl-KDO2-lipid IV(A)[c0]	1.000000 M_cpd11468_c0 + 1.000000 M_cpd03586_c0 => 1.000000 M_cpd11493_c0 + 1.000000 M_cpd03736_c0		0.000557761	0.000557759	0.000557761	0.000557759	0.000557761	0.000557759	0.000557761	0.000557759	0.000557761	0.000557759	7.44654e-05	7.4463e-05
R_rxn06870_c0	[Protein]-L-serine epimerase	1.000000 Protein serine[c0] <=> 1.000000 [Protein]-D-serine[c0]	1.000000 M_cpd12044_c0 <=> 1.000000 M_cpd12868_c0		0	0	0	0	0	0	0	0	0	0	0	0
R_rxn06874_c0	reduced ferredoxin:dinitrogen oxidoreductase (ATP-hydrolysing)	16.000000 ATP[c0] + 16.000000 H2O[c0] + 8.000000 Reducedferredoxin[c0] + 1.000000 N2[c0] <=> 6.000000 H+[c0] + 16.000000 ADP[c0] + 16.000000 Phosphate[c0] + 1.000000 H2[c0] + 2.000000 NH3[c0] + 8.000000 Oxidizedferredoxin[c0]	16.000000 M_cpd00002_c0 + 16.000000 M_cpd00001_c0 + 8.000000 M_cpd11620_c0 + 1.000000 M_cpd00528_c0 <=> 6.000000 M_cpd00067_c0 + 16.000000 M_cpd00008_c0 + 16.000000 M_cpd00009_c0 + 1.000000 M_cpd11640_c0 + 2.000000 M_cpd00013_c0 + 8.000000 M_cpd11621_c0		1.04499	1.04499	1.04499	1.04499	1.04499	1.04499	1.04499	1.04499	1.04499	1.04499	0.139515	0.139515
R_rxn06905_c0	R05363	1.000000 H2O[c0] + 1.000000 6-Oxo-2-hydroxy-7-(4'-chlorophenyl)-3,8,8-trichloroocta-2E,4E,7E- trienoate[c0] <=> 1.000000 H+[c0] + 1.000000 2-(4'-Chlorophenyl)-3,3-dichloropropenoate[c0] + 1.000000 2-Hydroxy-3-chloropenta-2,4-dienoate[c0]	1.000000 M_cpd00001_c0 + 1.000000 M_cpd04049_c0 <=> 1.000000 M_cpd00067_c0 + 1.000000 M_cpd04050_c0 + 1.000000 M_cpd08208_c0		0	0	0	0	0	0	0	0	0	0	0	0
R_rxn06937_c0	L-glutamate:tRNA(Glu) ligase (AMP-forming)	1.000000 ATP[c0] + 1.000000 L-Glutamate[c0] + 1.000000 tRNA-Glu[c0] => 1.000000 PPi[c0] + 1.000000 H+[c0] + 1.000000 AMP[c0] + 1.000000 L-Glutamyl-tRNA-Glu[c0]	1.000000 M_cpd00002_c0 + 1.000000 M_cpd00023_c0 + 1.000000 M_cpd11912_c0 => 1.000000 M_cpd00012_c0 + 1.000000 M_cpd00067_c0 + 1.000000 M_cpd00018_c0 + 1.000000 M_cpd12227_c0		0.0144	0.0144	0.0144	0.0144	0.0144	0.0144	0	0.0144	0	0.0144	0.0019225	0.00192251
R_rxn06998_c0	rxn06998	1 CoA[c0] => 1 Palmitoyl-CoA[c0]	1 M_cpd00010_c0 => 1 M_cpd00134_c0		0	0.106083	0.106083	0.106083	0.106083	0.106083	0.106083	0.106083	0	0.106083	0.014163	0.014163
R_rxn07056_c0	R06134	1.000000 H2O[c0] + 1.000000 Amide[c0] <=> 1.000000 Carboxylic acid[c0] + 1.000000 NH3[c0]	1.000000 M_cpd00001_c0 + 1.000000 M_cpd11636_c0 <=> 1.000000 M_cpd00049_c0 + 1.000000 M_cpd00013_c0		0	0	0	0	0	0	0	0	0	0	0	0
R_rxn07100_c0	CDPethanolamine:1-alkyl-2-acylglycerol ethanolaminephosphotransferase	1.000000 CDPethanolamine[c0] + 1.000000 1-Alkyl-2-acylglycerol[c0] <=> 2.000000 H+[c0] + 1.000000 CMP[c0] + 1.000000 1-Alkyl-2-acylglycerophosphoethanolamine[c0]	1.000000 M_cpd00444_c0 + 1.000000 M_cpd12273_c0 <=> 2.000000 M_cpd00067_c0 + 1.000000 M_cpd00046_c0 + 1.000000 M_cpd12554_c0		0	0	0	0	0	0	0	0	0	0	0	0
R_rxn07261_c0	R07384	2.000000 H+[c0] + 1.000000 CMP[c0] + 1.000000 Plasmenylethanolamine[c0] <=> 1.000000 CDPethanolamine[c0] + 1.000000 1-Alkenyl-2-acylglycerol[c0]	2.000000 M_cpd00067_c0 + 1.000000 M_cpd00046_c0 + 1.000000 M_cpd12606_c0 <=> 1.000000 M_cpd00444_c0 + 1.000000 M_cpd12322_c0		0	0	0	0	0	0	0	0	0	0	0	0
R_rxn07295_c0	glycine oxidase	1.000000 Glycine[c0] => 3.000000 H+[c0] + 1.000000 Iminoglycine[c0]	1.000000 M_cpd00033_c0 => 3.000000 M_cpd00067_c0 + 1.000000 M_cpd14545_c0		0	0	0	0	0	0	0	0	0	0	0	0
R_rxn07312_c0	R07481	1.000000 S-Adenosyl-L-methionine[c0] + 1.000000 Cycloartenol[c0] <=> 1.000000 H+[c0] + 1.000000 S-Adenosyl-homocysteine[c0] + 1.000000 24-Methylenecycloartanol[c0]	1.000000 M_cpd00017_c0 + 1.000000 M_cpd01306_c0 <=> 1.000000 M_cpd00067_c0 + 1.000000 M_cpd00019_c0 + 1.000000 M_cpd05727_c0		0	0	0	0	0	0	0	0	0	0	0	0
R_rxn07346_c0	2,6-dihydroxypseudooxynicotinehydrolase	1.000000 H2O[c0] + 1.000000 2,6-Dihydroxypseudooxynicotine[c0] <=> 1.000000 H+[c0] + 1.000000 2,6-Dihydroxypyridine[c0] + 1.000000 4-Methylaminobutyrate[c0]	1.000000 M_cpd00001_c0 + 1.000000 M_cpd14710_c0 <=> 1.000000 M_cpd00067_c0 + 1.000000 M_cpd01955_c0 + 1.000000 M_cpd14711_c0		0	0	0	0	0	0	0	0	0	0	0	0
R_rxn07438_c0	peptide-methionine:thioredoxin-disulfide S-oxidoreductase	1.000000 H2O[c0] + 1.000000 trdox[c0] + 1.000000 Peptide-L-methionine[c0] <=> 1.000000 trdrd[c0] + 1.000000 Peptide-L-methionine (R)-S-oxide[c0]	1.000000 M_cpd00001_c0 + 1.000000 M_cpd11420_c0 + 1.000000 M_cpd12237_c0 <=> 1.000000 M_cpd11421_c0 + 1.000000 M_cpd14507_c0		0	0	0	0	0	0	0	0	0	0	0	0
R_rxn07449_c0	3-sulfolactate bisulfite-lyase	1.000000 3-Sulfolactate[c0] <=> 1.000000 Pyruvate[c0] + 1.000000 Sulfite[c0]	1.000000 M_cpd14790_c0 <=> 1.000000 M_cpd00020_c0 + 1.000000 M_cpd00081_c0		0	0	0	0	0	0	0	0	0	0	0	0
R_rxn07454_c0	(Z)-phenylacetaldehyde-oxime hydro-lyase	1.000000 (Z)-Phenylacetaldehyde oxime[c0] <=> 1.000000 H2O[c0] + 1.000000 Benzyl cyanide[c0]	1.000000 M_cpd14796_c0 <=> 1.000000 M_cpd00001_c0 + 1.000000 M_cpd14795_c0		0	0	0	0	0	0	0	0	0	0	0	0
R_rxn07488_c0	R07673	1.000000 GDP-L-gulose[c0] <=> 1.000000 GDP-L-galactose[c0]	1.000000 M_cpd14654_c0 <=> 1.000000 M_cpd01536_c0		0	0	0	0	0	0	0	0	0	0	0	0
R_rxn07493_c0	R07678	1.000000 H+[c0] + 1.000000 Phosphate[c0] + 1.000000 GDP-L-galactose[c0] <=> 1.000000 GDP[c0] + 1.000000 L-Galactose 1-phosphate[c0]	1.000000 M_cpd00067_c0 + 1.000000 M_cpd00009_c0 + 1.000000 M_cpd01536_c0 <=> 1.000000 M_cpd00031_c0 + 1.000000 M_cpd14655_c0		0	0	0	0	0	0	0	0	0	0	0	0
R_rxn07579_c0	R07765	1.000000 H+[c0] + 1.000000 NADH[c0] + 1.000000 (2E)-Octadecenoyl-[acp][c0] <=> 1.000000 NAD[c0] + 1.000000 Stearoyl-[acyl-carrier protein][c0]	1.000000 M_cpd00067_c0 + 1.000000 M_cpd00004_c0 + 1.000000 M_cpd14940_c0 <=> 1.000000 M_cpd00003_c0 + 1.000000 M_cpd12458_c0		0	0.0204671	0.0204671	0.0204671	0.0204671	0.0204671	0.0204671	0.0204671	0	0.0204671	0.00273252	0.00273251
R_rxn07609_c0	R07802	1.000000 H2O[c0] + 1.000000 2-Hydroxy-6-oxo-6-(2-carboxyphenyl)-hexa-2,4-dienoate[c0] <=> 1.000000 H+[c0] + 1.000000 Oxopent-4-enoate[c0] + 1.000000 Phthalate[c0]	1.000000 M_cpd00001_c0 + 1.000000 M_cpd14980_c0 <=> 1.000000 M_cpd00067_c0 + 1.000000 M_cpd00461_c0 + 1.000000 M_cpd01129_c0		0	0	0	0	0	0	0	0	0	0	0	0
R_rxn07622_c0	R07831	1.000000 H2O[c0] + 1.000000 Dihydrophloroglucinol[c0] <=> 1.000000 H+[c0] + 1.000000 3-Hydroxy-5-oxohexanoate[c0]	1.000000 M_cpd00001_c0 + 1.000000 M_cpd04107_c0 <=> 1.000000 M_cpd00067_c0 + 1.000000 M_cpd14988_c0		0	0	0	0	0	0	0	0	0	0	0	0
R_rxn07623_c0	3-hydroxy-5-oxohexanoyl-CoA:acetate CoA-transferase	1 Acetyl-CoA[c0] + 1 3-Hydroxy-5-oxohexanoate[c0] <=> 1 Acetate[c0] + 1 3-Hydroxy-5-oxohexanoyl-CoA[c0]	1 M_cpd00022_c0 + 1 M_cpd14988_c0 <=> 1 M_cpd00029_c0 + 1 M_cpd14989_c0		0	0	0	0	0	0	0	0	0	0	0	0
R_rxn07624_c0	R07833	1 CoA[c0] + 1 3-Hydroxy-5-oxohexanoyl-CoA[c0] <=> 1 Acetyl-CoA[c0] + 1 (S)-3-Hydroxybutyryl-CoA[c0]	1 M_cpd00010_c0 + 1 M_cpd14989_c0 <=> 1 M_cpd00022_c0 + 1 M_cpd00842_c0		0	0	0	0	0	0	0	0	0	0	0	0
R_rxn07670_c0	hydroxycinnamoyl-CoA:anthocyanidin 3,5-diglucoside 5-O-glucoside-6'''-O-hydroxycinnamoyltransferase	1.000000 4-Coumaroyl-CoA[c0] + 1.000000 Pelargonin[c0] <=> 1.000000 CoA[c0] + 1.000000 Pelargonidin 3-O-beta-D-glucoside 5-O-(6-coumaroyl-beta-D-glucoside)[c0]	1.000000 M_cpd00192_c0 + 1.000000 M_cpd05630_c0 <=> 1.000000 M_cpd00010_c0 + 1.000000 M_cpd15065_c0		0	0	0	0	0	0	0	0	0	0	0	0
R_rxn07672_c0	hydroxycinnamoyl-CoA:anthocyanidin 3,5-diglucoside 5-O-glucoside-6'''-O-hydroxycinnamoyltransferase	1.000000 4-Coumaroyl-CoA[c0] + 1.000000 Cyanin[c0] <=> 1.000000 CoA[c0] + 1.000000 Cyanidin 3-O-beta-D-glucoside 5-O-(6-coumaroyl-beta-D-glucoside)[c0]	1.000000 M_cpd00192_c0 + 1.000000 M_cpd05546_c0 <=> 1.000000 M_cpd00010_c0 + 1.000000 M_cpd15066_c0		0	0	0	0	0	0	0	0	0	0	0	0
R_rxn07673_c0	hydroxycinnamoyl-CoA:anthocyanidin 3,5-diglucoside 5-O-glucoside-6'''-O-hydroxycinnamoyltransferase	1.000000 4-Coumaroyl-CoA[c0] + 1.000000 Delphin[c0] <=> 1.000000 CoA[c0] + 1.000000 Delphinidin 3-O-beta-D-glucoside 5-O-(6-coumaroyl-beta-D-glucoside)[c0]	1.000000 M_cpd00192_c0 + 1.000000 M_cpd15028_c0 <=> 1.000000 M_cpd00010_c0 + 1.000000 M_cpd15067_c0		0	0	0	0	0	0	0	0	0	0	0	0
R_rxn07720_c0	hydroxycinnamoyl-CoA:anthocyanidin 3,5-diglucoside 5-O-glucoside-6'''-O-hydroxycinnamoyltransferase	1.000000 Pelargonin[c0] + 1.000000 Caffeoyl-CoA[c0] <=> 1.000000 CoA[c0] + 1.000000 Pelargonidin 3-glucoside 5-caffeoylglucoside[c0]	1.000000 M_cpd05630_c0 + 1.000000 M_cpd00270_c0 <=> 1.000000 M_cpd00010_c0 + 1.000000 M_cpd15087_c0		0	0	0	0	0	0	0	0	0	0	0	0
R_rxn07721_c0	hydroxycinnamoyl-CoA:anthocyanidin 3,5-diglucoside 5-O-glucoside-6'''-O-hydroxycinnamoyltransferase	1.000000 Caffeoyl-CoA[c0] + 1.000000 Cyanin[c0] <=> 1.000000 CoA[c0] + 1.000000 Cyanidin 3-glucoside 5-caffeoylglucoside[c0]	1.000000 M_cpd00270_c0 + 1.000000 M_cpd05546_c0 <=> 1.000000 M_cpd00010_c0 + 1.000000 M_cpd15088_c0		0	0	0	0	0	0	0	0	0	0	0	0
R_rxn07734_c0	hydroxycinnamoyl-CoA:anthocyanidin 3,5-diglucoside 5-O-glucoside-6'''-O-hydroxycinnamoyltransferase	1.000000 Caffeoyl-CoA[c0] + 1.000000 Delphin[c0] <=> 1.000000 CoA[c0] + 1.000000 Delphinidin 3-glucoside 5-caffoyl-glucoside[c0]	1.000000 M_cpd00270_c0 + 1.000000 M_cpd15028_c0 <=> 1.000000 M_cpd00010_c0 + 1.000000 M_cpd15029_c0		0	0	0	0	0	0	0	0	0	0	0	0
R_rxn07841_c0	2-Isopentenyl-diphosphate:ATP delta2-isopentenyltransferase	1.000000 ATP[c0] + 1.000000 DMAPP[c0] <=> 1.000000 PPi[c0] + 1.000000 H+[c0] + 1.000000 Isopentenyl-ATP[c0]	1.000000 M_cpd00002_c0 + 1.000000 M_cpd00202_c0 <=> 1.000000 M_cpd00012_c0 + 1.000000 M_cpd00067_c0 + 1.000000 M_cpd15130_c0		0	0	0	0	0	0	0	0	0	0	0	0
R_rxn07842_c0	2-Isopentenyl-diphosphate:ADP delta2-isopentenyltransferase	1.000000 ADP[c0] + 1.000000 DMAPP[c0] <=> 1.000000 PPi[c0] + 1.000000 H+[c0] + 1.000000 Isopentenyl-ADP[c0]	1.000000 M_cpd00008_c0 + 1.000000 M_cpd00202_c0 <=> 1.000000 M_cpd00012_c0 + 1.000000 M_cpd00067_c0 + 1.000000 M_cpd15131_c0		0	0	0	0	0	0	0	0	0	0	0	0
R_rxn07847_c0	R08058	1.000000 H4MPT[c0] + 1.000000 Formaldehyde[c0] => 1.000000 5,10-Methylenetetrahydromethanopterin[c0] + 1.000000 H2O[c0]	1.000000 M_cpd00895_c0 + 1.000000 M_cpd00055_c0 => 1.000000 M_cpd02679_c0 + 1.000000 M_cpd00001_c0		0	-2.27e-08	0	-1.76e-08	0	-1.76e-08	0	-1.76e-08	0	4.48027	0	5.9e-09
R_rxn07849_c0	R08060	1.0 Formylmethanofuran[c0] + 1.0 H2O[c0] => 1.0 Formate[c0] + 1.0 Methanofuran[c0]	1.0 M_cpd00735_c0 + 1.0 M_cpd00001_c0 => 1.0 M_cpd00047_c0 + 1.0 M_cpd00643_c0		0	-2.27e-08	0	-1.76e-08	0	-1.76e-08	0	-1.76e-08	0	4.48027	0	5.9e-09
R_rxn07875_c0	R08086	1.000000 H2O[c0] + 1.000000 NAD[c0] + 1.000000 Geranial[c0] <=> 2.000000 H+[c0] + 1.000000 NADH[c0] + 1.000000 Geranic acid[c0]	1.000000 M_cpd00001_c0 + 1.000000 M_cpd00003_c0 + 1.000000 M_cpd01061_c0 <=> 2.000000 M_cpd00067_c0 + 1.000000 M_cpd00004_c0 + 1.000000 M_cpd15165_c0		0	0	0	0	0	0	0	0	0	0	0	0
R_rxn07876_c0	R08087	1.000000 H2O[c0] + 1.000000 NAD[c0] + 1.000000 (R)-(+)-Citronellal[c0] <=> 2.000000 H+[c0] + 1.000000 NADH[c0] + 1.000000 Citronellate[c0]	1.000000 M_cpd00001_c0 + 1.000000 M_cpd00003_c0 + 1.000000 M_cpd06739_c0 <=> 2.000000 M_cpd00067_c0 + 1.000000 M_cpd00004_c0 + 1.000000 M_cpd15166_c0		0	0	0	0	0	0	0	0	0	0	0	0
R_rxn07885_c0	R08096	1.000000 H2O[c0] + 1.000000 NAD[c0] + 1.000000 (S)-(-)-Citronellal[c0] <=> 2.000000 H+[c0] + 1.000000 NADH[c0] + 1.000000 Citronellate[c0]	1.000000 M_cpd00001_c0 + 1.000000 M_cpd00003_c0 + 1.000000 M_cpd08238_c0 <=> 2.000000 M_cpd00067_c0 + 1.000000 M_cpd00004_c0 + 1.000000 M_cpd15166_c0		0	0	0	0	0	0	0	0	0	0	0	0
R_rxn08084_c0	1-tetradecanoyl-sn-glycerol 3-phosphate O-acyltransferase (n-C14:0)	1 Myristoyl-ACP[c0] + 1 1-tetradecanoyl-sn-glycerol 3-phosphate[c0] => 1 ACP[c0] + 1 1,2-ditetradecanoyl-sn-glycerol 3-phosphate[c0]	1 M_cpd11466_c0 + 1 M_cpd15331_c0 => 1 M_cpd11493_c0 + 1 M_cpd15522_c0		0	14.0027	0	8.33046	0	8.89049	0	131.811	0	124.275	0	10.4703
R_rxn08094_c0	2-Oxoglutarate dehydrogenase complex	1.000000 CoA[c0] + 1.000000 NAD[c0] + 1.000000 2-Oxoglutarate[c0] => 1.000000 NADH[c0] + 1.000000 CO2[c0] + 1.000000 Succinyl-CoA[c0]	1.000000 M_cpd00010_c0 + 1.000000 M_cpd00003_c0 + 1.000000 M_cpd00024_c0 => 1.000000 M_cpd00004_c0 + 1.000000 M_cpd00011_c0 + 1.000000 M_cpd00078_c0		0	-4.55e-08	0	-1.76e-08	0	-1.76e-08	0	-1.76e-08	0	4.48027	0	5.9e-09
R_rxn08118_c0	D-allulose-6-phosphate 3-epimerase	1.000000 Allulose 6-phosphate[c0] <=> 1.000000 H+[c0] + 1.000000 D-fructose-6-phosphate[c0]	1.000000 M_cpd15394_c0 <=> 1.000000 M_cpd00067_c0 + 1.000000 M_cpd00072_c0		0	0	0	0	0	0	0	0	0	0	0	0
R_rxn08126_c0	Amylomaltase (maltotriose)	1.000000 Maltose[c0] + 1.000000 Amylotriose[c0] <=> 1.000000 Maltotetraose[c0] + 1.000000 D-Glucose[c0]	1.000000 M_cpd00179_c0 + 1.000000 M_cpd01262_c0 <=> 1.000000 M_cpd01399_c0 + 1.000000 M_cpd00027_c0		0	0	0	0	0	0	0	0	0	0	0	0
R_rxn08127_c0	Amylomaltase (maltotetraose)	1.000000 Maltose[c0] + 1.000000 Maltotetraose[c0] <=> 1.000000 D-Glucose[c0] + 1.000000 Maltopentaose[c0]	1.000000 M_cpd00179_c0 + 1.000000 M_cpd01399_c0 <=> 1.000000 M_cpd00027_c0 + 1.000000 M_cpd15495_c0		0	0	0	0	0	0	0	0	0	0	0	0
R_rxn08128_c0	Amylomaltase (maltopentaose)	1.000000 Maltose[c0] + 1.000000 Maltopentaose[c0] <=> 1.000000 D-Glucose[c0] + 1.000000 Maltohexaose[c0]	1.000000 M_cpd00179_c0 + 1.000000 M_cpd15495_c0 <=> 1.000000 M_cpd00027_c0 + 1.000000 M_cpd01329_c0		0	0	0	0	0	0	0	0	0	0	0	0
R_rxn08129_c0	Amylomaltase (maltohexaose)	1.000000 Maltose[c0] + 1.000000 Maltohexaose[c0] <=> 1.000000 D-Glucose[c0] + 1.000000 Maltoheptaose[c0]	1.000000 M_cpd00179_c0 + 1.000000 M_cpd01329_c0 <=> 1.000000 M_cpd00027_c0 + 1.000000 M_cpd15494_c0		0	0	0	0	0	0	0	0	0	0	0	0
R_rxn08130_c0	ADOMET-DMK-METHYLTRANSFER-RXN.c	1.0 S-Adenosyl-L-methionine[c0] + 1.0 2-Demethylmenaquinol 8[c0] => 1.0 S-Adenosyl-homocysteine[c0] + 1.0 Menaquinol 8[c0]	1.0 M_cpd00017_c0 + 1.0 M_cpd15353_c0 => 1.0 M_cpd00019_c0 + 1.0 M_cpd15499_c0		0	0.0009	0	0.0009	0	0.0009	0	0.0009	0	0.0009	0	0.000120157
R_rxn08131_c0	4-amino-2-methyl-5-phosphomethylpyrimidine synthetase	1.000000 H2O[c0] + 1.000000 NAD[c0] + 1.000000 AIR[c0] => 4.000000 H+[c0] + 1.000000 NADH[c0] + 2.000000 Formate[c0] + 1.000000 4-Amino-5-phosphomethyl-2-methylpyrimidine[c0]	1.000000 M_cpd00001_c0 + 1.000000 M_cpd00003_c0 + 1.000000 M_cpd02140_c0 => 4.000000 M_cpd00067_c0 + 1.000000 M_cpd00004_c0 + 2.000000 M_cpd00047_c0 + 1.000000 M_cpd02775_c0		0.0027	0.00269998	0.0027	0.00269998	0.0027	0.00269998	0.0027	0.00269998	0.0027	4.48297	0.000360471	0.000360477
R_rxn08180_c0	Biotin synthase	1.000000 S-Adenosyl-L-methionine[c0] + 1.000000 S[c0] + 1.000000 Dethiobiotin[c0] => 1.000000 H+[c0] + 1.000000 L-Methionine[c0] + 1.000000 BIOT[c0] + 1.000000 5'-Deoxyadenosine[c0]	1.000000 M_cpd00017_c0 + 1.000000 M_cpd00074_c0 + 1.000000 M_cpd01311_c0 => 1.000000 M_cpd00067_c0 + 1.000000 M_cpd00060_c0 + 1.000000 M_cpd00104_c0 + 1.000000 M_cpd03091_c0		0	0	0	0	0	0	0	0	0	0	0	0
R_rxn08294_c0	diacylglycerol kinase (n-C12:0)	1.000000 ATP[c0] + 1.000000 1,2-Diacyl-sn-glycerol didodecanoyl[c0] <=> 1.000000 ADP[c0] + 1.000000 1,2-didodecanoyl-sn-glycerol 3-phosphate[c0]	1.000000 M_cpd00002_c0 + 1.000000 M_cpd15306_c0 <=> 1.000000 M_cpd00008_c0 + 1.000000 M_cpd15521_c0		0	0	0	0	0	0	0	0	0	0	0	0
R_rxn08295_c0	diacylglycerol kinase (n-C14:0)	1.000000 ATP[c0] + 1.000000 1,2-Diacyl-sn-glycerol ditetradecanoyl[c0] <=> 1.000000 ADP[c0] + 1.000000 1,2-ditetradecanoyl-sn-glycerol 3-phosphate[c0]	1.000000 M_cpd00002_c0 + 1.000000 M_cpd15307_c0 <=> 1.000000 M_cpd00008_c0 + 1.000000 M_cpd15522_c0		0	0	0	0	0	0	0	0	0	0	0	0
R_rxn08296_c0	diacylglycerol kinase (n-C14:1)	1.000000 ATP[c0] + 1.000000 1,2-Diacyl-sn-glycerol ditetradec-7-enoyl[c0] <=> 1.000000 ADP[c0] + 1.000000 1,2-ditetradec-7-enoyl-sn-glycerol 3-phosphate[c0]	1.000000 M_cpd00002_c0 + 1.000000 M_cpd15308_c0 <=> 1.000000 M_cpd00008_c0 + 1.000000 M_cpd15523_c0		0	0	0	0	0	0	0	0	0	0	0	0
R_rxn08297_c0	diacylglycerol kinase (n-C16:0)	1.000000 ATP[c0] + 1.000000 1,2-Diacyl-sn-glycerol dihexadecanoyl[c0] <=> 1.000000 ADP[c0] + 1.000000 1,2-dihexadecanoyl-sn-glycerol 3-phosphate[c0]	1.000000 M_cpd00002_c0 + 1.000000 M_cpd15309_c0 <=> 1.000000 M_cpd00008_c0 + 1.000000 M_cpd15524_c0		0	0	0	0	0	0	0	0	0	0	0	0
R_rxn08298_c0	diacylglycerol kinase (n-C16:1)	1.000000 ATP[c0] + 1.000000 1,2-Diacyl-sn-glycerol dihexadec-9-enoyl[c0] <=> 1.000000 ADP[c0] + 1.000000 1,2-dihexadec-9-enoyl-sn-glycerol 3-phosphate[c0]	1.000000 M_cpd00002_c0 + 1.000000 M_cpd15310_c0 <=> 1.000000 M_cpd00008_c0 + 1.000000 M_cpd15525_c0		0	0	0	0	0	0	0	0	0	0	0	0
R_rxn08299_c0	diacylglycerol kinase (n-C18:0)	1.000000 ATP[c0] + 1.000000 1,2-Diacyl-sn-glycerol dioctadecanoyl[c0] <=> 1.000000 ADP[c0] + 1.000000 1,2-dioctadecanoyl-sn-glycerol 3-phosphate[c0]	1.000000 M_cpd00002_c0 + 1.000000 M_cpd15311_c0 <=> 1.000000 M_cpd00008_c0 + 1.000000 M_cpd15526_c0		0	0	0	0	0	0	0	0	0	0	0	0
R_rxn08300_c0	diacylglycerol kinase (n-C18:1)	1.000000 ATP[c0] + 1.000000 1,2-Diacyl-sn-glycerol dioctadec-11-enoyl[c0] <=> 1.000000 ADP[c0] + 1.000000 1,2-dioctadec-11-enoyl-sn-glycerol 3-phosphate[c0]	1.000000 M_cpd00002_c0 + 1.000000 M_cpd15312_c0 <=> 1.000000 M_cpd00008_c0 + 1.000000 M_cpd15527_c0		0	0	0	0	0	0	0	0	0	0	0	0
R_rxn08306_c0	CDP-diacylglycerol synthetase (n-C12:0)	1.000000 CTP[c0] + 1.000000 1,2-didodecanoyl-sn-glycerol 3-phosphate[c0] <=> 1.000000 PPi[c0] + 1.000000 H+[c0] + 1.000000 CDP-1,2-didodecanoylglycerol[c0]	1.000000 M_cpd00052_c0 + 1.000000 M_cpd15521_c0 <=> 1.000000 M_cpd00012_c0 + 1.000000 M_cpd00067_c0 + 1.000000 M_cpd15417_c0		0	0	0	0	0	0	0	0	0	0	0	0
R_rxn08307_c0	CDP-diacylglycerol synthetase (n-C14:0)	1.000000 CTP[c0] + 1.000000 1,2-ditetradecanoyl-sn-glycerol 3-phosphate[c0] <=> 1.000000 PPi[c0] + 1.000000 H+[c0] + 1.000000 CDP-1,2-ditetradecanoylglycerol[c0]	1.000000 M_cpd00052_c0 + 1.000000 M_cpd15522_c0 <=> 1.000000 M_cpd00012_c0 + 1.000000 M_cpd00067_c0 + 1.000000 M_cpd15423_c0		0	0	0	0	0	0	0	0	0	0	0	0
R_rxn08308_c0	CDP-diacylglycerol synthetase (n-C14:1)	1.000000 CTP[c0] + 1.000000 1,2-ditetradec-7-enoyl-sn-glycerol 3-phosphate[c0] <=> 1.000000 PPi[c0] + 1.000000 H+[c0] + 1.000000 CDP-1,2-ditetradec-7-enoylglycerol[c0]	1.000000 M_cpd00052_c0 + 1.000000 M_cpd15523_c0 <=> 1.000000 M_cpd00012_c0 + 1.000000 M_cpd00067_c0 + 1.000000 M_cpd15422_c0		0	0	0	0	0	0	0	0	0	0	0	0
R_rxn08309_c0	CDP-diacylglycerol synthetase (n-C16:0)	1.000000 CTP[c0] + 1.000000 1,2-dihexadecanoyl-sn-glycerol 3-phosphate[c0] <=> 1.000000 PPi[c0] + 1.000000 H+[c0] + 1.000000 CDP-1,2-dihexadecanoylglycerol[c0]	1.000000 M_cpd00052_c0 + 1.000000 M_cpd15524_c0 <=> 1.000000 M_cpd00012_c0 + 1.000000 M_cpd00067_c0 + 1.000000 M_cpd15419_c0		0	0	0	0	0	0	0	0	0	0	0	0
R_rxn08310_c0	CDP-diacylglycerol synthetase (n-C16:1)	1.000000 CTP[c0] + 1.000000 1,2-dihexadec-9-enoyl-sn-glycerol 3-phosphate[c0] <=> 1.000000 PPi[c0] + 1.000000 H+[c0] + 1.000000 CDP-1,2-dihexadec-9-enoylglycerol[c0]	1.000000 M_cpd00052_c0 + 1.000000 M_cpd15525_c0 <=> 1.000000 M_cpd00012_c0 + 1.000000 M_cpd00067_c0 + 1.000000 M_cpd15418_c0		0	0	0	0	0	0	0	0	0	0	0	0
R_rxn08311_c0	CDP-diacylglycerol synthetase (n-C18:0)	1.000000 CTP[c0] + 1.000000 1,2-dioctadecanoyl-sn-glycerol 3-phosphate[c0] <=> 1.000000 PPi[c0] + 1.000000 H+[c0] + 1.000000 CDP-1,2-dioctadecanoylglycerol[c0]	1.000000 M_cpd00052_c0 + 1.000000 M_cpd15526_c0 <=> 1.000000 M_cpd00012_c0 + 1.000000 M_cpd00067_c0 + 1.000000 M_cpd15421_c0		0.0100941	0.0100941	0.0100941	0.0100941	0.0100941	0.0100941	0.0100941	0.0100941	0.0100941	0.0100941	0.00134764	0.00134764
R_rxn08312_c0	CDP-diacylglycerol synthetase (n-C18:1)	1.000000 CTP[c0] + 1.000000 1,2-dioctadec-11-enoyl-sn-glycerol 3-phosphate[c0] <=> 1.000000 PPi[c0] + 1.000000 H+[c0] + 1.000000 CDP-1,2-dioctadec-11-enoylglycerol[c0]	1.000000 M_cpd00052_c0 + 1.000000 M_cpd15527_c0 <=> 1.000000 M_cpd00012_c0 + 1.000000 M_cpd00067_c0 + 1.000000 M_cpd15420_c0		0	0	0	0	0	0	0	0	0	0	0	0
R_rxn08333_c0	1,4-dihydroxy-2-naphthoate octaprenyltransferase	1.000000 Farnesylfarnesylgeraniol[c0] + 1.000000 1-4-Dihydroxy-2-naphthoate[c0] => 1.000000 PPi[c0] + 1.000000 CO2[c0] + 1.000000 2-Demethylmenaquinol 8[c0]	1.000000 M_cpd02557_c0 + 1.000000 M_cpd02295_c0 => 1.000000 M_cpd00012_c0 + 1.000000 M_cpd00011_c0 + 1.000000 M_cpd15353_c0		0.0018	0.0018	0.0018	0.0018	0.0018	0.0018	0.0018	0.0018	0.0018	0.0018	0.000240314	0.000240314
R_rxn08352_c0	R08210	1.000000 H+[c0] + 1.000000 NADH[c0] + 1.000000 1-Hydroxy-2-methyl-2-butenyl 4-diphosphate[c0] => 1.000000 H2O[c0] + 1.000000 NAD[c0] + 1.000000 DMAPP[c0]	1.000000 M_cpd00067_c0 + 1.000000 M_cpd00004_c0 + 1.000000 M_cpd08615_c0 => 1.000000 M_cpd00001_c0 + 1.000000 M_cpd00003_c0 + 1.000000 M_cpd00202_c0		0	0.0943637	0	0.0943637	0	0.0943637	0	0.0943637	0	0.997947	0	0.0125983
R_rxn08467_c0	RXN-13418.c	1.000000 O2[c0] + 1.000000 FMNH2[c0] + 1.000000 Isethionate[c0] => 1.000000 H+[c0] + 1.000000 H2O[c0] + 1.000000 Glycolaldehyde[c0] + 1.000000 Sulfite[c0] + 1.000000 FMN[c0]	1.000000 M_cpd00007_c0 + 1.000000 M_cpd01270_c0 + 1.000000 M_cpd03048_c0 => 1.000000 M_cpd00067_c0 + 1.000000 M_cpd00001_c0 + 1.000000 M_cpd00229_c0 + 1.000000 M_cpd00081_c0 + 1.000000 M_cpd00050_c0		0	-2.27e-08	0	-1.76e-08	0	-1.76e-08	0	-1.76e-08	0	4.48027	0	5.9e-09
R_rxn08468_c0	FMNH2-dependent monooxygenase (methanesulfonate)	1.000000 O2[c0] + 1.000000 FMNH2[c0] + 1.000000 methanesulfonate[c0] => 1.000000 H+[c0] + 1.000000 H2O[c0] + 1.000000 Sulfite[c0] + 1.000000 FMN[c0] + 1.000000 Formaldehyde[c0]	1.000000 M_cpd00007_c0 + 1.000000 M_cpd01270_c0 + 1.000000 M_cpd08023_c0 => 1.000000 M_cpd00067_c0 + 1.000000 M_cpd00001_c0 + 1.000000 M_cpd00081_c0 + 1.000000 M_cpd00050_c0 + 1.000000 M_cpd00055_c0		0	0	0	0	0	0	0	0	0	0	0	0
R_rxn08469_c0	FMNH2-dependent monooxygenase (ethanesulfonate)	1.000000 O2[c0] + 1.000000 FMNH2[c0] + 1.000000 ethanesulfonate[c0] => 1.000000 H+[c0] + 1.000000 H2O[c0] + 1.000000 Acetaldehyde[c0] + 1.000000 Sulfite[c0] + 1.000000 FMN[c0]	1.000000 M_cpd00007_c0 + 1.000000 M_cpd01270_c0 + 1.000000 M_cpd11579_c0 => 1.000000 M_cpd00067_c0 + 1.000000 M_cpd00001_c0 + 1.000000 M_cpd00071_c0 + 1.000000 M_cpd00081_c0 + 1.000000 M_cpd00050_c0		0	0	0	0	0	0	0	0	0	0	0	0
R_rxn08470_c0	FMNH2-dependent monooxygenase (butanesulfonate)	1.000000 O2[c0] + 1.000000 FMNH2[c0] + 1.000000 butanesulfonate[c0] => 1.000000 H+[c0] + 1.000000 H2O[c0] + 1.000000 Sulfite[c0] + 1.000000 FMN[c0] + 1.000000 Butanal[c0]	1.000000 M_cpd00007_c0 + 1.000000 M_cpd01270_c0 + 1.000000 M_cpd11596_c0 => 1.000000 M_cpd00067_c0 + 1.000000 M_cpd00001_c0 + 1.000000 M_cpd00081_c0 + 1.000000 M_cpd00050_c0 + 1.000000 M_cpd01011_c0		0	0	0	0	0	0	0	0	0	0	0	0
R_rxn08471_c0	FMNH2-dependent monooxygenase (sulfoacetate)	1.000000 O2[c0] + 1.000000 FMNH2[c0] + 1.000000 Sulfoacetate[c0] => 1.000000 H+[c0] + 1.000000 H2O[c0] + 1.000000 Sulfite[c0] + 1.000000 Glyoxalate[c0] + 1.000000 FMN[c0]	1.000000 M_cpd00007_c0 + 1.000000 M_cpd01270_c0 + 1.000000 M_cpd09878_c0 => 1.000000 M_cpd00067_c0 + 1.000000 M_cpd00001_c0 + 1.000000 M_cpd00081_c0 + 1.000000 M_cpd00040_c0 + 1.000000 M_cpd00050_c0		2.09281	6.57307	6.57307	6.57307	6.57307	6.57307	6.57307	9.28184	2.09281	15.9036	0.877557	0.877557
R_rxn08527_c0	fumarate reductase	1.000000 Fumarate[c0] + 1.000000 Menaquinol 8[c0] <=> 1.000000 Menaquinone 8[c0] + 1.000000 Succinate[c0]	1.000000 M_cpd00106_c0 + 1.000000 M_cpd15499_c0 <=> 1.000000 M_cpd15500_c0 + 1.000000 M_cpd00036_c0		-0.0863007	-0.0854008	-0.0863007	-0.0854008	-0.0863007	-0.0854008	-31.0762	-0.0710008	-26.5156	2.16913	-0.0115218	-0.0114017
R_rxn08528_c0	fumarate reductase	1.000000 Fumarate[c0] + 1.000000 2-Demethylmenaquinol 8[c0] <=> 1.000000 2-Demethylmenaquinone 8[c0] + 1.000000 Succinate[c0]	1.000000 M_cpd00106_c0 + 1.000000 M_cpd15353_c0 <=> 1.000000 M_cpd15352_c0 + 1.000000 M_cpd00036_c0		0.0009	0.00179995	0.0009	0.00179995	0.0009	0.00179995	0.0009	30.9917	0.0009	26.4311	0.000120157	0.00024033
R_rxn08556_c0	sn-glycerol 3-phosphate:ubiquinone-8 oxidoreductase	1.000000 Ubiquinone-8[c0] + 1.000000 Glycerol-3-phosphate[c0] => 1.000000 Ubiquinol-8[c0] + 1.000000 Glycerone-phosphate[c0]	1.000000 M_cpd15560_c0 + 1.000000 M_cpd00080_c0 => 1.000000 M_cpd15561_c0 + 1.000000 M_cpd00095_c0		0	31.9946	0	19.0296	0	20.3097	0	301.271	0	274.638	0	23.9306
R_rxn08557_c0	glycerol-3-phosphate dehydrogenase (menaquinone-8)	1.000000 Glycerol-3-phosphate[c0] + 1.000000 Menaquinone 8[c0] => 1.000000 Glycerone-phosphate[c0] + 1.000000 Menaquinol 8[c0]	1.000000 M_cpd00080_c0 + 1.000000 M_cpd15500_c0 => 1.000000 M_cpd00095_c0 + 1.000000 M_cpd15499_c0		0	-4.55e-08	0	-4.55e-08	0	-4.55e-08	0	30.9899	0	26.4293	0	1.58e-08
R_rxn08558_c0	anaerobic glycerol-3-phosphate dehydrogenase	1.000000 Glycerol-3-phosphate[c0] + 1.000000 2-Demethylmenaquinone 8[c0] => 1.000000 Glycerone-phosphate[c0] + 1.000000 2-Demethylmenaquinol 8[c0]	1.000000 M_cpd00080_c0 + 1.000000 M_cpd15352_c0 => 1.000000 M_cpd00095_c0 + 1.000000 M_cpd15353_c0		0	-4.55e-08	0	-4.55e-08	0	-4.55e-08	0	30.9899	0	26.4293	0	1.58e-08
R_rxn08583_c0	galactosyltransferase I (LPS core synthesis)	1.000000 UDP-glucose[c0] + 1.000000 glucosyl-inner core oligosaccharide lipid A[c0] => 1.000000 UDP[c0] + 1.000000 galactosyl-glucosyl-inner core oligosaccharide lipid A[c0]	1.000000 M_cpd00026_c0 + 1.000000 M_cpd15479_c0 => 1.000000 M_cpd00014_c0 + 1.000000 M_cpd15469_c0		0.000557761	0.000557759	0.000557761	0.000557759	0.000557761	0.000557759	0.000557761	0.000557759	0.000557761	0.000557759	7.44654e-05	7.4463e-05
R_rxn08615_c0	glycogen synthase (ADPGlc)	1.000000 ADPglucose[c0] + 1.000000 glycogen(n-1)[c0] <=> 1.000000 ADP[c0] + 1.000000 Glycogen[c0]	1.000000 M_cpd00387_c0 + 1.000000 M_cpd15302_c0 <=> 1.000000 M_cpd00008_c0 + 1.000000 M_cpd00155_c0		0	0	0	0	0	0	0	0	0	0	0	0
R_rxn08618_c0	glucosyltransferase I (LPS core synthesis)	1.000000 UDP-glucose[c0] + 1.000000 inner core oligosaccharide lipid A[c0] => 4.000000 H+[c0] + 1.000000 UDP[c0] + 1.000000 glucosyl-inner core oligosaccharide lipid A[c0]	1.000000 M_cpd00026_c0 + 1.000000 M_cpd15489_c0 => 4.000000 M_cpd00067_c0 + 1.000000 M_cpd00014_c0 + 1.000000 M_cpd15479_c0		0.000557761	0.000557759	0.000557761	0.000557759	0.000557761	0.000557759	0.000557761	0.000557759	0.000557761	0.000557759	7.44654e-05	7.4463e-05
R_rxn08619_c0	glucosyltransferase II (LPS core synthesis)	1.000000 UDP-glucose[c0] + 1.000000 galactosyl-glucosyl-inner core oligosaccharide lipid A[c0] => 1.000000 UDP[c0] + 1.000000 glucosyl-galactosyl-glucosyl-inner core oligosaccharide lipid A[c0]	1.000000 M_cpd00026_c0 + 1.000000 M_cpd15469_c0 => 1.000000 M_cpd00014_c0 + 1.000000 M_cpd15475_c0		0.000557761	0.000557759	0.000557761	0.000557759	0.000557761	0.000557759	0.000557761	0.000557759	0.000557761	0.000557759	7.44654e-05	7.4463e-05
R_rxn08620_c0	glucosyltransferase III (LPS core synthesis)	1.000000 UDP-glucose[c0] + 1.000000 glucosyl-galactosyl-glucosyl-inner core oligosaccharide lipid A[c0] => 1.000000 UDP[c0] + 1.000000 glucosyl-glucosyl-galactosyl-glucosyl-inner core oligosaccharide lipid A[c0]	1.000000 M_cpd00026_c0 + 1.000000 M_cpd15475_c0 => 1.000000 M_cpd00014_c0 + 1.000000 M_cpd15477_c0		0.000557761	0.000557759	0.000557761	0.000557759	0.000557761	0.000557759	0.000557761	0.000557759	0.000557761	0.000557759	7.44654e-05	7.4463e-05
R_rxn08669_c0	Glycerophosphodiester phosphodiesterase	1.000000 H2O[c0] + 1.000000 Glycerophosphoglycerol[c0] => 1.000000 H+[c0] + 1.000000 Glycerol-3-phosphate[c0] + 1.000000 Glycerol[c0]	1.000000 M_cpd00001_c0 + 1.000000 M_cpd02090_c0 => 1.000000 M_cpd00067_c0 + 1.000000 M_cpd00080_c0 + 1.000000 M_cpd00100_c0		0	0	0	0	0	0	0	0	0	0	0	0
R_rxn08707_c0	Heme O synthase, mitochondrial	1.000000 H2O[c0] + 1.000000 Farnesyldiphosphate[c0] + 1.000000 Heme[c0] <=> 1.000000 PPi[c0] + 1.000000 H+[c0] + 1.000000 hemeO[c0]	1.000000 M_cpd00001_c0 + 1.000000 M_cpd00350_c0 + 1.000000 M_cpd00028_c0 <=> 1.000000 M_cpd00012_c0 + 1.000000 M_cpd00067_c0 + 1.000000 M_cpd11313_c0		0	0	0	0	0	0	0	0	0	0	0	0
R_rxn08708_c0	LPS heptose kinase I (LPS core synthesis)	1.000000 ATP[c0] + 1.000000 heptosyl-heptosyl-kdo2-lipidA[c0] => 4.000000 H+[c0] + 1.000000 ADP[c0] + 1.000000 phospho-heptosyl-heptosyl-kdo2-lipidA[c0]	1.000000 M_cpd00002_c0 + 1.000000 M_cpd15484_c0 => 4.000000 M_cpd00067_c0 + 1.000000 M_cpd00008_c0 + 1.000000 M_cpd15549_c0		0.000557761	0.000557759	0.000557761	0.000557759	0.000557761	0.000557759	0.000557761	0.000557759	0.000557761	0.000557759	7.44654e-05	7.4463e-05
R_rxn08709_c0	LPS heptose kinase II (LPS core synthesis)	1.000000 ATP[c0] + 1.000000 heptosyl-phospho-heptosyl-heptosyl-kdo2-lipidA[c0] => 1.000000 H+[c0] + 1.000000 ADP[c0] + 1.000000 phospho-heptosyl-phospho-heptosyl-heptosyl-kdo2-lipidA[c0]	1.000000 M_cpd00002_c0 + 1.000000 M_cpd15488_c0 => 1.000000 M_cpd00067_c0 + 1.000000 M_cpd00008_c0 + 1.000000 M_cpd15550_c0		0.000557761	0.000557759	0.000557761	0.000557759	0.000557761	0.000557759	0.000557761	0.000557759	0.000557761	0.000557759	7.44654e-05	7.4463e-05
R_rxn08710_c0	RXN0-5118.c	3.000000 H+[c0] + 1.000000 ADP-L-glycero-D-manno-heptose[c0] + 1.000000 kdo2-lipid a[c0] => 1.000000 ADP[c0] + 1.000000 heptosyl-kdo2-lipidA[c0]	3.000000 M_cpd00067_c0 + 1.000000 M_cpd03831_c0 + 1.000000 M_cpd03587_c0 => 1.000000 M_cpd00008_c0 + 1.000000 M_cpd15485_c0		0.000557761	0.000557759	0.000557761	0.000557759	0.000557761	0.000557759	0.000557761	0.000557759	0.000557761	0.000557759	7.44654e-05	7.4463e-05
R_rxn08711_c0	RXN0-5061.c	1.000000 ADP-L-glycero-D-manno-heptose[c0] + 1.000000 heptosyl-kdo2-lipidA[c0] <=> 1.000000 ADP[c0] + 1.000000 heptosyl-heptosyl-kdo2-lipidA[c0]	1.000000 M_cpd03831_c0 + 1.000000 M_cpd15485_c0 <=> 1.000000 M_cpd00008_c0 + 1.000000 M_cpd15484_c0		0.000557761	0.000557759	0.000557761	0.000557759	0.000557761	0.000557759	0.000557761	0.000557759	0.000557761	0.000557759	7.44654e-05	7.4463e-05
R_rxn08712_c0	heptosyltransferase III (LPS core synthesis)	1.000000 ADP-L-glycero-D-manno-heptose[c0] + 1.000000 phospho-heptosyl-heptosyl-kdo2-lipidA[c0] => 1.000000 ADP[c0] + 1.000000 heptosyl-phospho-heptosyl-heptosyl-kdo2-lipidA[c0]	1.000000 M_cpd03831_c0 + 1.000000 M_cpd15549_c0 => 1.000000 M_cpd00008_c0 + 1.000000 M_cpd15488_c0		0.000557761	0.000557759	0.000557761	0.000557759	0.000557761	0.000557759	0.000557761	0.000557759	0.000557761	0.000557759	7.44654e-05	7.4463e-05
R_rxn08713_c0	heptosyltransferase IV (LPS core synthesis)	1.000000 ADP-L-glycero-D-manno-heptose[c0] + 1.000000 glucosyl-glucosyl-galactosyl-glucosyl-inner core oligosaccharide lipid A[c0] => 1.000000 ADP[c0] + 1.000000 core oligosaccharide lipid A[c0]	1.000000 M_cpd03831_c0 + 1.000000 M_cpd15477_c0 => 1.000000 M_cpd00008_c0 + 1.000000 M_cpd15432_c0		0.000557761	0.000557759	0.000557761	0.000557759	0.000557761	0.000557759	0.000557761	0.000557759	0.000557761	0.000557759	7.44654e-05	7.4463e-05
R_rxn08756_c0	isopentenyl-diphosphate:NAD+ oxidoreductase	1.000000 H+[c0] + 1.000000 NADH[c0] + 1.000000 1-Hydroxy-2-methyl-2-butenyl 4-diphosphate[c0] => 1.000000 H2O[c0] + 1.000000 NAD[c0] + 1.000000 Isopentenyldiphosphate[c0]	1.000000 M_cpd00067_c0 + 1.000000 M_cpd00004_c0 + 1.000000 M_cpd08615_c0 => 1.000000 M_cpd00001_c0 + 1.000000 M_cpd00003_c0 + 1.000000 M_cpd00113_c0		0	0.0943637	0	0.0943637	0	0.0943637	0	0.0943637	0	0.997947	0	0.0125983
R_rxn08792_c0	lactate oxidation	1.000000 Ubiquinone-8[c0] + 1.000000 L-Lactate[c0] => 1.000000 Pyruvate[c0] + 1.000000 Ubiquinol-8[c0]	1.000000 M_cpd15560_c0 + 1.000000 M_cpd00159_c0 => 1.000000 M_cpd00020_c0 + 1.000000 M_cpd15561_c0		0	31.9946	0	19.0296	0	20.3097	0	301.271	0	274.638	0	23.9306
R_rxn08793_c0	L-Lactate dehydrogenase (menaquinone)	1.000000 Menaquinone 8[c0] + 1.000000 L-Lactate[c0] => 1.000000 Pyruvate[c0] + 1.000000 Menaquinol 8[c0]	1.000000 M_cpd15500_c0 + 1.000000 M_cpd00159_c0 => 1.000000 M_cpd00020_c0 + 1.000000 M_cpd15499_c0		0	-4.55e-08	0	-4.55e-08	0	-4.55e-08	0	30.9899	0	26.4293	0	1.58e-08
R_rxn08796_c0	Lysophospholipase L1 (2-acylglycerophosphotidate, n-C12:0) (periplasm)	1.000000 H2O[c0] + 1.000000 1-dodecanoyl-sn-glycerol 3-phosphate[c0] <=> 1.000000 H+[c0] + 1.000000 Glycerol-3-phosphate[c0] + 1.000000 ddca[c0]	1.000000 M_cpd00001_c0 + 1.000000 M_cpd15325_c0 <=> 1.000000 M_cpd00067_c0 + 1.000000 M_cpd00080_c0 + 1.000000 M_cpd01741_c0		0	0	0	0	0	0	0	0	0	0	0	0
R_rxn08797_c0	Lysophospholipase L1 (2-acylglycerophosphotidate, n-C14:0) (periplasm)	1.000000 H2O[c0] + 1.000000 1-tetradecanoyl-sn-glycerol 3-phosphate[c0] <=> 1.000000 H+[c0] + 1.000000 Glycerol-3-phosphate[c0] + 1.000000 Myristic acid[c0]	1.000000 M_cpd00001_c0 + 1.000000 M_cpd15331_c0 <=> 1.000000 M_cpd00067_c0 + 1.000000 M_cpd00080_c0 + 1.000000 M_cpd03847_c0		0	0	0	0	0	0	0	0	0	0	0	0
R_rxn08798_c0	Lysophospholipase L1 (2-acylglycerophosphotidate, n-C14:1) (periplasm)	1.000000 H2O[c0] + 1.000000 1-tetradec-7-enoyl-sn-glycerol 3-phosphate[c0] => 2.000000 H+[c0] + 1.000000 Glycerol-3-phosphate[c0] + 1.000000 tetradecenoate[c0]	1.000000 M_cpd00001_c0 + 1.000000 M_cpd15330_c0 => 2.000000 M_cpd00067_c0 + 1.000000 M_cpd00080_c0 + 1.000000 M_cpd15298_c0		0	0	0	0	0	0	0	0	0	0	0	0
R_rxn08799_c0	Lysophospholipase L1 (2-acylglycerophosphotidate, n-C16:0) (periplasm)	1.000000 H2O[c0] + 1.000000 1-hexadecanoyl-sn-glycerol 3-phosphate[c0] <=> 2.000000 H+[c0] + 1.000000 Glycerol-3-phosphate[c0] + 1.000000 Palmitate[c0]	1.000000 M_cpd00001_c0 + 1.000000 M_cpd15327_c0 <=> 2.000000 M_cpd00067_c0 + 1.000000 M_cpd00080_c0 + 1.000000 M_cpd00214_c0		0	0	0	0	0	0	0	0	0	0	0	0
R_rxn08800_c0	Lysophospholipase L1 (2-acylglycerophosphotidate, n-C16:1) (periplasm)	1.000000 H2O[c0] + 1.000000 1-hexadec-9-enoyl-sn-glycerol 3-phosphate[c0] <=> 2.000000 H+[c0] + 1.000000 hexadecenoate[c0] + 1.000000 Glycerol-3-phosphate[c0]	1.000000 M_cpd00001_c0 + 1.000000 M_cpd15326_c0 <=> 2.000000 M_cpd00067_c0 + 1.000000 M_cpd15237_c0 + 1.000000 M_cpd00080_c0		0	0	0	0	0	0	0	0	0	0	0	0
[truncated: 296 more rows]

## Sheet: FVA ML conditions
id	Name	equation	eqn_modelseed	CH4:O2	Rich FVA min	Rich FVA max	O2-limited FVA min	O2-limited FVA max	N2-limited FVA min	N2-limited FVA mAX	CH4-limited FVA min	CH42-limited FVA mAX	natural FVA min MB:ML = 9.3:1.0	natural FVA max MB:ML = 9.3:1.0	synthetic FVA min MB:ML = 0.05:1.0	synthetic FVA max MB:ML = 0.05:1.0
[truncated: 1,481 more rows]

## Sheet: MB flux_conditions
id	Name	equation	CH4-limiting	O2 limiting	Rich	N2-limiting	Natural (MB:ML = 9.3:1.0)	Synthetic (MB:ML = 0.05:1.0)
[truncated: 1,495 more rows]

[truncated: 2 more sheets: ML flux_conditions, Consistency_FVA_FBA]
